# Supplementary material for: A Low-Molecular-Weight Compound K7174 Represses Hepcidin: Possible Therapeutic Strategy against Anemia of Chronic Disease
Source: PLoS One. 2013 Sep 27;8(9):e75568. doi: 10.1371/journal.pone.0075568 (PMC3785497; doi:10.1371/journal.pone.0075568)
Supplement: Table S2 — Expression profiling data by K7174 treatment in HepG2 cells. Genes showing > 1.5-fold activation or repression are shown. We set a cut-off value of > 100 based on the expression signal. (XLSX) [file pone.0075568.s005.xlsx]

## Sheet: Upregulated
Name	ID	ensembl_id	RefSeq_id	Enterz_id	symbol	description	GO_biological_process	GO_molecular_function	GO_cellular_component	rawdata_Cy5	rawdata_Cy3	BG subtraction_Cy5	BG subtraction_Cy3	Normalized_Cy5	Normalized_Cy3	ratio(Cy3/Cy5)	LOG2[ratio(Cy3/Cy5)]	up	down	Flag_Cy5	Flag_Cy3
opHsV0400005901	opHsV0400005901	ENSG00000146678	NM_000596	3484	IGFBP1	Insulin-like growth factor-binding protein 1 Precursor (IGF-binding protein 1)(IGFBP-1)(IBP-1)(Placental protein 12)(PP12) [Source:UniProtKB/Swiss-Prot;Acc:P08833]	GO:0007165 signal transduction,GO:0001558 regulation of cell growth	GO:0005520 insulin-like growth factor binding	GO:0005576 extracellular region,GO:0005615 extracellular space	618.613	60094	595.254	60016.2	595.254	31314.8	52.6074	5.71719	***		OK	OK
H200009720	H200009720	ENSG00000130513	NM_004864	9518	GDF15	Growth/differentiation factor 15 Precursor (GDF-15)(Placental bone morphogenetic protein)(Placental TGF-beta)(Macrophage inhibitory cytokine 1)(MIC-1)(Prostate differentiation factor)(NSAID-activated gene 1 protein)(NAG-1)(NSAID-regulated gene 1 protein)(NRG-1) [Source:UniProtKB/Swiss-Prot;Acc:Q99988]	GO:0007165 signal transduction,GO:0007267 cell-cell signaling,GO:0007179 transforming growth factor beta receptor signaling pathway	GO:0008083 growth factor activity,GO:0005125 cytokine activity	GO:0005576 extracellular region,GO:0005794 Golgi apparatus,GO:0005615 extracellular space	2299.42	63904	2276.06	63826.2	2276.06	33302.7	14.6317	3.87103	***		OK	OK
H200001854	H200001854	ENSG00000134363	NM_006350;NM_006350	10468	FST	Follistatin Precursor (FS)(Activin-binding protein) [Source:UniProtKB/Swiss-Prot;Acc:P19883]	GO:0000122 negative regulation of transcription from RNA polymerase II promoter,GO:0007276 gamete generation,GO:0042475 odontogenesis of dentine-containing tooth,GO:0007389 pattern specification process,GO:0043616 keratinocyte proliferation,GO:0030509 BMP signaling pathway,GO:0031069 hair follicle morphogenesis,GO:0045596 negative regulation of cell differentiation,GO:0008585 female gonad develop…	GO:0005515 protein binding,GO:0005488 binding,GO:0043395 heparan sulfate proteoglycan binding,GO:0017106 activin inhibitor activity	GO:0005576 extracellular region	172.107	3973.43	148.749	3895.65	148.749	2032.64	13.6649	3.7724	***		OK	OK
AHsV10002870	AHsV10002870	-	NM_016639.2	51330	TNFRSF12A	Tumor necrosis factor receptor superfamily member 12A Precursor (Fibroblast growth factor-inducible immediate-early response protein 14)(FGF-inducible 14)(Tweak-receptor)(TweakR)(CD266 antigen) [Source:UniProtKB/Swiss-Prot;Acc:Q9NP84]	GO:0001525 angiogenesis,GO:0006915 apoptosis,GO:0006928 cell motion,GO:0006931 substrate-bound cell migration, cell attachment to substrate,GO:0007155 cell adhesion,GO:0007275 multicellular organismal development,GO:0008219 cell death,GO:0030154 cell diff	GO:0004872 receptor activity,GO:0005515 protein binding	GO:0001726 ruffle,GO:0005886 plasma membrane,GO:0009986 cell surface,GO:0016021 integral to membrane	791.476	17905	768.118	17827.2	768.118	9301.75	12.1098	3.5981	***		OK	OK
opHsV0400001031	opHsV0400001031	ENSG00000177606	NM_002228	3725	JUN	Transcription factor AP-1 (Activator protein 1)(AP1)(Proto-oncogene c-jun)(V-jun avian sarcoma virus 17 oncogene homolog)(p39) [Source:UniProtKB/Swiss-Prot;Acc:P05412]	GO:0006355 regulation of transcription, DNA-dependent,GO:0009987 cellular process,GO:0045944 positive regulation of transcription from RNA polymerase II promoter,GO:0045449 regulation of transcription,GO:0051726 regulation of cell cycle,GO:0042493 response to drug,GO:0031953 negative regulation of protein amino acid autophosphorylation,GO:0035026 leading edge cell differentiation	GO:0003677 DNA binding,GO:0003700 transcription factor activity,GO:0043565 sequence-specific DNA binding,GO:0046983 protein dimerization activity,GO:0003702 RNA polymerase II transcription factor activity	GO:0005634 nucleus,GO:0005829 cytosol,GO:0005667 transcription factor complex,GO:0000228 nuclear chromosome	129.178	2437.97	105.82	2360.19	105.82	1231.48	11.6375	3.54071	***		OK	OK
AHsV10002983	AHsV10002983	-	NM_005564.3	3934	LCN2	Neutrophil gelatinase-associated lipocalin Precursor (NGAL)(p25)(25 kDa alpha-2-microglobulin-related subunit of MMP-9)(Lipocalin-2)(Oncogene 24p3) [Source:UniProtKB/Swiss-Prot;Acc:P80188]	GO:0006629 lipid metabolic process,GO:0006810 transport	GO:0005215 transporter activity,GO:0005488 binding,GO:0005550 pheromone binding	GO:0005576 extracellular region	127.584	2205.44	104.225	2127.67	104.225	1110.16	10.6515	3.41298	***		OK	OK
H300018513	H300018513	ENSG00000067082	NM_001300	1316	COPEB	Krueppel-like factor 6 (Core promoter element-binding protein)(B-cell-derived protein 1)(Proto-oncogene BCD1)(Transcription factor Zf9)(GC-rich sites-binding factor GBF) [Source:UniProtKB/Swiss-Prot;Acc:Q99612]	GO:0006350 transcription,GO:0006355 regulation of transcription, DNA-dependent,GO:0019221 cytokine and chemokine mediated signaling pathway,GO:0030183 B cell differentiation,GO:0045944 positive regulation of transcription from RNA polymerase II promoter,GO:0042060 wound healing	GO:0003677 DNA binding,GO:0008270 zinc ion binding,GO:0046872 metal ion binding,GO:0003676 nucleic acid binding,GO:0016563 transcription activator activity,GO:0003700 transcription factor activity,GO:0003690 double-stranded DNA binding	GO:0005634 nucleus,GO:0005622 intracellular,GO:0005737 cytoplasm	209.281	3770.89	185.923	3693.12	185.923	1926.96	10.3643	3.37355	***		OK	OK
H200019847	H200019847	ENSG00000175197	NM_004083	1649	DDIT3	DNA damage-inducible transcript 3 (DDIT-3)(Growth arrest and DNA-damage-inducible protein GADD153)(C/EBP-homologous protein)(CHOP) [Source:UniProtKB/Swiss-Prot;Acc:P35638]	GO:0006355 regulation of transcription, DNA-dependent,GO:0007049 cell cycle,GO:0006974 response to DNA damage stimulus,GO:0045454 cell redox homeostasis,GO:0030968 endoplasmic reticulum unfolded protein response,GO:0043065 positive regulation of apoptosis,GO:0045941 positive regulation of transcription,GO:0006979 response to oxidative stress,GO:0007568 aging,GO:0007050 cell cycle arrest,GO:004254…	GO:0003700 transcription factor activity,GO:0043565 sequence-specific DNA binding,GO:0046983 protein dimerization activity,GO:0003714 transcription corepressor activity	GO:0005634 nucleus,GO:0005737 cytoplasm,GO:0005737 cytoplasm	301.718	5445.44	278.359	5367.66	278.359	2800.69	10.0614	3.33077	***		OK	OK
CHsGV10000517	CHsGV10000517	-	NM_014331.3	23657	SLC7A11	Cystine/glutamate transporter (Amino acid transport system xc-)(xCT)(Solute carrier family 7 member 11)(Calcium channel blocker resistance protein CCBR1) [Source:UniProtKB/Swiss-Prot;Acc:Q9UPY5]	GO:0006810 transport,GO:0006865 amino acid transport	GO:0015171 amino acid transmembrane transporter activity,GO:0015327 cystine:glutamate antiporter activity	GO:0016021 integral to membrane,GO:0016020 membrane	174.468	2848.3	151.109	2770.52	151.109	1445.58	9.56645	3.25798	***		OK	OK
H200013143	H200013143	ENSG00000172070	NM_080725	140809	SRXN1	Sulfiredoxin-1 (EC 1.8.98.2) [Source:UniProtKB/Swiss-Prot;Acc:Q9BYN0]	GO:0055114 oxidation reduction,GO:0006979 response to oxidative stress	GO:0003677 DNA binding,GO:0000287 magnesium ion binding,GO:0000166 nucleotide binding,GO:0005524 ATP binding,GO:0016209 antioxidant activity,GO:0032542 sulfiredoxin activity	GO:0005737 cytoplasm,GO:0005829 cytosol	576.548	10081.4	553.189	10003.6	553.189	5219.61	9.43548	3.2381	***		OK	OK
H300020771	H300020771	ENSG00000161011	NM_003900	8878	SQSTM1	Sequestosome-1 (Phosphotyrosine-independent ligand for the Lck SH2 domain of 62 kDa)(Ubiquitin-binding protein p62)(EBI3-associated protein of 60 kDa)(p60)(EBIAP) [Source:UniProtKB/Swiss-Prot;Acc:Q13501]	-	GO:0008270 zinc ion binding	-	2009.83	34765	1986.48	34687.2	1986.48	18098.8	9.11101	3.18761	***		OK	OK
H200007984	H200007984	ENSG00000120129	NM_004417	1843	DUSP1	Dual specificity protein phosphatase 1 (EC 3.1.3.48)(EC 3.1.3.16)(MAP kinase phosphatase 1)(MKP-1)(Protein-tyrosine phosphatase CL100)(Dual specificity protein phosphatase hVH1) [Source:UniProtKB/Swiss-Prot;Acc:P28562]	GO:0007049 cell cycle,GO:0007242 intracellular signaling cascade,GO:0006979 response to oxidative stress,GO:0006470 protein amino acid dephosphorylation,GO:0016311 dephosphorylation,GO:0000087 M phase of mitotic cell cycle,GO:0007242 intracellular signaling cascade	GO:0005515 protein binding,GO:0016787 hydrolase activity,GO:0004725 protein tyrosine phosphatase activity,GO:0008138 protein tyrosine/serine/threonine phosphatase activity,GO:0016791 phosphatase activity,GO:0004726 non-membrane spanning protein tyrosine phosphatase activity,GO:0017017 MAP kinase tyrosine/serine/threonine phosphatase activity	GO:0005622 intracellular	133.717	1941.46	110.359	1863.68	110.359	972.415	8.8114	3.13937	***		OK	OK
H200002223	H200002223	ENSG00000198431	-	7296	TXNRD1	Thioredoxin reductase 1, cytoplasmic (TR)(EC 1.8.1.9)(Thioredoxin reductase TR1)(KM-102-derived reductase-like factor)(Gene associated with retinoid-IFN-induced mortality 12 protein)(GRIM-12) [Source:UniProtKB/Swiss-Prot;Acc:Q16881]	GO:0045454 cell redox homeostasis,GO:0006979 response to oxidative stress,GO:0042744 hydrogen peroxide catabolic process	GO:0016491 oxidoreductase activity,GO:0050660 FAD binding,GO:0016654 oxidoreductase activity, acting on NADH or NADPH, disulfide as acceptor,GO:0050661 NADP binding,GO:0004791 thioredoxin-disulfide reductase activity	GO:0005737 cytoplasm,GO:0005829 cytosol	1696.14	24244.5	1672.78	24166.8	1672.78	12609.5	7.53805	2.91419	**		OK	OK
opHsV0400000100	opHsV0400000100	ENSG00000001084	NM_001498	2729	GCLC	Glutamate--cysteine ligase catalytic subunit (EC 6.3.2.2)(Gamma-glutamylcysteine synthetase)(Gamma-ECS)(GCS heavy chain) [Source:UniProtKB/Swiss-Prot;Acc:P48506]	GO:0006750 glutathione biosynthetic process,GO:0045454 cell redox homeostasis,GO:0006916 anti-apoptosis,GO:0006979 response to oxidative stress,GO:0016481 negative regulation of transcription,GO:0006536 glutamate metabolic process,GO:0009725 response to hormone stimulus,GO:0031397 negative regulation of protein ubiquitination,GO:0046685 response to arsenic,GO:0009408 response to heat,GO:0019852 L…	GO:0000287 magnesium ion binding,GO:0016874 ligase activity,GO:0046982 protein heterodimerization activity,GO:0050662 coenzyme binding,GO:0043531 ADP binding,GO:0004357 glutamate-cysteine ligase activity,GO:0016595 glutamate binding	GO:0005829 cytosol,GO:0017109 glutamate-cysteine ligase complex	415.346	5722.6	391.988	5644.82	391.988	2945.31	7.51378	2.90954	**		OK	OK
H200006914	H200006914	ENSG00000166900	NM_004177	-	STX3	Syntaxin-3 [Source:UniProtKB/Swiss-Prot;Acc:Q13277]	GO:0016192 vesicle-mediated transport	GO:0005515 protein binding	GO:0016020 membrane	251.165	3218.88	227.807	3141.1	227.807	1638.94	7.19442	2.84688	**		OK	OK
DHsGV10000162	DHsGV10000162	-	-	100292463	LOC100292463	-	-	-	-	198.363	2472.43	175.004	2394.65	175.004	1249.46	7.13961	2.83584	**		OK	OK
H300006205	H300006205	ENSG00000163993	NM_005980	6286	S100P	Protein S100-P (S100 calcium-binding protein P) [Source:UniProtKB/Swiss-Prot;Acc:P25815]	GO:0043542 endothelial cell migration	GO:0000287 magnesium ion binding,GO:0005509 calcium ion binding,GO:0048306 calcium-dependent protein binding	GO:0005634 nucleus,GO:0005737 cytoplasm	2342.45	31057.9	2319.09	30980.2	2319.09	16164.6	6.97022	2.8012	**		OK	OK
opHsV0400000901	opHsV0400000901	ENSG00000214882	NM_004748	9236	CCPG1	Cell cycle progression protein 1 (Cell cycle progression restoration protein 8) [Source:UniProtKB/Swiss-Prot;Acc:Q9ULG6]	GO:0007049 cell cycle	GO:0004499 flavin-containing monooxygenase activity	GO:0016021 integral to membrane,GO:0016020 membrane,GO:0005792 microsome	292.661	3673.1	269.302	3595.32	269.302	1875.94	6.96591	2.80031	**		OK	OK
H200001568	H200001568	ENSG00000130766	NM_031459	83667	SESN2	Sestrin-2 (Hi95) [Source:UniProtKB/Swiss-Prot;Acc:P58004]	GO:0007050 cell cycle arrest	-	GO:0005634 nucleus,GO:0005737 cytoplasm	189.461	2188.2	166.102	2110.42	166.102	1101.16	6.62939	2.72888	**		OK	OK
H200010382	H200010382	ENSG00000023909	NM_002061	2730	GCLM	Glutamate--cysteine ligase regulatory subunit (Gamma-glutamylcysteine synthetase regulatory subunit)(Gamma-ECS regulatory subunit)(GCS light chain)(Glutamate--cysteine ligase modifier subunit) [Source:UniProtKB/Swiss-Prot;Acc:P48507]	GO:0006750 glutathione biosynthetic process,GO:0055114 oxidation reduction,GO:0006979 response to oxidative stress,GO:0006536 glutamate metabolic process,GO:0042493 response to drug,GO:0043524 negative regulation of neuron apoptosis,GO:0006534 cysteine metabolic process,GO:0050880 regulation of blood vessel size,GO:0051409 response to nitrosative stress,GO:0051900 regulation of mitochondrial depo…	GO:0005515 protein binding,GO:0016491 oxidoreductase activity,GO:0046982 protein heterodimerization activity,GO:0004357 glutamate-cysteine ligase activity,GO:0035226 glutamate-cysteine ligase catalytic subunit binding	GO:0005829 cytosol,GO:0005625 soluble fraction,GO:0017109 glutamate-cysteine ligase complex	488.299	5955.49	464.94	5877.71	464.94	3066.82	6.59617	2.72163	**		OK	OK
opHsV0400000234	opHsV0400000234	ENSG00000133639	NM_001731	694	BTG1	Protein BTG1 (B-cell translocation gene 1 protein) [Source:UniProtKB/Swiss-Prot;Acc:P62324]	GO:0008285 negative regulation of cell proliferation,GO:0016477 cell migration,GO:0030308 negative regulation of cell growth,GO:0042981 regulation of apoptosis,GO:0045449 regulation of transcription,GO:0045766 positive regulation of angiogenesis,GO:0006479 protein amino acid methylation,GO:0045663 positive regulation of myoblast differentiation,GO:0045603 positive regulation of endothelial cell d…	GO:0003712 transcription cofactor activity,GO:0019900 kinase binding	GO:0005634 nucleus,GO:0005737 cytoplasm	242.779	2841.92	219.42	2764.14	219.42	1442.25	6.573	2.71655	**		OK	OK
H200014664	H200014664	ENSG00000140297	NM_004751;NM_004751	9245	GCNT3	Beta-1,3-galactosyl-O-glycosyl-glycoprotein beta-1,6-N-acetylglucosaminyltransferase 3 (EC 2.4.1.102)(EC 2.4.1.150)(Core 2/core 4 beta-1,6-N-acetylglucosaminyltransferase)(C2/4GnT)(C2GnT-mucin type)(hC2GnT-M)(C2GnT-M) [Source:UniProtKB/Swiss-Prot;Acc:O95395]	GO:0005975 carbohydrate metabolic process,GO:0006493 protein amino acid O-linked glycosylation	GO:0016757 transferase activity, transferring glycosyl groups,GO:0008375 acetylglucosaminyltransferase activity,GO:0003829 beta-1,3-galactosyl-O-glycosyl-glycoprotein beta-1,6-N-acetylglucosaminyltransferase activity,GO:0008109 N-acetyllactosaminide beta-1,6-N-acetylglucosaminyltransferase activity	GO:0016021 integral to membrane,GO:0016020 membrane,GO:0005624 membrane fraction,GO:0005794 Golgi apparatus,GO:0000139 Golgi membrane	126.991	1382.2	103.632	1304.42	103.632	680.61	6.56756	2.71536	**		OK	OK
H300008640	H300008640	ENSG00000147893	-	-	AL158206.8	-	-	-	-	287.749	3398.29	264.391	3320.51	264.391	1732.55	6.55298	2.71215	**		OK	OK
H300007284	H300007284	ENSG00000140961	NM_182981;NM_182981;NM_182980	29948	OSGIN1	Oxidative stress-induced growth inhibitor 1 (Pregnancy-induced growth inhibitor OKL38)(Ovary, kidney and liver protein 38)(huOKL38) [Source:UniProtKB/Swiss-Prot;Acc:Q9UJX0]	-	-	-	225.859	2563.64	202.5	2485.86	202.5	1297.05	6.40517	2.67924	**		OK	OK
CHsGV10002623	CHsGV10002623	-	NM_022818.4	81631	MAP1LC3B	Microtubule-associated proteins 1A/1B light chain 3B Precursor (Microtubule-associated protein 1 light chain 3 beta)(MAP1A/1B light chain 3 B)(MAP1A/MAP1B LC3 B)(MAP1 light chain 3-like protein 2)(Autophagy-related protein LC3 B)(Autophagy-related ubiquitin-like modifier LC3 B) [Source:UniProtKB/Swiss-Prot;Acc:Q9GZQ8]	GO:0006914 autophagy,GO:0019941 modification-dependent protein catabolic process	GO:0005515 protein binding	GO:0005737 cytoplasm,GO:0005622 intracellular,GO:0031410 cytoplasmic vesicle,GO:0005874 microtubule,GO:0005776 autophagic vacuole,GO:0031090 organelle membrane	649.106	7341.91	625.747	7264.13	625.747	3790.21	6.0571	2.59863	**		OK	OK
H200016773	H200016773	ENSG00000164171	NM_002203	3673	ITGA2	Integrin alpha-2 Precursor (Platelet membrane glycoprotein Ia)(GPIa)(Collagen receptor)(VLA-2 alpha chain)(CD49 antigen-like family member B)(CD49b antigen) [Source:UniProtKB/Swiss-Prot;Acc:P17301]	GO:0007155 cell adhesion,GO:0007160 cell-matrix adhesion,GO:0009887 organ morphogenesis,GO:0007229 integrin-mediated signaling pathway,GO:0007596 blood coagulation	GO:0000287 magnesium ion binding,GO:0005509 calcium ion binding,GO:0004872 receptor activity,GO:0042802 identical protein binding,GO:0005518 collagen binding	GO:0005886 plasma membrane,GO:0016021 integral to membrane,GO:0009897 external side of plasma membrane,GO:0008305 integrin complex	309.064	3355.02	285.706	3277.24	285.706	1709.97	5.98508	2.58137	**		OK	OK
H200006172	H200006172	ENSG00000070669	NM_133436;NM_001673	440	ASNS	Asparagine synthetase [glutamine-hydrolyzing] (EC 6.3.5.4)(Glutamine-dependent asparagine synthetase)(Cell cycle control protein TS11) [Source:UniProtKB/Swiss-Prot;Acc:P08243]	GO:0008152 metabolic process,GO:0006541 glutamine metabolic process,GO:0008652 amino acid biosynthetic process,GO:0045931 positive regulation of mitotic cell cycle,GO:0043066 negative regulation of apoptosis,GO:0006529 asparagine biosynthetic process,GO:0042149 cellular response to glucose starvation	GO:0016874 ligase activity,GO:0004066 asparagine synthase (glutamine-hydrolyzing) activity	GO:0005829 cytosol,GO:0005625 soluble fraction	684.426	7642.38	661.067	7564.6	661.067	3946.99	5.97064	2.57788	**		OK	OK
H200001502	H200001502	ENSG00000173334	NM_025195	10221	TRIB1	Tribbles homolog 1 (TRB-1)(SKIP1)(G-protein-coupled receptor-induced protein 2)(GIG-2) [Source:UniProtKB/Swiss-Prot;Acc:Q96RU8]	GO:0006468 protein amino acid phosphorylation,GO:0032496 response to lipopolysaccharide,GO:0007254 JNK cascade,GO:0006469 negative regulation of protein kinase activity,GO:0043405 regulation of MAP kinase activity,GO:0043433 negative regulation of transcription factor activity,GO:0014912 negative regulation of smooth muscle cell migration,GO:0031665 negative regulation of lipopolysaccharide-media…	GO:0005524 ATP binding,GO:0004674 protein serine/threonine kinase activity,GO:0004713 protein tyrosine kinase activity,GO:0008134 transcription factor binding,GO:0004672 protein kinase activity,GO:0004860 protein kinase inhibitor activity,GO:0031434 mitogen-activated protein kinase kinase binding	GO:0005634 nucleus,GO:0005737 cytoplasm	152.284	1525.99	128.926	1448.21	128.926	755.637	5.86103	2.55115	**		OK	OK
H200010391	H200010391	ENSG00000084734	NM_001486	2646	GCKR	Glucokinase regulatory protein (Glucokinase regulator) [Source:UniProtKB/Swiss-Prot;Acc:Q14397]	GO:0000060 protein import into nucleus, translocation,GO:0001678 cellular glucose homeostasis	GO:0005515 protein binding,GO:0016301 kinase activity,GO:0004857 enzyme inhibitor activity	GO:0005634 nucleus,GO:0005829 cytosol,GO:0005654 nucleoplasm	183.716	1875.61	160.358	1797.83	160.358	938.056	5.84978	2.54838	**		OK	OK
H200007193	H200007193	ENSG00000143384	NM_021960;NM_021960	4170	MCL1	Induced myeloid leukemia cell differentiation protein Mcl-1 (Bcl-2-related protein EAT/mcl1)(mcl1/EAT) [Source:UniProtKB/Swiss-Prot;Acc:Q07820]	GO:0042981 regulation of apoptosis	-	-	442.749	4736.75	419.391	4658.97	419.391	2430.92	5.7963	2.53513	**		OK	OK
CHsGV10000730	CHsGV10000730	-	NM_005194.2	1051	CEBPB	CCAAT/enhancer-binding protein beta (C/EBP beta)(Nuclear factor NF-IL6)(Transcription factor 5) [Source:UniProtKB/Swiss-Prot;Acc:P17676]	GO:0045944 positive regulation of transcription from RNA polymerase II promoter,GO:0006917 induction of apoptosis,GO:0006916 anti-apoptosis,GO:0045941 positive regulation of transcription,GO:0006954 inflammatory response,GO:0006955 immune response,GO:0045444 fat cell differentiation,GO:0001892 embryonic placenta development,GO:0006953 acute-phase response,GO:0030182 neuron differentiation,GO:0045…	GO:0042803 protein homodimerization activity,GO:0046982 protein heterodimerization activity,GO:0043565 sequence-specific DNA binding,GO:0003700 transcription factor activity,GO:0016563 transcription activator activity,GO:0046983 protein dimerization activity,GO:0042803 protein homodimerization activity,GO:0046982 protein heterodimerization activity,GO:0043565 sequence-specific DNA binding,GO:0005…	GO:0005737 cytoplasm,GO:0005634 nucleus,GO:0016363 nuclear matrix,GO:0005634 nucleus,GO:0005737 cytoplasm	731.755	7918.51	708.397	7840.74	708.397	4091.07	5.77512	2.52985	**		OK	OK
AHsV10000157	AHsV10000157	-	NM_003254.2	7076	TIMP1	Metalloproteinase inhibitor 1 Precursor (Tissue inhibitor of metalloproteinases)(TIMP-1)(Erythroid-potentiating activity)(EPA)(Fibroblast collagenase inhibitor)(Collagenase inhibitor) [Source:UniProtKB/Swiss-Prot;Acc:P01033]	GO:0008284 positive regulation of cell proliferation,GO:0043249 erythrocyte maturation,GO:0051045 negative regulation of membrane protein ectodomain proteolysis	GO:0004857 enzyme inhibitor activity,GO:0005515 protein binding,GO:0008191 metalloendopeptidase inhibitor activity	GO:0005576 extracellular region,GO:0005578 proteinaceous extracellular matrix	299.88	3093.68	276.521	3015.9	276.521	1573.61	5.69074	2.50862	**		OK	OK
opHsV0400003760	opHsV0400003760	ENSG00000130066	NM_002970;NM_002970;NM_002970;NM_002970	6303	SAT1	Diamine acetyltransferase 1 (EC 2.3.1.57)(Spermidine/spermine N(1)-acetyltransferase 1)(SSAT-1)(SSAT)(Putrescine acetyltransferase)(Polyamine N-acetyltransferase 1) [Source:UniProtKB/Swiss-Prot;Acc:P21673]	GO:0008152 metabolic process	GO:0008415 acyltransferase activity,GO:0016740 transferase activity,GO:0008080 N-acetyltransferase activity,GO:0004145 diamine N-acetyltransferase activity	GO:0005622 intracellular,GO:0005737 cytoplasm	970.558	10357	947.2	10279.2	947.2	5363.42	5.66239	2.50141	**		OK	OK
DHsGV10004024	DHsGV10004024	-	NM_001354.4;NM_205845.1;NM_001135241.1	100134257	AKR1C2	Aldo-keto reductase family 1 member C2 (EC 1.-.-.-)(Trans-1,2-dihydrobenzene-1,2-diol dehydrogenase)(EC 1.3.1.20)(Type III 3-alpha-hydroxysteroid dehydrogenase)(EC 1.1.1.213)(3-alpha-HSD3)(Dihydrodiol dehydrogenase 2)(DD-2)(DD2)(Dihydrodiol dehydrogenase/bile acid-binding protein)(DD/BABP)(Chlordecone reductase homolog HAKRD) [Source:UniProtKB/Swiss-Prot;Acc:P52895]	GO:0055114 oxidation reduction	GO:0016491 oxidoreductase activity	-	125.786	1188.67	102.427	1110.89	102.427	579.631	5.65895	2.50053	**		OK	OK
AHsV10000263	AHsV10000263	-	NM_002842.2	5794	PTPRH	Receptor-type tyrosine-protein phosphatase H Precursor (EC 3.1.3.48)(Transmembrane-type protein-tyrosine phosphatase type H)(Stomach cancer-associated protein tyrosine phosphatase 1)(SAP-1) [Source:UniProtKB/Swiss-Prot;Acc:Q9HD43]	GO:0006470 protein amino acid dephosphorylation,GO:0006915 apoptosis,GO:0016311 dephosphorylation	GO:0004725 protein tyrosine phosphatase activity,GO:0005515 protein binding,GO:0016787 hydrolase activity,GO:0016791 phosphatase activity	GO:0005737 cytoplasm,GO:0016020 membrane,GO:0016021 integral to membrane	191.139	1894.75	167.781	1816.97	167.781	948.045	5.6505	2.49838	**		OK	OK
AHsV10002782	AHsV10002782	-	NM_001114752.1	1604	CD55	Complement decay-accelerating factor Precursor (CD55 antigen) [Source:UniProtKB/Swiss-Prot;Acc:P08174]	-	-	-	229.969	2252.26	206.61	2174.48	206.61	1134.58	5.49141	2.45718	**		OK	OK
H300022502	H300022502	ENSG00000171988	NM_032776;NM_032776;NM_032776;NM_032776	221037	JMJD1C	Probable JmjC domain-containing histone demethylation protein 2C (EC 1.14.11.-)(Jumonji domain-containing protein 1C)(Thyroid receptor-interacting protein 8)(TRIP-8) [Source:UniProtKB/Swiss-Prot;Acc:Q15652]	GO:0005975 carbohydrate metabolic process,GO:0006350 transcription,GO:0006355 regulation of transcription, DNA-dependent,GO:0016568 chromatin modification,GO:0055114 oxidation reduction	GO:0005515 protein binding,GO:0008270 zinc ion binding,GO:0046872 metal ion binding,GO:0005506 iron ion binding,GO:0003824 catalytic activity,GO:0016491 oxidoreductase activity,GO:0016702 oxidoreductase activity, acting on single donors with incorporation of molecular oxygen, incorporation of two atoms of oxygen,GO:0046966 thyroid hormone receptor binding	GO:0005634 nucleus,GO:0005622 intracellular	145.788	1338.32	122.429	1260.54	122.429	657.716	5.37222	2.42552	**		OK	OK
H300002958	H300002958	ENSG00000101384	NM_000214	182	JAG1	Protein jagged-1 Precursor (Jagged1)(hJ1)(CD339 antigen) [Source:UniProtKB/Swiss-Prot;Acc:P78504]	GO:0007154 cell communication,GO:0007275 multicellular organismal development,GO:0007399 nervous system development,GO:0001525 angiogenesis,GO:0009887 organ morphogenesis,GO:0030216 keratinocyte differentiation,GO:0007219 Notch signaling pathway,GO:0045446 endothelial cell differentiation,GO:0030334 regulation of cell migration,GO:0042127 regulation of cell proliferation,GO:0030097 hemopoiesis,GO…	GO:0005509 calcium ion binding,GO:0005515 protein binding,GO:0005198 structural molecule activity,GO:0008083 growth factor activity,GO:0030414 protease inhibitor activity,GO:0005112 Notch binding	GO:0005886 plasma membrane,GO:0016021 integral to membrane,GO:0016020 membrane,GO:0005576 extracellular region,GO:0005887 integral to plasma membrane	297.156	2881.14	273.798	2803.36	273.798	1462.72	5.34232	2.41747	**		OK	OK
H200001880	H200001880	ENSG00000006327	NM_016639	-	TNFRSF12A	Tumor necrosis factor receptor superfamily member 12A Precursor (Fibroblast growth factor-inducible immediate-early response protein 14)(FGF-inducible 14)(Tweak-receptor)(TweakR)(CD266 antigen) [Source:UniProtKB/Swiss-Prot;Acc:Q9NP84]	-	-	-	791.33	7878.98	767.972	7801.2	767.972	4070.45	5.30025	2.40606	**		OK	OK
H200016317	H200016317	ENSG00000124145	NM_002999	6385	SDC4	Syndecan-4 Precursor (SYND4)(Amphiglycan)(Ryudocan core protein) [Source:UniProtKB/Swiss-Prot;Acc:P31431]	GO:0008150 biological_process	GO:0003674 molecular_function,GO:0008092 cytoskeletal protein binding,GO:0070053 thrombospondin receptor activity	GO:0005886 plasma membrane,GO:0016020 membrane,GO:0005794 Golgi apparatus,GO:0005887 integral to plasma membrane,GO:0009986 cell surface	358.803	3456.01	335.445	3378.24	335.445	1762.67	5.25472	2.39361	**		OK	OK
H300004384	H300004384	ENSG00000119801	NM_016061;NM_016061	51646	YPEL5	Protein yippee-like 5 [Source:UniProtKB/Swiss-Prot;Acc:P62699]	-	-	-	164.134	1482.08	140.776	1404.31	140.776	732.727	5.20493	2.37988	**		OK	OK
AHsV10000644	AHsV10000644	-	NM_005801.3	10209	EIF1	Eukaryotic translation initiation factor 1 (eIF1)(Protein translation factor SUI1 homolog)(Sui1iso1)(A121) [Source:UniProtKB/Swiss-Prot;Acc:P41567]	GO:0006412 translation,GO:0006413 translational initiation,GO:0006446 regulation of translational initiation,GO:0006950 response to stress	GO:0003743 translation initiation factor activity	GO:0005737 cytoplasm	2097.09	20414.2	2073.73	20336.4	2073.73	10610.9	5.11683	2.35525	**		OK	OK
H300005244	H300005244	ENSG00000171471	NM_001085481	643246	MAP1LC3B2	Microtubule-associated proteins 1A/1B light chain 3 beta 2 Precursor (Microtubule-associated proteins 1A/1B light chain 3B-like) [Source:UniProtKB/Swiss-Prot;Acc:A6NCE7]	GO:0006511 ubiquitin-dependent protein catabolic process,GO:0006914 autophagy	-	GO:0016020 membrane,GO:0005874 microtubule,GO:0005737 cytoplasm,GO:0012505 endomembrane system,GO:0031410 cytoplasmic vesicle	1141.02	11025.3	1117.66	10947.5	1117.66	5712.12	5.11077	2.35354	**		OK	OK
H200006884	H200006884	ENSG00000106366	NM_000602	5054	SERPINE1	Plasminogen activator inhibitor 1 Precursor (PAI-1)(PAI)(Endothelial plasminogen activator inhibitor) [Source:UniProtKB/Swiss-Prot;Acc:P05121]	GO:0042730 fibrinolysis,GO:0007596 blood coagulation,GO:0045765 regulation of angiogenesis	GO:0005515 protein binding,GO:0004252 serine-type endopeptidase activity,GO:0004867 serine-type endopeptidase inhibitor activity,GO:0002020 protease binding	GO:0005886 plasma membrane,GO:0005576 extracellular region	699.363	6649.48	676.004	6571.7	676.004	3428.93	5.07234	2.34265	**		OK	OK
H200014567	H200014567	ENSG00000160712	NM_181359;NM_181359	3570	IL6R	Interleukin-6 receptor subunit alpha Precursor (IL-6R-alpha)(IL-6R 1)(Membrane glycoprotein 80)(gp80)(CD126 antigen) [Source:UniProtKB/Swiss-Prot;Acc:P08887]	GO:0007186 G-protein coupled receptor protein signaling pathway,GO:0042981 regulation of apoptosis,GO:0006953 acute-phase response,GO:0045768 positive regulation of anti-apoptosis,GO:0019221 cytokine and chemokine mediated signaling pathway,GO:0048661 positive regulation of smooth muscle cell proliferation,GO:0032755 positive regulation of interleukin-6 production,GO:0042517 positive regulation o…	GO:0004872 receptor activity,GO:0019899 enzyme binding,GO:0005102 receptor binding,GO:0042803 protein homodimerization activity,GO:0005000 vasopressin receptor activity,GO:0004896 hematopoietin/interferon-class (D200-domain) cytokine receptor activity,GO:0004897 ciliary neurotrophic factor receptor activity,GO:0004915 interleukin-6 receptor activity	GO:0005886 plasma membrane,GO:0016021 integral to membrane,GO:0016020 membrane,GO:0005576 extracellular region,GO:0016324 apical plasma membrane,GO:0016323 basolateral plasma membrane,GO:0005896 interleukin-6 receptor complex	158.515	1360.39	135.156	1282.61	135.156	669.229	4.95152	2.30787	**		OK	OK
H200001513	H200001513	ENSG00000006652	NM_001007245	3475	IFRD1	Interferon-related developmental regulator 1 (Nerve growth factor-inducible protein PC4) [Source:UniProtKB/Swiss-Prot;Acc:O00458]	GO:0007275 multicellular organismal development,GO:0042692 muscle cell differentiation,GO:0007518 myoblast cell fate determination,GO:0007527 adult somatic muscle development	GO:0005488 binding	GO:0005634 nucleus	399.565	3614.78	376.206	3537	376.206	1845.51	4.90557	2.29442	**		OK	OK
H200002215	H200002215	ENSG00000172432	NM_019096;NM_019096	54676	GTPBP2	GTP-binding protein 2 [Source:UniProtKB/Swiss-Prot;Acc:Q9BX10]	GO:0007264 small GTPase mediated signal transduction	GO:0000166 nucleotide binding,GO:0005525 GTP binding,GO:0003924 GTPase activity	-	134.225	1088.84	110.866	1011.06	110.866	527.544	4.75839	2.25047	**		OK	OK
H200001305	H200001305	ENSG00000128590	NM_012328	4189	DNAJB9	DnaJ homolog subfamily B member 9 (Microvascular endothelial differentiation gene 1 protein)(Mdg-1) [Source:UniProtKB/Swiss-Prot;Acc:Q9UBS3]	GO:0006457 protein folding	GO:0031072 heat shock protein binding,GO:0051082 unfolded protein binding,GO:0030188 chaperone regulator activity,GO:0030188 chaperone regulator activity	GO:0005634 nucleus,GO:0005737 cytoplasm,GO:0005783 endoplasmic reticulum,GO:0005730 nucleolus,GO:0005737 cytoplasm,GO:0005730 nucleolus	190.836	1576.91	167.477	1499.13	167.477	782.203	4.6705	2.22358	**		OK	OK
H200016976	H200016976	ENSG00000050820	NM_014567;NM_014567;NM_014567	-	BCAR1	Breast cancer anti-estrogen resistance protein 1 (CRK-associated substrate)(p130cas)(Cas scaffolding protein family member 1) [Source:UniProtKB/Swiss-Prot;Acc:P56945]	GO:0016477 cell migration	GO:0005515 protein binding	GO:0030027 lamellipodium	659.985	5669.57	636.626	5591.79	636.626	2917.64	4.58296	2.19628	**		OK	OK
H200013712	H200013712	ENSG00000173812	NM_005801	730144	EIF1	Eukaryotic translation initiation factor 1 (eIF1)(Protein translation factor SUI1 homolog)(Sui1iso1)(A121) [Source:UniProtKB/Swiss-Prot;Acc:P41567]	GO:0006950 response to stress,GO:0006412 translation,GO:0006413 translational initiation,GO:0006446 regulation of translational initiation	GO:0003743 translation initiation factor activity	GO:0005737 cytoplasm	1767.55	15115.7	1744.19	15037.9	1744.19	7846.36	4.49857	2.16947	**		OK	OK
opHsV0400004448	opHsV0400004448	ENSG00000146278	NM_006813;NM_006813	-	PNRC1	Proline-rich nuclear receptor coactivator 1 (Proline-rich protein 2)(B4-2 protein) [Source:UniProtKB/Swiss-Prot;Acc:Q12796]	-	-	-	285.316	2329.3	261.957	2251.52	261.957	1174.78	4.48462	2.16498	**		OK	OK
AHsV10001569	AHsV10001569	-	NM_014567.2	9564	BCAR1	Breast cancer anti-estrogen resistance protein 1 (CRK-associated substrate)(p130cas)(Cas scaffolding protein family member 1) [Source:UniProtKB/Swiss-Prot;Acc:P56945]	GO:0001558 regulation of cell growth,GO:0007015 actin filament organization,GO:0007155 cell adhesion,GO:0007173 epidermal growth factor receptor signaling pathway,GO:0007186 G-protein coupled receptor protein signaling pathway,GO:0007229 integrin-mediated	GO:0004871 signal transducer activity,GO:0005515 protein binding,GO:0017124 SH3 domain binding,GO:0019901 protein kinase binding,GO:0019903 protein phosphatase binding	GO:0001726 ruffle,GO:0005624 membrane fraction,GO:0005737 cytoplasm,GO:0005925 focal adhesion,GO:0030054 cell junction	710.97	5971.66	687.611	5893.88	687.611	3075.26	4.47238	2.16104	**		OK	OK
H300018301	H300018301	ENSG00000116761	NM_001902;NM_001902	1491	CTH	Cystathionine gamma-lyase (EC 4.4.1.1)(Gamma-cystathionase) [Source:UniProtKB/Swiss-Prot;Acc:P32929]	GO:0006520 amino acid metabolic process	GO:0030170 pyridoxal phosphate binding	-	257.037	2055.08	233.679	1977.3	233.679	1031.7	4.41503	2.14242	**		OK	OK
opHsV0400000200	opHsV0400000200	ENSG00000130164	NM_000527	3949	LDLR	Low-density lipoprotein receptor Precursor (LDL receptor) [Source:UniProtKB/Swiss-Prot;Acc:P01130]	GO:0006629 lipid metabolic process,GO:0006869 lipid transport,GO:0044419 interspecies interaction between organisms,GO:0042159 lipoprotein catabolic process,GO:0008202 steroid metabolic process,GO:0006897 endocytosis,GO:0008203 cholesterol metabolic process,GO:0006493 protein amino acid O-linked glycosylation,GO:0042632 cholesterol homeostasis,GO:0030301 cholesterol transport,GO:0030299 cholester…	GO:0005509 calcium ion binding,GO:0005319 lipid transporter activity,GO:0004888 transmembrane receptor activity,GO:0005041 low-density lipoprotein receptor activity,GO:0008034 lipoprotein binding,GO:0030229 very-low-density lipoprotein receptor activity	GO:0005886 plasma membrane,GO:0016020 membrane,GO:0005768 endosome,GO:0005887 integral to plasma membrane,GO:0010008 endosome membrane,GO:0005905 coated pit,GO:0030669 clathrin-coated endocytic vesicle membrane	324.192	2574.73	300.833	2496.95	300.833	1302.84	4.33077	2.11462	**		OK	OK
H300022124	H300022124	ENSG00000130779	NM_198240;NM_198240;NM_198240	-	CLIP1	CAP-Gly domain-containing linker protein 1 (Restin)(Cytoplasmic linker protein 170 alpha-2)(CLIP-170)(Reed-Sternberg intermediate filament-associated protein)(Cytoplasmic linker protein 1) [Source:UniProtKB/Swiss-Prot;Acc:P30622]	-	GO:0008270 zinc ion binding,GO:0003676 nucleic acid binding	-	145.684	1083.13	122.325	1005.36	122.325	524.566	4.28829	2.1004	**		OK	OK
H300003587	H300003587	ENSG00000198747	-	-	AL513480.21	-	-	-	-	2364.52	19155.8	2341.16	19078	2341.16	9954.38	4.2519	2.08811	**		OK	OK
AHsV10002804	AHsV10002804	-	NM_004040.2	388	RHOB	Rho-related GTP-binding protein RhoB Precursor (H6) [Source:UniProtKB/Swiss-Prot;Acc:P62745]	GO:0006886 intracellular protein transport,GO:0006913 nucleocytoplasmic transport,GO:0006927 transformed cell apoptosis,GO:0007155 cell adhesion,GO:0007165 signal transduction,GO:0007264 small GTPase mediated signal transduction,GO:0007266 Rho protein sig	GO:0000166 nucleotide binding,GO:0003924 GTPase activity,GO:0005515 protein binding,GO:0005525 GTP binding,GO:0019003 GDP binding	GO:0005622 intracellular,GO:0005624 membrane fraction,GO:0005625 soluble fraction,GO:0005634 nucleus,GO:0005768 endosome,GO:0005886 plasma membrane,GO:0031902 late endosome membrane	267.524	2061.56	244.165	1983.79	244.165	1035.08	4.23927	2.08382	**		OK	OK
CHsGV10000320	CHsGV10000320	-	NM_000392.3	1244	ABCC2	Canalicular multispecific organic anion transporter 1 (ATP-binding cassette sub-family C member 2)(Multidrug resistance-associated protein 2)(Canalicular multidrug resistance protein) [Source:UniProtKB/Swiss-Prot;Acc:Q92887]	GO:0006810 transport	GO:0005515 protein binding,GO:0005524 ATP binding,GO:0016887 ATPase activity,GO:0017111 nucleoside-triphosphatase activity,GO:0005215 transporter activity,GO:0000166 nucleotide binding,GO:0008514 organic anion transmembrane transporter activity,GO:0005515 protein binding	GO:0016021 integral to membrane,GO:0005887 integral to plasma membrane,GO:0005624 membrane fraction,GO:0016020 membrane,GO:0016324 apical plasma membrane,GO:0046581 intercellular canaliculus,GO:0005624 membrane fraction,GO:0005887 integral to plasma membrane,GO:0016324 apical plasma membrane,GO:0046581 intercellular canaliculus	430.875	3325.35	407.517	3247.58	407.517	1694.49	4.15809	2.05592	**		OK	OK
opHsV0400004192	opHsV0400004192	ENSG00000164733	NM_147782;NM_001908	1508	CTSB	Cathepsin B Precursor (EC 3.4.22.1)(Cathepsin B1)(APP secretase)(APPS) [Contains Cathepsin B light chain;Cathepsin B heavy chain] [Source:UniProtKB/Swiss-Prot;Acc:P07858]	GO:0006508 proteolysis,GO:0042981 regulation of apoptosis,GO:0050790 regulation of catalytic activity,GO:0009611 response to wounding,GO:0009611 response to wounding	GO:0008233 peptidase activity,GO:0008234 cysteine-type peptidase activity,GO:0042277 peptide binding,GO:0004197 cysteine-type endopeptidase activity,GO:0030984 kininogen binding,GO:0042277 peptide binding,GO:0030984 kininogen binding	GO:0005622 intracellular,GO:0005576 extracellular region,GO:0016324 apical plasma membrane,GO:0005739 mitochondrion,GO:0005625 soluble fraction,GO:0005764 lysosome,GO:0042470 melanosome,GO:0009897 external side of plasma membrane,GO:0005576 extracellular region,GO:0005625 soluble fraction,GO:0009897 external side of plasma membrane,GO:0016324 apical plasma membrane	1023.59	8037.53	1000.24	7959.75	1000.24	4153.17	4.15219	2.05387	**		OK	OK
AHsV10002345	AHsV10002345	-	NM_173626.2	284129	SLC26A11	Sodium-independent sulfate anion transporter (Solute carrier family 26 member 11) [Source:UniProtKB/Swiss-Prot;Acc:Q86WA9]	GO:0006810 transport,GO:0006811 ion transport,GO:0008272 sulfate transport	GO:0005215 transporter activity,GO:0008271 secondary active sulfate transmembrane transporter activity,GO:0008509 anion transmembrane transporter activity,GO:0015380 anion exchanger activity	GO:0000139 Golgi membrane,GO:0005783 endoplasmic reticulum,GO:0005789 endoplasmic reticulum membrane,GO:0005794 Golgi apparatus,GO:0005886 plasma membrane,GO:0016020 membrane,GO:0016021 integral to membrane	159.49	1158.79	136.132	1081.01	136.132	564.04	4.14335	2.0508	**		OK	OK
H300018381	H300018381	ENSG00000006453	NM_018842	55971	BAIAP2L1	Brain-specific angiogenesis inhibitor 1-associated protein 2-like protein 1 (BAI1-associated protein 2-like protein 1)(Insulin receptor tyrosine kinase substrate) [Source:UniProtKB/Swiss-Prot;Acc:Q9UHR4]	GO:0007165 signal transduction,GO:0008150 biological_process,GO:0046847 filopodium formation	GO:0003779 actin binding,GO:0003674 molecular_function,GO:0008093 cytoskeletal adaptor activity,GO:0017124 SH3 domain binding	GO:0005575 cellular_component	181.794	1322.29	158.436	1244.51	158.436	649.349	4.0985	2.0351	**		OK	OK
H200017355	H200017355	ENSG00000123240	NM_021980;NM_021980;NM_021980;NM_021980;NM_021980	10133	OPTN	Optineurin (Optic neuropathy-inducing protein)(E3-14.7K-interacting protein)(FIP-2)(Huntingtin-interacting protein L)(Huntingtin yeast partner L)(NEMO-related protein)(Transcription factor IIIA-interacting protein)(TFIIIA-IntP) [Source:UniProtKB/Swiss-Prot;Acc:Q96CV9]	GO:0007165 signal transduction,GO:0000042 protein targeting to Golgi,GO:0008219 cell death,GO:0007030 Golgi organization,GO:0043001 Golgi to plasma membrane protein transport	GO:0008022 protein C-terminus binding	GO:0005737 cytoplasm,GO:0005794 Golgi apparatus	129.925	896.746	106.567	818.967	106.567	427.314	4.00983	2.00354	**		OK	OK
AHsV10002001	AHsV10002001	-	NM_001779	965	CD58	Lymphocyte function-associated antigen 3 Precursor (Ag3)(Surface glycoprotein LFA-3)(CD58 antigen) [Source:UniProtKB/Swiss-Prot;Acc:P19256]	GO:0016337 cell-cell adhesion	GO:0005515 protein binding	GO:0005886 plasma membrane,GO:0005887 integral to plasma membrane,GO:0031225 anchored to membrane	182.545	1288.62	159.187	1210.84	159.187	631.782	3.96881	1.98871	*		OK	OK
H200003069	H200003069	ENSG00000221968	NM_021727	3995	FADS3	Fatty acid desaturase 3 (EC 1.14.19.-)(Cytochrome b5-related protein) [Source:UniProtKB/Swiss-Prot;Acc:Q9Y5Q0]	GO:0006629 lipid metabolic process,GO:0006810 transport,GO:0006633 fatty acid biosynthetic process,GO:0022900 electron transport chain,GO:0006636 unsaturated fatty acid biosynthetic process	GO:0005506 iron ion binding,GO:0020037 heme binding,GO:0016491 oxidoreductase activity,GO:0003674 molecular_function,GO:0046914 transition metal ion binding,GO:0016717 oxidoreductase activity, acting on paired donors, with oxidation of a pair of donors resulting in the reduction of molecular oxygen to two molecules of water	GO:0016021 integral to membrane,GO:0016020 membrane,GO:0005624 membrane fraction,GO:0005783 endoplasmic reticulum,GO:0005789 endoplasmic reticulum membrane	126.978	863.002	103.62	785.223	103.62	409.707	3.95395	1.98329	*		OK	OK
H200005610	H200005610	ENSG00000119820	NM_032312	84272	YIPF4	Protein YIPF4 (YIP1 family member 4) [Source:UniProtKB/Swiss-Prot;Acc:Q9BSR8]	-	-	GO:0016021 integral to membrane,GO:0016020 membrane,GO:0005783 endoplasmic reticulum	822.642	6051.22	799.284	5973.44	799.284	3116.77	3.89946	1.96327	*		OK	OK
opHsV0400002114	opHsV0400002114	ENSG00000214019	-	-	AL034370.1	-	-	-	-	311.788	2232.62	288.43	2154.84	288.43	1124.34	3.89812	1.96278	*		OK	OK
H300018445	H300018445	ENSG00000052841	NM_018259;NM_018259	-	TTC17	Tetratricopeptide repeat protein 17 (TPR repeat protein 17) [Source:UniProtKB/Swiss-Prot;Acc:Q96AE7]	-	GO:0005488 binding	-	193.872	1348.63	170.514	1270.85	170.514	663.095	3.88881	1.95933	*		OK	OK
H300003353	H300003353	ENSG00000120063	NM_006572	10672	GNA13	Guanine nucleotide-binding protein subunit alpha-13 (G-protein subunit alpha-13)(G alpha-13) [Source:UniProtKB/Swiss-Prot;Acc:Q14344]	GO:0007165 signal transduction,GO:0001701 in utero embryonic development,GO:0007243 protein kinase cascade,GO:0007186 G-protein coupled receptor protein signaling pathway,GO:0030154 cell differentiation,GO:0030168 platelet activation,GO:0007264 small GTPase mediated signal transduction,GO:0001569 patterning of blood vessels,GO:0008360 regulation of cell shape,GO:0007266 Rho protein signal transdu…	GO:0005515 protein binding,GO:0000166 nucleotide binding,GO:0005525 GTP binding,GO:0003924 GTPase activity,GO:0004871 signal transducer activity,GO:0019001 guanyl nucleotide binding	GO:0016020 membrane,GO:0005622 intracellular,GO:0042470 melanosome	180.668	1248.2	157.31	1170.42	157.31	610.693	3.88211	1.95684	*		OK	OK
H200015341	H200015341	ENSG00000189060	NM_005318	3005	H1F0	Histone H1.0 (Histone H1(0))(Histone H1') [Source:UniProtKB/Swiss-Prot;Acc:P07305]	GO:0006334 nucleosome assembly	GO:0003677 DNA binding	GO:0005634 nucleus,GO:0005856 cytoskeleton,GO:0005794 Golgi apparatus,GO:0005694 chromosome,GO:0000786 nucleosome	330.541	2355.85	307.182	2278.07	307.182	1188.63	3.86947	1.95214	*		OK	OK
CHsGV10000212	CHsGV10000212	-	NM_147185.2;NM_005751.4	10142	AKAP9	A-kinase anchor protein 9 (Protein kinase A-anchoring protein 9)(PRKA9)(A-kinase anchor protein 450 kDa)(AKAP 450)(A-kinase anchor protein 350 kDa)(AKAP 350)(hgAKAP 350)(AKAP 120-like protein)(Protein hyperion)(Protein yotiao)(Centrosome- and Golgi-localized PKN-associated protein)(CG-NAP) [Source:UniProtKB/Swiss-Prot;Acc:Q99996]	GO:0007155 cell adhesion,GO:0008152 metabolic process	GO:0005524 ATP binding,GO:0005198 structural molecule activity,GO:0003824 catalytic activity,GO:0005102 receptor binding,GO:0005515 protein binding	GO:0015629 actin cytoskeleton,GO:0045202 synapse,GO:0005737 cytoplasm,GO:0000242 pericentriolar material	170.22	1145.41	146.862	1067.64	146.862	557.062	3.79311	1.92338	*		OK	OK
H200010414	H200010414	ENSG00000177426	NM_173209;NM_173209;NM_173209;NM_173209;NM_173208;NM_170695;NM_170695	7050	TGIF	Homeobox protein TGIF1 (5'-TG-3'-interacting factor 1) [Source:UniProtKB/Swiss-Prot;Acc:Q15583]	GO:0008285 negative regulation of cell proliferation,GO:0006355 regulation of transcription, DNA-dependent,GO:0001843 neural tube closure,GO:0000122 negative regulation of transcription from RNA polymerase II promoter,GO:0048387 negative regulation of retinoic acid receptor signaling pathway,GO:0048146 positive regulation of fibroblast proliferation,GO:0007368 determination of left/right symmetry…	GO:0005515 protein binding,GO:0003700 transcription factor activity,GO:0043565 sequence-specific DNA binding,GO:0003682 chromatin binding,GO:0016566 specific transcriptional repressor activity	GO:0005634 nucleus	274.763	1884.34	251.404	1806.56	251.404	942.612	3.74939	1.90666	*		OK	OK
H300005105	H300005105	ENSG00000205730	NM_001034841	162073	ITPRIPL2	Inositol 1,4,5-triphosphate receptor-interacting protein-like 2 Precursor [Source:UniProtKB/Swiss-Prot;Acc:Q3MIP1]	-	-	GO:0016021 integral to membrane,GO:0016020 membrane	194.399	1305.98	171.041	1228.2	171.041	640.84	3.74671	1.90562	*		OK	OK
H200002998	H200002998	ENSG00000113163	NM_005713;NM_005713;NM_005713;NM_031361;NM_031361	10087	COL4A3BP	Collagen type IV alpha-3-binding protein (Ceramide transfer protein)(hCERT)(Goodpasture antigen-binding protein)(GPBP)(StAR-related lipid transfer protein 11)(START domain-containing protein 11)(StARD11) [Source:UniProtKB/Swiss-Prot;Acc:Q9Y5P4]	-	-	-	152.979	1005.91	129.621	928.129	129.621	484.271	3.73606	1.90152	*		OK	OK
H200013986	H200013986	ENSG00000065911	NM_006636	10797	MTHFD2	Bifunctional methylenetetrahydrofolate dehydrogenase/cyclohydrolase, mitochondrial Precursor [Includes NAD-dependent methylenetetrahydrofolate dehydrogenase(EC 1.5.1.15);Methenyltetrahydrofolate cyclohydrolase(EC 3.5.4.9)] [Source:UniProtKB/Swiss-Prot;Acc:P13995]	GO:0008152 metabolic process,GO:0009396 folic acid and derivative biosynthetic process	GO:0016787 hydrolase activity,GO:0005488 binding,GO:0003824 catalytic activity	GO:0005739 mitochondrion	643.003	4469.73	619.644	4391.95	619.644	2291.6	3.69824	1.88684	*		OK	OK
opHsV0400006765	opHsV0400006765	ENSG00000185262	NM_182565	283991	FAM100B	Protein FAM100B [Source:UniProtKB/Swiss-Prot;Acc:Q8IYN6]	-	-	-	869.481	6055.32	846.122	5977.54	846.122	3118.91	3.68612	1.8821	*		OK	OK
H300000895	H300000895	ENSG00000188599	-	-	AC139256.5	GPS, PLAT and transmembrane domain-containing protein FLJ00285 [Source:UniProtKB/Swiss-Prot;Acc:Q6ZNL0]	-	-	GO:0016021 integral to membrane	265.993	1791.25	242.635	1713.47	242.635	894.041	3.68472	1.88156	*		OK	OK
opHsV0400000119	opHsV0400000119	ENSG00000037637	NM_018994	54455	FBXO42	F-box only protein 42 [Source:UniProtKB/Swiss-Prot;Acc:Q6P3S6]	GO:0006511 ubiquitin-dependent protein catabolic process	-	-	135.761	870.36	112.402	792.581	112.402	413.546	3.67916	1.87938	*		OK	OK
H200006759	H200006759	ENSG00000116717	NM_001924;NM_001924	1647	GADD45A	Growth arrest and DNA-damage-inducible protein GADD45 alpha (DNA-damage-inducible transcript 1)(DDIT-1) [Source:UniProtKB/Swiss-Prot;Acc:P24522]	GO:0007049 cell cycle,GO:0006974 response to DNA damage stimulus,GO:0006915 apoptosis,GO:0000079 regulation of cyclin-dependent protein kinase activity,GO:0006281 DNA repair,GO:0007050 cell cycle arrest,GO:0000086 G2/M transition of mitotic cell cycle	-	GO:0005634 nucleus	513.736	3514.52	490.378	3436.74	490.378	1793.2	3.65676	1.87057	*		OK	OK
H300018937	H300018937	ENSG00000116815	NM_001779	-	CD58	Lymphocyte function-associated antigen 3 Precursor (Ag3)(Surface glycoprotein LFA-3)(CD58 antigen) [Source:UniProtKB/Swiss-Prot;Acc:P19256]	-	-	-	134.997	857.814	111.638	780.035	111.638	407	3.64569	1.86619	*		OK	OK
CHsGV10000744	CHsGV10000744	-	NM_018976.4	54407	SLC38A2	Sodium-coupled neutral amino acid transporter 2 (Amino acid transporter A2)(System A amino acid transporter 2)(System N amino acid transporter 2)(System A transporter 1)(Solute carrier family 38 member 2)(Protein 40-9-1) [Source:UniProtKB/Swiss-Prot;Acc:Q96QD8]	GO:0006814 sodium ion transport,GO:0006811 ion transport,GO:0006865 amino acid transport,GO:0006865 amino acid transport	GO:0015293 symporter activity,GO:0031402 sodium ion binding,GO:0015171 amino acid transmembrane transporter activity	GO:0016021 integral to membrane,GO:0005886 plasma membrane,GO:0016020 membrane,GO:0005886 plasma membrane	519.472	3529.31	496.113	3451.54	496.113	1800.91	3.63005	1.85999	*		OK	OK
H300021095	H300021095	ENSG00000051108	NM_014685;NM_014685	9709	HERPUD1	Homocysteine-responsive endoplasmic reticulum-resident ubiquitin-like domain member 1 protein (Methyl methanesulfonate (MMF)-inducible fragment protein 1) [Source:UniProtKB/Swiss-Prot;Acc:Q15011]	GO:0006464 protein modification process,GO:0006986 response to unfolded protein	-	GO:0016021 integral to membrane,GO:0005789 endoplasmic reticulum membrane	1021.9	6974.36	998.539	6896.58	998.539	3598.44	3.6037	1.84948	*		OK	OK
H300021118	H300021118	ENSG00000105327	NM_014417	27113	BBC3	Bcl-2-binding component 3 (p53 up-regulated modulator of apoptosis)(JFY-1) [Source:UniProtKB/Swiss-Prot;Acc:Q9BXH1]	GO:0006917 induction of apoptosis,GO:0006915 apoptosis,GO:0006919 caspase activation,GO:0045926 negative regulation of growth,GO:0001836 release of cytochrome c from mitochondria	GO:0005515 protein binding	GO:0005739 mitochondrion,GO:0005741 mitochondrial outer membrane	217.011	1406.46	193.652	1328.68	193.652	693.27	3.57997	1.83995	*		OK	OK
opHsV0400004536	opHsV0400004536	ENSG00000136051	NM_015275;NM_015275	23325	KIAA1033	UPF0681 protein KIAA1033 [Source:UniProtKB/Swiss-Prot;Acc:Q2M389]	-	-	-	137.749	859.311	114.39	781.532	114.39	407.781	3.56483	1.83383	*		OK	OK
AHsV10002182	AHsV10002182	-	NM_006882.3	4193	MDM2	E3 ubiquitin-protein ligase Mdm2 (EC 6.3.2.-)(p53-binding protein Mdm2)(Oncoprotein Mdm2)(Double minute 2 protein)(Hdm2) [Source:UniProtKB/Swiss-Prot;Acc:Q00987]	-	GO:0005515 protein binding,GO:0008270 zinc ion binding	-	617.899	4136.2	594.54	4058.42	594.54	2117.57	3.56169	1.83256	*		OK	OK
H200003690	H200003690	ENSG00000101255	NM_021158	57761	TRIB3	Tribbles homolog 3 (TRB-3)(Neuronal cell death-inducible putative kinase)(p65-interacting inhibitor of NF-kappa-B)(SINK) [Source:UniProtKB/Swiss-Prot;Acc:Q96RU7]	GO:0006950 response to stress,GO:0006468 protein amino acid phosphorylation,GO:0006350 transcription,GO:0006355 regulation of transcription, DNA-dependent,GO:0006915 apoptosis,GO:0006469 negative regulation of protein kinase activity,GO:0043405 regulation of MAP kinase activity	GO:0005515 protein binding,GO:0005524 ATP binding,GO:0004674 protein serine/threonine kinase activity,GO:0019901 protein kinase binding,GO:0003714 transcription corepressor activity,GO:0004672 protein kinase activity,GO:0004860 protein kinase inhibitor activity	GO:0005634 nucleus	1645.8	11028.7	1622.44	10950.9	1622.44	5713.89	3.52179	1.81631	*		OK	OK
H200019789	H200019789	ENSG00000137267	NM_001069	7280	TUBB2A	Tubulin beta-2A chain [Source:UniProtKB/Swiss-Prot;Acc:Q13885]	GO:0007018 microtubule-based movement,GO:0051258 protein polymerization,GO:0007017 microtubule-based process	GO:0005515 protein binding,GO:0000166 nucleotide binding,GO:0005525 GTP binding,GO:0003924 GTPase activity,GO:0005198 structural molecule activity	GO:0005874 microtubule,GO:0005737 cytoplasm,GO:0043234 protein complex	333.222	2158.79	309.864	2081.01	309.864	1085.81	3.50417	1.80907	*		OK	OK
H200001772	H200001772	ENSG00000070540	NM_017983	55062	WIPI1	WD repeat domain phosphoinositide-interacting protein 1 (WIPI-1)(WD40 repeat protein interacting with phosphoinositides of 49 kDa)(WIPI 49 kDa)(Atg18 protein homolog) [Source:UniProtKB/Swiss-Prot;Acc:Q5MNZ9]	GO:0006914 autophagy,GO:0048203 vesicle targeting, trans-Golgi to endosome	GO:0005102 receptor binding,GO:0030331 estrogen receptor binding,GO:0032266 phosphatidylinositol 3-phosphate binding,GO:0050681 androgen receptor binding	GO:0005737 cytoplasm,GO:0005768 endosome,GO:0005794 Golgi apparatus,GO:0031410 cytoplasmic vesicle,GO:0010008 endosome membrane,GO:0005802 trans-Golgi network,GO:0000421 autophagic vacuole membrane,GO:0034045 pre-autophagosomal structure membrane	249.899	1589.23	226.541	1511.45	226.541	788.63	3.48119	1.79958	*		OK	OK
AHsV10000211	AHsV10000211	-	NM_016474.4	51244	C3orf19	Uncharacterized protein C3orf19 [Source:UniProtKB/Swiss-Prot;Acc:Q6PII3]	-	-	-	142.677	865.054	119.318	787.274	119.318	410.777	3.4427	1.78354	*		OK	OK
H300003362	H300003362	ENSG00000135047	NM_001912;NM_001912	1514	CTSL1	Cathepsin L1 Precursor (EC 3.4.22.15)(Major excreted protein)(MEP) [Contains Cathepsin L1 heavy chain;Cathepsin L1 light chain] [Source:UniProtKB/Swiss-Prot;Acc:P07711]	GO:0006508 proteolysis	GO:0005515 protein binding,GO:0008233 peptidase activity,GO:0008234 cysteine-type peptidase activity,GO:0004197 cysteine-type endopeptidase activity	GO:0005576 extracellular region,GO:0005764 lysosome	814.043	5262.56	790.685	5184.78	790.685	2705.27	3.42143	1.7746	*		OK	OK
H300012071	H300012071	ENSG00000109083	NM_174887	90410	IFT20	Intraflagellar transport protein 20 homolog (hIFT20) [Source:UniProtKB/Swiss-Prot;Acc:Q8IY31]	-	-	-	303.081	1907.14	279.723	1829.36	279.723	954.51	3.41235	1.77076	*		OK	OK
H300002867	H300002867	ENSG00000090339	NM_000201	3383	ICAM1	Intercellular adhesion molecule 1 Precursor (ICAM-1)(Major group rhinovirus receptor)(CD54 antigen) [Source:UniProtKB/Swiss-Prot;Acc:P05362]	GO:0044419 interspecies interaction between organisms,GO:0007157 heterophilic cell adhesion,GO:0016337 cell-cell adhesion,GO:0030155 regulation of cell adhesion,GO:0050900 leukocyte migration,GO:0051856 adhesion to symbiont,GO:0046813 virion attachment, binding of host cell surface receptor,GO:0007159 leukocyte adhesion,GO:0002457 T cell antigen processing and presentation,GO:0033627 cell adhesio…	GO:0005515 protein binding,GO:0004888 transmembrane receptor activity,GO:0005178 integrin binding	GO:0005886 plasma membrane,GO:0016020 membrane,GO:0005737 cytoplasm,GO:0005887 integral to plasma membrane,GO:0005615 extracellular space,GO:0009897 external side of plasma membrane	179.674	1098.64	156.315	1020.86	156.315	532.656	3.40757	1.76874	*		OK	OK
opHsV0400001338	opHsV0400001338	ENSG00000180178	-	-	AC018865.4	Uncharacterized protein FLJ43933 [Source:UniProtKB/Swiss-Prot;Acc:Q6ZU82]	-	-	-	206.091	1266.67	182.732	1188.89	182.732	620.33	3.39475	1.7633	*		OK	OK
H200005977	H200005977	ENSG00000171867	NM_000311;NM_000311	5621	PRNP	Major prion protein Precursor (PrP)(PrP27-30)(PrP33-35C)(ASCR)(CD230 antigen) [Source:UniProtKB/Swiss-Prot;Acc:P04156]	GO:0008152 metabolic process,GO:0006916 anti-apoptosis,GO:0006979 response to oxidative stress,GO:0046686 response to cadmium ion,GO:0051260 protein homooligomerization,GO:0006878 cellular copper ion homeostasis,GO:0046688 response to copper ion,GO:0006916 anti-apoptosis,GO:0046686 response to cadmium ion,GO:0046688 response to copper ion	GO:0008017 microtubule binding,GO:0042802 identical protein binding,GO:0005507 copper ion binding	GO:0005886 plasma membrane,GO:0016020 membrane,GO:0005737 cytoplasm,GO:0005794 Golgi apparatus,GO:0005783 endoplasmic reticulum,GO:0031225 anchored to membrane,GO:0019898 extrinsic to membrane,GO:0045121 membrane raft,GO:0005737 cytoplasm	1935.64	12503.2	1912.28	12425.4	1912.28	6483.22	3.39031	1.76142	*		OK	OK
CHsGV10000902	CHsGV10000902	-	NM_022823.2	64838	FNDC4	Fibronectin type III domain-containing protein 4 Precursor (Fibronectin type III repeat-containing protein 1) [Source:UniProtKB/Swiss-Prot;Acc:Q9H6D8]	-	-	GO:0016021 integral to membrane,GO:0016020 membrane	336.473	2109.74	313.114	2031.96	313.114	1060.22	3.38605	1.7596	*		OK	OK
AHsV10002912	AHsV10002912	-	NM_080655.1	91283	C9orf30	UPF0439 protein C9orf30 [Source:UniProtKB/Swiss-Prot;Acc:Q96H12]	-	GO:0003677 DNA binding	-	290.037	1796.92	266.679	1719.14	266.679	896.996	3.36358	1.75	*		OK	OK
H200001587	H200001587	ENSG00000117616	NM_020317	57035	C1orf63	UPF0471 protein C1orf63 [Source:UniProtKB/Swiss-Prot;Acc:Q9BUV0]	-	-	-	571.749	3596.46	548.39	3518.68	548.39	1835.95	3.34789	1.74325	*		OK	OK
H200003745	H200003745	ENSG00000112701	NM_001100409;NM_001100409	26054	SENP6	Sentrin-specific protease 6 (EC 3.4.22.-)(Sentrin/SUMO-specific protease SENP6)(SUMO-1-specific protease 1) [Source:UniProtKB/Swiss-Prot;Acc:Q9GZR1]	GO:0006508 proteolysis	GO:0005509 calcium ion binding,GO:0008234 cysteine-type peptidase activity	-	178.594	1071.78	155.235	993.996	155.235	518.639	3.34098	1.74027	*		OK	OK
H300003274	H300003274	ENSG00000169155	NM_014007;NM_014007	23099	ZBTB43	Zinc finger and BTB domain-containing protein 43 (Zinc finger protein 297B)(ZnF-x)(Zinc finger and BTB domain-containing protein 22B) [Source:UniProtKB/Swiss-Prot;Acc:O43298]	GO:0006350 transcription,GO:0006355 regulation of transcription, DNA-dependent	GO:0003677 DNA binding,GO:0005515 protein binding,GO:0008270 zinc ion binding,GO:0046872 metal ion binding,GO:0003676 nucleic acid binding	GO:0005634 nucleus,GO:0005622 intracellular	125.249	729.472	101.89	651.693	101.89	340.035	3.33727	1.73867	*		OK	OK
H300006188	H300006188	ENSG00000175793	NM_006142	2810	SFN	14-3-3 protein sigma (Stratifin)(Epithelial cell marker protein 1) [Source:UniProtKB/Swiss-Prot;Acc:P31947]	GO:0008285 negative regulation of cell proliferation,GO:0007165 signal transduction,GO:0000079 regulation of cyclin-dependent protein kinase activity,GO:0030216 keratinocyte differentiation,GO:0043588 skin development,GO:0043616 keratinocyte proliferation,GO:0030307 positive regulation of cell growth,GO:0006469 negative regulation of protein kinase activity,GO:0008630 DNA damage response, signal …	GO:0019904 protein domain specific binding,GO:0008426 protein kinase C inhibitor activity	GO:0005634 nucleus,GO:0005576 extracellular region,GO:0005737 cytoplasm,GO:0005615 extracellular space	697.668	4390	674.309	4312.22	674.309	2249.99	3.33674	1.73844	*		OK	OK
H200004534	H200004534	ENSG00000162616	NM_007034	11080	DNAJB4	DnaJ homolog subfamily B member 4 (Heat shock 40 kDa protein 1 homolog)(Heat shock protein 40 homolog)(HSP40 homolog)(Human liver DnaJ-like protein) [Source:UniProtKB/Swiss-Prot;Acc:Q9UDY4]	GO:0006457 protein folding,GO:0006986 response to unfolded protein,GO:0009408 response to heat	GO:0031072 heat shock protein binding,GO:0051082 unfolded protein binding	-	213.457	1291.01	190.099	1213.23	190.099	633.03	3.33001	1.73553	*		OK	OK
H200013917	H200013917	ENSG00000070159	NM_002829	-	PTPN3	Tyrosine-protein phosphatase non-receptor type 3 (EC 3.1.3.48)(Protein-tyrosine phosphatase H1)(PTP-H1) [Source:UniProtKB/Swiss-Prot;Acc:P26045]	GO:0006470 protein amino acid dephosphorylation,GO:0016311 dephosphorylation	GO:0005515 protein binding,GO:0004725 protein tyrosine phosphatase activity,GO:0008138 protein tyrosine/serine/threonine phosphatase activity,GO:0016791 phosphatase activity	GO:0005856 cytoskeleton	177.152	1056.19	153.794	978.415	153.794	510.509	3.31944	1.73094	*		OK	OK
H200008365	H200008365	ENSG00000124762	NM_078467	1026	CDKN1A	Cyclin-dependent kinase inhibitor 1 (p21)(CDK-interacting protein 1)(Melanoma differentiation-associated protein 6)(MDA-6) [Source:UniProtKB/Swiss-Prot;Acc:P38936]	GO:0008285 negative regulation of cell proliferation,GO:0030308 negative regulation of cell growth,GO:0006974 response to DNA damage stimulus,GO:0000086 G2/M transition of mitotic cell cycle,GO:0007050 cell cycle arrest,GO:0000082 G1/S transition of mitotic cell cycle,GO:0048146 positive regulation of fibroblast proliferation,GO:0009411 response to UV,GO:0030890 positive regulation of B cell prol…	GO:0008270 zinc ion binding,GO:0046872 metal ion binding,GO:0016301 kinase activity,GO:0004860 protein kinase inhibitor activity,GO:0004861 cyclin-dependent protein kinase inhibitor activity,GO:0030332 cyclin binding	GO:0005634 nucleus,GO:0005737 cytoplasm,GO:0005829 cytosol,GO:0005654 nucleoplasm,GO:0000307 cyclin-dependent protein kinase holoenzyme complex	199.596	1192.5	176.237	1114.72	176.237	581.629	3.30026	1.72258	*		OK	OK
H200011257	H200011257	ENSG00000104312	NM_003821	8767	RIPK2	Receptor-interacting serine/threonine-protein kinase 2 (EC 2.7.11.1)(RIP-like-interacting CLARP kinase)(Receptor-interacting protein 2)(RIP-2)(CARD-containing interleukin-1 beta-converting enzyme-associated kinase)(CARD-containing IL-1 beta ICE-kinase) [Source:UniProtKB/Swiss-Prot;Acc:O43353]	GO:0006954 inflammatory response,GO:0007165 signal transduction,GO:0006468 protein amino acid phosphorylation,GO:0042981 regulation of apoptosis,GO:0043123 positive regulation of I-kappaB kinase/NF-kappaB cascade,GO:0043065 positive regulation of apoptosis,GO:0051092 positive regulation of NF-kappaB transcription factor activity,GO:0042098 T cell proliferation	GO:0016740 transferase activity,GO:0005515 protein binding,GO:0000166 nucleotide binding,GO:0005524 ATP binding,GO:0004674 protein serine/threonine kinase activity,GO:0004713 protein tyrosine kinase activity,GO:0004871 signal transducer activity,GO:0004672 protein kinase activity,GO:0030274 LIM domain binding,GO:0050700 CARD domain binding	GO:0005622 intracellular,GO:0005737 cytoplasm,GO:0005829 cytosol	200.636	1188.49	177.278	1110.71	177.278	579.539	3.2691	1.70889	*		OK	OK
H300018424	H300018424	ENSG00000013441	NM_004071	1195	CLK1	Dual specificity protein kinase CLK1 (EC 2.7.12.1)(CDC-like kinase 1) [Source:UniProtKB/Swiss-Prot;Acc:P49759]	GO:0006468 protein amino acid phosphorylation,GO:0008283 cell proliferation	GO:0016740 transferase activity,GO:0000166 nucleotide binding,GO:0005524 ATP binding,GO:0004674 protein serine/threonine kinase activity,GO:0004713 protein tyrosine kinase activity,GO:0004672 protein kinase activity,GO:0004715 non-membrane spanning protein tyrosine kinase activity	GO:0005634 nucleus	565.013	3437.76	541.655	3359.99	541.655	1753.15	3.23665	1.6945	*		OK	OK
H300003983	H300003983	ENSG00000182319	NM_001080826	157285	AC068353.34	Tyrosine-protein kinase SgK223 (EC 2.7.10.2)(Sugen kinase 223) [Source:UniProtKB/Swiss-Prot;Acc:Q86YV5]	GO:0006468 protein amino acid phosphorylation	GO:0016740 transferase activity,GO:0000166 nucleotide binding,GO:0005524 ATP binding,GO:0004674 protein serine/threonine kinase activity,GO:0004713 protein tyrosine kinase activity,GO:0004672 protein kinase activity,GO:0004715 non-membrane spanning protein tyrosine kinase activity	-	134.017	761.397	110.659	683.618	110.659	356.692	3.22335	1.68856	*		OK	OK
H200002184	H200002184	ENSG00000151693	NM_003887	8853	DDEF2	Development and differentiation-enhancing factor 2 (Pyk2 C-terminus-associated protein)(PAP)(Paxillin-associated protein with ARFGAP activity 3)(PAG3) [Source:UniProtKB/Swiss-Prot;Acc:O43150]	GO:0032312 regulation of ARF GTPase activity	GO:0008270 zinc ion binding,GO:0008060 ARF GTPase activator activity	-	215.297	1262.24	191.938	1184.46	191.938	618.02	3.21989	1.68701	*		OK	OK
CHsGV10003958	CHsGV10003958	-	NM_021943.2	60685	ZFAND3	AN1-type zinc finger protein 3 (Testis-expressed sequence 27) [Source:UniProtKB/Swiss-Prot;Acc:Q9H8U3]	-	GO:0003677 DNA binding,GO:0008270 zinc ion binding,GO:0046872 metal ion binding	-	172.414	990.177	149.055	912.398	149.055	476.063	3.19388	1.67531	*		OK	OK
opHsV0400006608	opHsV0400006608	ENSG00000164695	NM_152284	92421	CHMP4C	Charged multivesicular body protein 4c (Chromatin-modifying protein 4c)(CHMP4c)(Vacuolar protein-sorting-associated protein 7-3)(SNF7-3)(hSnf7-3)(SNF7 homolog associated with Alix 3) [Source:UniProtKB/Swiss-Prot;Acc:Q96CF2]	GO:0015031 protein transport	-	GO:0005737 cytoplasm	168.559	965.359	145.201	887.58	145.201	463.114	3.18947	1.67332	*		OK	OK
H200019824	H200019824	ENSG00000160714	NM_017582	55585	UBE2Q1	Ubiquitin-conjugating enzyme E2 Q1 (EC 6.3.2.19)(Ubiquitin-protein ligase Q1)(Ubiquitin carrier protein Q1)(Protein NICE-5) [Source:UniProtKB/Swiss-Prot;Acc:Q7Z7E8]	GO:0006511 ubiquitin-dependent protein catabolic process,GO:0043687 post-translational protein modification,GO:0051246 regulation of protein metabolic process	GO:0005515 protein binding,GO:0000166 nucleotide binding,GO:0005524 ATP binding,GO:0016874 ligase activity,GO:0004842 ubiquitin-protein ligase activity,GO:0019787 small conjugating protein ligase activity	-	1289.16	7786.09	1265.8	7708.31	1265.8	4021.98	3.17743	1.66786	*		OK	OK
CHsGV10002818	CHsGV10002818	-	NM_198850.3	653583	PHLDB3	Pleckstrin homology-like domain family B member 3 [Source:UniProtKB/Swiss-Prot;Acc:Q6NSJ2]	-	-	-	136.272	764.674	112.914	686.895	112.914	358.402	3.17413	1.66636	*		OK	OK
AHsV10001067	AHsV10001067	-	NM_153373.2	85007	AGXT2L2	Alanine--glyoxylate aminotransferase 2-like 2 (EC 2.6.1.-) [Source:UniProtKB/Swiss-Prot;Acc:Q8IUZ5]	-	GO:0008483 transaminase activity,GO:0016740 transferase activity,GO:0030170 pyridoxal phosphate binding	GO:0005739 mitochondrion	168.897	957.921	145.539	880.142	145.539	459.233	3.1554	1.65782	*		OK	OK
H200013953	H200013953	ENSG00000156273	NM_001011545;NM_001186	571	BACH1	Transcription regulator protein BACH1 (BTB and CNC homolog 1)(HA2303) [Source:UniProtKB/Swiss-Prot;Acc:O14867]	GO:0006355 regulation of transcription, DNA-dependent,GO:0045449 regulation of transcription	GO:0003677 DNA binding,GO:0005515 protein binding,GO:0003700 transcription factor activity,GO:0043565 sequence-specific DNA binding,GO:0046983 protein dimerization activity	GO:0005634 nucleus,GO:0005829 cytosol	177.557	1003.57	154.199	925.795	154.199	483.053	3.13266	1.64739	*		OK	OK
AHsV10000235	AHsV10000235	-	NM_001029896.1	11152	PRAF2	PRA1 family protein 2 [Source:UniProtKB/Swiss-Prot;Acc:O60831]	-	-	-	141.509	786.427	118.151	708.648	118.151	369.752	3.1295	1.64593	*		OK	OK
H200013894	H200013894	ENSG00000173846	NM_004073	1263	PLK3	Serine/threonine-protein kinase PLK3 (EC 2.7.11.21)(Polo-like kinase 3)(PLK-3)(Cytokine-inducible serine/threonine-protein kinase)(FGF-inducible kinase)(Proliferation-related kinase) [Source:UniProtKB/Swiss-Prot;Acc:Q9H4B4]	GO:0006468 protein amino acid phosphorylation,GO:0007049 cell cycle	GO:0016740 transferase activity,GO:0005515 protein binding,GO:0000166 nucleotide binding,GO:0005524 ATP binding,GO:0004674 protein serine/threonine kinase activity,GO:0004713 protein tyrosine kinase activity,GO:0004672 protein kinase activity,GO:0042801 polo kinase kinase activity	GO:0016020 membrane,GO:0030425 dendrite,GO:0030425 dendrite	178.587	1006.25	155.229	928.472	155.229	484.45	3.12088	1.64195	*		OK	OK
H200012208	H200012208	ENSG00000109220	NM_012110	26511	CHIC2	Cysteine-rich hydrophobic domain 2 protein (BrX-like translocated in leukemia) [Source:UniProtKB/Swiss-Prot;Acc:Q9UKJ5]	GO:0008150 biological_process	GO:0003674 molecular_function	GO:0005886 plasma membrane,GO:0005575 cellular_component,GO:0005794 Golgi apparatus,GO:0031410 cytoplasmic vesicle,GO:0005798 Golgi-associated vesicle	191.136	1081.2	167.777	1003.42	167.777	523.558	3.12056	1.6418	*		OK	OK
H300012657	H300012657	ENSG00000100097	NM_002305	3956	LGALS1	Galectin-1 (Lectin galactoside-binding soluble 1)(Beta-galactoside-binding lectin L-14-I)(Lactose-binding lectin 1)(S-Lac lectin 1)(Galaptin)(14 kDa lectin)(HPL)(HBL)(Putative MAPK-activating protein PM12) [Source:UniProtKB/Swiss-Prot;Acc:P09382]	GO:0042981 regulation of apoptosis,GO:0043123 positive regulation of I-kappaB kinase/NF-kappaB cascade,GO:0045445 myoblast differentiation	GO:0005515 protein binding,GO:0005529 sugar binding,GO:0004871 signal transducer activity,GO:0016936 galactoside binding	GO:0005622 intracellular,GO:0005737 cytoplasm,GO:0005615 extracellular space	377.091	2185.4	353.732	2107.62	353.732	1099.7	3.10884	1.63638	*		OK	OK
opHsV0400006584	opHsV0400006584	ENSG00000145860	NM_144726	153830	RNF145	RING finger protein 145 [Source:UniProtKB/Swiss-Prot;Acc:Q96MT1]	-	GO:0005515 protein binding,GO:0008270 zinc ion binding,GO:0046872 metal ion binding,GO:0004932 mating-type factor pheromone receptor activity	GO:0016021 integral to membrane,GO:0016020 membrane	197.045	1108.53	173.686	1030.75	173.686	537.814	3.09647	1.63062	*		OK	OK
H300020049	H300020049	ENSG00000128585	NM_013255	-	MKLN1	Muskelin [Source:UniProtKB/Swiss-Prot;Acc:Q9UL63]	-	-	-	168.718	939.817	145.359	862.038	145.359	449.787	3.09431	1.62962	*		OK	OK
AHsV10003186	AHsV10003186	-	NM_016009.3	51100	SH3GLB1	Endophilin-B1 (SH3 domain-containing GRB2-like protein B1)(Bax-interacting factor 1)(Bif-1) [Source:UniProtKB/Swiss-Prot;Acc:Q9Y371]	GO:0001844 protein insertion into mitochondrial membrane during induction of apoptosis,GO:0006654 phosphatidic acid biosynthetic process,GO:0006915 apoptosis,GO:0006916 anti-apoptosis,GO:0008654 phospholipid biosynthetic process,GO:0051084 'de novo' postt	GO:0005504 fatty acid binding,GO:0005515 protein binding,GO:0042171 lysophosphatidic acid acyltransferase activity,GO:0042803 protein homodimerization activity	GO:0000139 Golgi membrane,GO:0005737 cytoplasm,GO:0005739 mitochondrion,GO:0005741 mitochondrial outer membrane,GO:0005792 microsome,GO:0005794 Golgi apparatus,GO:0016020 membrane	326.875	1875.01	303.517	1797.23	303.517	937.745	3.0896	1.62742	*		OK	OK
AHsV10000818	AHsV10000818	-	NM_001042437.1	8869	ST3GAL5	Lactosylceramide alpha-2,3-sialyltransferase (EC 2.4.99.9)(CMP-NeuAc:lactosylceramide alpha-2,3-sialyltransferase)(Ganglioside GM3 synthase)(ST3Gal V)(Sialyltransferase 9) [Source:UniProtKB/Swiss-Prot;Acc:Q9UNP4]	GO:0006486 protein amino acid glycosylation	GO:0008373 sialyltransferase activity	GO:0030173 integral to Golgi membrane	860.523	5012.6	837.164	4934.82	837.164	2574.85	3.07568	1.6209	*		OK	OK
AHsV10000711	AHsV10000711	-	NM_032283.1	84243	ZDHHC18	Palmitoyltransferase ZDHHC18 (EC 2.3.1.-)(Zinc finger DHHC domain-containing protein 18)(DHHC-18) [Source:UniProtKB/Swiss-Prot;Acc:Q9NUE0]	-	GO:0005179 hormone activity,GO:0008270 zinc ion binding,GO:0008415 acyltransferase activity,GO:0016740 transferase activity,GO:0046872 metal ion binding	GO:0005576 extracellular region,GO:0016020 membrane,GO:0016021 integral to membrane	124.933	675.398	101.575	597.619	101.575	311.821	3.06986	1.61817	*		OK	OK
H200017432	H200017432	ENSG00000139269	NM_031479	83729	INHBE	Inhibin beta E chain Precursor (Activin beta-E chain) [Source:UniProtKB/Swiss-Prot;Acc:P58166]	-	GO:0008083 growth factor activity,GO:0005179 hormone activity	GO:0005576 extracellular region	357.235	2041.67	333.876	1963.89	333.876	1024.7	3.06911	1.61782	*		OK	OK
H300002412	H300002412	ENSG00000107372	NM_001102421;NM_006007	7763	ZFAND5	AN1-type zinc finger protein 5 (Zinc finger A20 domain-containing protein 2)(Zinc finger protein 216) [Source:UniProtKB/Swiss-Prot;Acc:O76080]	GO:0008150 biological_process	GO:0003677 DNA binding,GO:0008270 zinc ion binding,GO:0046872 metal ion binding,GO:0003674 molecular_function	GO:0005575 cellular_component	365.24	2077.24	341.881	1999.46	341.881	1043.26	3.05153	1.60953	*		OK	OK
H300009457	H300009457	ENSG00000099860	NM_015675	4616	GADD45B	Growth arrest and DNA-damage-inducible protein GADD45 beta (Myeloid differentiation primary response protein MyD118)(Negative growth regulatory protein MyD118) [Source:UniProtKB/Swiss-Prot;Acc:O75293]	GO:0006950 response to stress,GO:0007275 multicellular organismal development,GO:0000185 activation of MAPKKK activity,GO:0030154 cell differentiation,GO:0006915 apoptosis,GO:0006469 negative regulation of protein kinase activity,GO:0051726 regulation of cell cycle,GO:0000186 activation of MAPKK activity	GO:0005515 protein binding	-	140.43	761.409	117.071	683.63	117.071	356.699	3.04685	1.60732	*		OK	OK
CHsGV10003093	CHsGV10003093	-	NM_000927.3	5243	ABCB1	Multidrug resistance protein 1 (EC 3.6.3.44)(ATP-binding cassette sub-family B member 1)(P-glycoprotein 1)(CD243 antigen) [Source:UniProtKB/Swiss-Prot;Acc:P08183]	GO:0042493 response to drug,GO:0005975 carbohydrate metabolic process,GO:0006810 transport,GO:0015833 peptide transport	GO:0005515 protein binding,GO:0005524 ATP binding,GO:0016887 ATPase activity,GO:0005215 transporter activity,GO:0000166 nucleotide binding,GO:0016787 hydrolase activity,GO:0015197 peptide transporter activity,GO:0008559 xenobiotic-transporting ATPase activity,GO:0008974 phosphoribulokinase activity	GO:0005634 nucleus,GO:0016021 integral to membrane,GO:0009986 cell surface,GO:0005624 membrane fraction,GO:0005886 plasma membrane,GO:0016020 membrane,GO:0005925 focal adhesion	256.749	1439.68	233.391	1361.9	233.391	710.602	3.04469	1.60629	*		OK	OK
AHsV10002452	AHsV10002452	-	NM_201437.1	6917	TCEA1	Transcription elongation factor A protein 1 (Transcription elongation factor S-II protein 1)(Transcription elongation factor TFIIS.o) [Source:UniProtKB/Swiss-Prot;Acc:P23193]	GO:0006350 transcription,GO:0006354 RNA elongation,GO:0006355 regulation of transcription, DNA-dependent,GO:0006357 regulation of transcription from RNA polymerase II promoter,GO:0045449 regulation of transcription	GO:0003676 nucleic acid binding,GO:0003677 DNA binding,GO:0003702 RNA polymerase II transcription factor activity,GO:0003711 transcription elongation regulator activity,GO:0003746 translation elongation factor activity,GO:0005515 protein binding,GO:000827	GO:0005634 nucleus	474.449	2703.15	451.09	2625.37	451.09	1369.85	3.03674	1.60253	*		OK	OK
H200004982	H200004982	ENSG00000023287	NM_014781	9821	RB1CC1	RB1-inducible coiled-coil protein 1 [Source:UniProtKB/Swiss-Prot;Acc:Q8TDY2]	GO:0006350 transcription,GO:0006355 regulation of transcription, DNA-dependent,GO:0007507 heart development,GO:0001934 positive regulation of protein amino acid phosphorylation,GO:0045786 negative regulation of cell cycle,GO:0001889 liver development,GO:0007254 JNK cascade,GO:0043066 negative regulation of apoptosis,GO:0045793 positive regulation of cell size	GO:0005515 protein binding	GO:0005634 nucleus	313.153	1760.47	289.794	1682.69	289.794	877.98	3.02967	1.59916	*		OK	OK
H300019079	H300019079	ENSG00000124831	NM_004735;NM_004735	9208	LRRFIP1	Leucine-rich repeat flightless-interacting protein 1 (LRR FLII-interacting protein 1)(TAR RNA-interacting protein)(GC-binding factor 2) [Source:UniProtKB/Swiss-Prot;Acc:Q32MZ4]	GO:0006357 regulation of transcription from RNA polymerase II promoter,GO:0016481 negative regulation of transcription	GO:0003677 DNA binding,GO:0005515 protein binding,GO:0003725 double-stranded RNA binding,GO:0016564 transcription repressor activity	GO:0005634 nucleus,GO:0005856 cytoskeleton,GO:0005737 cytoplasm	206.433	1137.12	183.074	1059.34	183.074	552.735	3.01918	1.59416	*		OK	OK
H200004152	H200004152	ENSG00000151689	NM_002194	3628	INPP1	Inositol polyphosphate 1-phosphatase (IPPase)(IPP)(EC 3.1.3.57) [Source:UniProtKB/Swiss-Prot;Acc:P49441]	GO:0007165 signal transduction,GO:0006796 phosphate metabolic process	GO:0000287 magnesium ion binding,GO:0016787 hydrolase activity,GO:0004437 inositol or phosphatidylinositol phosphatase activity,GO:0031403 lithium ion binding,GO:0004441 inositol-1,4-bisphosphate 1-phosphatase activity	-	183.352	999.523	159.994	921.744	159.994	480.94	3.00599	1.58784	*		OK	OK
H200011511	H200011511	ENSG00000108509	NM_015099	-	CAMTA2	Calmodulin-binding transcription activator 2 [Source:UniProtKB/Swiss-Prot;Acc:O94983]	-	GO:0005199 structural constituent of cell wall	-	331.156	1847.01	307.798	1769.23	307.798	923.134	2.99916	1.58456	*		OK	OK
H200008411	H200008411	ENSG00000154359	NM_152271;NM_152271	91694	LONRF1	LON peptidase N-terminal domain and RING finger protein 1 (RING finger protein 191) [Source:UniProtKB/Swiss-Prot;Acc:Q17RB8]	GO:0016567 protein ubiquitination,GO:0006510 ATP-dependent proteolysis	GO:0005515 protein binding,GO:0008270 zinc ion binding,GO:0046872 metal ion binding,GO:0004842 ubiquitin-protein ligase activity,GO:0004176 ATP-dependent peptidase activity	GO:0000151 ubiquitin ligase complex	132.333	703.224	108.975	625.445	108.975	326.339	2.99464	1.58238	*		OK	OK
H200006251	H200006251	ENSG00000137331	NM_003897;NM_003897	8870	IER3	immediate early response 3 [Source:RefSeq peptide;Acc:NP_003888]	-	-	GO:0005901 caveola,GO:0016600 flotillin complex	1681.51	9557.57	1658.16	9479.79	1658.16	4946.29	2.983	1.57677	*		OK	OK
H200008426	H200008426	ENSG00000139318	NM_022652;NM_022652	1848	DUSP6	Dual specificity protein phosphatase 6 (EC 3.1.3.48)(EC 3.1.3.16)(Mitogen-activated protein kinase phosphatase 3)(MAP kinase phosphatase 3)(MKP-3)(Dual specificity protein phosphatase PYST1) [Source:UniProtKB/Swiss-Prot;Acc:Q16828]	GO:0006470 protein amino acid dephosphorylation,GO:0016311 dephosphorylation	GO:0008138 protein tyrosine/serine/threonine phosphatase activity,GO:0016791 phosphatase activity,GO:0017017 MAP kinase tyrosine/serine/threonine phosphatase activity	-	854.154	4817.72	830.796	4739.95	830.796	2473.17	2.97687	1.5738	*		OK	OK
opHsV0400007546	opHsV0400007546	ENSG00000204157	NM_001013642	388610	C1orf225	Uncharacterized protein LOC388610 [Source:UniProtKB/Swiss-Prot;Acc:Q6NT89]	-	-	-	278.441	1519.38	255.083	1441.6	255.083	752.185	2.94879	1.56012	*		OK	OK
H200019901	H200019901	ENSG00000163683	NM_174921	201895	C4orf34	Uncharacterized protein C4orf34 [Source:UniProtKB/Swiss-Prot;Acc:Q96QK8]	-	GO:0005515 protein binding	GO:0016021 integral to membrane,GO:0016020 membrane	544.588	3018.68	521.23	2940.9	521.23	1534.48	2.94395	1.55776	*		OK	OK
CHsGV10002785	CHsGV10002785	-	NM_001042548.1;NM_005102.2	9637	FEZ2	Fasciculation and elongation protein zeta-2 (Zygin-2)(Zygin II) [Source:UniProtKB/Swiss-Prot;Acc:Q9UHY8]	GO:0007411 axon guidance,GO:0007165 signal transduction,GO:0007399 nervous system development	GO:0005515 protein binding	-	177.011	943.92	153.653	866.141	153.653	451.928	2.94123	1.55642	*		OK	OK
H200008080	H200008080	ENSG00000102401	NM_016607;NM_016607;NM_016607	51566	ARMCX3	Armadillo repeat-containing X-linked protein 3 (Protein ALEX3)(ARM protein lost in epithelial cancers on chromosome X 3) [Source:UniProtKB/Swiss-Prot;Acc:Q9UH62]	-	GO:0005488 binding	GO:0016021 integral to membrane,GO:0016020 membrane,GO:0005634 nucleus,GO:0005856 cytoskeleton,GO:0005737 cytoplasm	215.394	1158.61	192.036	1080.83	192.036	563.948	2.93668	1.55419	*		OK	OK
H200008496	H200008496	ENSG00000169251	NM_015938	51068	NMD3	60S ribosomal export protein NMD3 (hNMD3) [Source:UniProtKB/Swiss-Prot;Acc:Q96D46]	GO:0015031 protein transport	-	GO:0005634 nucleus,GO:0005737 cytoplasm	217.325	1167.11	193.966	1089.34	193.966	568.384	2.93033	1.55106	*		OK	OK
opHsV0400000294	opHsV0400000294	ENSG00000008294	NM_003971;NM_003971;NM_003971	-	SPAG9	C-jun-amino-terminal kinase-interacting protein 4 (JNK-interacting protein 4)(JIP-4)(JNK-associated leucine-zipper protein)(JLP)(Sperm-associated antigen 9)(Mitogen-activated protein kinase 8-interacting protein 4)(Human lung cancer oncogene 6 protein)(HLC-6)(Proliferation-inducing protein 6)(Sperm-specific protein)(Sperm surface protein)(Protein highly expressed in testis)(PHET)(Sunday driver 1)…	-	-	-	202.656	1081.73	179.298	1003.95	179.298	523.831	2.92157	1.54674	*		OK	OK
H200012019	H200012019	ENSG00000198074	NM_020299	441282	AKR1B10	Aldo-keto reductase family 1 member B10 (EC 1.1.1.-)(Aldose reductase-like)(ARL-1)(Aldose reductase-related protein)(ARP)(hARP)(Small intestine reductase)(SI reductase) [Source:UniProtKB/Swiss-Prot;Acc:O60218]	GO:0055114 oxidation reduction,GO:0007586 digestion,GO:0008202 steroid metabolic process,GO:0006081 cellular aldehyde metabolic process	GO:0005515 protein binding,GO:0016491 oxidoreductase activity,GO:0004033 aldo-keto reductase activity	GO:0005737 cytoplasm,GO:0005575 cellular_component	4464.5	24942	4441.14	24864.2	4441.14	12973.4	2.92119	1.54656	*		OK	OK
H200007677	H200007677	ENSG00000062716	NM_030938	81671	TMEM49	Transmembrane protein 49 (Vacuole membrane protein 1) [Source:UniProtKB/Swiss-Prot;Acc:Q96GC9]	-	-	GO:0016021 integral to membrane,GO:0016020 membrane,GO:0005783 endoplasmic reticulum,GO:0033116 ER-Golgi intermediate compartment membrane	1382.45	7678.96	1359.09	7601.18	1359.09	3966.08	2.91819	1.54507	*		OK	OK
H200007060	H200007060	ENSG00000171606	-	10782	ZNF274	Zinc finger protein 274 (Zinc finger protein HFB101)(Zinc finger protein zfp2)(Zf2)(Zinc finger protein with KRAB and SCAN domains 19) [Source:UniProtKB/Swiss-Prot;Acc:Q96GC6]	GO:0006350 transcription,GO:0006355 regulation of transcription, DNA-dependent	GO:0003677 DNA binding,GO:0005515 protein binding,GO:0008270 zinc ion binding,GO:0046872 metal ion binding,GO:0003700 transcription factor activity,GO:0003676 nucleic acid binding,GO:0003714 transcription corepressor activity	GO:0005634 nucleus,GO:0005622 intracellular,GO:0005730 nucleolus	178.314	943.716	154.956	865.937	154.956	451.821	2.91581	1.5439	*		OK	OK
H300014031	H300014031	ENSG00000135968	NM_181453;NM_181453	9648	GCC2	GRIP and coiled-coil domain-containing protein 2 (Golgi coiled-coil protein GCC185)(Ran-binding protein 2-like 4)(RanBP2L4)(CTCL tumor antigen se1-1)(CLL-associated antigen KW-11)(Renal carcinoma antigen NY-REN-53) [Source:UniProtKB/Swiss-Prot;Acc:Q8IWJ2]	-	GO:0005515 protein binding,GO:0000166 nucleotide binding,GO:0042802 identical protein binding	GO:0016020 membrane,GO:0005737 cytoplasm,GO:0005794 Golgi apparatus,GO:0000139 Golgi membrane	223.085	1190.16	199.727	1112.38	199.727	580.408	2.90601	1.53904	*		OK	OK
H200009472	H200009472	ENSG00000162923	NM_025160	80232	WDR26	WD repeat-containing protein 26 (CUL4- and DDB1-associated WDR protein 2)(Myocardial ischemic preconditioning up-regulated protein 2) [Source:UniProtKB/Swiss-Prot;Acc:Q9H7D7]	-	-	GO:0005737 cytoplasm	126.065	649.61	102.707	571.83	102.707	298.365	2.90502	1.53855	*		OK	OK
H300006734	H300006734	ENSG00000117475	NM_003666;NM_003666;NM_003666	-	BLZF1	Golgin-45 (Basic leucine zipper nuclear factor 1)(JEM-1)(p45 basic leucine-zipper nuclear factor) [Source:UniProtKB/Swiss-Prot;Acc:Q9H2G9]	-	-	-	124.205	636.865	100.847	559.086	100.847	291.715	2.89266	1.5324	*		OK	OK
opHsV0400005344	opHsV0400005344	ENSG00000101745	NM_001083625;NM_001083625	23253	ANKRD12	Ankyrin repeat domain-containing protein 12 (Ankyrin repeat-containing cofactor 2)(GAC-1 protein) [Source:UniProtKB/Swiss-Prot;Acc:Q6UB98]	-	-	-	324.95	1746.86	301.592	1669.09	301.592	870.881	2.88762	1.52988	*		OK	OK
DHsGV10003017	DHsGV10003017	-	-	100128916	-	-	-	-	-	531.153	2885.57	507.794	2807.79	507.794	1465.02	2.88508	1.52861	*		OK	OK
H200019059	H200019059	ENSG00000138760	NM_005506	950	SCARB2	Lysosome membrane protein 2 (Lysosome membrane protein II)(LIMP II)(Scavenger receptor class B member 2)(85 kDa lysosomal membrane sialoglycoprotein)(LGP85)(CD36 antigen-like 2)(CD36 antigen) [Source:UniProtKB/Swiss-Prot;Acc:Q14108]	GO:0007155 cell adhesion	GO:0005515 protein binding,GO:0004872 receptor activity	GO:0016020 membrane,GO:0005624 membrane fraction,GO:0005887 integral to plasma membrane,GO:0005764 lysosome,GO:0005765 lysosomal membrane	136.543	695.494	113.185	617.715	113.185	322.306	2.84761	1.50975	*		OK	OK
AHsV10000801	AHsV10000801	-	NM_006521.3	7030	TFE3	Transcription factor E3 [Source:UniProtKB/Swiss-Prot;Acc:P19532]	GO:0006412 translation,GO:0006418 tRNA aminoacylation for protein translation,GO:0045449 regulation of transcription,GO:0045670 regulation of osteoclast differentiation,GO:0045893 positive regulation of transcription, DNA-dependent	GO:0000166 nucleotide binding,GO:0003700 transcription factor activity,GO:0004812 aminoacyl-tRNA ligase activity,GO:0005515 protein binding,GO:0005524 ATP binding,GO:0030528 transcription regulator activity	GO:0005634 nucleus,GO:0005737 cytoplasm	168.582	861.568	145.224	783.789	145.224	408.959	2.81606	1.49368	*		OK	OK
AHsV10000057	AHsV10000057	-	NM_005026.3	5293	PIK3CD	Phosphatidylinositol-4,5-bisphosphate 3-kinase catalytic subunit delta isoform (EC 2.7.1.153)(PI3-kinase p110 subunit delta)(PtdIns-3-kinase p110)(PI3K)(p110delta) [Source:UniProtKB/Swiss-Prot;Acc:O00329]	GO:0006468 protein amino acid phosphorylation,GO:0007165 signal transduction,GO:0046854 phosphoinositide phosphorylation,GO:0048015 phosphoinositide-mediated signaling	GO:0004428 inositol or phosphatidylinositol kinase activity,GO:0005515 protein binding,GO:0016303 1-phosphatidylinositol-3-kinase activity,GO:0016740 transferase activity,GO:0016773 phosphotransferase activity, alcohol group as acceptor,GO:0046934 phospha	GO:0005942 phosphoinositide 3-kinase complex	253.121	1315.23	229.762	1237.45	229.762	645.664	2.81014	1.49064	*		OK	OK
H300006654	H300006654	ENSG00000177410	-	-	C20orf199	Uncharacterized protein C20orf199 [Source:UniProtKB/Swiss-Prot;Acc:Q5QHF1]	-	-	-	4498.1	24133.9	4474.74	24056.1	4474.74	12551.8	2.80503	1.48802	*		OK	OK
opHsV0400005617	opHsV0400005617	ENSG00000115306	NM_178313;NM_178313	6711	SPTBN1	Spectrin beta chain, brain 1 (Spectrin, non-erythroid beta chain 1)(Beta-II spectrin)(Fodrin beta chain) [Source:UniProtKB/Swiss-Prot;Acc:Q01082]	GO:0051016 barbed-end actin filament capping,GO:0007184 SMAD protein nuclear translocation,GO:0007182 common-partner SMAD protein phosphorylation	GO:0003779 actin binding,GO:0005516 calmodulin binding,GO:0005200 structural constituent of cytoskeleton	GO:0005886 plasma membrane,GO:0005634 nucleus,GO:0005856 cytoskeleton,GO:0005737 cytoplasm,GO:0005730 nucleolus,GO:0008091 spectrin	1138.64	6055.33	1115.28	5977.55	1115.28	3118.92	2.79652	1.48363	*		OK	OK
AHsV10001471	AHsV10001471	-	NM_013275.4	29123	ANKRD11	Ankyrin repeat domain-containing protein 11 (Ankyrin repeat-containing cofactor 1) [Source:UniProtKB/Swiss-Prot;Acc:Q6UB99]	-	-	GO:0005634 nucleus	456.06	2394.42	432.701	2316.64	432.701	1208.76	2.79351	1.48208	*		OK	OK
H300009441	H300009441	ENSG00000128585	NM_013255	4289	MKLN1	Muskelin [Source:UniProtKB/Swiss-Prot;Acc:Q9UL63]	GO:0007165 signal transduction	GO:0005515 protein binding	GO:0005737 cytoplasm	170.024	862.935	146.665	785.156	146.665	409.672	2.79325	1.48194	*		OK	OK
AHsV10001069	AHsV10001069	-	NM_018999.2	54462	KIAA1128	Protein GCAP14 homolog [Source:UniProtKB/Swiss-Prot;Acc:Q9H7U1]	-	-	-	145.075	728.592	121.717	650.813	121.717	339.576	2.78989	1.48021	*		OK	OK
CHsGV10002708	CHsGV10002708	-	NM_005667.2	7844	RNF103	RING finger protein 103 (Zinc finger protein 103 homolog)(Zfp-103)(KF-1)(hKF-1) [Source:UniProtKB/Swiss-Prot;Acc:O00237]	GO:0007417 central nervous system development	GO:0005515 protein binding,GO:0008270 zinc ion binding,GO:0046872 metal ion binding	GO:0016021 integral to membrane,GO:0016020 membrane	131.308	652.625	107.95	574.846	107.95	299.938	2.7785	1.47431	*		OK	OK
AHsV10002240	AHsV10002240	-	NM_006513.2	6301	SARS	Seryl-tRNA synthetase, cytoplasmic (EC 6.1.1.11)(Seryl-tRNA(Ser/Sec) synthetase)(Serine--tRNA ligase)(SerRS) [Source:UniProtKB/Swiss-Prot;Acc:P49591]	GO:0006412 translation,GO:0006418 tRNA aminoacylation for protein translation,GO:0006434 seryl-tRNA aminoacylation,GO:0008033 tRNA processing	GO:0000166 nucleotide binding,GO:0003723 RNA binding,GO:0004812 aminoacyl-tRNA ligase activity,GO:0004828 serine-tRNA ligase activity,GO:0005515 protein binding,GO:0005524 ATP binding,GO:0016874 ligase activity	GO:0005737 cytoplasm	731.97	3847.37	708.611	3769.6	708.611	1966.87	2.77567	1.47283	*		OK	OK
AHsV10000752	AHsV10000752	-	NM_020299.4	57016	AKR1B10	Aldo-keto reductase family 1 member B10 (EC 1.1.1.-)(Aldose reductase-like)(ARL-1)(Aldose reductase-related protein)(ARP)(hARP)(Small intestine reductase)(SI reductase) [Source:UniProtKB/Swiss-Prot;Acc:O60218]	GO:0006081 cellular aldehyde metabolic process,GO:0007586 digestion,GO:0008202 steroid metabolic process,GO:0055114 oxidation reduction	GO:0004033 aldo-keto reductase activity,GO:0005515 protein binding,GO:0016491 oxidoreductase activity	GO:0005575 cellular_component,GO:0005737 cytoplasm	5547.65	29443.2	5524.29	29365.4	5524.29	15322	2.77358	1.47175	*		OK	OK
CHsGV10000752	CHsGV10000752	-	NM_015525.2	25998	IBTK	Inhibitor of Bruton tyrosine kinase (IBtk) [Source:UniProtKB/Swiss-Prot;Acc:Q9P2D0]	GO:0051209 release of sequestered calcium ion into cytosol,GO:0001933 negative regulation of protein amino acid phosphorylation	GO:0005515 protein binding,GO:0019901 protein kinase binding,GO:0030292 protein tyrosine kinase inhibitor activity	GO:0005737 cytoplasm,GO:0016020 membrane	132.483	654.619	109.125	576.84	109.125	300.979	2.75811	1.46368	*		OK	OK
H200011726	H200011726	ENSG00000116954	NM_022157	64121	RRAGC	Ras-related GTP-binding protein C (Rag C)(RagC)(GTPase-interacting protein 2)(TIB929) [Source:UniProtKB/Swiss-Prot;Acc:Q9HB90]	GO:0006350 transcription,GO:0007186 G-protein coupled receptor protein signaling pathway,GO:0006810 transport,GO:0006915 apoptosis,GO:0007264 small GTPase mediated signal transduction,GO:0008380 RNA splicing,GO:0016049 cell growth	GO:0000287 magnesium ion binding,GO:0005515 protein binding,GO:0000166 nucleotide binding,GO:0005525 GTP binding,GO:0003924 GTPase activity,GO:0005215 transporter activity,GO:0004871 signal transducer activity,GO:0008289 lipid binding,GO:0046982 protein heterodimerization activity,GO:0019003 GDP binding,GO:0019001 guanyl nucleotide binding	GO:0005634 nucleus,GO:0005737 cytoplasm	230.447	1171.58	207.089	1093.8	207.089	570.713	2.75589	1.46252	*		OK	OK
CHsGV10002633	CHsGV10002633	-	NM_001113182,NM_005104	6046	BRD2	Bromodomain-containing protein 2 (Protein RING3)(O27.1.1) [Source:UniProtKB/Swiss-Prot;Acc:P25440]	GO:0007283 spermatogenesis	GO:0004674 protein serine/threonine kinase activity	GO:0005737 cytoplasm,GO:0005634 nucleus	482.107	2499.49	458.748	2421.71	458.748	1263.58	2.75441	1.46174	*		OK	OK
AHsV10000913	AHsV10000913	-	NM_001981.2	2060	EPS15	Epidermal growth factor receptor substrate 15 (Protein Eps15)(Protein AF-1p) [Source:UniProtKB/Swiss-Prot;Acc:P42566]	GO:0007173 epidermal growth factor receptor signaling pathway,GO:0008283 cell proliferation,GO:0015031 protein transport,GO:0016050 vesicle organization	GO:0005509 calcium ion binding,GO:0005515 protein binding,GO:0017124 SH3 domain binding	GO:0005737 cytoplasm,GO:0005768 endosome,GO:0005829 cytosol,GO:0005886 plasma membrane,GO:0005905 coated pit,GO:0031901 early endosome membrane	438.848	2262.6	415.49	2184.82	415.49	1139.98	2.7437	1.45612	*		OK	OK
H200007979	H200007979	ENSG00000142627	NM_004431;NM_004431	1969	EPHA2	Ephrin type-A receptor 2 Precursor (EC 2.7.10.1)(Tyrosine-protein kinase receptor ECK)(Epithelial cell kinase) [Source:UniProtKB/Swiss-Prot;Acc:P29317]	GO:0007165 signal transduction,GO:0006468 protein amino acid phosphorylation,GO:0007275 multicellular organismal development,GO:0007169 transmembrane receptor protein tyrosine kinase signaling pathway,GO:0030182 neuron differentiation,GO:0048013 ephrin receptor signaling pathway	GO:0016740 transferase activity,GO:0000166 nucleotide binding,GO:0005524 ATP binding,GO:0004872 receptor activity,GO:0004674 protein serine/threonine kinase activity,GO:0004713 protein tyrosine kinase activity,GO:0004672 protein kinase activity,GO:0005003 ephrin receptor activity	GO:0016021 integral to membrane,GO:0016020 membrane,GO:0005887 integral to plasma membrane	378.84	1946.33	355.481	1868.55	355.481	974.956	2.74264	1.45556	*		OK	OK
H200008439	H200008439	ENSG00000154265	NM_018672;NM_018672;NM_018672	-	ABCA5	ATP-binding cassette sub-family A member 5 [Source:UniProtKB/Swiss-Prot;Acc:Q8WWZ7]	-	GO:0000166 nucleotide binding,GO:0005524 ATP binding,GO:0017111 nucleoside-triphosphatase activity,GO:0016887 ATPase activity	-	142.395	702.639	119.037	624.86	119.037	326.034	2.73894	1.45362	*		OK	OK
CHsGV10003931	CHsGV10003931	-	NM_025147.3	80219	COQ10B	Protein COQ10 B, mitochondrial Precursor [Source:UniProtKB/Swiss-Prot;Acc:Q9H8M1]	-	-	GO:0005739 mitochondrion	252.814	1281.66	229.456	1203.88	229.456	628.152	2.73757	1.4529	*		OK	OK
H200009362	H200009362	ENSG00000155304	NM_006948	6782	STCH	Heat shock 70 kDa protein 13 Precursor (Stress 70 protein chaperone microsome-associated 60 kDa protein)(Microsomal stress 70 protein ATPase core) [Source:UniProtKB/Swiss-Prot;Acc:P48723]	-	GO:0000166 nucleotide binding,GO:0005524 ATP binding	GO:0005792 microsome,GO:0005783 endoplasmic reticulum	338.892	1731.7	315.533	1653.92	315.533	862.968	2.73495	1.45151	*		OK	OK
H300018924	H300018924	ENSG00000040487	NM_017765;NM_017765;NM_017765;NM_017765	54896	PQLC2	PQ-loop repeat-containing protein 2 [Source:UniProtKB/Swiss-Prot;Acc:Q6ZP29]	-	-	-	201.049	1005.5	177.69	927.721	177.69	484.058	2.72417	1.44582	*		OK	OK
AHsV10003588	AHsV10003588	-	NM_005534.3	3460	IFNGR2	Interferon-gamma receptor beta chain Precursor (Interferon-gamma receptor accessory factor 1)(AF-1)(Interferon-gamma transducer 1) [Source:UniProtKB/Swiss-Prot;Acc:P38484]	GO:0007166 cell surface receptor linked signal transduction,GO:0009615 response to virus	GO:0004872 receptor activity,GO:0004906 interferon-gamma receptor activity	GO:0005783 endoplasmic reticulum,GO:0005886 plasma membrane,GO:0005887 integral to plasma membrane	528.156	2711.13	504.798	2633.35	504.798	1374.01	2.7219	1.44461	*		OK	OK
H300003972	H300003972	ENSG00000160211	NM_001042351;NM_001042351;NM_001042351	2539	G6PD	Glucose-6-phosphate 1-dehydrogenase (G6PD)(EC 1.1.1.49) [Source:UniProtKB/Swiss-Prot;Acc:P11413]	GO:0005975 carbohydrate metabolic process,GO:0008152 metabolic process,GO:0006629 lipid metabolic process,GO:0006006 glucose metabolic process,GO:0055114 oxidation reduction,GO:0006979 response to oxidative stress,GO:0043249 erythrocyte maturation,GO:0040014 regulation of multicellular organism growth,GO:0006749 glutathione metabolic process,GO:0006695 cholesterol biosynthetic process,GO:0001998 …	GO:0005488 binding,GO:0003824 catalytic activity,GO:0016491 oxidoreductase activity,GO:0042803 protein homodimerization activity,GO:0050661 NADP binding,GO:0005536 glucose binding,GO:0004345 glucose-6-phosphate dehydrogenase activity	GO:0005737 cytoplasm,GO:0005829 cytosol,GO:0005813 centrosome,GO:0043231 intracellular membrane-bounded organelle,GO:0009898 internal side of plasma membrane	763.931	3938.38	740.572	3860.6	740.572	2014.35	2.71999	1.4436	*		OK	OK
AHsV10002653	AHsV10002653	-	NM_005113.2	9950	GOLGA5	Golgin subfamily A member 5 (Golgin-84)(RET-fused gene 5 protein)(Ret-II protein) [Source:UniProtKB/Swiss-Prot;Acc:Q8TBA6]	GO:0006468 protein amino acid phosphorylation,GO:0007030 Golgi organization,GO:0048193 Golgi vesicle transport	GO:0004713 protein tyrosine kinase activity,GO:0005515 protein binding,GO:0005524 ATP binding,GO:0017137 Rab GTPase binding,GO:0042803 protein homodimerization activity	GO:0000139 Golgi membrane,GO:0005794 Golgi apparatus,GO:0005801 cis-Golgi network,GO:0016020 membrane,GO:0016021 integral to membrane,GO:0031985 Golgi cisterna	162.102	800.066	138.743	722.286	138.743	376.869	2.71631	1.44165	*		OK	OK
H300021036	H300021036	ENSG00000166012	NM_024116	-	TAF1D	Protein JOSD3 [Source:UniProtKB/Swiss-Prot;Acc:Q9H5J8]	-	-	-	316.266	1601.14	292.907	1523.36	292.907	794.846	2.71365	1.44023	*		OK	OK
opHsV0400004495	opHsV0400004495	ENSG00000197382	-	-	AP000476.2	-	-	-	-	589.704	3022.43	566.346	2944.65	566.346	1536.43	2.71289	1.43983	*		OK	OK
opHsV0400001568	opHsV0400001568	ENSG00000184014	NM_015213	23258	DENND5A	DENN domain-containing protein 5A (Rab6-interacting protein 1)(Rab6IP1) [Source:UniProtKB/Swiss-Prot;Acc:Q6IQ26]	-	GO:0005515 protein binding,GO:0017137 Rab GTPase binding	-	183.433	908.768	160.075	830.989	160.075	433.586	2.70865	1.43757	*		OK	OK
H200004867	H200004867	ENSG00000034677	NM_015435	25897	RNF19A	E3 ubiquitin-protein ligase RNF19A (EC 6.3.2.-)(RING finger protein 19A)(Double ring-finger protein)(Dorfin)(p38) [Source:UniProtKB/Swiss-Prot;Acc:Q9NV58]	GO:0006511 ubiquitin-dependent protein catabolic process,GO:0006464 protein modification process,GO:0000226 microtubule cytoskeleton organization and biogenesis	GO:0005515 protein binding,GO:0008270 zinc ion binding,GO:0046872 metal ion binding,GO:0016874 ligase activity,GO:0008134 transcription factor binding	GO:0016021 integral to membrane,GO:0016020 membrane,GO:0005813 centrosome	208.378	1038.06	185.02	960.28	185.02	501.047	2.70807	1.43727	*		OK	OK
H200000946	H200000946	ENSG00000031698	NM_006513	-	SARS	Seryl-tRNA synthetase, cytoplasmic (EC 6.1.1.11)(Seryl-tRNA(Ser/Sec) synthetase)(Serine--tRNA ligase)(SerRS) [Source:UniProtKB/Swiss-Prot;Acc:P49591]	GO:0006412 translation,GO:0006434 seryl-tRNA aminoacylation,GO:0006418 tRNA aminoacylation for protein translation	GO:0000166 nucleotide binding,GO:0005524 ATP binding,GO:0004812 aminoacyl-tRNA ligase activity,GO:0004828 serine-tRNA ligase activity	GO:0005737 cytoplasm	557.071	2846.53	533.713	2768.75	533.713	1444.65	2.7068	1.43659	*		OK	OK
CHsGV10001927	CHsGV10001927	-	NM_001042483.1;NM_012385.2	26471	NUPR1	Nuclear protein 1 (Protein p8)(Candidate of metastasis 1) [Source:UniProtKB/Swiss-Prot;Acc:O60356]	GO:0006917 induction of apoptosis,GO:0048147 negative regulation of fibroblast proliferation,GO:0009636 response to toxin,GO:0016049 cell growth,GO:0002526 acute inflammatory response	GO:0003674 molecular_function	GO:0005634 nucleus	645.257	3294.92	621.898	3217.15	621.898	1678.62	2.69918	1.43252	*		OK	OK
H200011517	H200011517	ENSG00000080822	NM_019895;NM_001040200;NM_001040200	56650	CLDND1	Claudin domain-containing protein 1 (Membrane protein GENX-3745) [Source:UniProtKB/Swiss-Prot;Acc:Q9NY35]	-	-	GO:0016021 integral to membrane,GO:0016020 membrane	365.077	1845.23	341.718	1767.45	341.718	922.205	2.69873	1.43228	*		OK	OK
AHsV10001899	AHsV10001899	-	NM_002056.2	2673	GFPT1	Glucosamine--fructose-6-phosphate aminotransferase [isomerizing] 1 (EC 2.6.1.16)(Glutamine:fructose 6 phosphate amidotransferase 1)(GFAT 1)(GFAT1)(D-fructose-6-phosphate amidotransferase 1)(Hexosephosphate aminotransferase 1) [Source:UniProtKB/Swiss-Prot;	GO:0005975 carbohydrate metabolic process,GO:0008152 metabolic process,GO:0016051 carbohydrate biosynthetic process	GO:0004360 glutamine-fructose-6-phosphate transaminase (isomerizing) activity,GO:0005529 sugar binding	GO:0005737 cytoplasm	573.239	2917.27	549.881	2839.49	549.881	1481.57	2.69434	1.42993	*		OK	OK
H300012914	H300012914	ENSG00000198814	NM_000167;NM_000167;NM_000167;NM_000167	2710	GK	Glycerol kinase (EC 2.7.1.30)(ATP:glycerol 3-phosphotransferase)(Glycerokinase)(GK) [Source:UniProtKB/Swiss-Prot;Acc:P32189]	GO:0005975 carbohydrate metabolic process,GO:0006072 glycerol-3-phosphate metabolic process	GO:0004370 glycerol kinase activity,GO:0016773 phosphotransferase activity, alcohol group as acceptor	-	293.367	1471.56	270.008	1393.78	270.008	727.233	2.69337	1.42941	*		OK	OK
H300001604	H300001604	ENSG00000104714	NM_207332	157697	ERICH1	Glutamate-rich protein 1 [Source:UniProtKB/Swiss-Prot;Acc:Q86X53]	-	-	GO:0005634 nucleus,GO:0005737 cytoplasm,GO:0005739 mitochondrion	232.64	1155.48	209.282	1077.7	209.282	562.314	2.68688	1.42593	*		OK	OK
AHsV10001183	AHsV10001183	-	NM_001143888.1	55108	BSDC1	BSD domain-containing protein 1 [Source:UniProtKB/Swiss-Prot;Acc:Q9NW68]	-	-	-	290.644	1452.99	267.286	1375.21	267.286	717.546	2.68457	1.42469	*		OK	OK
H300017766	H300017766	ENSG00000115919	NM_003937	8942	KYNU	Kynureninase (EC 3.7.1.3)(L-kynurenine hydrolase) [Source:UniProtKB/Swiss-Prot;Acc:Q16719]	GO:0008152 metabolic process,GO:0009435 NAD biosynthetic process,GO:0034341 response to interferon-gamma,GO:0006569 tryptophan catabolic process,GO:0019805 quinolinate biosynthetic process,GO:0034516 response to vitamin B6,GO:0043420 anthranilate metabolic process	GO:0016787 hydrolase activity,GO:0030170 pyridoxal phosphate binding,GO:0042803 protein homodimerization activity,GO:0030429 kynureninase activity	GO:0005737 cytoplasm,GO:0005829 cytosol,GO:0005739 mitochondrion,GO:0005625 soluble fraction	1424.83	7271.06	1401.47	7193.28	1401.47	3753.25	2.67808	1.4212	*		OK	OK
AHsV10000134	AHsV10000134	-	NM_001042465.1	5660	PSAP	Proactivator polypeptide Precursor [Contains Saposin-A(Protein A);Saposin-B-Val;Saposin-B(Sphingolipid activator protein 1)(SAP-1)(Cerebroside sulfate activator)(CSAct)(Dispersin)(Sulfatide/GM1 activator);Saposin-C(Co-beta-glucosidase)(A1 activator)(Gluco	GO:0006629 lipid metabolic process,GO:0006665 sphingolipid metabolic process	-	GO:0005764 lysosome	1251.53	6379.17	1228.17	6301.39	1228.17	3287.89	2.67705	1.42065	*		OK	OK
H200016772	H200016772	ENSG00000069956	NM_002748;NM_002748	5597	MAPK6	Mitogen-activated protein kinase 6 (EC 2.7.11.24)(Extracellular signal-regulated kinase 3)(ERK-3)(MAP kinase isoform p97)(p97-MAPK) [Source:UniProtKB/Swiss-Prot;Acc:Q16659]	GO:0007165 signal transduction,GO:0006468 protein amino acid phosphorylation,GO:0007049 cell cycle	GO:0016740 transferase activity,GO:0000166 nucleotide binding,GO:0005524 ATP binding,GO:0004674 protein serine/threonine kinase activity,GO:0004713 protein tyrosine kinase activity,GO:0004672 protein kinase activity,GO:0004707 MAP kinase activity	-	598.791	3015.41	575.433	2937.63	575.433	1532.77	2.66369	1.41343	*		OK	OK
CHsGV10000347	CHsGV10000347	-	NM_001006945.1;NM_018372.3	55791	C1orf103	Uncharacterized protein C1orf103 (Receptor-interacting factor 1) [Source:UniProtKB/Swiss-Prot;Acc:Q5T3J3]	-	GO:0005515 protein binding	-	139.398	669.959	116.039	592.18	116.039	308.983	2.66274	1.41291	*		OK	OK
H200006950	H200006950	ENSG00000175482	NM_021173	57804	POLD4	DNA polymerase delta subunit 4 (DNA polymerase delta subunit p12) [Source:UniProtKB/Swiss-Prot;Acc:Q9HCU8]	GO:0006260 DNA replication,GO:0001938 positive regulation of endothelial cell proliferation,GO:0006297 nucleotide-excision repair, DNA gap filling	GO:0016740 transferase activity,GO:0005515 protein binding,GO:0016779 nucleotidyltransferase activity,GO:0003887 DNA-directed DNA polymerase activity	GO:0005634 nucleus,GO:0005654 nucleoplasm	207.918	1019.46	184.56	941.681	184.56	491.342	2.66224	1.41264	*		OK	OK
opHsV0400000267	opHsV0400000267	ENSG00000137193	NM_002648	5292	PIM1	Proto-oncogene serine/threonine-protein kinase Pim-1 (EC 2.7.11.1) [Source:UniProtKB/Swiss-Prot;Acc:P11309]	GO:0006468 protein amino acid phosphorylation	GO:0005524 ATP binding,GO:0004674 protein serine/threonine kinase activity,GO:0004713 protein tyrosine kinase activity,GO:0004672 protein kinase activity	-	187.922	917.342	164.564	839.563	164.564	438.06	2.66195	1.41248	*		OK	OK
opHsV0400000303	opHsV0400000303	ENSG00000070770	NM_001896	1459	CSNK2A2	Casein kinase II subunit alpha' (CK II)(EC 2.7.11.1) [Source:UniProtKB/Swiss-Prot;Acc:P19784]	GO:0006468 protein amino acid phosphorylation,GO:0016055 Wnt receptor signaling pathway,GO:0051726 regulation of cell cycle	GO:0016740 transferase activity,GO:0000166 nucleotide binding,GO:0005524 ATP binding,GO:0004674 protein serine/threonine kinase activity,GO:0004713 protein tyrosine kinase activity,GO:0004672 protein kinase activity,GO:0047485 protein N-terminus binding	-	456.977	2288.22	433.618	2210.44	433.618	1153.34	2.65981	1.41132	*		OK	OK
H200005165	H200005165	ENSG00000139648	NM_033448	112802	KRT71	Keratin, type II cytoskeletal 71 (Cytokeratin-71)(CK-71)(Keratin-71)(K71)(Type II keratin-34)(Type II inner root sheath-specific keratin-K6irs1)(Keratin 6 irs)(hK6irs)(hK6irs1) [Source:UniProtKB/Swiss-Prot;Acc:Q3SY84]	GO:0031069 hair follicle morphogenesis	GO:0005198 structural molecule activity	GO:0045095 keratin filament	409.856	2048	386.497	1970.22	386.497	1028.01	2.65981	1.41132	*		OK	OK
H300003033	H300003033	ENSG00000165476	-	-	REEP3	Receptor expression-enhancing protein 3 [Source:UniProtKB/Swiss-Prot;Acc:Q6NUK4]	-	-	-	210.717	1032.54	187.359	954.764	187.359	498.169	2.6589	1.41083	*		OK	OK
H200013699	H200013699	ENSG00000115170	NM_001105;NM_001105	90	ACVR1	Activin receptor type-1 Precursor (EC 2.7.11.30)(Activin receptor type I)(ACTR-I)(Serine/threonine-protein kinase receptor R1)(SKR1)(Activin receptor-like kinase 2)(ALK-2)(TGF-B superfamily receptor type I)(TSR-I) [Source:UniProtKB/Swiss-Prot;Acc:Q04771]	GO:0006468 protein amino acid phosphorylation,GO:0001701 in utero embryonic development,GO:0009790 embryonic development,GO:0007498 mesoderm development,GO:0001569 patterning of blood vessels,GO:0007507 heart development,GO:0007179 transforming growth factor beta receptor signaling pathway,GO:0045941 positive regulation of transcription,GO:0000082 G1/S transition of mitotic cell cycle,GO:0030509 …	GO:0016740 transferase activity,GO:0000287 magnesium ion binding,GO:0000166 nucleotide binding,GO:0005524 ATP binding,GO:0030145 manganese ion binding,GO:0004872 receptor activity,GO:0004674 protein serine/threonine kinase activity,GO:0004713 protein tyrosine kinase activity,GO:0042803 protein homodimerization activity,GO:0004672 protein kinase activity,GO:0005024 transforming growth factor beta …	GO:0016020 membrane,GO:0045177 apical part of cell,GO:0048179 activin receptor complex	158.352	764.718	134.994	686.939	134.994	358.425	2.65513	1.40878	*		OK	OK
CHsGV10000121	CHsGV10000121	-	NM_014220.2	4071	TM4SF1	Transmembrane 4 L6 family member 1 (Tumor-associated antigen L6)(Membrane component surface marker 1)(M3S1) [Source:UniProtKB/Swiss-Prot;Acc:P30408]	GO:0008150 biological_process	GO:0003674 molecular_function	GO:0016021 integral to membrane,GO:0005887 integral to plasma membrane,GO:0016020 membrane	6666.16	33836	6642.8	33758.2	6642.8	17614.1	2.6516	1.40686	*		OK	OK
AHsV10000589	AHsV10000589	-	NM_003898.2	8871	SYNJ2	Synaptojanin-2 (EC 3.1.3.36)(Synaptic inositol-1,4,5-trisphosphate 5-phosphatase 2) [Source:UniProtKB/Swiss-Prot;Acc:O15056]	GO:0016311 dephosphorylation	GO:0003676 nucleic acid binding,GO:0003723 RNA binding,GO:0004437 inositol or phosphatidylinositol phosphatase activity,GO:0004439 phosphatidylinositol-4,5-bisphosphate 5-phosphatase activity,GO:0005515 protein binding,GO:0016787 hydrolase activity	GO:0016020 membrane	312.32	1539.13	288.962	1461.35	288.962	762.49	2.63872	1.39984	*		OK	OK
H300005845	H300005845	ENSG00000214289	-	-	RPL39P5	Putative 60S ribosomal protein L39-like 5 (60 ribosomal protein L39 pseudogene 5) [Source:UniProtKB/Swiss-Prot;Acc:Q59GN2]	GO:0006412 translation	GO:0003735 structural constituent of ribosome	GO:0005622 intracellular,GO:0005840 ribosome	541.84	2698.66	518.481	2620.89	518.481	1367.5	2.63752	1.39918	*		OK	OK
H300005985	H300005985	ENSG00000106610	NM_022906	64940	STAG3L4	STAG3-like protein 4 (Stromal antigen 3-like protein 4) [Source:UniProtKB/Swiss-Prot;Acc:Q8TBR4]	-	-	-	161.799	777.021	138.441	699.242	138.441	364.845	2.63539	1.39802	*		OK	OK
H300003673	H300003673	ENSG00000135269	NM_152829;NM_152829;NM_152829;NM_152829	26136	TES	Testin (TESS) [Source:UniProtKB/Swiss-Prot;Acc:Q9UGI8]	-	GO:0008270 zinc ion binding	-	205.37	996.866	182.012	919.086	182.012	479.553	2.63474	1.39766	*		OK	OK
H200002332	H200002332	ENSG00000133398	NM_032286	84246	MED10	Mediator of RNA polymerase II transcription subunit 10 (Mediator complex subunit 10)(Transformation-related gene 17 protein)(TRG-17)(Transformation-related gene 20 protein)(TRG-20) [Source:UniProtKB/Swiss-Prot;Acc:Q9BTT4]	GO:0006350 transcription,GO:0006355 regulation of transcription, DNA-dependent	-	GO:0005634 nucleus	358.685	1757.42	335.327	1679.64	335.327	876.388	2.61354	1.386	*		OK	OK
H200004585	H200004585	ENSG00000198839	NM_021994	11179	ZNF277P	Zinc finger protein 277 [Source:UniProtKB/Swiss-Prot;Acc:Q9NRM2]	GO:0006350 transcription,GO:0006355 regulation of transcription, DNA-dependent	GO:0003677 DNA binding,GO:0005515 protein binding,GO:0008270 zinc ion binding,GO:0046872 metal ion binding,GO:0003700 transcription factor activity,GO:0003676 nucleic acid binding,GO:0004872 receptor activity	GO:0005634 nucleus,GO:0005622 intracellular	280.919	1361.61	257.56	1283.83	257.56	669.865	2.60081	1.37896	*		OK	OK
opHsV0400000855	opHsV0400000855	ENSG00000079950	NM_003569;NM_003569	8417	STX7	Syntaxin-7 [Source:UniProtKB/Swiss-Prot;Acc:O15400]	GO:0006886 intracellular protein transport,GO:0006892 post-Golgi vesicle-mediated transport,GO:0016192 vesicle-mediated transport	GO:0005515 protein binding,GO:0005484 SNAP receptor activity	GO:0016021 integral to membrane,GO:0016020 membrane,GO:0005768 endosome,GO:0031901 early endosome membrane	207.375	994.307	184.016	916.528	184.016	478.218	2.59878	1.37783	*		OK	OK
opHsV0400006722	opHsV0400006722	ENSG00000165997	NM_178815	221079	ARL5B	ADP-ribosylation factor-like protein 5B (ADP-ribosylation factor-like protein 8) [Source:UniProtKB/Swiss-Prot;Acc:Q96KC2]	GO:0015031 protein transport,GO:0007264 small GTPase mediated signal transduction,GO:0006886 intracellular protein transport	GO:0000166 nucleotide binding,GO:0005525 GTP binding,GO:0003924 GTPase activity	GO:0005622 intracellular	132.557	619.404	109.199	541.625	109.199	282.605	2.58798	1.37183	*		OK	OK
H300022884	H300022884	ENSG00000189050	NM_016125	-	RNFT1	RING finger and transmembrane domain-containing protein 1 (Protein PTD016) [Source:UniProtKB/Swiss-Prot;Acc:Q5M7Z0]	-	-	-	246.742	1185.68	223.384	1107.9	223.384	578.071	2.58779	1.37172	*		OK	OK
H300022277	H300022277	ENSG00000214021	NM_001025930;NM_001025930;NM_001025930;NM_001025930	26140	TTLL3	Actin-related protein 2/3 complex subunit 4 (Arp2/3 complex 20 kDa subunit)(p20-ARC) [Source:UniProtKB/Swiss-Prot;Acc:P59998]	GO:0006464 protein modification process	GO:0004835 tubulin-tyrosine ligase activity	-	139.976	656.103	116.618	578.324	116.618	301.753	2.58754	1.37158	*		OK	OK
H300021323	H300021323	ENSG00000168495	NM_001722;NM_001722	661	POLR3D	DNA-directed RNA polymerase III subunit RPC4 (RNA polymerase III subunit C4)(DNA-directed RNA polymerase III subunit D)(DNA-directed RNA polymerase III 47 kDa polypeptide)(RPC53)(Protein BN51) [Source:UniProtKB/Swiss-Prot;Acc:P05423]	GO:0006350 transcription,GO:0006383 transcription from RNA polymerase III promoter	GO:0003677 DNA binding,GO:0003899 DNA-directed RNA polymerase activity	GO:0005634 nucleus,GO:0005666 DNA-directed RNA polymerase III complex	253.615	1218.92	230.257	1141.14	230.257	595.414	2.58587	1.37065	*		OK	OK
H200003999	H200003999	ENSG00000136643	NM_012424	26750	RPS6KC1	Ribosomal protein S6 kinase delta-1 (EC 2.7.11.1)(52 kDa ribosomal protein S6 kinase)(Ribosomal S6 kinase-like protein with two PSK domains 118 kDa protein)(SPHK1-binding protein) [Source:UniProtKB/Swiss-Prot;Acc:Q96S38]	GO:0006468 protein amino acid phosphorylation,GO:0007154 cell communication	GO:0005515 protein binding,GO:0005524 ATP binding,GO:0004674 protein serine/threonine kinase activity,GO:0004713 protein tyrosine kinase activity,GO:0035091 phosphoinositide binding,GO:0004672 protein kinase activity	GO:0005840 ribosome	124.605	579.373	101.247	501.594	101.247	261.717	2.58495	1.37014	*		OK	OK
H300003388	H300003388	ENSG00000157557	NM_005239	2114	ETS2	Protein C-ets-2 [Source:UniProtKB/Swiss-Prot;Acc:P15036]	GO:0006355 regulation of transcription, DNA-dependent,GO:0045893 positive regulation of transcription, DNA-dependent,GO:0001501 skeletal development	GO:0005515 protein binding,GO:0003700 transcription factor activity,GO:0043565 sequence-specific DNA binding	GO:0005634 nucleus	165.466	778.454	142.108	700.675	142.108	365.592	2.57264	1.36325	*		OK	OK
H200011064	H200011064	ENSG00000147162	NM_181673;NM_181673	8473	OGT	UDP-N-acetylglucosamine--peptide N-acetylglucosaminyltransferase 110 kDa subunit (EC 2.4.1.-)(O-linked N-acetylglucosamine transferase 110 kDa subunit)(O-GlcNAc transferase subunit p110) [Source:UniProtKB/Swiss-Prot;Acc:O15294]	GO:0007165 signal transduction,GO:0006396 RNA processing,GO:0006493 protein amino acid O-linked glycosylation,GO:0007584 response to nutrient	GO:0005515 protein binding,GO:0016757 transferase activity, transferring glycosyl groups,GO:0008375 acetylglucosaminyltransferase activity	GO:0005634 nucleus,GO:0005622 intracellular,GO:0005737 cytoplasm,GO:0005829 cytosol	298.641	1433.63	275.282	1355.85	275.282	707.442	2.56988	1.3617	*		OK	OK
H300005742	H300005742	ENSG00000115902	NM_003038	6509	SLC1A4	Neutral amino acid transporter A (Alanine/serine/cysteine/threonine transporter)(ASCT1)(SATT)(Solute carrier family 1 member 4) [Source:UniProtKB/Swiss-Prot;Acc:P43007]	GO:0006810 transport,GO:0015808 L-alanine transport,GO:0015824 proline transport,GO:0006835 dicarboxylic acid transport,GO:0035249 synaptic transmission, glutamatergic,GO:0015825 L-serine transport,GO:0015811 L-cystine transport,GO:0050890 cognition,GO:0015826 threonine transport,GO:0034589 hydroxyproline transport	GO:0015293 symporter activity,GO:0005254 chloride channel activity,GO:0015180 L-alanine transmembrane transporter activity,GO:0015193 L-proline transmembrane transporter activity,GO:0015194 L-serine transmembrane transporter activity,GO:0015184 L-cystine transmembrane transporter activity,GO:0017153 sodium:dicarboxylate symporter activity,GO:0015195 L-threonine transmembrane transporter activity,…	GO:0016020 membrane,GO:0005887 integral to plasma membrane,GO:0042470 melanosome,GO:0005882 intermediate filament	156.166	731.102	132.807	653.323	132.807	340.886	2.56677	1.35995	*		OK	OK
H300018135	H300018135	ENSG00000162032	NM_080861	90864	SPSB3	SPRY domain-containing SOCS box protein 3 (SSB-3) [Source:UniProtKB/Swiss-Prot;Acc:Q6PJ21]	GO:0007242 intracellular signaling cascade	-	-	220.306	1046.51	196.947	968.729	196.947	505.455	2.56645	1.35977	*		OK	OK
opHsV0400002594	opHsV0400002594	ENSG00000182197	NM_000127	2131	EXT1	Exostosin-1 (EC 2.4.1.224)(EC 2.4.1.225)(Glucuronosyl-N-acetylglucosaminyl-proteoglycan/N-acetylglucosaminyl-proteoglycan 4-alpha-N-acetylglucosaminyltransferase)(Putative tumor suppressor protein EXT1)(Multiple exostoses protein 1) [Source:UniProtKB/Swiss-Prot;Acc:Q16394]	GO:0007165 signal transduction,GO:0001503 ossification,GO:0045786 negative regulation of cell cycle,GO:0001501 skeletal development,GO:0006024 glycosaminoglycan biosynthetic process,GO:0015014 heparan sulfate proteoglycan biosynthetic process, polysaccharide chain biosynthetic process	GO:0005515 protein binding,GO:0016757 transferase activity, transferring glycosyl groups,GO:0042803 protein homodimerization activity,GO:0046982 protein heterodimerization activity,GO:0050508 glucuronosyl-N-acetylglucosaminyl-proteoglycan 4-alpha-N-acetylglucosaminyltransferase activity,GO:0042328 heparan sulfate N-acetylglucosaminyltransferase activity,GO:0050509 N-acetylglucosaminyl-proteoglyca…	GO:0016021 integral to membrane,GO:0016020 membrane,GO:0005794 Golgi apparatus,GO:0000139 Golgi membrane,GO:0005783 endoplasmic reticulum,GO:0005789 endoplasmic reticulum membrane,GO:0030176 integral to endoplasmic reticulum membrane	249.522	1188.87	226.163	1111.09	226.163	579.737	2.56336	1.35803	*		OK	OK
H200013577	H200013577	ENSG00000111897	NM_020755	57515	SERINC1	Serine incorporator 1 (Tumor differentially expressed protein 2)(Tumor differentially expressed 1 protein-like) [Source:UniProtKB/Swiss-Prot;Acc:Q9NRX5]	GO:0006629 lipid metabolic process,GO:0008654 phospholipid biosynthetic process,GO:0006665 sphingolipid metabolic process,GO:0006658 phosphatidylserine metabolic process,GO:0051347 positive regulation of transferase activity,GO:0015825 L-serine transport	GO:0005515 protein binding,GO:0015194 L-serine transmembrane transporter activity	GO:0005886 plasma membrane,GO:0016021 integral to membrane,GO:0016020 membrane,GO:0005783 endoplasmic reticulum,GO:0005789 endoplasmic reticulum membrane	808.261	3930.23	784.902	3852.45	784.902	2010.1	2.56096	1.35668	*		OK	OK
CHsGV10003094	CHsGV10003094	-	NM_001012631.1;NM_004221.4;NM_001012632.1;NM_001012633.1;NM_001012634.1;NM_001012636.1;NM_001012635.1;NM_001012718.1	9235	IL32	Interleukin-32 Precursor (IL-32)(Natural killer cells protein 4)(Tumor necrosis factor alpha-inducing factor) [Source:UniProtKB/Swiss-Prot;Acc:P24001]	-	-	-	356.673	1708.53	333.314	1630.75	333.314	850.88	2.55279	1.35207	*		OK	OK
AHsV10001201	AHsV10001201	-	NM_207304.1	10150	MBNL2	Muscleblind-like protein 2 (Muscleblind-like protein-like)(Muscleblind-like protein-like 39)(Muscleblind-like protein 1) [Source:UniProtKB/Swiss-Prot;Acc:Q5VZF2]	-	GO:0003676 nucleic acid binding,GO:0008270 zinc ion binding	-	130.951	604.097	107.593	526.318	107.593	274.618	2.55239	1.35185	*		OK	OK
H200002928	H200002928	ENSG00000171425	NM_016535	51545	ZNF581	Zinc finger protein 581 [Source:UniProtKB/Swiss-Prot;Acc:Q9P0T4]	GO:0006350 transcription,GO:0006355 regulation of transcription, DNA-dependent	GO:0003677 DNA binding,GO:0008270 zinc ion binding,GO:0046872 metal ion binding,GO:0003676 nucleic acid binding	GO:0005634 nucleus,GO:0005622 intracellular	250.287	1186.48	226.928	1108.7	226.928	578.49	2.54922	1.35006	*		OK	OK
H200002626	H200002626	ENSG00000162496	NM_004753	9249	DHRS3	Short-chain dehydrogenase/reductase 3 (EC 1.1.-.-)(Retinal short-chain dehydrogenase/reductase 1)(retSDR1)(DD83.1) [Source:UniProtKB/Swiss-Prot;Acc:O75911]	GO:0008152 metabolic process,GO:0007601 visual perception,GO:0055114 oxidation reduction,GO:0042572 retinol metabolic process	GO:0005488 binding,GO:0000166 nucleotide binding,GO:0003824 catalytic activity,GO:0016491 oxidoreductase activity,GO:0009055 electron carrier activity,GO:0004022 alcohol dehydrogenase activity	GO:0016021 integral to membrane,GO:0016020 membrane	305.047	1453.59	281.689	1375.81	281.689	717.858	2.54841	1.3496	*		OK	OK
opHsV0400006557	opHsV0400006557	ENSG00000136560	NM_004180;NM_004180;NM_004180;NM_004180	-	TANK	TRAF family member-associated NF-kappa-B activator (TRAF-interacting protein)(I-TRAF) [Source:UniProtKB/Swiss-Prot;Acc:Q92844]	-	-	-	284.381	1351.73	261.023	1273.95	261.023	664.711	2.54656	1.34855	*		OK	OK
H200000045	H200000045	ENSG00000067182	NM_001065	7132	TNFRSF1A	Tumor necrosis factor receptor superfamily member 1A Precursor (p60)(TNF-R1)(TNF-RI)(TNFR-I)(p55)(CD120a antigen) [Contains Tumor necrosis factor receptor superfamily member 1A, membrane form;Tumor necrosis factor-binding protein 1(TBPI)] [Source:UniProtKB/Swiss-Prot;Acc:P19438]	GO:0006693 prostaglandin metabolic process,GO:0007165 signal transduction,GO:0044419 interspecies interaction between organisms,GO:0006915 apoptosis,GO:0045944 positive regulation of transcription from RNA polymerase II promoter,GO:0043123 positive regulation of I-kappaB kinase/NF-kappaB cascade,GO:0019221 cytokine and chemokine mediated signaling pathway,GO:0050729 positive regulation of inflamm…	GO:0005515 protein binding,GO:0004872 receptor activity,GO:0005031 tumor necrosis factor receptor activity	GO:0005886 plasma membrane,GO:0005576 extracellular region,GO:0005887 integral to plasma membrane,GO:0045121 membrane raft	623.823	3002.45	600.464	2924.67	600.464	1526.01	2.54138	1.34561	*		OK	OK
opHsV0400000158	opHsV0400000158	ENSG00000123595	NM_004251	9367	RAB9A	Ras-related protein Rab-9A (Rab-9A) [Source:UniProtKB/Swiss-Prot;Acc:P51151]	GO:0007165 signal transduction,GO:0015031 protein transport,GO:0007264 small GTPase mediated signal transduction,GO:0006886 intracellular protein transport,GO:0006913 nucleocytoplasmic transport	GO:0005515 protein binding,GO:0000166 nucleotide binding,GO:0005525 GTP binding,GO:0003924 GTPase activity	GO:0005886 plasma membrane,GO:0005622 intracellular,GO:0005794 Golgi apparatus,GO:0000139 Golgi membrane,GO:0005783 endoplasmic reticulum,GO:0005789 endoplasmic reticulum membrane,GO:0005764 lysosome,GO:0005770 late endosome	210.184	986.569	186.826	908.79	186.826	474.181	2.53809	1.34374	*		OK	OK
AHsV10000948	AHsV10000948	-	NM_005406.2	6093	ROCK1	Rho-associated protein kinase 1 (EC 2.7.11.1)(Rho-associated, coiled-coil-containing protein kinase 1)(p160 ROCK-1)(p160ROCK)(Renal carcinoma antigen NY-REN-35) [Source:UniProtKB/Swiss-Prot;Acc:Q13464]	GO:0000910 cytokinesis,GO:0006468 protein amino acid phosphorylation,GO:0006915 apoptosis,GO:0007165 signal transduction,GO:0007242 intracellular signaling cascade,GO:0007266 Rho protein signal transduction,GO:0022614 membrane to membrane docking,GO:00300	GO:0000166 nucleotide binding,GO:0004672 protein kinase activity,GO:0004674 protein serine/threonine kinase activity,GO:0004713 protein tyrosine kinase activity,GO:0005515 protein binding,GO:0005524 ATP binding,GO:0008270 zinc ion binding,GO:0016740 trans	GO:0000139 Golgi membrane,GO:0005622 intracellular,GO:0005737 cytoplasm,GO:0005794 Golgi apparatus,GO:0005829 cytosol,GO:0016020 membrane	175.687	817.41	152.328	739.631	152.328	385.919	2.53346	1.34111	*		OK	OK
AHsV10002592	AHsV10002592	-	NM_001134773.1	8675	STX16	Syntaxin-16 (Syn16) [Source:UniProtKB/Swiss-Prot;Acc:O14662]	GO:0006886 intracellular protein transport,GO:0006898 receptor-mediated endocytosis,GO:0016192 vesicle-mediated transport	GO:0005044 scavenger receptor activity,GO:0005484 SNAP receptor activity,GO:0005515 protein binding	GO:0016020 membrane	357.318	1695.17	333.959	1617.4	333.959	843.911	2.52699	1.33742	*		OK	OK
H300003269	H300003269	ENSG00000174132	NM_198507	345757	FAM174A	Membrane protein FAM174A Precursor (Transmembrane protein 157)(Hepatitis C virus NS5A-transactivated protein 6)(HCV NS5A-transactivated protein 6) [Source:UniProtKB/Swiss-Prot;Acc:Q8TBP5]	-	-	GO:0016021 integral to membrane,GO:0016020 membrane	128.547	587.005	105.188	509.226	105.188	265.7	2.52595	1.33682	*		OK	OK
H300006847	H300006847	ENSG00000138433	NM_004882	9541	AC106900.1	CBF1-interacting corepressor (Recepin) [Source:UniProtKB/Swiss-Prot;Acc:Q86X95]	GO:0006350 transcription,GO:0006397 mRNA processing,GO:0045892 negative regulation of transcription, DNA-dependent,GO:0008380 RNA splicing	GO:0005515 protein binding,GO:0003700 transcription factor activity,GO:0003714 transcription corepressor activity,GO:0004981 muscarinic acetylcholine receptor activity	GO:0016020 membrane,GO:0005634 nucleus,GO:0016607 nuclear speck,GO:0000118 histone deacetylase complex	144.07	661.982	120.711	584.203	120.711	304.82	2.5252	1.3364	*		OK	OK
opHsV0400013062	opHsV0400013062	ENSG00000141568	NM_004514	3607	FOXK2	Forkhead box protein K2 (Interleukin enhancer-binding factor 1)(Cellular transcription factor ILF-1)(FOXK1) [Source:UniProtKB/Swiss-Prot;Acc:Q01167]	GO:0006350 transcription,GO:0006355 regulation of transcription, DNA-dependent,GO:0006357 regulation of transcription from RNA polymerase II promoter	GO:0000287 magnesium ion binding,GO:0003700 transcription factor activity,GO:0043565 sequence-specific DNA binding,GO:0003702 RNA polymerase II transcription factor activity	GO:0005634 nucleus	139.431	638.509	116.073	560.73	116.073	292.573	2.5206	1.33377	*		OK	OK
H200007282	H200007282	ENSG00000075643	NM_017947	55034	MOCOS	Molybdenum cofactor sulfurase (MoCo sulfurase)(EC 4.4.-.-)(HMCS)(MOS) [Source:UniProtKB/Swiss-Prot;Acc:Q96EN8]	GO:0008152 metabolic process,GO:0006777 Mo-molybdopterin cofactor biosynthetic process,GO:0043545 molybdopterin cofactor metabolic process	GO:0016829 lyase activity,GO:0030170 pyridoxal phosphate binding,GO:0003824 catalytic activity,GO:0030151 molybdenum ion binding,GO:0008265 Mo-molybdopterin cofactor sulfurase activity	GO:0005575 cellular_component	424.658	2016.26	401.3	1938.48	401.3	1011.45	2.52042	1.33367	*		OK	OK
H200011525	H200011525	ENSG00000158470	NM_004776	9334	B4GALT5	Beta-1,4-galactosyltransferase 5 (Beta-1,4-GalTase 5)(Beta4Gal-T5)(b4Gal-T5)(EC 2.4.1.-)(UDP-galactose:beta-N-acetylglucosamine beta-1,4-galactosyltransferase 5)(UDP-Gal:beta-GlcNAc beta-1,4-galactosyltransferase 5)(Beta-1,4-GalT II) [Source:UniProtKB/Swiss-Prot;Acc:O43286]	GO:0005975 carbohydrate metabolic process	GO:0046872 metal ion binding,GO:0016757 transferase activity, transferring glycosyl groups,GO:0030145 manganese ion binding,GO:0008378 galactosyltransferase activity	GO:0016021 integral to membrane,GO:0016020 membrane,GO:0005794 Golgi apparatus	445.726	2115.34	422.368	2037.56	422.368	1063.14	2.5171	1.33176	*		OK	OK
H200002748	H200002748	ENSG00000123130	NM_001037171;NM_001037171	-	ACOT9	Acyl-coenzyme A thioesterase 9 (Acyl-CoA thioesterase 9)(EC 3.1.2.-)(Acyl-CoA thioester hydrolase 9) [Source:UniProtKB/Swiss-Prot;Acc:Q9Y305]	-	-	-	235.032	1095.76	211.674	1017.98	211.674	531.152	2.5093	1.32728	*		OK	OK
H300021931	H300021931	ENSG00000135541	-	54806	AHI1	Jouberin (Abelson helper integration site 1 protein homolog)(AHI-1) [Source:UniProtKB/Swiss-Prot;Acc:Q8N157]	-	-	-	286.406	1341.79	263.048	1264.01	263.048	659.523	2.50724	1.3261	*		OK	OK
H300012168	H300012168	ENSG00000219481	NM_173638	-	NBPF15	Neuroblastoma breakpoint family, member 15 [Source:UniProtKB/Swiss-Prot;Acc:Q8N660]	-	-	-	310.809	1455.01	287.451	1377.23	287.451	718.601	2.49991	1.32188	*		OK	OK
H200000737	H200000737	ENSG00000100221	NM_014876	9929	JOSD1	Josephin-1 (Josephin domain-containing 1) [Source:UniProtKB/Swiss-Prot;Acc:Q15040]	-	-	GO:0005634 nucleus	366.074	1716.03	342.716	1638.26	342.716	854.795	2.49418	1.31857	*		OK	OK
H300019345	H300019345	ENSG00000133789	NM_015055	23075	AC026250.16	Switch-associated protein 70 (SWAP-70) [Source:UniProtKB/Swiss-Prot;Acc:Q9UH65]	GO:0006355 regulation of transcription, DNA-dependent,GO:0007242 intracellular signaling cascade,GO:0045190 isotype switching,GO:0016444 somatic cell DNA recombination	GO:0003677 DNA binding,GO:0005509 calcium ion binding,GO:0005515 protein binding,GO:0005524 ATP binding,GO:0003700 transcription factor activity,GO:0043565 sequence-specific DNA binding,GO:0046983 protein dimerization activity	GO:0005886 plasma membrane,GO:0005634 nucleus,GO:0005737 cytoplasm,GO:0042995 cell projection	180.302	827.267	156.943	749.488	156.943	391.062	2.49174	1.31715	*		OK	OK
H200006277	H200006277	ENSG00000034510	NM_021103	9168	TMSB10	Thymosin beta-10 [Source:UniProtKB/Swiss-Prot;Acc:P63313]	GO:0030036 actin cytoskeleton organization,GO:0007010 cytoskeleton organization,GO:0042989 sequestering of actin monomers	GO:0003779 actin binding	GO:0005856 cytoskeleton,GO:0005737 cytoplasm	3306.79	15739.4	3283.43	15661.7	3283.43	8171.81	2.4888	1.31545	*		OK	OK
AHsV10000926	AHsV10000926	-	NM_178043.1	55132	LARP2	La-related protein 2 (La ribonucleoprotein domain family member 2) [Source:UniProtKB/Swiss-Prot;Acc:Q659C4]	-	GO:0020037 heme binding	-	135.293	610.838	111.935	533.059	111.935	278.135	2.4848	1.31313	*		OK	OK
H200008051	H200008051	ENSG00000088448	NM_017664	55608	ANKRD10	Ankyrin repeat domain-containing protein 10 [Source:UniProtKB/Swiss-Prot;Acc:Q9NXR5]	-	-	-	337.757	1572.96	314.398	1495.18	314.398	780.143	2.48138	1.31115	*		OK	OK
AHsV10003159	AHsV10003159	-	NM_030939.4	81688	C6orf62	Uncharacterized protein C6orf62 (HBV X-transactivated gene 12 protein) [Source:UniProtKB/Swiss-Prot;Acc:Q9GZU0]	GO:0008150 biological_process	GO:0003674 molecular_function	GO:0005575 cellular_component,GO:0005622 intracellular	383.958	1792.19	360.599	1714.41	360.599	894.532	2.48068	1.31074	*		OK	OK
AHsV10000051	AHsV10000051	-	NM_000358.2	7045	TGFBI	Transforming growth factor-beta-induced protein ig-h3 Precursor (Beta ig-h3)(Kerato-epithelin)(RGD-containing collagen-associated protein)(RGD-CAP) [Source:UniProtKB/Swiss-Prot;Acc:Q15582]	GO:0007162 negative regulation of cell adhesion,GO:0007601 visual perception,GO:0008283 cell proliferation,GO:0050896 response to stimulus	GO:0005178 integrin binding,GO:0005515 protein binding	GO:0005576 extracellular region,GO:0005578 proteinaceous extracellular matrix,GO:0005615 extracellular space	901.639	4243.8	878.281	4166.02	878.281	2173.71	2.47496	1.30741	*		OK	OK
H200000150	H200000150	ENSG00000120053	NM_002079	2805	GOT1	Aspartate aminotransferase, cytoplasmic (EC 2.6.1.1)(Transaminase A)(Glutamate oxaloacetate transaminase 1) [Source:UniProtKB/Swiss-Prot;Acc:P17174]	GO:0009058 biosynthetic process,GO:0006520 amino acid metabolic process,GO:0051384 response to glucocorticoid stimulus,GO:0032869 cellular response to insulin stimulus,GO:0006533 aspartate catabolic process,GO:0006107 oxaloacetate metabolic process,GO:0006532 aspartate biosynthetic process,GO:0019550 glutamate catabolic process to aspartate,GO:0019551 glutamate catabolic process to 2-oxoglutarate…	GO:0030170 pyridoxal phosphate binding,GO:0003824 catalytic activity,GO:0008483 transaminase activity,GO:0016769 transferase activity, transferring nitrogenous groups,GO:0004069 aspartate transaminase activity,GO:0004609 phosphatidylserine decarboxylase activity	GO:0005737 cytoplasm,GO:0005829 cytosol	618.056	2890.74	594.697	2812.96	594.697	1467.72	2.46801	1.30335	*		OK	OK
H200008158	H200008158	ENSG00000112308	NM_030939	-	C6orf62	Uncharacterized protein C6orf62 (HBV X-transactivated gene 12 protein) [Source:UniProtKB/Swiss-Prot;Acc:Q9GZU0]	-	-	-	631.736	2955.08	608.377	2877.3	608.377	1501.29	2.4677	1.30317	*		OK	OK
AHsV10000090	AHsV10000090	-	NM_003136.2	6729	SRP54	Signal recognition particle 54 kDa protein (SRP54) [Source:UniProtKB/Swiss-Prot;Acc:P61011]	GO:0006614 SRP-dependent cotranslational protein targeting to membrane	GO:0000166 nucleotide binding,GO:0005515 protein binding,GO:0005524 ATP binding,GO:0005525 GTP binding,GO:0008312 7S RNA binding,GO:0017111 nucleoside-triphosphatase activity,GO:0043021 ribonucleoprotein binding	GO:0005634 nucleus,GO:0005737 cytoplasm,GO:0005786 signal recognition particle, endoplasmic reticulum targeting,GO:0016607 nuclear speck,GO:0048500 signal recognition particle	748.004	3495.83	724.646	3418.05	724.646	1783.44	2.46113	1.29932	*		OK	OK
H300019130	H300019130	ENSG00000126773	-	64430	C14orf135	Pecanex-like protein C14orf135 (Hepatitis C virus F protein-binding protein 2)(HCV F protein-binding protein 2) [Source:UniProtKB/Swiss-Prot;Acc:Q63HM2]	-	-	GO:0016021 integral to membrane	186.527	844.46	163.169	766.681	163.169	400.032	2.45164	1.29375	*		OK	OK
H300022067	H300022067	ENSG00000196428	NM_014779;NM_014779	-	TSC22D2	TSC22 domain family protein 2 (TSC22-related-inducible leucine zipper protein 4) [Source:UniProtKB/Swiss-Prot;Acc:O75157]	GO:0006355 regulation of transcription, DNA-dependent	GO:0003677 DNA binding,GO:0003700 transcription factor activity,GO:0004879 ligand-dependent nuclear receptor activity	GO:0005634 nucleus	142.033	635.221	118.675	557.442	118.675	290.857	2.45088	1.2933	*		OK	OK
H200005973	H200005973	ENSG00000104067	NM_003257;NM_003257	7082	TJP1	Tight junction protein ZO-1 (Zonula occludens protein 1)(Zona occludens protein 1)(Tight junction protein 1) [Source:UniProtKB/Swiss-Prot;Acc:Q07157]	-	GO:0005515 protein binding	GO:0005923 tight junction	195.726	887.026	172.368	809.247	172.368	422.242	2.44966	1.29258	*		OK	OK
opHsV0400005499	opHsV0400005499	ENSG00000151726	NM_001995	2180	ACSL1	Long-chain-fatty-acid--CoA ligase 1 (EC 6.2.1.3)(Long-chain acyl-CoA synthetase 1)(LACS 1)(Long-chain acyl-CoA synthetase 2)(LACS 2)(Palmitoyl-CoA ligase 1)(Palmitoyl-CoA ligase 2)(Acyl-CoA synthetase 1)(ACS1)(Long-chain fatty acid-CoA ligase 2) [Source:UniProtKB/Swiss-Prot;Acc:P33121]	GO:0008152 metabolic process,GO:0006629 lipid metabolic process,GO:0006631 fatty acid metabolic process,GO:0007586 digestion,GO:0046320 regulation of fatty acid oxidation	GO:0000287 magnesium ion binding,GO:0016874 ligase activity,GO:0003824 catalytic activity,GO:0004467 long-chain-fatty-acid-CoA ligase activity	GO:0016021 integral to membrane,GO:0016020 membrane,GO:0005792 microsome,GO:0005829 cytosol,GO:0005783 endoplasmic reticulum,GO:0005789 endoplasmic reticulum membrane,GO:0005739 mitochondrion,GO:0005777 peroxisome,GO:0005741 mitochondrial outer membrane,GO:0005778 peroxisomal membrane,GO:0005778 peroxisomal membrane	196.014	887.615	172.656	809.836	172.656	422.549	2.44735	1.29122	*		OK	OK
H300001943	H300001943	ENSG00000111875	-	25842	ASF1A	Histone chaperone ASF1A (Anti-silencing function protein 1 homolog A)(hAsf1)(hAsf1a)(CCG1-interacting factor A)(CIA)(hCIA) [Source:UniProtKB/Swiss-Prot;Acc:Q9Y294]	GO:0006350 transcription,GO:0006355 regulation of transcription, DNA-dependent,GO:0016568 chromatin modification,GO:0006281 DNA repair,GO:0006334 nucleosome assembly,GO:0006333 chromatin assembly or disassembly,GO:0006345 loss of chromatin silencing	GO:0003682 chromatin binding,GO:0042393 histone binding	GO:0005634 nucleus,GO:0016585 chromatin remodeling complex	356.221	1637.93	332.862	1560.15	332.862	814.042	2.44558	1.29018	*		OK	OK
H200012520	H200012520	ENSG00000196233	NM_032440;NM_032440;NM_032440	84458	LCOR	Ligand-dependent corepressor (LCoR)(Mblk1-related protein 2) [Source:UniProtKB/Swiss-Prot;Acc:Q96JN0]	GO:0006350 transcription,GO:0006355 regulation of transcription, DNA-dependent,GO:0000122 negative regulation of transcription from RNA polymerase II promoter	GO:0003677 DNA binding,GO:0003700 transcription factor activity,GO:0008134 transcription factor binding,GO:0003702 RNA polymerase II transcription factor activity	GO:0005634 nucleus	242.532	1104.63	219.174	1026.85	219.174	535.782	2.44455	1.28957	*		OK	OK
H300007014	H300007014	ENSG00000176624	NM_016626;NM_016626	51320	MEX3C	RNA-binding protein MEX3C (RING finger and KH domain-containing protein 2)(RING finger protein 194) [Source:UniProtKB/Swiss-Prot;Acc:Q5U5Q3]	GO:0006355 regulation of transcription, DNA-dependent,GO:0042309 homoiothermy,GO:0050826 response to freezing	GO:0003677 DNA binding,GO:0005515 protein binding,GO:0008270 zinc ion binding,GO:0046872 metal ion binding,GO:0003723 RNA binding,GO:0004879 ligand-dependent nuclear receptor activity,GO:0045735 nutrient reservoir activity,GO:0050825 ice binding	GO:0005634 nucleus,GO:0005737 cytoplasm	191.15	863.662	167.791	785.883	167.791	410.051	2.44382	1.28914	*		OK	OK
CHsGV10000308	CHsGV10000308	-	NM_014350.2;NM_001077654.1	25816	TNFAIP8	Tumor necrosis factor, alpha-induced protein 8 (Head and neck tumor and metastasis-related protein)(TNF-induced protein GG2-1)(SCC-S2)(NF-kappa-B-inducible DED-containing protein)(NDED)(MDC-3.13) [Source:UniProtKB/Swiss-Prot;Acc:O95379]	-	-	-	158.412	709.685	135.054	631.906	135.054	329.71	2.44133	1.28767	*		OK	OK
AHsV10003342	AHsV10003342	-	NM_012250.4	22800	RRAS2	Ras-related protein R-Ras2 Precursor (Ras-like protein TC21)(Teratocarcinoma oncogene) [Source:UniProtKB/Swiss-Prot;Acc:P62070]	GO:0006886 intracellular protein transport,GO:0006913 nucleocytoplasmic transport,GO:0007165 signal transduction,GO:0007264 small GTPase mediated signal transduction,GO:0007265 Ras protein signal transduction,GO:0009987 cellular process,GO:0015031 protein	GO:0000166 nucleotide binding,GO:0003924 GTPase activity,GO:0005515 protein binding,GO:0005525 GTP binding	GO:0005622 intracellular,GO:0005783 endoplasmic reticulum,GO:0005886 plasma membrane	239.944	1090.25	216.586	1012.47	216.586	528.281	2.43913	1.28637	*		OK	OK
H200006343	H200006343	ENSG00000141458	NM_000271	4864	NPC1	Niemann-Pick C1 protein Precursor [Source:UniProtKB/Swiss-Prot;Acc:O15118]	GO:0006897 endocytosis,GO:0007041 lysosomal transport,GO:0008206 bile acid metabolic process,GO:0016242 negative regulation of macroautophagy,GO:0033344 cholesterol efflux,GO:0042632 cholesterol homeostasis,GO:0046686 response to cadmium ion,GO:0030301 cholesterol transport,GO:0046686 response to cadmium ion	GO:0005515 protein binding,GO:0008158 hedgehog receptor activity,GO:0015248 sterol transporter activity	GO:0016021 integral to membrane,GO:0016020 membrane,GO:0005768 endosome,GO:0005887 integral to plasma membrane,GO:0005783 endoplasmic reticulum,GO:0048471 perinuclear region of cytoplasm,GO:0005765 lysosomal membrane,GO:0031902 late endosome membrane,GO:0005635 nuclear envelope	583.158	2694.65	559.8	2616.87	559.8	1365.41	2.4391	1.28635	*		OK	OK
H200003768	H200003768	ENSG00000186020	-	57711	ZNF529	Zinc finger protein 529 [Source:UniProtKB/Swiss-Prot;Acc:Q6P280]	GO:0006350 transcription,GO:0006355 regulation of transcription, DNA-dependent	GO:0003677 DNA binding,GO:0008270 zinc ion binding,GO:0046872 metal ion binding,GO:0003676 nucleic acid binding	GO:0005634 nucleus,GO:0005622 intracellular	127.602	564.142	104.244	486.362	104.244	253.77	2.4344	1.28356	*		OK	OK
H300020635	H300020635	ENSG00000124222	NM_001001433;NM_001001433;NM_001001433;NM_001001433;NM_001001433;NM_001001433;NM_001001433;NM_001001433	-	STX16	Syntaxin-16 (Syn16) [Source:UniProtKB/Swiss-Prot;Acc:O14662]	GO:0006886 intracellular protein transport,GO:0016192 vesicle-mediated transport	GO:0005515 protein binding,GO:0005484 SNAP receptor activity	GO:0016020 membrane	297.176	1354.97	273.818	1277.19	273.818	666.402	2.43374	1.28318	*		OK	OK
AHsV10002019	AHsV10002019	-	NM_020412.4	57132	-	-	-	-	-	377.347	1727.4	353.989	1649.62	353.989	860.727	2.43151	1.28185	*		OK	OK
H200001120	H200001120	ENSG00000076053	NM_016090;NM_016090	10179	RBM7	RNA-binding protein 7 (RNA-binding motif protein 7) [Source:UniProtKB/Swiss-Prot;Acc:Q9Y580]	GO:0007126 meiosis	GO:0000166 nucleotide binding,GO:0003676 nucleic acid binding,GO:0003723 RNA binding	-	191.911	862.64	168.553	784.861	168.553	409.518	2.42961	1.28072	*		OK	OK
H200001050	H200001050	ENSG00000176407	-	56888	KCMF1	E3 ubiquitin-protein ligase KCMF1 (EC 6.3.2.-)(Potassium channel modulatory factor)(PCMF)(FGF-induced in gastric cancer)(ZZ-type zinc finger-containing protein 1) [Source:UniProtKB/Swiss-Prot;Acc:Q9P0J7]	GO:0006511 ubiquitin-dependent protein catabolic process	GO:0008270 zinc ion binding,GO:0046872 metal ion binding,GO:0016874 ligase activity	GO:0005622 intracellular	553.034	2538.51	529.675	2460.73	529.675	1283.94	2.42401	1.2774	*		OK	OK
opHsV0400001102	opHsV0400001102	ENSG00000189269	NM_016449	51233	AP000346.1	Putative uncharacterized protein LOC51233 [Source:UniProtKB/Swiss-Prot;Acc:Q6PGQ1]	-	-	-	129.983	569.603	106.625	491.824	106.625	256.62	2.40675	1.26709	*		OK	OK
H200008241	H200008241	ENSG00000177425	NM_002583	5074	PAWR	PRKC apoptosis WT1 regulator protein (Prostate apoptosis response 4 protein)(Par-4) [Source:UniProtKB/Swiss-Prot;Acc:Q96IZ0]	GO:0008285 negative regulation of cell proliferation,GO:0006350 transcription,GO:0006355 regulation of transcription, DNA-dependent,GO:0000122 negative regulation of transcription from RNA polymerase II promoter,GO:0043065 positive regulation of apoptosis	GO:0019899 enzyme binding,GO:0003714 transcription corepressor activity	GO:0005634 nucleus,GO:0005737 cytoplasm	159.081	702.82	135.723	625.04	135.723	326.128	2.4029	1.26478	*		OK	OK
H300018130	H300018130	ENSG00000204387	NM_001040437;NM_001040437;NM_001040437	50854	C6orf48	Protein G8 [Source:UniProtKB/Swiss-Prot;Acc:Q9UBA6]	-	-	-	1519.56	6964.19	1496.2	6886.41	1496.2	3593.13	2.4015	1.26394	*		OK	OK
H300002858	H300002858	ENSG00000187678	NM_030964	81848	SPRY4	Protein sprouty homolog 4 (Spry-4) [Source:UniProtKB/Swiss-Prot;Acc:Q9C004]	GO:0009966 regulation of signal transduction,GO:0007275 multicellular organismal development,GO:0043407 negative regulation of MAP kinase activity	GO:0005515 protein binding	GO:0005886 plasma membrane,GO:0016020 membrane,GO:0005737 cytoplasm,GO:0042995 cell projection	235.099	1049.95	211.741	972.171	211.741	507.251	2.39562	1.2604	*		OK	OK
H200015047	H200015047	ENSG00000101782	NM_003831	8780	RIOK3	Serine/threonine-protein kinase RIO3 (RIO kinase 3)(EC 2.7.11.1)(sudD homolog) [Source:UniProtKB/Swiss-Prot;Acc:O14730]	GO:0006468 protein amino acid phosphorylation,GO:0007059 chromosome segregation	GO:0016740 transferase activity,GO:0005515 protein binding,GO:0000166 nucleotide binding,GO:0005524 ATP binding,GO:0016301 kinase activity,GO:0004674 protein serine/threonine kinase activity	GO:0005634 nucleus,GO:0005737 cytoplasm	163.735	722.062	140.376	644.282	140.376	336.168	2.39477	1.25989	*		OK	OK
opHsV0400000712	opHsV0400000712	ENSG00000167657	NM_001348	1613	DAPK3	Death-associated protein kinase 3 (DAP kinase 3)(EC 2.7.11.1)(DAP-like kinase)(Dlk)(ZIP-kinase) [Source:UniProtKB/Swiss-Prot;Acc:O43293]	GO:0006468 protein amino acid phosphorylation,GO:0016568 chromatin modification,GO:0007243 protein kinase cascade,GO:0006917 induction of apoptosis,GO:0006915 apoptosis	GO:0016740 transferase activity,GO:0005515 protein binding,GO:0000166 nucleotide binding,GO:0005524 ATP binding,GO:0004674 protein serine/threonine kinase activity,GO:0004713 protein tyrosine kinase activity,GO:0004672 protein kinase activity	GO:0005634 nucleus,GO:0005737 cytoplasm	250.257	1117.57	226.899	1039.8	226.899	542.536	2.39109	1.25767	*		OK	OK
H200001313	H200001313	ENSG00000109920	NM_015308	23360	FNBP4	Formin-binding protein 4 (Formin-binding protein 30) [Source:UniProtKB/Swiss-Prot;Acc:Q8N3X1]	GO:0007155 cell adhesion,GO:0007160 cell-matrix adhesion,GO:0007186 G-protein coupled receptor protein signaling pathway	GO:0005515 protein binding,GO:0005198 structural molecule activity,GO:0004969 histamine receptor activity	GO:0016021 integral to membrane,GO:0005856 cytoskeleton,GO:0015629 actin cytoskeleton	270.938	1210.47	247.58	1132.69	247.58	591.004	2.38713	1.25528	*		OK	OK
H200016604	H200016604	ENSG00000144747	NM_007114	-	TMF1	TATA element modulatory factor (TMF) [Source:UniProtKB/Swiss-Prot;Acc:P82094]	-	-	-	183.2	807.266	159.842	729.487	159.842	380.626	2.38126	1.25173	*		OK	OK
H200016571	H200016571	ENSG00000144635	NM_016141	51143	DYNC1LI1	Cytoplasmic dynein 1 light intermediate chain 1 (Dynein light intermediate chain 1, cytosolic)(Dynein light chain A)(DLC-A) [Source:UniProtKB/Swiss-Prot;Acc:Q9Y6G9]	GO:0007264 small GTPase mediated signal transduction	GO:0000166 nucleotide binding,GO:0005524 ATP binding,GO:0005525 GTP binding,GO:0003774 motor activity,GO:0017111 nucleoside-triphosphatase activity	GO:0005874 microtubule,GO:0030286 dynein complex	132.035	573.535	108.676	495.756	108.676	258.671	2.3802	1.25108	*		OK	OK
H200011400	H200011400	ENSG00000110046	NM_015104	-	ATG2A	Autophagy-related protein 2 homolog A [Source:UniProtKB/Swiss-Prot;Acc:Q2TAZ0]	-	GO:0008270 zinc ion binding,GO:0016491 oxidoreductase activity	-	144.073	626.638	120.715	548.859	120.715	286.379	2.37236	1.24632	*		OK	OK
CHsGV10000873	CHsGV10000873	-	NM_153358.2	163049	ZNF791	Zinc finger protein 791 [Source:UniProtKB/Swiss-Prot;Acc:Q3KP31]	-	GO:0003677 DNA binding,GO:0008270 zinc ion binding,GO:0003676 nucleic acid binding,GO:0046872 metal ion binding	GO:0005634 nucleus,GO:0005622 intracellular	142.084	616.325	118.725	538.546	118.725	280.998	2.36679	1.24293	*		OK	OK
H300022757	H300022757	ENSG00000150527	NM_005930	4253	CTAGE5	Cutaneous T-cell lymphoma-associated antigen 5 (Protein cTAGE-5)(cTAGE family member 5)(Meningioma-expressed antigen 6/11) [Source:UniProtKB/Swiss-Prot;Acc:O15320]	-	-	-	211.1	927.863	187.742	850.084	187.742	443.55	2.36255	1.24035	*		OK	OK
opHsV0400002182	opHsV0400002182	ENSG00000118197	NM_001031725	83479	DDX59	Probable ATP-dependent RNA helicase DDX59 (EC 3.6.1.-)(DEAD box protein 59)(Zinc finger HIT domain-containing protein 5) [Source:UniProtKB/Swiss-Prot;Acc:Q5T1V6]	-	GO:0016787 hydrolase activity,GO:0008270 zinc ion binding,GO:0000166 nucleotide binding,GO:0005524 ATP binding,GO:0046872 metal ion binding,GO:0003676 nucleic acid binding,GO:0003723 RNA binding,GO:0004386 helicase activity,GO:0008026 ATP-dependent helicase activity	GO:0005622 intracellular	149.551	647.952	126.192	570.173	126.192	297.5	2.35751	1.23727	*		OK	OK
AHsV10000745	AHsV10000745	-	NM_001135673	64225	ATL2	Atlastin-2 (ADP-ribosylation factor-like protein 6-interacting protein 2)(ARL-6-interacting protein 2)(Aip-2) [Source:UniProtKB/Swiss-Prot;Acc:Q8NHH9]	-	GO:0000166 nucleotide binding,GO:0003924 GTPase activity,GO:0005525 GTP binding	GO:0016020 membrane,GO:0016021 integral to membrane	283.329	1250.87	259.971	1173.09	259.971	612.088	2.35445	1.23539	*		OK	OK
AHsV10002176	AHsV10002176	-	NM_000191.2	3155	HMGCL	Hydroxymethylglutaryl-CoA lyase, mitochondrial Precursor (HMG-CoA lyase)(HL)(EC 4.1.3.4)(3-hydroxy-3-methylglutarate-CoA lyase) [Source:UniProtKB/Swiss-Prot;Acc:P35914]	GO:0008152 metabolic process	GO:0003824 catalytic activity,GO:0004419 hydroxymethylglutaryl-CoA lyase activity,GO:0016829 lyase activity,GO:0046872 metal ion binding	GO:0005739 mitochondrion,GO:0005743 mitochondrial inner membrane,GO:0005759 mitochondrial matrix	157.59	682.003	134.231	604.224	134.231	315.267	2.34868	1.23185	*		OK	OK
AHsV10001264	AHsV10001264	-	NM_005665.4	7813	EVI5	Ecotropic viral integration site 5 protein homolog (EVI-5)(Neuroblastoma stage 4S gene protein) [Source:UniProtKB/Swiss-Prot;Acc:O60447]	GO:0007049 cell cycle,GO:0007275 multicellular organismal development,GO:0008283 cell proliferation,GO:0032313 regulation of Rab GTPase activity,GO:0051301 cell division	GO:0005097 Rab GTPase activator activity,GO:0005515 protein binding	GO:0005622 intracellular,GO:0005634 nucleus,GO:0005813 centrosome	131.129	562.44	107.77	484.661	107.77	252.882	2.3465	1.23051	*		OK	OK
AHsV10002996	AHsV10002996	-	NM_014888.2	10447	FAM3C	Protein FAM3C Precursor [Source:UniProtKB/Swiss-Prot;Acc:Q92520]	GO:0008150 biological_process	GO:0005125 cytokine activity	GO:0005576 extracellular region	333.691	1471.6	310.332	1393.82	310.332	727.255	2.34347	1.22865	*		OK	OK
AHsV10000415	AHsV10000415	-	NM_017905.4	55002	TMCO3	Transmembrane and coiled-coil domain-containing protein 3 Precursor (Putative LAG1-interacting protein) [Source:UniProtKB/Swiss-Prot;Acc:Q6UWJ1]	GO:0006812 cation transport	GO:0015299 solute:hydrogen antiporter activity	GO:0016021 integral to membrane	224.474	978.726	201.115	900.947	201.115	470.089	2.33741	1.22491	*		OK	OK
H300000627	H300000627	ENSG00000078142	NM_002647;NM_002647	5289	PIK3C3	Phosphatidylinositol 3-kinase catalytic subunit type 3 (PtdIns-3-kinase type 3)(PI3-kinase type 3)(PI3K type 3)(EC 2.7.1.137)(Phosphoinositide-3-kinase class 3)(Phosphatidylinositol 3-kinase p100 subunit) [Source:UniProtKB/Swiss-Prot;Acc:Q8NEB9]	GO:0048015 phosphoinositide-mediated signaling,GO:0046854 phosphoinositide phosphorylation	GO:0016740 transferase activity,GO:0005515 protein binding,GO:0005488 binding,GO:0000166 nucleotide binding,GO:0005524 ATP binding,GO:0030145 manganese ion binding,GO:0016773 phosphotransferase activity, alcohol group as acceptor,GO:0004428 inositol or phosphatidylinositol kinase activity,GO:0016303 1-phosphatidylinositol-3-kinase activity	GO:0005829 cytosol,GO:0005942 phosphoinositide 3-kinase complex	160.292	690.86	136.934	613.081	136.934	319.888	2.33608	1.22409	*		OK	OK
CHsGV10002281	CHsGV10002281	-	NM_006996.2	10560	SLC19A2	Thiamine transporter 1 (ThTr-1)(ThTr1)(Thiamine carrier 1)(TC1)(Solute carrier family 19 member 2) [Source:UniProtKB/Swiss-Prot;Acc:O60779]	GO:0007186 G-protein coupled receptor protein signaling pathway,GO:0007166 cell surface receptor linked signal transduction,GO:0006810 transport,GO:0042723 thiamin and derivative metabolic process,GO:0015888 thiamin transport,GO:0015888 thiamin transport	GO:0005542 folic acid binding,GO:0008518 reduced folate carrier activity,GO:0004926 non-G-protein coupled 7TM receptor activity,GO:0008517 folic acid transporter activity,GO:0015234 thiamin transmembrane transporter activity,GO:0015234 thiamin transmembrane transporter activity	GO:0005737 cytoplasm,GO:0016021 integral to membrane,GO:0005886 plasma membrane,GO:0016020 membrane,GO:0005886 plasma membrane	250.419	1093.95	227.06	1016.17	227.06	530.209	2.3351	1.22348	*		OK	OK
H200006061	H200006061	ENSG00000168374	NM_001660	378	ARF4	ADP-ribosylation factor 4 [Source:UniProtKB/Swiss-Prot;Acc:P18085]	GO:0015031 protein transport,GO:0007264 small GTPase mediated signal transduction,GO:0006886 intracellular protein transport,GO:0016192 vesicle-mediated transport	GO:0000166 nucleotide binding,GO:0005525 GTP binding,GO:0003924 GTPase activity	GO:0005886 plasma membrane,GO:0005622 intracellular,GO:0005737 cytoplasm,GO:0005794 Golgi apparatus	2800.76	12500.8	2777.4	12423.1	2777.4	6482	2.33384	1.2227	*		OK	OK
H200000437	H200000437	ENSG00000198380	NM_002056	-	GFPT1	Glucosamine--fructose-6-phosphate aminotransferase [isomerizing] 1 (EC 2.6.1.16)(Glutamine:fructose 6 phosphate amidotransferase 1)(GFAT 1)(GFAT1)(D-fructose-6-phosphate amidotransferase 1)(Hexosephosphate aminotransferase 1) [Source:UniProtKB/Swiss-Prot;Acc:Q06210]	GO:0005975 carbohydrate metabolic process,GO:0008152 metabolic process,GO:0016051 carbohydrate biosynthetic process,GO:0006541 glutamine metabolic process,GO:0006112 energy reserve metabolic process,GO:0006002 fructose 6-phosphate metabolic process	GO:0016740 transferase activity,GO:0005529 sugar binding,GO:0004360 glutamine-fructose-6-phosphate transaminase (isomerizing) activity	GO:0005737 cytoplasm	507.207	2236.79	483.848	2159.01	483.848	1126.51	2.32823	1.21923	*		OK	OK
H200008190	H200008190	ENSG00000004534	NM_005777	10180	RBM6	RNA-binding protein 6 (RNA-binding motif protein 6)(RNA-binding protein DEF-3)(Lung cancer antigen NY-LU-12)(Protein G16) [Source:UniProtKB/Swiss-Prot;Acc:P78332]	GO:0006396 RNA processing	GO:0003677 DNA binding,GO:0008270 zinc ion binding,GO:0003676 nucleic acid binding,GO:0003723 RNA binding	GO:0005634 nucleus,GO:0005622 intracellular	433.611	1907.64	410.252	1829.86	410.252	954.768	2.32727	1.21864	*		OK	OK
opHsV0400001078	opHsV0400001078	ENSG00000176903	NM_006029	9240	PNMA1	Paraneoplastic antigen Ma1 (Neuron- and testis-specific protein 1)(37 kDa neuronal protein) [Source:UniProtKB/Swiss-Prot;Acc:Q8ND90]	GO:0007283 spermatogenesis,GO:0007417 central nervous system development	-	GO:0005634 nucleus,GO:0005737 cytoplasm,GO:0005730 nucleolus,GO:0005925 focal adhesion	269.676	1175.13	246.317	1097.35	246.317	572.565	2.3245	1.21692	*		OK	OK
H200013951	H200013951	ENSG00000136436	NM_005831	10241	CALCOCO2	Calcium-binding and coiled-coil domain-containing protein 2 (Nuclear domain 10 protein NDP52)(Nuclear domain 10 protein 52)(Nuclear dot protein 52)(Antigen nuclear dot 52 kDa protein) [Source:UniProtKB/Swiss-Prot;Acc:Q13137]	GO:0016032 viral reproduction,GO:0034341 response to interferon-gamma	GO:0005515 protein binding,GO:0042803 protein homodimerization activity	GO:0005634 nucleus,GO:0005856 cytoskeleton,GO:0005737 cytoplasm,GO:0005794 Golgi apparatus,GO:0005625 soluble fraction,GO:0048471 perinuclear region of cytoplasm	263.017	1145.43	239.659	1067.65	239.659	557.072	2.32444	1.21688	*		OK	OK
H200001688	H200001688	ENSG00000116266	NM_007269	6814	STXBP3	Syntaxin-binding protein 3 (Unc-18 homolog 3)(Unc-18-3)(Unc-18C)(Platelet Sec1 protein)(PSP) [Source:UniProtKB/Swiss-Prot;Acc:O00186]	GO:0015031 protein transport,GO:0008150 biological_process,GO:0006904 vesicle docking during exocytosis,GO:0016192 vesicle-mediated transport	GO:0003674 molecular_function	GO:0016020 membrane,GO:0005737 cytoplasm,GO:0005575 cellular_component,GO:0005829 cytosol	279.204	1213.17	255.845	1135.39	255.845	592.413	2.31551	1.21133	*		OK	OK
H200014832	H200014832	ENSG00000107581	NM_003750	8661	EIF3S10	Eukaryotic translation initiation factor 3 subunit A (eIF3a)(Eukaryotic translation initiation factor 3 subunit 10)(eIF-3-theta)(eIF3 p167)(eIF3 p180)(eIF3 p185) [Source:UniProtKB/Swiss-Prot;Acc:Q14152]	GO:0006412 translation,GO:0008150 biological_process,GO:0006446 regulation of translational initiation	GO:0005515 protein binding,GO:0005198 structural molecule activity,GO:0003743 translation initiation factor activity	GO:0005634 nucleus,GO:0005737 cytoplasm,GO:0005829 cytosol,GO:0005852 eukaryotic translation initiation factor 3 complex,GO:0005634 nucleus	2438.94	10792.3	2415.58	10714.5	2415.58	5590.53	2.31436	1.21061	*		OK	OK
H300022909	H300022909	ENSG00000181722	NM_015642;NM_015642	26137	ZBTB20	Zinc finger and BTB domain-containing protein 20 (Zinc finger protein 288)(Dendritic-derived BTB/POZ zinc finger protein) [Source:UniProtKB/Swiss-Prot;Acc:Q9HC78]	GO:0006350 transcription,GO:0006355 regulation of transcription, DNA-dependent	GO:0003677 DNA binding,GO:0005515 protein binding,GO:0008270 zinc ion binding,GO:0046872 metal ion binding,GO:0003676 nucleic acid binding	GO:0005634 nucleus,GO:0005622 intracellular	156.43	667.492	133.072	589.713	133.072	307.696	2.31225	1.2093	*		OK	OK
H300021181	H300021181	ENSG00000168615	NM_003816;NM_003816	8754	ADAM9	ADAM 9 Precursor (EC 3.4.24.-)(A disintegrin and metalloproteinase domain 9)(Metalloprotease/disintegrin/cysteine-rich protein 9)(Myeloma cell metalloproteinase)(Meltrin-gamma)(Cellular disintegrin-related protein) [Source:UniProtKB/Swiss-Prot;Acc:Q13443]	GO:0006508 proteolysis	GO:0008270 zinc ion binding,GO:0004222 metalloendopeptidase activity	-	281.799	1222.99	258.441	1145.21	258.441	597.539	2.31209	1.2092	*		OK	OK
H300018868	H300018868	ENSG00000197594	NM_006208;NM_006208	5167	ENPP1	Ectonucleotide pyrophosphatase/phosphodiesterase family member 1 (E-NPP 1)(Phosphodiesterase I/nucleotide pyrophosphatase 1)(Plasma-cell membrane glycoprotein PC-1) [Includes Alkaline phosphodiesterase I(EC 3.1.4.1);Nucleotide pyrophosphatase(NPPase)(EC 3.6.1.9)] [Source:UniProtKB/Swiss-Prot;Acc:P22413]	GO:0008152 metabolic process,GO:0030308 negative regulation of cell growth,GO:0006796 phosphate metabolic process,GO:0030643 cellular phosphate ion homeostasis,GO:0001503 ossification,GO:0046325 negative regulation of glucose import,GO:0006091 generation of precursor metabolites and energy,GO:0032869 cellular response to insulin stimulus,GO:0046627 negative regulation of insulin receptor signalin…	GO:0005515 protein binding,GO:0016787 hydrolase activity,GO:0005524 ATP binding,GO:0046872 metal ion binding,GO:0003676 nucleic acid binding,GO:0003824 catalytic activity,GO:0005158 insulin receptor binding,GO:0042803 protein homodimerization activity,GO:0004519 endonuclease activity,GO:0050656 3'-phosphoadenosine 5'-phosphosulfate binding,GO:0047429 nucleoside-triphosphate diphosphatase activity…	GO:0005886 plasma membrane,GO:0016021 integral to membrane,GO:0009986 cell surface,GO:0016323 basolateral plasma membrane,GO:0005615 extracellular space	341.669	1485.87	318.31	1408.09	318.31	734.702	2.30813	1.20673	*		OK	OK
H200002536	H200002536	ENSG00000153046	NM_004824;NM_170752;NM_170752	9425	CDYL	Chromodomain Y-like protein (CDY-like)(EC 2.3.1.48) [Source:UniProtKB/Swiss-Prot;Acc:Q9Y232]	GO:0008152 metabolic process	GO:0003824 catalytic activity	-	176.999	756.865	153.64	679.086	153.64	354.328	2.30622	1.20553	*		OK	OK
CHsGV10002205	CHsGV10002205	-	NM_001130046.1;NM_004591.2	6364	CCL20	C-C motif chemokine 20 Precursor (Small-inducible cytokine A20)(Macrophage inflammatory protein 3 alpha)(MIP-3-alpha)(Liver and activation-regulated chemokine)(CC chemokine LARC)(Beta chemokine exodus-1) [Contains CCL20(1-67);CCL20(1-64);CCL20(2-70)] [Source:UniProtKB/Swiss-Prot;Acc:P78556]	GO:0042742 defense response to bacterium,GO:0006954 inflammatory response,GO:0007267 cell-cell signaling,GO:0006955 immune response,GO:0007165 signal transduction,GO:0006935 chemotaxis,GO:0042466 chemokinesis	GO:0005125 cytokine activity,GO:0008009 chemokine activity	GO:0005615 extracellular space,GO:0005576 extracellular region	1693.49	7452.17	1670.13	7374.39	1670.13	3847.75	2.30386	1.20405	*		OK	OK
AHsV10003281	AHsV10003281	-	NM_001135732.1	10043	TOM1	Target of Myb protein 1 [Source:UniProtKB/Swiss-Prot;Acc:O60784]	GO:0006886 intracellular protein transport	-	GO:0005622 intracellular	453.941	1977.49	430.583	1899.71	430.583	991.213	2.30203	1.2029	*		OK	OK
H200011806	H200011806	ENSG00000149231	NM_024725	79780	CCDC82	Coiled-coil domain-containing protein 82 [Source:UniProtKB/Swiss-Prot;Acc:Q8N4S0]	-	GO:0005515 protein binding	-	205.965	883.236	182.606	805.457	182.606	420.265	2.30148	1.20256	*		OK	OK
AHsV10001807	AHsV10001807	-	NM_033540.2	55669	MFN1	Mitofusin-1 (EC 3.6.5.-)(Transmembrane GTPase MFN1)(Fzo homolog) [Source:UniProtKB/Swiss-Prot;Acc:Q8IWA4]	GO:0008053 mitochondrial fusion,GO:0008150 biological_process	GO:0000166 nucleotide binding,GO:0003924 GTPase activity,GO:0005525 GTP binding,GO:0016787 hydrolase activity	GO:0005737 cytoplasm,GO:0005739 mitochondrion,GO:0005741 mitochondrial outer membrane,GO:0016020 membrane,GO:0016021 integral to membrane	171.655	731.894	148.297	654.115	148.297	341.299	2.30146	1.20255	*		OK	OK
AHsV10001883	AHsV10001883	-	NM_001903.2	1495	CTNNA1	Catenin alpha-1 (Cadherin-associated protein)(Alpha E-catenin)(NY-REN-13 antigen) [Source:UniProtKB/Swiss-Prot;Acc:P35221]	GO:0007155 cell adhesion,GO:0043297 apical junction assembly	GO:0005198 structural molecule activity,GO:0005515 protein binding,GO:0017166 vinculin binding,GO:0045296 cadherin binding	GO:0005737 cytoplasm,GO:0005886 plasma membrane,GO:0015629 actin cytoskeleton,GO:0030054 cell junction	1336.09	5855.16	1312.73	5777.38	1312.73	3014.47	2.29634	1.19934	*		OK	OK
H300006569	H300006569	ENSG00000140939	NM_003946	8996	NOL3	nucleolar protein 3 [Source:RefSeq peptide;Acc:NP_003937]	GO:0042981 regulation of apoptosis,GO:0001666 response to hypoxia	GO:0005515 protein binding	GO:0005622 intracellular	256.837	1104.99	233.478	1027.21	233.478	535.969	2.29558	1.19886	*		OK	OK
AHsV10002027	AHsV10002027	-	NM_006292.2	7251	TSG101	Tumor susceptibility gene 101 protein (ESCRT-I complex subunit TSG101) [Source:UniProtKB/Swiss-Prot;Acc:Q99816]	GO:0001558 regulation of cell growth,GO:0006464 protein modification process,GO:0007049 cell cycle,GO:0007050 cell cycle arrest,GO:0008285 negative regulation of cell proliferation,GO:0015031 protein transport,GO:0030216 keratinocyte differentiation,GO:00	GO:0003677 DNA binding,GO:0003714 transcription corepressor activity,GO:0005515 protein binding,GO:0019787 small conjugating protein ligase activity,GO:0043130 ubiquitin binding	GO:0005634 nucleus,GO:0005730 nucleolus,GO:0005737 cytoplasm,GO:0005771 multivesicular body,GO:0005886 plasma membrane,GO:0031902 late endosome membrane	363.646	1574.27	340.288	1496.49	340.288	780.824	2.2946	1.19824	*		OK	OK
CHsGV10000602	CHsGV10000602	-	NM_012180.2	26269	FBXO8	F-box only protein 8 (F-box/SEC7 protein FBS) [Source:UniProtKB/Swiss-Prot;Acc:Q9NRD0]	GO:0006511 ubiquitin-dependent protein catabolic process,GO:0032012 regulation of ARF protein signal transduction,GO:0006511 ubiquitin-dependent protein catabolic process	GO:0005086 ARF guanyl-nucleotide exchange factor activity	GO:0005622 intracellular,GO:0000151 ubiquitin ligase complex,GO:0000151 ubiquitin ligase complex	131.042	549.898	107.684	472.119	107.684	246.338	2.28761	1.19384	*		OK	OK
AHsV10001356	AHsV10001356	-	NM_001145114.1	23223	RRP12	RRP12-like protein [Source:UniProtKB/Swiss-Prot;Acc:Q5JTH9]	-	GO:0005488 binding	-	156.757	662.054	133.398	584.275	133.398	304.858	2.28532	1.1924	*		OK	OK
opHsV0400004209	opHsV0400004209	ENSG00000134352	NM_002184;NM_002184;NM_002184;NM_002184	3572	IL6ST	Interleukin-6 receptor subunit beta Precursor (IL-6R-beta)(Interleukin-6 signal transducer)(Membrane glycoprotein 130)(gp130)(CDw130)(Oncostatin-M receptor alpha subunit)(CD130 antigen) [Source:UniProtKB/Swiss-Prot;Acc:P40189]	GO:0007165 signal transduction,GO:0008284 positive regulation of cell proliferation,GO:0045768 positive regulation of anti-apoptosis,GO:0019221 cytokine and chemokine mediated signaling pathway,GO:0005977 glycogen metabolic process,GO:0008593 regulation of Notch signaling pathway,GO:0042517 positive regulation of tyrosine phosphorylation of Stat3 protein,GO:0042102 positive regulation of T cell p…	GO:0004872 receptor activity,GO:0005102 receptor binding,GO:0045509 interleukin-27 receptor activity,GO:0042803 protein homodimerization activity,GO:0004896 hematopoietin/interferon-class (D200-domain) cytokine receptor activity,GO:0004924 oncostatin-M receptor activity,GO:0004897 ciliary neurotrophic factor receptor activity,GO:0004915 interleukin-6 receptor activity,GO:0004921 interleukin-11 re…	GO:0005886 plasma membrane,GO:0016021 integral to membrane,GO:0016020 membrane,GO:0005576 extracellular region,GO:0009897 external side of plasma membrane,GO:0005900 oncostatin-M receptor complex,GO:0005896 interleukin-6 receptor complex	241.678	1032.26	218.319	954.485	218.319	498.023	2.28117	1.18977	*		OK	OK
AHsV10001521	AHsV10001521	-	NM_178584.1	151011	40422	Septin-10 [Source:UniProtKB/Swiss-Prot;Acc:Q9P0V9]	GO:0007049 cell cycle	GO:0005515 protein binding,GO:0005525 GTP binding	GO:0031105 septin complex	181.882	770.426	158.523	692.647	158.523	361.403	2.27982	1.18892	*		OK	OK
H200010710	H200010710	ENSG00000118496	NM_032145	84085	FBXO30	F-box only protein 30 [Source:UniProtKB/Swiss-Prot;Acc:Q8TB52]	GO:0006511 ubiquitin-dependent protein catabolic process	GO:0008270 zinc ion binding,GO:0046872 metal ion binding	-	221.588	943.36	198.229	865.581	198.229	451.635	2.27835	1.18799	*		OK	OK
AHsV10002139	AHsV10002139	-	NM_016125.3	51136	RNFT1	RING finger and transmembrane domain-containing protein 1 (Protein PTD016) [Source:UniProtKB/Swiss-Prot;Acc:Q5M7Z0]	-	GO:0005515 protein binding,GO:0008270 zinc ion binding,GO:0046872 metal ion binding	GO:0016020 membrane,GO:0016021 integral to membrane	326.599	1401.04	303.24	1323.26	303.24	690.438	2.27687	1.18705	*		OK	OK
H200010751	H200010751	ENSG00000196284	NM_003599;NM_003599;NM_003599;NM_003599;NM_003599	8464	SUPT3H	Transcription initiation protein SPT3 homolog (SPT3-like protein) [Source:UniProtKB/Swiss-Prot;Acc:O75486]	GO:0006366 transcription from RNA polymerase II promoter,GO:0006350 transcription,GO:0006357 regulation of transcription from RNA polymerase II promoter	GO:0003677 DNA binding,GO:0003702 RNA polymerase II transcription factor activity,GO:0016563 transcription activator activity,GO:0016986 transcription initiation factor activity	GO:0005634 nucleus,GO:0005667 transcription factor complex	182.345	771.309	158.987	693.53	158.987	361.864	2.27607	1.18654	*		OK	OK
H200013812	H200013812	ENSG00000138660	NM_018569	55435	C4orf16	Uncharacterized protein C4orf16 [Source:UniProtKB/Swiss-Prot;Acc:Q63HQ0]	-	-	-	511.861	2206.87	488.502	2129.09	488.502	1110.9	2.27409	1.18529	*		OK	OK
H200018923	H200018923	ENSG00000112096	NM_001024465;NM_001024465;NM_000636	6648	SOD2	Superoxide dismutase [Mn], mitochondrial Precursor (EC 1.15.1.1) [Source:UniProtKB/Swiss-Prot;Acc:P04179]	GO:0008285 negative regulation of cell proliferation,GO:0055114 oxidation reduction,GO:0006357 regulation of transcription from RNA polymerase II promoter,GO:0007507 heart development,GO:0003032 detection of oxygen,GO:0006801 superoxide metabolic process,GO:0042542 response to hydrogen peroxide,GO:0006302 double-strand break repair,GO:0008217 regulation of blood pressure,GO:0006749 glutathione me…	GO:0046872 metal ion binding,GO:0030145 manganese ion binding,GO:0016491 oxidoreductase activity,GO:0004784 superoxide dismutase activity	GO:0005739 mitochondrion,GO:0005759 mitochondrial matrix,GO:0005743 mitochondrial inner membrane	2180.46	9459.24	2157.11	9381.46	2157.11	4894.98	2.26924	1.18221	*		OK	OK
H200006664	H200006664	ENSG00000165030	NM_005384;NM_005384	4783	NFIL3	Nuclear factor interleukin-3-regulated protein (E4 promoter binding-protein 4)(Interleukin-3 promoter transcriptional activator)(Transcriptional activator NF-IL3A)(Interleukin-3 binding-protein 1) [Source:UniProtKB/Swiss-Prot;Acc:Q16649]	GO:0006366 transcription from RNA polymerase II promoter,GO:0006350 transcription,GO:0006355 regulation of transcription, DNA-dependent,GO:0006955 immune response,GO:0048511 rhythmic process	GO:0003700 transcription factor activity,GO:0043565 sequence-specific DNA binding,GO:0046983 protein dimerization activity,GO:0003714 transcription corepressor activity	GO:0005634 nucleus	753.507	3251.03	730.148	3173.25	730.148	1655.71	2.26764	1.18119	*		OK	OK
DHsGV10002427	DHsGV10002427	-	NM_006756.2;NM_201437.1	100289899	TCEA1P2	Transcription elongation factor A protein 1 (Transcription elongation factor S-II protein 1)(Transcription elongation factor TFIIS.o) [Source:UniProtKB/Swiss-Prot;Acc:P23193]	GO:0045944 positive regulation of transcription from RNA polymerase II promoter,GO:0006357 regulation of transcription from RNA polymerase II promoter,GO:0030218 erythrocyte differentiation,GO:0045449 regulation of transcription,GO:0006350 transcription,GO:0006354 RNA elongation,GO:0045944 positive regulation of transcription from RNA polymerase II promoter,GO:0030218 erythrocyte differentiation	GO:0005515 protein binding,GO:0003677 DNA binding,GO:0003702 RNA polymerase II transcription factor activity,GO:0016251 general RNA polymerase II transcription factor activity,GO:0030528 transcription regulator activity,GO:0008270 zinc ion binding,GO:0003676 nucleic acid binding,GO:0003711 transcription elongation regulator activity,GO:0003746 translation elongation factor activity,GO:0046872 met…	GO:0005634 nucleus,GO:0005654 nucleoplasm,GO:0005654 nucleoplasm	968.745	4184.85	945.387	4107.07	945.387	2142.95	2.26675	1.18062	*		OK	OK
H300017448	H300017448	ENSG00000113407	NM_152295	6897	TARS	Threonyl-tRNA synthetase, cytoplasmic (EC 6.1.1.3)(Threonine--tRNA ligase)(ThrRS) [Source:UniProtKB/Swiss-Prot;Acc:P26639]	GO:0006412 translation,GO:0043039 tRNA aminoacylation,GO:0006435 threonyl-tRNA aminoacylation,GO:0006418 tRNA aminoacylation for protein translation	GO:0005515 protein binding,GO:0000166 nucleotide binding,GO:0005524 ATP binding,GO:0016874 ligase activity,GO:0042803 protein homodimerization activity,GO:0016876 ligase activity, forming aminoacyl-tRNA and related compounds,GO:0004829 threonine-tRNA ligase activity,GO:0004812 aminoacyl-tRNA ligase activity	GO:0005737 cytoplasm	471.768	2022.52	448.41	1944.74	448.41	1014.71	2.26291	1.17818	*		OK	OK
H300003162	H300003162	ENSG00000180071	-	-	ANKRD18A	Ankyrin repeat domain-containing protein 18A [Source:UniProtKB/Swiss-Prot;Acc:Q8IVF6]	-	-	-	137.462	572.432	114.103	494.653	114.103	258.096	2.26195	1.17757	*		OK	OK
H200010209	H200010209	ENSG00000102908	NM_173215;NM_006599;NM_006599	10725	NFAT5	Nuclear factor of activated T-cells 5 (NF-AT5)(T-cell transcription factor NFAT5)(Tonicity-responsive enhancer-binding protein)(TonE-binding protein)(TonEBP) [Source:UniProtKB/Swiss-Prot;Acc:O94916]	GO:0007165 signal transduction,GO:0006355 regulation of transcription, DNA-dependent,GO:0045944 positive regulation of transcription from RNA polymerase II promoter,GO:0007588 excretion,GO:0045449 regulation of transcription,GO:0001816 cytokine production	GO:0005515 protein binding,GO:0003700 transcription factor activity,GO:0003702 RNA polymerase II transcription factor activity	GO:0005634 nucleus,GO:0005737 cytoplasm	210.674	889.269	187.316	811.49	187.316	423.413	2.26042	1.17659	*		OK	OK
H300006178	H300006178	ENSG00000134058	NM_001799	1022	CDK7	Cell division protein kinase 7 (EC 2.7.11.22)(EC 2.7.11.23)(CDK-activating kinase)(CAK)(CAK1)(TFIIH basal transcription factor complex kinase subunit)(39 kDa protein kinase)(P39 Mo15)(STK1) [Source:UniProtKB/Swiss-Prot;Acc:P50613]	GO:0006468 protein amino acid phosphorylation,GO:0006350 transcription,GO:0007049 cell cycle,GO:0051301 cell division,GO:0006974 response to DNA damage stimulus,GO:0008283 cell proliferation,GO:0006367 transcription initiation from RNA polymerase II promoter,GO:0045944 positive regulation of transcription from RNA polymerase II promoter,GO:0000079 regulation of cyclin-dependent protein kinase act…	GO:0016740 transferase activity,GO:0000166 nucleotide binding,GO:0005524 ATP binding,GO:0008022 protein C-terminus binding,GO:0004674 protein serine/threonine kinase activity,GO:0004713 protein tyrosine kinase activity,GO:0003713 transcription coactivator activity,GO:0004672 protein kinase activity,GO:0004693 cyclin-dependent protein kinase activity,GO:0050681 androgen receptor binding,GO:0008353…	GO:0005634 nucleus,GO:0005654 nucleoplasm	761.726	3276.28	738.368	3198.5	738.368	1668.88	2.26024	1.17647	*		OK	OK
H300022597	H300022597	ENSG00000204520	-	-	MICA	MHC class I polypeptide-related sequence A [Source:UniProtKB/TrEMBL;Acc:Q5SS58]	GO:0006955 immune response,GO:0019882 antigen processing and presentation	-	GO:0016020 membrane,GO:0042612 MHC class I protein complex	328.283	1397.13	304.925	1319.35	304.925	688.401	2.25761	1.1748	*		OK	OK
H200006556	H200006556	ENSG00000067606	NM_001033582;NM_001033582;NM_001033581	5590	PRKCZ	Protein kinase C zeta type (EC 2.7.11.13)(nPKC-zeta) [Source:UniProtKB/Swiss-Prot;Acc:Q05513]	GO:0006468 protein amino acid phosphorylation,GO:0000226 microtubule cytoskeleton organization and biogenesis	GO:0016740 transferase activity,GO:0005515 protein binding,GO:0000166 nucleotide binding,GO:0005524 ATP binding,GO:0004674 protein serine/threonine kinase activity,GO:0004713 protein tyrosine kinase activity,GO:0004672 protein kinase activity,GO:0005515 protein binding	GO:0005737 cytoplasm,GO:0005938 cell cortex,GO:0005923 tight junction,GO:0045179 apical cortex	599.592	2570.56	576.234	2492.78	576.234	1300.66	2.25718	1.17452	*		OK	OK
AHsV10000155	AHsV10000155	-	NM_019619.2	56288	PARD3	Partitioning defective 3 homolog (PARD-3)(PAR-3)(Atypical PKC isotype-specific-interacting protein)(ASIP)(CTCL tumor antigen se2-5)(PAR3-alpha) [Source:UniProtKB/Swiss-Prot;Acc:Q8TEW0]	GO:0006461 protein complex assembly,GO:0007049 cell cycle,GO:0007163 establishment or maintenance of cell polarity,GO:0007205 activation of protein kinase C activity by G-protein coupled receptor protein signaling pathway,GO:0007409 axonogenesis,GO:000835	GO:0005515 protein binding	GO:0005737 cytoplasm,GO:0005886 plasma membrane,GO:0005923 tight junction,GO:0012505 endomembrane system,GO:0030054 cell junction	223.105	939.86	199.747	862.08	199.747	449.809	2.2519	1.17114	*		OK	OK
CHsGV10000492	CHsGV10000492	-	NM_018155.2;NM_001104647.1	55186	SLC25A36	Solute carrier family 25 member 36 [Source:UniProtKB/Swiss-Prot;Acc:Q96CQ1]	GO:0032355 response to estradiol stimulus,GO:0006810 transport,GO:0006839 mitochondrial transport	GO:0005215 transporter activity,GO:0005488 binding	GO:0016021 integral to membrane,GO:0005739 mitochondrion,GO:0005743 mitochondrial inner membrane,GO:0016020 membrane	858.951	3683.06	835.592	3605.28	835.592	1881.13	2.25126	1.17073	*		OK	OK
AHsV10003227	AHsV10003227	-	NM_015599.1	5238	PGM3	Phosphoacetylglucosamine mutase (PAGM)(EC 5.4.2.3)(Acetylglucosamine phosphomutase)(N-acetylglucosamine-phosphate mutase)(Phosphoglucomutase 3) [Source:UniProtKB/Swiss-Prot;Acc:O95394]	GO:0005975 carbohydrate metabolic process,GO:0006041 glucosamine metabolic process	GO:0000287 magnesium ion binding,GO:0004610 phosphoacetylglucosamine mutase activity,GO:0016853 isomerase activity,GO:0016868 intramolecular transferase activity, phosphotransferases	GO:0005575 cellular_component	790.77	3388.77	767.411	3310.99	767.411	1727.58	2.25118	1.17068	*		OK	OK
H200005659	H200005659	ENSG00000102393	NM_000169	2717	GLA	Alpha-galactosidase A Precursor (EC 3.2.1.22)(Alpha-D-galactoside galactohydrolase)(Alpha-D-galactosidase A)(Melibiase)(Agalsidase) [Source:UniProtKB/Swiss-Prot;Acc:P06280]	GO:0005975 carbohydrate metabolic process,GO:0008152 metabolic process,GO:0009311 oligosaccharide metabolic process,GO:0051001 negative regulation of nitric-oxide synthase activity,GO:0045019 negative regulation of nitric oxide biosynthetic process,GO:0046477 glycosylceramide catabolic process,GO:0046479 glycosphingolipid catabolic process	GO:0004553 hydrolase activity, hydrolyzing O-glycosyl compounds,GO:0005102 receptor binding,GO:0043169 cation binding,GO:0042803 protein homodimerization activity,GO:0004557 alpha-galactosidase activity	GO:0005576 extracellular region,GO:0005737 cytoplasm,GO:0005794 Golgi apparatus,GO:0005764 lysosome	1117.58	4798.75	1094.22	4720.97	1094.22	2463.27	2.25117	1.17067	*		OK	OK
H300013688	H300013688	ENSG00000113712	-	1452	CSNK1A1	Casein kinase I isoform alpha (CKI-alpha)(EC 2.7.11.1)(CK1) [Source:UniProtKB/Swiss-Prot;Acc:P48729]	GO:0006468 protein amino acid phosphorylation,GO:0016055 Wnt receptor signaling pathway	GO:0016740 transferase activity,GO:0005515 protein binding,GO:0000166 nucleotide binding,GO:0005524 ATP binding,GO:0004674 protein serine/threonine kinase activity,GO:0004713 protein tyrosine kinase activity,GO:0004672 protein kinase activity	GO:0005737 cytoplasm,GO:0005829 cytosol	1026.99	4401.73	1003.63	4323.95	1003.63	2256.12	2.24796	1.16862	*		OK	OK
opHsV0400004216	opHsV0400004216	ENSG00000182400	NM_001079537	122553	TRAPPC6B	Trafficking protein particle complex subunit 6B [Source:UniProtKB/Swiss-Prot;Acc:Q86SZ2]	GO:0016192 vesicle-mediated transport	-	GO:0005794 Golgi apparatus,GO:0005783 endoplasmic reticulum	135.479	560.45	112.121	482.671	112.121	251.844	2.24618	1.16747	*		OK	OK
AHsV10000218	AHsV10000218	-	NM_016262.4	51175	TUBE1	Tubulin epsilon chain (Epsilon-tubulin) [Source:UniProtKB/Swiss-Prot;Acc:Q9UJT0]	GO:0007017 microtubule-based process,GO:0007018 microtubule-based movement,GO:0007098 centrosome cycle,GO:0051258 protein polymerization	GO:0000166 nucleotide binding,GO:0003924 GTPase activity,GO:0005198 structural molecule activity,GO:0005200 structural constituent of cytoskeleton,GO:0005525 GTP binding	GO:0000242 pericentriolar material,GO:0005874 microtubule,GO:0043234 protein complex	133.667	552.474	110.309	474.695	110.309	247.682	2.24535	1.16694	*		OK	OK
AHsV10000648	AHsV10000648	-	NM_025076.3	80146	UXS1	UDP-glucuronic acid decarboxylase 1 (EC 4.1.1.35)(UDP-glucuronate decarboxylase 1)(UXS-1)(UGD) [Source:UniProtKB/Swiss-Prot;Acc:Q8NBZ7]	GO:0005975 carbohydrate metabolic process,GO:0006694 steroid biosynthetic process,GO:0006813 potassium ion transport,GO:0008152 metabolic process,GO:0044237 cellular metabolic process,GO:0045226 extracellular polysaccharide biosynthetic process	GO:0003824 catalytic activity,GO:0003854 3-beta-hydroxy-delta5-steroid dehydrogenase activity,GO:0005488 binding,GO:0008324 cation transmembrane transporter activity,GO:0008831 dTDP-4-dehydrorhamnose reductase activity,GO:0016829 lyase activity,GO:0048040	GO:0005794 Golgi apparatus,GO:0016020 membrane,GO:0016021 integral to membrane	272.029	1147.73	248.671	1069.95	248.671	558.268	2.24501	1.16672	*		OK	OK
H300008747	H300008747	ENSG00000117758	NM_177424	23673	STX12	Syntaxin-12 [Source:UniProtKB/Swiss-Prot;Acc:Q86Y82]	GO:0006886 intracellular protein transport,GO:0016192 vesicle-mediated transport,GO:0033344 cholesterol efflux,GO:0050821 protein stabilization	GO:0005515 protein binding,GO:0005484 SNAP receptor activity	GO:0016021 integral to membrane,GO:0016020 membrane,GO:0005794 Golgi apparatus,GO:0045121 membrane raft,GO:0045335 phagocytic vesicle	140.767	582.613	117.408	504.834	117.408	263.408	2.24352	1.16576	*		OK	OK
AHsV10000883	AHsV10000883	-	NM_016433.3	51228	GLTPP1	Glycolipid transfer protein (GLTP) [Source:UniProtKB/Swiss-Prot;Acc:Q9NZD2]	GO:0046836 glycolipid transport	GO:0017089 glycolipid transporter activity,GO:0051861 glycolipid binding	GO:0005737 cytoplasm,GO:0016020 membrane	224.699	942.901	201.341	865.122	201.341	451.396	2.24195	1.16476	*		OK	OK
H200012761	H200012761	ENSG00000106993	NM_017913;NM_017913;NM_017913	-	CDC37L1	Hsp90 co-chaperone Cdc37-like 1 (Hsp90-associating relative of Cdc37) [Source:UniProtKB/Swiss-Prot;Acc:Q7L3B6]	GO:0051301 cell division	-	-	145.527	602.605	122.168	524.825	122.168	273.839	2.24149	1.16446	*		OK	OK
AHsV10002229	AHsV10002229	-	NM_015005.1	283638	KIAA0284	Protein KIAA0284 [Source:UniProtKB/Swiss-Prot;Acc:Q9Y4F5]	-	-	-	254.117	1068.93	230.758	991.153	230.758	517.155	2.24111	1.16422	*		OK	OK
AHsV10003114	AHsV10003114	-	NM_020141.3	56900	TMEM167B	Transmembrane protein 167B Precursor [Source:UniProtKB/Swiss-Prot;Acc:Q9NRX6]	-	-	-	202.728	847.521	179.369	769.742	179.369	401.629	2.23912	1.16293	*		OK	OK
opHsV0400007260	opHsV0400007260	ENSG00000168522	NM_002027;NM_002027	2339	FNTA	Protein farnesyltransferase/geranylgeranyltransferase type-1 subunit alpha (EC 2.5.1.58)(EC 2.5.1.59)(CAAX farnesyltransferase subunit alpha)(Ras proteins prenyltransferase alpha)(FTase-alpha)(Type I protein geranyl-geranyltransferase subunit alpha)(GGTase-I-alpha) [Source:UniProtKB/Swiss-Prot;Acc:P49354]	GO:0007179 transforming growth factor beta receptor signaling pathway,GO:0018346 protein amino acid prenylation,GO:0045213 neurotransmitter receptor metabolic process,GO:0018348 protein amino acid geranylgeranylation,GO:0018347 protein amino acid farnesylation	GO:0016740 transferase activity,GO:0005515 protein binding,GO:0008318 protein prenyltransferase activity,GO:0004660 protein farnesyltransferase activity,GO:0004662 CAAX-protein geranylgeranyltransferase activity,GO:0030548 acetylcholine receptor regulator activity,GO:0005515 protein binding	GO:0005737 cytoplasm,GO:0005829 cytosol	461.112	1955.66	437.753	1877.88	437.753	979.824	2.2383	1.16241	*		OK	OK
opHsV0400005656	opHsV0400005656	ENSG00000198355	NM_001001852	415116	PIM3	Serine/threonine-protein kinase Pim-3 (EC 2.7.11.1) [Source:UniProtKB/Swiss-Prot;Acc:Q86V86]	GO:0006468 protein amino acid phosphorylation	GO:0016740 transferase activity,GO:0000166 nucleotide binding,GO:0005524 ATP binding,GO:0004674 protein serine/threonine kinase activity,GO:0004713 protein tyrosine kinase activity,GO:0004672 protein kinase activity	-	144.393	596.936	121.034	519.157	121.034	270.882	2.23805	1.16224	*		OK	OK
AHsV10002305	AHsV10002305	-	NM_023011.2	65110	UPF3A	Regulator of nonsense transcripts 3A (Nonsense mRNA reducing factor 3A)(Up-frameshift suppressor 3 homolog A)(hUpf3) [Source:UniProtKB/Swiss-Prot;Acc:Q9H1J1]	GO:0000184 nuclear-transcribed mRNA catabolic process, nonsense-mediated decay,GO:0006810 transport,GO:0051028 mRNA transport	GO:0000166 nucleotide binding,GO:0003723 RNA binding,GO:0005487 nucleocytoplasmic transporter activity,GO:0005515 protein binding	GO:0005634 nucleus,GO:0005737 cytoplasm	185.159	771.139	161.8	693.36	161.8	361.776	2.23594	1.16088	*		OK	OK
CHsGV10002619	CHsGV10002619	-	NM_001015882.2	548645	DNAJC25	DnaJ homolog subfamily C member 25 [Source:UniProtKB/Swiss-Prot;Acc:Q9H1X3]	-	GO:0031072 heat shock protein binding	GO:0016021 integral to membrane,GO:0016020 membrane	211.917	885.374	188.559	807.595	188.559	421.38	2.23474	1.16011	*		OK	OK
H300021494	H300021494	ENSG00000078246	NM_003324	7289	TULP3	Tubby-related protein 3 (Tubby-like protein 3) [Source:UniProtKB/Swiss-Prot;Acc:O75386]	GO:0006355 regulation of transcription, DNA-dependent,GO:0007186 G-protein coupled receptor protein signaling pathway	GO:0005546 phosphatidylinositol-4,5-bisphosphate binding	GO:0005886 plasma membrane,GO:0005634 nucleus	124.307	510.057	100.949	432.278	100.949	225.551	2.2343	1.15982	*		OK	OK
H200003331	H200003331	ENSG00000177311	NM_001080412	253461	ZBTB38	Zinc finger and BTB domain-containing protein 38 [Source:UniProtKB/Swiss-Prot;Acc:Q8NAP3]	GO:0006350 transcription,GO:0006355 regulation of transcription, DNA-dependent,GO:0045944 positive regulation of transcription from RNA polymerase II promoter,GO:0045944 positive regulation of transcription from RNA polymerase II promoter	GO:0005515 protein binding,GO:0008270 zinc ion binding,GO:0046872 metal ion binding,GO:0003700 transcription factor activity,GO:0003676 nucleic acid binding,GO:0003700 transcription factor activity	GO:0005634 nucleus,GO:0005622 intracellular,GO:0005634 nucleus	139.869	576.688	116.511	498.909	116.511	260.316	2.23427	1.1598	*		OK	OK
AHsV10000816	AHsV10000816	-	NM_003818.2	8760	CDS2	Phosphatidate cytidylyltransferase 2 (EC 2.7.7.41)(CDP-diglyceride pyrophosphorylase 2)(CDP-diglyceride synthetase 2)(CDP-diacylglycerol synthase 2)(CDS 2)(CTP:phosphatidate cytidylyltransferase 2)(CDP-DG synthetase 2)(CDP-DAG synthase 2) [Source:UniProtK	GO:0008654 phospholipid biosynthetic process	GO:0004605 phosphatidate cytidylyltransferase activity,GO:0016772 transferase activity, transferring phosphorus-containing groups	GO:0005739 mitochondrion,GO:0005743 mitochondrial inner membrane,GO:0016020 membrane,GO:0016021 integral to membrane	251.595	1054.25	228.236	976.466	228.236	509.492	2.2323	1.15853	*		OK	OK
AHsV10000187	AHsV10000187	-	NM_002862.3	5834	PYGB	Glycogen phosphorylase, brain form (EC 2.4.1.1) [Source:UniProtKB/Swiss-Prot;Acc:P11216]	GO:0005975 carbohydrate metabolic process,GO:0005980 glycogen catabolic process	GO:0004645 phosphorylase activity,GO:0008184 glycogen phosphorylase activity,GO:0016757 transferase activity, transferring glycosyl groups,GO:0030170 pyridoxal phosphate binding	GO:0005737 cytoplasm	177.183	735.448	153.824	657.669	153.824	343.153	2.23081	1.15757	*		OK	OK
H300013929	H300013929	ENSG00000104231	NM_024699	79752	ZFAND1	AN1-type zinc finger protein 1 [Source:UniProtKB/Swiss-Prot;Acc:Q8TCF1]	-	GO:0008270 zinc ion binding,GO:0046872 metal ion binding	-	339.835	1429.96	316.477	1352.18	316.477	705.528	2.22932	1.1566	*		OK	OK
H300018540	H300018540	ENSG00000065613	NM_014720;NM_014720	-	SLK	STE20-like serine/threonine-protein kinase (STE20-like kinase)(hSLK)(EC 2.7.11.1)(STE20-related serine/threonine-protein kinase)(STE20-related kinase)(Serine/threonine-protein kinase 2)(CTCL tumor antigen se20-9) [Source:UniProtKB/Swiss-Prot;Acc:Q9H2G2]	GO:0006468 protein amino acid phosphorylation,GO:0006289 nucleotide-excision repair	GO:0003677 DNA binding,GO:0005524 ATP binding,GO:0004674 protein serine/threonine kinase activity,GO:0004713 protein tyrosine kinase activity,GO:0004518 nuclease activity,GO:0004672 protein kinase activity	-	142.542	586.227	119.183	508.448	119.183	265.294	2.22593	1.15441	*		OK	OK
opHsV0400002318	opHsV0400002318	ENSG00000182534	NM_001008529;NM_001008529;NM_001008529	-	MXRA7	Matrix-remodeling-associated protein 7 (Transmembrane anchor protein 1) [Source:UniProtKB/Swiss-Prot;Acc:P84157]	-	-	-	323.057	1356.16	299.698	1278.38	299.698	667.024	2.22565	1.15423	*		OK	OK
opHsV0400002476	opHsV0400002476	ENSG00000215093	-	-	AL109752.14	-	-	-	-	556.89	2353.38	533.531	2275.6	533.531	1187.34	2.22544	1.15409	*		OK	OK
H300019110	H300019110	ENSG00000125952	NM_002382;NM_002382;NM_145114;NM_145114;NM_145114;NM_145114	4149	MAX	Protein max (Myc-associated factor X) [Source:UniProtKB/Swiss-Prot;Acc:P61244]	GO:0006366 transcription from RNA polymerase II promoter,GO:0006355 regulation of transcription, DNA-dependent,GO:0045449 regulation of transcription	GO:0005515 protein binding,GO:0003700 transcription factor activity,GO:0030528 transcription regulator activity,GO:0003713 transcription coactivator activity	GO:0005634 nucleus	210.779	876.597	187.42	798.818	187.42	416.8	2.22388	1.15308	*		OK	OK
H200015593	H200015593	ENSG00000138459	NM_017945	55032	SLC35A5	Probable UDP-sugar transporter protein SLC35A5 (Solute carrier family 35 member A5) [Source:UniProtKB/Swiss-Prot;Acc:Q9BS91]	GO:0008643 carbohydrate transport,GO:0015780 nucleotide-sugar transport	GO:0005351 sugar:hydrogen symporter activity,GO:0005338 nucleotide-sugar transmembrane transporter activity	GO:0016021 integral to membrane,GO:0016020 membrane,GO:0000139 Golgi membrane	142.407	584.997	119.048	507.218	119.048	264.652	2.22306	1.15255	*		OK	OK
H200000560	H200000560	ENSG00000153879	NM_001806	1054	CEBPG	CCAAT/enhancer-binding protein gamma (C/EBP gamma) [Source:UniProtKB/Swiss-Prot;Acc:P53567]	GO:0006350 transcription,GO:0006355 regulation of transcription, DNA-dependent,GO:0006955 immune response,GO:0006357 regulation of transcription from RNA polymerase II promoter,GO:0001889 liver development,GO:0051091 positive regulation of transcription factor activity,GO:0045078 positive regulation of interferon-gamma biosynthetic process,GO:0030183 B cell differentiation,GO:0043433 negative reg…	GO:0003700 transcription factor activity,GO:0043565 sequence-specific DNA binding,GO:0008134 transcription factor binding,GO:0046983 protein dimerization activity,GO:0046982 protein heterodimerization activity,GO:0046982 protein heterodimerization activity	GO:0005634 nucleus	320.462	1340.15	297.104	1262.37	297.104	658.668	2.21696	1.14858	*		OK	OK
H300018612	H300018612	ENSG00000097033	NM_016009	-	SH3GLB1	Endophilin-B1 (SH3 domain-containing GRB2-like protein B1)(Bax-interacting factor 1)(Bif-1) [Source:UniProtKB/Swiss-Prot;Acc:Q9Y371]	-	GO:0005515 protein binding	GO:0005737 cytoplasm	450.635	1891.93	427.276	1814.15	427.276	946.571	2.21536	1.14754	*		OK	OK
opHsV0400004145	opHsV0400004145	ENSG00000188566	NM_014434;NM_014434	-	NDOR1	NADPH-dependent diflavin oxidoreductase 1 (EC 1.6.-.-)(Novel reductase 1)(NADPH-dependent FMN and FAD containing oxidoreductase) [Source:UniProtKB/Swiss-Prot;Acc:Q9UHB4]	-	GO:0005506 iron ion binding,GO:0016491 oxidoreductase activity,GO:0009055 electron carrier activity,GO:0010181 FMN binding	-	184.462	761.559	161.104	683.78	161.104	356.777	2.21458	1.14703	*		OK	OK
H200002325	H200002325	ENSG00000143970	-	55252	ASXL2	Putative Polycomb group protein ASXL2 (Additional sex combs-like protein 2) [Source:UniProtKB/Swiss-Prot;Acc:Q76L83]	GO:0006350 transcription,GO:0006355 regulation of transcription, DNA-dependent	GO:0008270 zinc ion binding,GO:0046872 metal ion binding	GO:0005634 nucleus	341.857	1428.38	318.499	1350.6	318.499	704.704	2.21258	1.14573	*		OK	OK
H300021414	H300021414	ENSG00000145495	NM_005885	-	40608	E3 ubiquitin-protein ligase MARCH6 (EC 6.3.2.-)(Membrane-associated RING finger protein 6)(Membrane-associated RING-CH protein VI)(MARCH-VI)(RING finger protein 176)(Protein TEB-4)(Doa10 homolog) [Source:UniProtKB/Swiss-Prot;Acc:O60337]	-	GO:0008270 zinc ion binding	-	291.049	1212.73	267.691	1134.95	267.691	592.185	2.2122	1.14548	*		OK	OK
H300020287	H300020287	ENSG00000144674	-	-	GOLGA4	Golgin subfamily A member 4 (Trans-Golgi p230)(256 kDa golgin)(Golgin-245)(Protein 72.1) [Source:UniProtKB/Swiss-Prot;Acc:Q13439]	-	GO:0000166 nucleotide binding,GO:0031177 phosphopantetheine binding	-	418.51	1752.34	395.152	1674.56	395.152	873.74	2.21115	1.1448	*		OK	OK
H200001097	H200001097	ENSG00000198408	NM_012215	10724	MGEA5	Bifunctional protein NCOAT (Nuclear cytoplasmic O-GlcNAcase and acetyltransferase)(Meningioma-expressed antigen 5) [Includes Beta-hexosaminidase(EC 3.2.1.52)(N-acetyl-beta-glucosaminidase)(Beta-N-acetylhexosaminidase)(Hexosaminidase C)(N-acetyl-beta-D-glucosaminidase)(O-GlcNAcase);Histone acetyltransferase(HAT)(EC 2.3.1.48)] [Source:UniProtKB/Swiss-Prot;Acc:O60502]	-	-	-	187.53	772.869	164.171	695.09	164.171	362.678	2.20914	1.14349	*		OK	OK
H200009932	H200009932	ENSG00000167470	NM_177401;NM_177401	90007	MIDN	Midnolin (Midbrain nucleolar protein) [Source:UniProtKB/Swiss-Prot;Acc:Q504T8]	GO:0006464 protein modification process	-	GO:0005634 nucleus,GO:0005730 nucleolus	364.946	1522.12	341.588	1444.34	341.588	753.614	2.20621	1.14157	*		OK	OK
H200002099	H200002099	ENSG00000149798	NM_006779	10435	CDC42EP2	Cdc42 effector protein 2 (Binder of Rho GTPases 1) [Source:UniProtKB/Swiss-Prot;Acc:O14613]	GO:0008360 regulation of cell shape,GO:0007015 actin filament organization,GO:0030838 positive regulation of actin filament polymerization,GO:0031274 positive regulation of pseudopodium formation,GO:0031334 positive regulation of protein complex assembly	GO:0005515 protein binding,GO:0005100 Rho GTPase activator activity,GO:0017049 GTP-Rho binding,GO:0001515 opioid peptide activity	GO:0005886 plasma membrane,GO:0005856 cytoskeleton,GO:0005737 cytoplasm,GO:0012505 endomembrane system	163.988	672.324	140.63	594.545	140.63	310.217	2.20591	1.14137	*		OK	OK
opHsV0400003018	opHsV0400003018	ENSG00000101004	NM_025176	-	KIAA0980	Ninein-like protein [Source:UniProtKB/Swiss-Prot;Acc:Q9Y2I6]	-	-	-	136.382	555.518	113.024	477.739	113.024	249.271	2.20547	1.14109	*		OK	OK
opHsV0400006839	opHsV0400006839	ENSG00000109790	NM_015990;NM_015990;NM_015990	51088	KLHL5	Kelch-like protein 5 [Source:UniProtKB/Swiss-Prot;Acc:Q96PQ7]	-	GO:0005515 protein binding	-	143.634	585.631	120.275	507.852	120.275	264.983	2.20314	1.13956	*		OK	OK
CHsGV10002126	CHsGV10002126	-	NM_007235.3	11260	XPOT	Exportin-T (tRNA exportin)(Exportin(tRNA)) [Source:UniProtKB/Swiss-Prot;Acc:O43592]	GO:0006810 transport,GO:0006409 tRNA export from nucleus	GO:0000049 tRNA binding,GO:0005488 binding	GO:0005737 cytoplasm,GO:0005634 nucleus,GO:0005654 nucleoplasm,GO:0005643 nuclear pore	249.506	1028.3	226.147	950.524	226.147	495.956	2.19307	1.13295	*		OK	OK
H200008273	H200008273	ENSG00000159128	NM_005534	-	IFNGR2	Interferon-gamma receptor beta chain Precursor (Interferon-gamma receptor accessory factor 1)(AF-1)(Interferon-gamma transducer 1) [Source:UniProtKB/Swiss-Prot;Acc:P38484]	-	GO:0004872 receptor activity	-	532.47	2216.61	509.111	2138.83	509.111	1115.98	2.19202	1.13226	*		OK	OK
H200009202	H200009202	ENSG00000107175	NM_006368	10488	CREB3	Cyclic AMP-responsive element-binding protein 3 (Luman protein)(Transcription factor LZIP-alpha) [Contains Processed cyclic AMP-responsive element-binding protein 3] [Source:UniProtKB/Swiss-Prot;Acc:O43889]	GO:0006355 regulation of transcription, DNA-dependent,GO:0044419 interspecies interaction between organisms,GO:0006935 chemotaxis,GO:0045449 regulation of transcription	GO:0003677 DNA binding,GO:0003700 transcription factor activity,GO:0043565 sequence-specific DNA binding,GO:0046983 protein dimerization activity	GO:0016021 integral to membrane,GO:0016020 membrane,GO:0005634 nucleus,GO:0005783 endoplasmic reticulum,GO:0005789 endoplasmic reticulum membrane	308.803	1276.47	285.445	1198.69	285.445	625.444	2.19112	1.13167	*		OK	OK
H200010737	H200010737	ENSG00000123091	NM_014372	26994	RNF11	RING finger protein 11 (Sid 1669) [Source:UniProtKB/Swiss-Prot;Acc:Q9Y3C5]	GO:0042787 protein ubiquitination during ubiquitin-dependent protein catabolic process	GO:0003677 DNA binding,GO:0005515 protein binding,GO:0008270 zinc ion binding,GO:0046872 metal ion binding	GO:0000151 ubiquitin ligase complex	162.981	663.729	139.622	585.95	139.622	305.732	2.18971	1.13074	*		OK	OK
AHsV10000737	AHsV10000737	-	NM_001001330.1	221035	REEP3	Receptor expression-enhancing protein 3 [Source:UniProtKB/Swiss-Prot;Acc:Q6NUK4]	-	-	GO:0016020 membrane,GO:0016021 integral to membrane	357.51	1480.08	334.152	1402.3	334.152	731.678	2.18966	1.13071	*		OK	OK
H200017874	H200017874	ENSG00000144645	NM_017784	114884	OSBPL10	Oxysterol-binding protein-related protein 10 (OSBP-related protein 10)(ORP-10) [Source:UniProtKB/Swiss-Prot;Acc:Q9BXB5]	GO:0006869 lipid transport,GO:0008202 steroid metabolic process	-	GO:0005886 plasma membrane,GO:0005634 nucleus,GO:0005737 cytoplasm,GO:0005794 Golgi apparatus	258.489	1064.49	235.131	986.714	235.131	514.839	2.18959	1.13066	*		OK	OK
H200004445	H200004445	ENSG00000164576	NM_024632	79685	SAP30L	Histone deacetylase complex subunit SAP30L (Sin3A-associated protein p30-like protein)(Sin3 corepressor complex subunit SAP30L)(HCV non-structural protein 4A-transactivated protein 2) [Source:UniProtKB/Swiss-Prot;Acc:Q9HAJ7]	GO:0006350 transcription,GO:0006355 regulation of transcription, DNA-dependent	-	GO:0005634 nucleus	388.805	1611.14	365.446	1533.36	365.446	800.063	2.18927	1.13045	*		OK	OK
H300002100	H300002100	ENSG00000136986	NM_024295	79139	DERL1	Derlin-1 (Der1-like protein 1)(Degradation in endoplasmic reticulum protein 1)(DERtrin-1) [Source:UniProtKB/Swiss-Prot;Acc:Q9BUN8]	GO:0015031 protein transport,GO:0044419 interspecies interaction between organisms,GO:0030968 endoplasmic reticulum unfolded protein response,GO:0006986 response to unfolded protein,GO:0030433 ER-associated protein catabolic process,GO:0030970 retrograde protein transport, ER to cytosol,GO:0019060 intracellular transport of viral proteins in host cell	GO:0005515 protein binding,GO:0004872 receptor activity,GO:0042288 MHC class I protein binding	GO:0016021 integral to membrane,GO:0016020 membrane,GO:0005783 endoplasmic reticulum,GO:0005789 endoplasmic reticulum membrane,GO:0030176 integral to endoplasmic reticulum membrane	386.29	1600.39	362.932	1522.61	362.932	794.455	2.18899	1.13027	*		OK	OK
H200001082	H200001082	ENSG00000175582	NM_002869;NM_002869	5870	RAB6A	Ras-related protein Rab-6A (Rab-6) [Source:UniProtKB/Swiss-Prot;Acc:P20340]	GO:0007165 signal transduction,GO:0015031 protein transport,GO:0007264 small GTPase mediated signal transduction,GO:0006886 intracellular protein transport,GO:0006913 nucleocytoplasmic transport	GO:0005515 protein binding,GO:0005525 GTP binding,GO:0003924 GTPase activity	GO:0005622 intracellular	366.69	1517.63	343.331	1439.85	343.331	751.275	2.18819	1.12974	*		OK	OK
opHsV0400006338	opHsV0400006338	ENSG00000170242	NM_017944	55031	USP47	Ubiquitin carboxyl-terminal hydrolase 47 (EC 3.1.2.15)(Ubiquitin thioesterase 47)(Ubiquitin-specific-processing protease 47)(Deubiquitinating enzyme 47) [Source:UniProtKB/Swiss-Prot;Acc:Q96K76]	GO:0006511 ubiquitin-dependent protein catabolic process	GO:0004221 ubiquitin thiolesterase activity	-	155.532	631.632	132.174	553.853	132.174	288.985	2.1864	1.12856	*		OK	OK
AHsV10003387	AHsV10003387	-	NM_004278.3	9487	PIGL	N-acetylglucosaminyl-phosphatidylinositol de-N-acetylase (EC 3.5.1.89)(Phosphatidylinositol-glycan biosynthesis class L protein)(PIG-L) [Source:UniProtKB/Swiss-Prot;Acc:Q9Y2B2]	GO:0016254 preassembly of GPI anchor in ER membrane	GO:0000225 N-acetylglucosaminylphosphatidylinositol deacetylase activity,GO:0016787 hydrolase activity	GO:0005783 endoplasmic reticulum,GO:0005789 endoplasmic reticulum membrane,GO:0016020 membrane,GO:0016021 integral to membrane	153.937	624.868	130.579	547.089	130.579	285.455	2.18608	1.12835	*		OK	OK
H200004904	H200004904	ENSG00000121749	NM_022771	64786	TBC1D15	TBC1 domain family member 15 [Source:UniProtKB/Swiss-Prot;Acc:Q8TC07]	GO:0032313 regulation of Rab GTPase activity	GO:0005096 GTPase activator activity,GO:0005097 Rab GTPase activator activity	GO:0005622 intracellular,GO:0005739 mitochondrion	127.468	513.739	104.109	435.96	104.109	227.471	2.18493	1.12759	*		OK	OK
AHsV10001969	AHsV10001969	-	NM_018403.4	55802	DCP1A	mRNA-decapping enzyme 1A (EC 3.-.-.-)(Transcription factor SMIF)(Smad4-interacting transcriptional co-activator) [Source:UniProtKB/Swiss-Prot;Acc:Q9NPI6]	GO:0000184 nuclear-transcribed mRNA catabolic process, nonsense-mediated decay	GO:0005515 protein binding,GO:0016787 hydrolase activity	GO:0005634 nucleus,GO:0005737 cytoplasm	213.844	875.21	190.486	797.431	190.486	416.077	2.1843	1.12717	*		OK	OK
AHsV10002666	AHsV10002666	-	NM_145246.3	118924	C10orf4	Protein FRA10AC1 [Source:UniProtKB/Swiss-Prot;Acc:Q70Z53]	-	GO:0005515 protein binding	GO:0005634 nucleus	292.071	1202.02	268.712	1124.24	268.712	586.598	2.18299	1.12631	*		OK	OK
H200005663	H200005663	ENSG00000144161	-	84524	ZC3H8	Zinc finger CCCH domain-containing protein 8 [Source:UniProtKB/Swiss-Prot;Acc:Q8N5P1]	-	GO:0008270 zinc ion binding,GO:0046872 metal ion binding,GO:0003676 nucleic acid binding	GO:0005634 nucleus	145.31	587.334	121.951	509.555	121.951	265.871	2.18015	1.12443	*		OK	OK
AHsV10000008	AHsV10000008	-	NM_004582.2	5876	RABGGTB	Geranylgeranyl transferase type-2 subunit beta (EC 2.5.1.60)(Geranylgeranyl transferase type II subunit beta)(GGTase-II-beta)(Type II protein geranyl-geranyltransferase subunit beta)(Rab geranylgeranyltransferase subunit beta)(Rab geranyl-geranyltransfera	GO:0006464 protein modification process,GO:0007601 visual perception,GO:0018348 protein amino acid geranylgeranylation	GO:0003824 catalytic activity,GO:0004659 prenyltransferase activity,GO:0004663 Rab geranylgeranyltransferase activity,GO:0005515 protein binding,GO:0008270 zinc ion binding,GO:0016740 transferase activity,GO:0046872 metal ion binding	-	2998.68	12507.6	2975.32	12429.9	2975.32	6485.55	2.17978	1.12418	*		OK	OK
CHsGV10003239	CHsGV10003239	-	NM_001142286.1;NM_024624.5	79677	SMC6	Structural maintenance of chromosomes protein 6 (hSMC6) [Source:UniProtKB/Swiss-Prot;Acc:Q96SB8]	GO:0006281 DNA repair,GO:0006974 response to DNA damage stimulus,GO:0006310 DNA recombination	GO:0005524 ATP binding,GO:0000166 nucleotide binding	GO:0005634 nucleus,GO:0005622 intracellular,GO:0005694 chromosome	199.31	812.188	175.951	734.409	175.951	383.194	2.17784	1.1229	*		OK	OK
H200015382	H200015382	ENSG00000011566	NM_003618	-	MAP4K3	Mitogen-activated protein kinase kinase kinase kinase 3 (EC 2.7.11.1)(MAPK/ERK kinase kinase kinase 3)(MEK kinase kinase 3)(MEKKK 3)(Germinal center kinase-related protein kinase)(GLK) [Source:UniProtKB/Swiss-Prot;Acc:Q8IVH8]	GO:0006468 protein amino acid phosphorylation	GO:0005524 ATP binding,GO:0004674 protein serine/threonine kinase activity,GO:0004713 protein tyrosine kinase activity,GO:0004672 protein kinase activity,GO:0005083 small GTPase regulator activity	-	242.422	990.528	219.064	912.749	219.064	476.246	2.17401	1.12036	*		OK	OK
H200006250	H200006250	ENSG00000109079	NM_021137	7126	TNFAIP1	BTB/POZ domain-containing protein TNFAIP1 (Tumor necrosis factor, alpha-induced protein 1, endothelial)(Protein B12) [Source:UniProtKB/Swiss-Prot;Acc:Q13829]	GO:0006813 potassium ion transport,GO:0006955 immune response,GO:0009790 embryonic development,GO:0006260 DNA replication,GO:0006260 DNA replication	GO:0005515 protein binding,GO:0003674 molecular_function,GO:0005249 voltage-gated potassium channel activity,GO:0005515 protein binding	GO:0016020 membrane,GO:0005575 cellular_component,GO:0008076 voltage-gated potassium channel complex	161.785	653.998	138.426	576.219	138.426	300.655	2.17195	1.11899	*		OK	OK
H200006042	H200006042	ENSG00000129473	NM_004050	599	BCL2L2	Apoptosis regulator Bcl-W (Bcl-2-like 2 protein) [Source:UniProtKB/Swiss-Prot;Acc:Q92843]	GO:0042981 regulation of apoptosis,GO:0007283 spermatogenesis,GO:0006916 anti-apoptosis	GO:0005515 protein binding	GO:0016020 membrane,GO:0005737 cytoplasm,GO:0005739 mitochondrion,GO:0031966 mitochondrial membrane	216.401	880.922	193.043	803.143	193.043	419.057	2.1708	1.11823	*		OK	OK
H200005480	H200005480	ENSG00000111711	NM_016072	51026	GOLT1B	Vesicle transport protein GOT1B (Golgi transport 1 homolog B)(hGOT1a)(Putative NF-kappa-B-activating protein 470) [Source:UniProtKB/Swiss-Prot;Acc:Q9Y3E0]	GO:0015031 protein transport,GO:0006813 potassium ion transport,GO:0043123 positive regulation of I-kappaB kinase/NF-kappaB cascade,GO:0016192 vesicle-mediated transport	GO:0005249 voltage-gated potassium channel activity,GO:0004871 signal transducer activity	GO:0016021 integral to membrane,GO:0016020 membrane,GO:0005794 Golgi apparatus,GO:0000139 Golgi membrane,GO:0005783 endoplasmic reticulum,GO:0008076 voltage-gated potassium channel complex	227.667	927.228	204.309	849.449	204.309	443.218	2.16935	1.11727	*		OK	OK
opHsV0400000683	opHsV0400000683	ENSG00000166483	NM_003390	7465	WEE1	Wee1-like protein kinase (EC 2.7.10.2)(Wee1A kinase)(WEE1hu) [Source:UniProtKB/Swiss-Prot;Acc:P30291]	GO:0006468 protein amino acid phosphorylation,GO:0007049 cell cycle,GO:0007067 mitosis,GO:0051301 cell division	GO:0016740 transferase activity,GO:0000287 magnesium ion binding,GO:0005515 protein binding,GO:0000166 nucleotide binding,GO:0005524 ATP binding,GO:0004674 protein serine/threonine kinase activity,GO:0004713 protein tyrosine kinase activity,GO:0004672 protein kinase activity,GO:0004715 non-membrane spanning protein tyrosine kinase activity	GO:0005634 nucleus,GO:0005654 nucleoplasm	129.306	518.177	105.947	440.398	105.947	229.787	2.16888	1.11695	*		OK	OK
CHsGV10001693	CHsGV10001693	-	NM_015515.3	25984	KRT23	Keratin, type I cytoskeletal 23 (Cytokeratin-23)(CK-23)(Keratin-23)(K23) [Source:UniProtKB/Swiss-Prot;Acc:Q9C075]	-	GO:0005198 structural molecule activity	GO:0005882 intermediate filament	172.492	697.346	149.133	619.566	149.133	323.272	2.16767	1.11615	*		OK	OK
H200000927	H200000927	ENSG00000179562	NM_024523	79571	GCC1	GRIP and coiled-coil domain-containing protein 1 (Golgi coiled-coil protein 1) [Source:UniProtKB/Swiss-Prot;Acc:Q96CN9]	GO:0007165 signal transduction,GO:0006935 chemotaxis	GO:0005515 protein binding,GO:0004871 signal transducer activity	GO:0016020 membrane,GO:0005737 cytoplasm,GO:0005794 Golgi apparatus,GO:0000139 Golgi membrane	126.056	504.415	102.697	426.636	102.697	222.607	2.16759	1.1161	*		OK	OK
H300002301	H300002301	ENSG00000188290	NM_021170	57801	HES4	Transcription factor HES-4 (Hairy and enhancer of split 4)(bHLH factor Hes4) [Source:UniProtKB/Swiss-Prot;Acc:Q9HCC6]	GO:0006355 regulation of transcription, DNA-dependent,GO:0007275 multicellular organismal development,GO:0007399 nervous system development,GO:0030154 cell differentiation,GO:0045449 regulation of transcription	GO:0003677 DNA binding,GO:0030528 transcription regulator activity	GO:0005634 nucleus	235.228	957.866	211.869	880.087	211.869	459.204	2.16739	1.11596	*		OK	OK
opHsV0400003201	opHsV0400003201	ENSG00000155366	NM_175744;NM_175744	389	RHOC	Rho-related GTP-binding protein RhoC Precursor (H9) [Source:UniProtKB/Swiss-Prot;Acc:P08134]	GO:0007165 signal transduction,GO:0015031 protein transport,GO:0007264 small GTPase mediated signal transduction,GO:0043123 positive regulation of I-kappaB kinase/NF-kappaB cascade,GO:0006886 intracellular protein transport,GO:0006913 nucleocytoplasmic transport	GO:0005515 protein binding,GO:0000166 nucleotide binding,GO:0005525 GTP binding,GO:0003924 GTPase activity,GO:0004871 signal transducer activity	GO:0005886 plasma membrane,GO:0016020 membrane,GO:0005622 intracellular	396.867	1629.26	373.509	1551.48	373.509	809.518	2.16733	1.11592	*		OK	OK
H200007291	H200007291	ENSG00000115020	NM_152671;NM_152671	200576	PIP5K3	FYVE finger-containing phosphoinositide kinase (EC 2.7.1.68)(PIKfyve)(1-phosphatidylinositol-4-phosphate 5-kinase)(PtdIns(4)P-5-kinase)(PIP5K)(Phosphatidylinositol-3-phosphate 5-kinase type III)(p235) [Source:UniProtKB/Swiss-Prot;Acc:Q9Y2I7]	GO:0007242 intracellular signaling cascade,GO:0044267 cellular protein metabolic process,GO:0046488 phosphatidylinositol metabolic process,GO:0042147 retrograde transport, endosome to Golgi,GO:0045184 establishment of protein localization	GO:0016740 transferase activity,GO:0005515 protein binding,GO:0008270 zinc ion binding,GO:0005524 ATP binding,GO:0046872 metal ion binding,GO:0016301 kinase activity,GO:0016308 1-phosphatidylinositol-4-phosphate 5-kinase activity,GO:0016307 phosphatidylinositol phosphate kinase activity	GO:0016020 membrane,GO:0005768 endosome,GO:0031901 early endosome membrane,GO:0045121 membrane raft	162.405	654.953	139.046	577.174	139.046	301.153	2.16585	1.11493	*		OK	OK
CHsGV10003226	CHsGV10003226	-	NM_018981.1	54431	DNAJC10	DnaJ homolog subfamily C member 10 Precursor (ER-resident protein ERdj5)(Macrothioredoxin)(MTHr) [Source:UniProtKB/Swiss-Prot;Acc:Q8IXB1]	GO:0006457 protein folding,GO:0045454 cell redox homeostasis	GO:0051082 unfolded protein binding,GO:0031072 heat shock protein binding	GO:0005788 endoplasmic reticulum lumen,GO:0005783 endoplasmic reticulum,GO:0005576 extracellular region	490.812	2015.65	467.453	1937.87	467.453	1011.13	2.16306	1.11307	*		OK	OK
AHsV10001106	AHsV10001106	-	NM_017619.3	55599	RNPC3	RNA-binding protein 40 (RNA-binding motif protein 40)(RNA-binding region-containing protein 3)(U11/U12 small nuclear ribonucleoprotein 65 KDa protein)(U11/U12 snRNP 65 KDa protein)(U11/U12-65K) [Source:UniProtKB/Swiss-Prot;Acc:Q96LT9]	GO:0006397 mRNA processing,GO:0008380 RNA splicing	GO:0000166 nucleotide binding,GO:0003676 nucleic acid binding,GO:0003723 RNA binding	GO:0005634 nucleus,GO:0005681 spliceosome	143.232	574.611	119.873	496.832	119.873	259.233	2.16256	1.11274	*		OK	OK
H300019330	H300019330	ENSG00000133103	NM_020751	57511	COG6	Conserved oligomeric Golgi complex subunit 6 (COG complex subunit 6)(Component of oligomeric Golgi complex 6) [Source:UniProtKB/Swiss-Prot;Acc:Q9Y2V7]	GO:0015031 protein transport	-	GO:0016020 membrane,GO:0005794 Golgi apparatus,GO:0000139 Golgi membrane,GO:0017119 Golgi transport complex	156.883	631.048	133.525	553.268	133.525	288.68	2.16199	1.11236	*		OK	OK
H200017198	H200017198	ENSG00000197956	NM_014624;NM_014624	6277	S100A6	Protein S100-A6 (S100 calcium-binding protein A6)(Calcyclin)(Prolactin receptor-associated protein)(PRA)(Growth factor-inducible protein 2A9)(MLN 4) [Source:UniProtKB/Swiss-Prot;Acc:P06703]	GO:0007165 signal transduction,GO:0007049 cell cycle,GO:0008283 cell proliferation,GO:0048146 positive regulation of fibroblast proliferation,GO:0007409 axonogenesis	GO:0005509 calcium ion binding,GO:0008270 zinc ion binding,GO:0008083 growth factor activity,GO:0042803 protein homodimerization activity,GO:0048306 calcium-dependent protein binding,GO:0048154 S100 beta binding	GO:0005634 nucleus,GO:0005737 cytoplasm,GO:0001726 ruffle,GO:0005635 nuclear envelope	174.991	704.823	151.632	627.044	151.632	327.174	2.15768	1.10948	*		OK	OK
opHsV0400000381	opHsV0400000381	ENSG00000140575	NM_003870	8826	IQGAP1	Ras GTPase-activating-like protein IQGAP1 (p195) [Source:UniProtKB/Swiss-Prot;Acc:P46940]	GO:0007165 signal transduction,GO:0006355 regulation of transcription, DNA-dependent,GO:0051056 regulation of small GTPase mediated signal transduction,GO:0007264 small GTPase mediated signal transduction	GO:0005515 protein binding,GO:0003700 transcription factor activity,GO:0043565 sequence-specific DNA binding,GO:0046983 protein dimerization activity,GO:0005096 GTPase activator activity,GO:0005516 calmodulin binding,GO:0005099 Ras GTPase activator activity,GO:0005095 GTPase inhibitor activity	GO:0005886 plasma membrane,GO:0005634 nucleus,GO:0005622 intracellular,GO:0005737 cytoplasm,GO:0043005 neuron projection,GO:0005884 actin filament,GO:0031252 leading edge	303.7	1236.74	280.342	1158.97	280.342	604.715	2.15706	1.10907	*		OK	OK
H200005558	H200005558	ENSG00000040531	NM_001031681;NM_001031681	1497	CTNS	Cystinosin [Source:UniProtKB/Swiss-Prot;Acc:O60931]	GO:0006810 transport,GO:0046034 ATP metabolic process,GO:0006520 amino acid metabolic process,GO:0006749 glutathione metabolic process,GO:0007420 brain development,GO:0015811 L-cystine transport,GO:0050890 cognition	GO:0015184 L-cystine transmembrane transporter activity	GO:0016021 integral to membrane,GO:0016020 membrane,GO:0005765 lysosomal membrane,GO:0005770 late endosome	167.157	672.253	143.798	594.474	143.798	310.18	2.15705	1.10906	*		OK	OK
AHsV10000775	AHsV10000775	-	NM_017913.2	55664	CDC37L1	Hsp90 co-chaperone Cdc37-like 1 (Hsp90-associating relative of Cdc37) [Source:UniProtKB/Swiss-Prot;Acc:Q7L3B6]	-	GO:0005515 protein binding	GO:0005737 cytoplasm	172.983	696.111	149.625	618.332	149.625	322.628	2.15625	1.10852	*		OK	OK
H300008916	H300008916	ENSG00000138802	NM_001042734;NM_001042734	10427	SEC24B	Protein transport protein Sec24B (SEC24-related protein B) [Source:UniProtKB/Swiss-Prot;Acc:O95487]	GO:0006810 transport,GO:0006886 intracellular protein transport,GO:0016192 vesicle-mediated transport,GO:0016044 membrane organization,GO:0006888 ER to Golgi vesicle-mediated transport	GO:0005515 protein binding,GO:0008270 zinc ion binding,GO:0005215 transporter activity	GO:0016020 membrane,GO:0005737 cytoplasm,GO:0005794 Golgi apparatus,GO:0000139 Golgi membrane,GO:0005783 endoplasmic reticulum,GO:0005789 endoplasmic reticulum membrane,GO:0030127 COPII vesicle coat	145.682	583.197	122.323	505.418	122.323	263.713	2.15586	1.10827	*		OK	OK
opHsV0400000873	opHsV0400000873	ENSG00000172602	NM_014470	27289	RND1	Rho-related GTP-binding protein Rho6 Precursor (Rho family GTPase 1)(Rnd1) [Source:UniProtKB/Swiss-Prot;Acc:Q92730]	GO:0015031 protein transport,GO:0007264 small GTPase mediated signal transduction,GO:0007162 negative regulation of cell adhesion,GO:0007015 actin filament organization,GO:0016322 neuron remodeling	GO:0005515 protein binding,GO:0000166 nucleotide binding,GO:0005525 GTP binding,GO:0003924 GTPase activity	GO:0005886 plasma membrane,GO:0005856 cytoskeleton,GO:0005622 intracellular,GO:0005737 cytoplasm,GO:0005912 adherens junction	148.672	595.393	125.314	517.614	125.314	270.076	2.15519	1.10782	*		OK	OK
AHsV10000422	AHsV10000422	-	NM_138363.1	90799	CCDC45	Coiled-coil domain-containing protein 45 [Source:UniProtKB/Swiss-Prot;Acc:Q96GE4]	-	GO:0005515 protein binding	-	407.024	1662.36	383.665	1584.58	383.665	826.788	2.15497	1.10767	*		OK	OK
H300019580	H300019580	ENSG00000109572	NM_173872;NM_173872	1182	CLCN3	Chloride channel protein 3 (ClC-3) [Source:UniProtKB/Swiss-Prot;Acc:P51790]	GO:0006821 chloride transport	GO:0005216 ion channel activity,GO:0005247 voltage-gated chloride channel activity	GO:0016020 membrane,GO:0016324 apical plasma membrane	131.042	522.056	107.683	444.277	107.683	231.811	2.15272	1.10616	*		OK	OK
AHsV10003481	AHsV10003481	-	NM_016290.3	51720	UIMC1	BRCA1-A complex subunit RAP80 (Receptor-associated protein 80)(Ubiquitin interaction motif-containing protein 1)(Retinoid X receptor-interacting protein 110) [Source:UniProtKB/Swiss-Prot;Acc:Q96RL1]	-	-	-	231.571	935.778	208.213	857.999	208.213	447.679	2.15011	1.10441	*		OK	OK
H300012836	H300012836	ENSG00000165406	NM_145021	220972	40610	E3 ubiquitin-protein ligase MARCH8 (EC 6.3.2.-)(Membrane-associated RING finger protein 8)(Membrane-associated RING-CH protein VIII)(MARCH-VIII)(RING finger protein 178)(Cellular modulator of immune recognition)(c-MIR) [Source:UniProtKB/Swiss-Prot;Acc:Q5T0T0]	GO:0006511 ubiquitin-dependent protein catabolic process,GO:0006955 immune response	GO:0005515 protein binding,GO:0008270 zinc ion binding,GO:0046872 metal ion binding,GO:0016874 ligase activity	GO:0016021 integral to membrane,GO:0016020 membrane,GO:0031410 cytoplasmic vesicle,GO:0030659 cytoplasmic vesicle membrane	614.962	2514.53	591.603	2436.75	591.603	1271.43	2.14912	1.10375	*		OK	OK
H200016782	H200016782	ENSG00000132824	NM_198941;NM_006811	10955	SERINC3	Serine incorporator 3 (Tumor differentially expressed protein 1) [Source:UniProtKB/Swiss-Prot;Acc:Q13530]	GO:0006917 induction of apoptosis	GO:0005515 protein binding	GO:0005886 plasma membrane,GO:0016021 integral to membrane,GO:0016020 membrane,GO:0005794 Golgi apparatus	687.902	2814.18	664.543	2736.4	664.543	1427.78	2.14851	1.10334	*		OK	OK
H200014024	H200014024	ENSG00000066027	NM_006243	5525	PPP2R5A	Serine/threonine-protein phosphatase 2A 56 kDa regulatory subunit alpha isoform (PP2A, B subunit, B' alpha isoform)(PP2A, B subunit, B56 alpha isoform)(PP2A, B subunit, PR61 alpha isoform)(PP2A, B subunit, R5 alpha isoform) [Source:UniProtKB/Swiss-Prot;Acc:Q15172]	GO:0007165 signal transduction	GO:0005515 protein binding,GO:0005488 binding,GO:0008601 protein phosphatase type 2A regulator activity	GO:0005737 cytoplasm,GO:0000159 protein phosphatase type 2A complex	215.498	867.952	192.139	790.173	192.139	412.29	2.14578	1.1015	*		OK	OK
CHsGV10003269	CHsGV10003269	-	NM_024528.2	79576	NKAP	NF-kappa-B-activating protein [Source:UniProtKB/Swiss-Prot;Acc:Q8N5F7]	-	-	GO:0005737 cytoplasm,GO:0005634 nucleus	278.181	1125.71	254.823	1047.93	254.823	546.78	2.14573	1.10147	*		OK	OK
H300000217	H300000217	ENSG00000156577	-	-	AC009269.6	-	-	-	-	448.074	1823.01	424.716	1745.23	424.716	910.613	2.14405	1.10034	*		OK	OK
AHsV10002035	AHsV10002035	-	NM_003675.3	8559	PRPF18	Pre-mRNA-splicing factor 18 (PRP18 homolog)(hPRP18) [Source:UniProtKB/Swiss-Prot;Acc:Q99633]	GO:0006397 mRNA processing,GO:0008380 RNA splicing	-	GO:0005634 nucleus,GO:0005681 spliceosome,GO:0016607 nuclear speck	149.137	594.56	125.778	516.781	125.778	269.642	2.14378	1.10016	*		OK	OK
H300019535	H300019535	ENSG00000070961	NM_001682;NM_001682	490	ATP2B1	Plasma membrane calcium-transporting ATPase 1 (PMCA1)(EC 3.6.3.8)(Plasma membrane calcium pump isoform 1)(Plasma membrane calcium ATPase isoform 1) [Source:UniProtKB/Swiss-Prot;Acc:P20020]	GO:0008152 metabolic process,GO:0006812 cation transport,GO:0006816 calcium ion transport,GO:0006754 ATP biosynthetic process	GO:0000287 magnesium ion binding,GO:0005509 calcium ion binding,GO:0016787 hydrolase activity,GO:0000166 nucleotide binding,GO:0005524 ATP binding,GO:0003824 catalytic activity,GO:0005516 calmodulin binding,GO:0005388 calcium-transporting ATPase activity,GO:0016820 hydrolase activity, acting on acid anhydrides, catalyzing transmembrane movement of substances,GO:0015662 ATPase activity, coupled to…	GO:0005886 plasma membrane,GO:0016020 membrane,GO:0005887 integral to plasma membrane	386.313	1567.05	362.954	1489.28	362.954	777.062	2.14093	1.09824	*		OK	OK
H300022116	H300022116	ENSG00000139116	NM_017641;NM_017641;NM_017641	-	KIF21A	Kinesin-like protein KIF21A (Kinesin-like protein KIF2)(Renal carcinoma antigen NY-REN-62) [Source:UniProtKB/Swiss-Prot;Acc:Q7Z4S6]	GO:0007018 microtubule-based movement	GO:0003777 microtubule motor activity,GO:0005524 ATP binding	GO:0005875 microtubule associated complex	209.483	841.065	186.125	763.286	186.125	398.261	2.13975	1.09744	*		OK	OK
H300008499	H300008499	ENSG00000125347	NM_002198;NM_002198	3659	IRF1	Interferon regulatory factor 1 (IRF-1) [Source:UniProtKB/Swiss-Prot;Acc:P10914]	GO:0006350 transcription,GO:0006355 regulation of transcription, DNA-dependent,GO:0045944 positive regulation of transcription from RNA polymerase II promoter,GO:0045786 negative regulation of cell cycle,GO:0010468 regulation of gene expression,GO:0045084 positive regulation of interleukin-12 biosynthetic process,GO:0043374 CD8-positive, alpha-beta T cell differentiation	GO:0003700 transcription factor activity,GO:0043565 sequence-specific DNA binding	GO:0005634 nucleus	150.609	599.598	127.25	521.819	127.25	272.27	2.13964	1.09737	*		OK	OK
H200001086	H200001086	ENSG00000135164	NM_021145;NM_021145	9988	DMTF1	Cyclin-D-binding Myb-like transcription factor 1 (hDMTF1)(Cyclin-D-interacting Myb-like protein 1)(hDMP1) [Source:UniProtKB/Swiss-Prot;Acc:Q9Y222]	GO:0006355 regulation of transcription, DNA-dependent,GO:0045786 negative regulation of cell cycle	GO:0003677 DNA binding,GO:0003700 transcription factor activity	GO:0005634 nucleus	217.968	875.373	194.61	797.594	194.61	416.162	2.13844	1.09656	*		OK	OK
H300021506	H300021506	ENSG00000177200	-	80205	CHD9	Chromodomain-helicase-DNA-binding protein 9 (CHD-9)(EC 3.6.1.-)(ATP-dependent helicase CHD9)(Chromatin-related mesenchymal modulator)(CReMM)(Chromatin-remodeling factor CHROM1)(Peroxisomal proliferator-activated receptor A-interacting complex 320 kDa protein)(PPAR-alpha-interacting complex protein 320 kDa)(Kismet homolog 2) [Source:UniProtKB/Swiss-Prot;Acc:Q3L8U1]	GO:0006350 transcription,GO:0006355 regulation of transcription, DNA-dependent,GO:0016568 chromatin modification,GO:0006333 chromatin assembly or disassembly	GO:0003677 DNA binding,GO:0005515 protein binding,GO:0016787 hydrolase activity,GO:0000166 nucleotide binding,GO:0005524 ATP binding,GO:0003676 nucleic acid binding,GO:0004386 helicase activity,GO:0003682 chromatin binding	GO:0005634 nucleus,GO:0005737 cytoplasm,GO:0000785 chromatin	310.456	1254.21	287.098	1176.43	287.098	613.828	2.13804	1.09629	*		OK	OK
H200003922	H200003922	ENSG00000137504	NM_001039618;NM_001039618	58487	CREBZF	CREB/ATF bZIP transcription factor (Host cell factor-binding transcription factor Zhangfei)(HCF-binding transcription factor Zhangfei) [Source:UniProtKB/Swiss-Prot;Acc:Q9NS37]	GO:0006355 regulation of transcription, DNA-dependent,GO:0016481 negative regulation of transcription,GO:0009615 response to virus,GO:0051090 regulation of transcription factor activity,GO:0045814 negative regulation of gene expression, epigenetic	GO:0003700 transcription factor activity,GO:0043565 sequence-specific DNA binding,GO:0046983 protein dimerization activity,GO:0016566 specific transcriptional repressor activity	GO:0005634 nucleus	194.266	777.605	170.907	699.826	170.907	365.149	2.13654	1.09527	*		OK	OK
H200006513	H200006513	ENSG00000144136	NM_005415	-	SLC20A1	Sodium-dependent phosphate transporter 1 (Solute carrier family 20 member 1)(Phosphate transporter 1)(PiT-1)(Gibbon ape leukemia virus receptor 1)(GLVR-1)(Leukemia virus receptor 1 homolog) [Source:UniProtKB/Swiss-Prot;Acc:Q8WUM9]	GO:0006817 phosphate transport	GO:0005315 inorganic phosphate transmembrane transporter activity	GO:0016020 membrane	2363.71	9658.92	2340.35	9581.14	2340.35	4999.17	2.13608	1.09496	*		OK	OK
AHsV10001361	AHsV10001361	-	NM_001128921.1	4140	MARK3	MAP/microtubule affinity-regulating kinase 3 (EC 2.7.11.1)(Cdc25C-associated protein kinase 1)(C-TAK1)(cTAK1)(Serine/threonine-protein kinase p78)(Ser/Thr protein kinase PAR-1)(Protein kinase STK10) [Source:UniProtKB/Swiss-Prot;Acc:P27448]	GO:0006468 protein amino acid phosphorylation	GO:0004672 protein kinase activity,GO:0004674 protein serine/threonine kinase activity,GO:0004713 protein tyrosine kinase activity,GO:0005524 ATP binding	-	350.889	1417.07	327.53	1339.29	327.53	698.805	2.13356	1.09326	*		OK	OK
AHsV10003439	AHsV10003439	-	NM_006462.4	10616	RBCK1	RanBP-type and C3HC4-type zinc finger-containing protein 1 (Ubiquitin-conjugating enzyme 7-interacting protein 3)(Hepatitis B virus X-associated protein 4)(HBV-associated factor 4)(RING finger protein 54) [Source:UniProtKB/Swiss-Prot;Acc:Q9BYM8]	-	GO:0005515 protein binding,GO:0008270 zinc ion binding	GO:0005622 intracellular	343.339	1386.13	319.98	1308.35	319.98	682.659	2.13344	1.09318	*		OK	OK
H200011971	H200011971	ENSG00000155744	NM_173822	285172	FAM126B	Protein FAM126B [Source:UniProtKB/Swiss-Prot;Acc:Q8IXS8]	-	-	GO:0005622 intracellular	154.661	613.169	131.302	535.389	131.302	279.351	2.12754	1.08919	*		OK	OK
H300021421	H300021421	ENSG00000175354	NM_002828;NM_002828;NM_002828;NM_002828	-	PTPN2	Tyrosine-protein phosphatase non-receptor type 2 (EC 3.1.3.48)(T-cell protein-tyrosine phosphatase)(TCPTP) [Source:UniProtKB/Swiss-Prot;Acc:P17706]	GO:0006470 protein amino acid dephosphorylation,GO:0016311 dephosphorylation	GO:0004725 protein tyrosine phosphatase activity,GO:0016791 phosphatase activity	-	379.396	1528.67	356.037	1450.89	356.037	757.034	2.12628	1.08833	*		OK	OK
AHsV10002277	AHsV10002277	-	NM_005050	5826	ABCD4	ATP-binding cassette sub-family D member 4 (Peroxisomal membrane protein 69)(PMP69)(Peroxisomal membrane protein 1-like)(PXMP1-L)(P70R) [Source:UniProtKB/Swiss-Prot;Acc:O14678]	GO:0006810 transport	GO:0000166 nucleotide binding,GO:0005215 transporter activity,GO:0005524 ATP binding,GO:0016887 ATPase activity,GO:0017111 nucleoside-triphosphatase activity,GO:0042626 ATPase activity, coupled to transmembrane movement of substances	GO:0005737 cytoplasm,GO:0005777 peroxisome,GO:0005778 peroxisomal membrane,GO:0005886 plasma membrane,GO:0016020 membrane,GO:0016021 integral to membrane,GO:0043190 ATP-binding cassette (ABC) transporter complex	509.105	2055.39	485.746	1977.61	485.746	1031.86	2.12428	1.08697	*		OK	OK
AHsV10001216	AHsV10001216	-	NM_017641.2	55605	KIF21A	Kinesin-like protein KIF21A (Kinesin-like protein KIF2)(Renal carcinoma antigen NY-REN-62) [Source:UniProtKB/Swiss-Prot;Acc:Q7Z4S6]	GO:0007018 microtubule-based movement	GO:0003777 microtubule motor activity,GO:0005524 ATP binding	GO:0005875 microtubule associated complex	467.917	1886.2	444.559	1808.42	444.559	943.584	2.12252	1.08578	*		OK	OK
AHsV10002198	AHsV10002198	-	NM_153261.4	255919	RP5-1055C14.6	transmembrane protein 188 (TMEM188), mRNA [Source:RefSeq DNA;Acc:NM_153261]	-	-	-	206.48	822.041	183.122	744.262	183.122	388.335	2.12064	1.0845	*		OK	OK
AHsV10002571	AHsV10002571	-	NM_001040001.1	4301	MLLT4	Afadin (Protein AF-6) [Source:UniProtKB/Swiss-Prot;Acc:P55196]	GO:0007165 signal transduction	GO:0005515 protein binding	GO:0005913 cell-cell adherens junction	843.902	3407.15	820.544	3329.37	820.544	1737.17	2.11709	1.08209	*		OK	OK
H200006421	H200006421	ENSG00000124486	NM_001039590	-	USP9X	Probable ubiquitin carboxyl-terminal hydrolase FAF-X (EC 3.1.2.15)(Ubiquitin thioesterase FAF-X)(Ubiquitin-specific-processing protease FAF-X)(Deubiquitinating enzyme FAF-X)(Fat facets protein-related, X-linked)(Ubiquitin-specific protease 9, X chromosome) [Source:UniProtKB/Swiss-Prot;Acc:Q93008]	GO:0006511 ubiquitin-dependent protein catabolic process,GO:0007292 female gamete generation	GO:0005515 protein binding,GO:0008233 peptidase activity,GO:0004221 ubiquitin thiolesterase activity,GO:0004197 cysteine-type endopeptidase activity	-	341.171	1366.82	317.812	1289.04	317.812	672.583	2.11629	1.08154	*		OK	OK
H200016459	H200016459	ENSG00000157224	NM_012129;NM_012129	9069	CLDN12	Claudin-12 [Source:UniProtKB/Swiss-Prot;Acc:P56749]	GO:0016338 calcium-independent cell-cell adhesion	GO:0005198 structural molecule activity,GO:0042802 identical protein binding	GO:0005886 plasma membrane,GO:0016021 integral to membrane,GO:0030054 cell junction,GO:0005923 tight junction	400.217	1604.81	376.859	1527.03	376.859	796.761	2.11422	1.08012	*		OK	OK
H300014598	H300014598	ENSG00000153132	NM_004362	1047	CLGN	Calmegin Precursor [Source:UniProtKB/Swiss-Prot;Acc:O14967]	GO:0006457 protein folding,GO:0007338 single fertilization	GO:0005509 calcium ion binding,GO:0051082 unfolded protein binding	GO:0016021 integral to membrane,GO:0016020 membrane,GO:0005783 endoplasmic reticulum,GO:0005789 endoplasmic reticulum membrane	324.215	1296.52	300.856	1218.74	300.856	635.904	2.11365	1.07974	*		OK	OK
H300000561	H300000561	ENSG00000160200	NM_000071;NM_000071;NM_000071	875	CBS	Cystathionine beta-synthase (EC 4.2.1.22)(Serine sulfhydrase)(Beta-thionase) [Source:UniProtKB/Swiss-Prot;Acc:P35520]	GO:0008152 metabolic process,GO:0008652 amino acid biosynthetic process,GO:0006535 cysteine biosynthetic process from serine,GO:0019343 cysteine biosynthetic process via cystathionine	GO:0046872 metal ion binding,GO:0016829 lyase activity,GO:0030170 pyridoxal phosphate binding,GO:0005506 iron ion binding,GO:0003824 catalytic activity,GO:0004122 cystathionine beta-synthase activity	GO:0005634 nucleus,GO:0005737 cytoplasm,GO:0005829 cytosol,GO:0005730 nucleolus	435.642	1746.32	412.284	1668.54	412.284	870.598	2.11165	1.07837	*		OK	OK
H300021803	H300021803	ENSG00000120709	NM_016605	51307	FAM53C	Protein FAM53C [Source:UniProtKB/Swiss-Prot;Acc:Q9NYF3]	-	-	-	125.767	491.554	102.409	413.775	102.409	215.896	2.10818	1.076	*		OK	OK
H300020462	H300020462	ENSG00000151092	NM_018297;NM_018297;NM_018297	55768	NGLY1	Peptide-N(4)-(N-acetyl-beta-glucosaminyl)asparagine amidase (PNGase)(hPNGase)(EC 3.5.1.52)(Peptide:N-glycanase)(N-glycanase 1) [Source:UniProtKB/Swiss-Prot;Acc:Q96IV0]	GO:0006516 glycoprotein catabolic process	GO:0005515 protein binding,GO:0016787 hydrolase activity,GO:0008270 zinc ion binding,GO:0046872 metal ion binding,GO:0000224 peptide-N4-(N-acetyl-beta-glucosaminyl)asparagine amidase activity	GO:0005737 cytoplasm	228.071	903.64	204.713	825.861	204.713	430.911	2.10495	1.07379	*		OK	OK
H200004965	H200004965	ENSG00000187231	NM_178123	91404	SESTD1	SEC14 domain and spectrin repeat-containing protein 1 (Huntingtin-interacting protein-like protein)(Protein Solo) [Source:UniProtKB/Swiss-Prot;Acc:Q86VW0]	-	GO:0005515 protein binding	-	613.103	2455.13	589.744	2377.35	589.744	1240.43	2.10334	1.07268	*		OK	OK
AHsV10001693	AHsV10001693	-	NM_002018.2	2314	FLII	Protein flightless-1 homolog [Source:UniProtKB/Swiss-Prot;Acc:Q13045]	GO:0006350 transcription,GO:0006355 regulation of transcription, DNA-dependent,GO:0006936 muscle contraction,GO:0007275 multicellular organismal development	GO:0003779 actin binding,GO:0005515 protein binding	GO:0005634 nucleus,GO:0005737 cytoplasm,GO:0005813 centrosome,GO:0005856 cytoskeleton	408.835	1631.69	385.477	1553.91	385.477	810.787	2.10333	1.07268	*		OK	OK
H200012149	H200012149	ENSG00000120708	-	-	TGFBI	Transforming growth factor-beta-induced protein ig-h3 Precursor (Beta ig-h3)(Kerato-epithelin)(RGD-containing collagen-associated protein)(RGD-CAP) [Source:UniProtKB/Swiss-Prot;Acc:Q15582]	-	-	-	3322.86	13347.9	3299.5	13270.1	3299.5	6923.95	2.09848	1.06935	*		OK	OK
H200002622	H200002622	ENSG00000163875	NM_022756;NM_022756;NM_022756	64769	C1orf149	Uncharacterized protein C1orf149 (Sarcoma antigen NY-SAR-91) [Source:UniProtKB/Swiss-Prot;Acc:Q9HAF1]	-	-	-	247.892	980.249	224.533	902.47	224.533	470.883	2.09716	1.06844	*		OK	OK
H300003128	H300003128	ENSG00000089289	NM_001551;NM_001551	3476	IGBP1	Immunoglobulin-binding protein 1 (CD79a-binding protein 1)(B-cell signal transduction molecule alpha 4)(Protein alpha-4)(Renal carcinoma antigen NY-REN-16) [Source:UniProtKB/Swiss-Prot;Acc:P78318]	GO:0009966 regulation of signal transduction,GO:0009607 response to biotic stimulus,GO:0042113 B cell activation	GO:0005515 protein binding,GO:0008601 protein phosphatase type 2A regulator activity	GO:0005856 cytoskeleton,GO:0005737 cytoplasm	584.696	2331.02	561.338	2253.24	561.338	1175.68	2.09442	1.06655	*		OK	OK
H200020154	H200020154	ENSG00000144118	NM_002881	5899	RALB	Ras-related protein Ral-B Precursor [Source:UniProtKB/Swiss-Prot;Acc:P11234]	GO:0007165 signal transduction,GO:0015031 protein transport,GO:0007264 small GTPase mediated signal transduction,GO:0006886 intracellular protein transport,GO:0007265 Ras protein signal transduction,GO:0006913 nucleocytoplasmic transport	GO:0005515 protein binding,GO:0000166 nucleotide binding,GO:0005525 GTP binding,GO:0003924 GTPase activity	GO:0005886 plasma membrane,GO:0005622 intracellular	284.281	1125.02	260.922	1047.24	260.922	546.422	2.0942	1.0664	*		OK	OK
opHsV0400000289	opHsV0400000289	ENSG00000138600	NM_032802	84888	AC012100.1	Signal peptide peptidase-like 2A (Protein SPP-like 2A)(Protein SPPL2a)(EC 3.4.23.-)(Intramembrane protease 3)(IMP3)(Presenilin-like protein 2) [Source:UniProtKB/Swiss-Prot;Acc:Q8TCT8]	GO:0007166 cell surface receptor linked signal transduction	GO:0008233 peptidase activity,GO:0004190 aspartic-type endopeptidase activity,GO:0004926 non-G-protein coupled 7TM receptor activity	GO:0016021 integral to membrane,GO:0016020 membrane	382.161	1514.65	358.802	1436.87	358.802	749.719	2.0895	1.06316	*		OK	OK
H200014768	H200014768	ENSG00000100592	NM_014992;NM_014992;NM_014992;NM_014992	23002	DAAM1	Disheveled-associated activator of morphogenesis 1 [Source:UniProtKB/Swiss-Prot;Acc:Q9Y4D1]	GO:0030036 actin cytoskeleton organization,GO:0016043 cellular component organization	GO:0005488 binding,GO:0003779 actin binding,GO:0005179 hormone activity,GO:0017048 Rho GTPase binding	GO:0005576 extracellular region,GO:0005737 cytoplasm,GO:0015629 actin cytoskeleton	295.245	1165.8	271.886	1088.02	271.886	567.698	2.088	1.06212	*		OK	OK
H200012164	H200012164	ENSG00000074319	NM_006292;NM_006292	-	TSG101	Tumor susceptibility gene 101 protein [Source:UniProtKB/Swiss-Prot;Acc:Q99816]	GO:0015031 protein transport,GO:0006464 protein modification process	-	-	428.086	1697.28	404.728	1619.51	404.728	845.012	2.08785	1.06202	*		OK	OK
H200004979	H200004979	ENSG00000119004	NM_177538	-	CYP20A1	Cytochrome P450 20A1 (EC 1.14.-.-) [Source:UniProtKB/Swiss-Prot;Acc:Q6UW02]	-	GO:0005506 iron ion binding,GO:0020037 heme binding,GO:0009055 electron carrier activity,GO:0004497 monooxygenase activity	-	223.983	880.037	200.625	802.258	200.625	418.595	2.08646	1.06106	*		OK	OK
AHsV10001301	AHsV10001301	-	NM_018170.3	55197	RPRD1A	Regulation of nuclear pre-mRNA domain-containing protein 1A (Cyclin-dependent kinase inhibitor 2B-related protein)(p15INK4B-related protein) [Source:UniProtKB/Swiss-Prot;Acc:Q96P16]	-	-	-	239.123	940.114	215.765	862.335	215.765	449.942	2.08534	1.06028	*		OK	OK
AHsV10000148	AHsV10000148	-	NM_004747.3	9231	DLG5	Disks large homolog 5 (Placenta and prostate DLG)(Discs large protein P-dlg) [Source:UniProtKB/Swiss-Prot;Acc:Q8TDM6]	GO:0042981 regulation of apoptosis	GO:0005515 protein binding	GO:0005622 intracellular	177.763	693.848	154.405	616.069	154.405	321.447	2.08185	1.05787	*		OK	OK
CHsGV10000099	CHsGV10000099	-	NM_006537.2	9960	USP3	Ubiquitin carboxyl-terminal hydrolase 3 (EC 3.1.2.15)(Ubiquitin thioesterase 3)(Ubiquitin-specific-processing protease 3)(Deubiquitinating enzyme 3) [Source:UniProtKB/Swiss-Prot;Acc:Q9Y6I4]	GO:0006511 ubiquitin-dependent protein catabolic process	GO:0008270 zinc ion binding,GO:0004843 ubiquitin-specific protease activity,GO:0004221 ubiquitin thiolesterase activity,GO:0008233 peptidase activity,GO:0046872 metal ion binding,GO:0008234 cysteine-type peptidase activity	-	226.121	886.289	202.762	808.509	202.762	421.857	2.08055	1.05697	*		OK	OK
AHsV10000038	AHsV10000038	-	NM_015434.2	25896	INTS7	Integrator complex subunit 7 (Int7) [Source:UniProtKB/Swiss-Prot;Acc:Q9NVH2]	GO:0016180 snRNA processing	GO:0005488 binding,GO:0005515 protein binding	GO:0005634 nucleus,GO:0032039 integrator complex	176.215	686.234	152.856	608.455	152.856	317.475	2.07695	1.05447	*		OK	OK
H200002300	H200002300	ENSG00000105928	NM_004403	1687	DFNA5	Non-syndromic hearing impairment protein 5 (Inversely correlated with estrogen receptor expression 1)(ICERE-1) [Source:UniProtKB/Swiss-Prot;Acc:O60443]	-	-	-	261.434	1025.05	238.076	947.267	238.076	494.257	2.07605	1.05384	*		OK	OK
opHsV0400000821	opHsV0400000821	ENSG00000171928	NM_016078	201158	FAM18B	Protein FAM18B [Source:UniProtKB/Swiss-Prot;Acc:Q9NYZ1]	-	-	GO:0016021 integral to membrane,GO:0016020 membrane	606.522	2397.35	583.164	2319.57	583.164	1210.29	2.07538	1.05338	*		OK	OK
AHsV10002930	AHsV10002930	-	NM_002865.1	5862	RAB2	Ras-related protein Rab-2A [Source:UniProtKB/Swiss-Prot;Acc:P61019]	GO:0006355 regulation of transcription, DNA-dependent,GO:0006886 intracellular protein transport,GO:0006888 ER to Golgi vesicle-mediated transport,GO:0006913 nucleocytoplasmic transport,GO:0007165 signal transduction,GO:0007264 small GTPase mediated signa	GO:0000166 nucleotide binding,GO:0003924 GTPase activity,GO:0005515 protein binding,GO:0005524 ATP binding,GO:0005525 GTP binding,GO:0008134 transcription factor binding	GO:0000139 Golgi membrane,GO:0005622 intracellular,GO:0005783 endoplasmic reticulum,GO:0005789 endoplasmic reticulum membrane,GO:0005794 Golgi apparatus,GO:0016020 membrane,GO:0033116 ER-Golgi intermediate compartment membrane,GO:0042470 melanosome	309.527	1215.46	286.168	1137.68	286.168	593.612	2.07435	1.05266	*		OK	OK
H200017033	H200017033	ENSG00000106344	NM_018077	55131	RBM28	RNA-binding protein 28 (RNA-binding motif protein 28) [Source:UniProtKB/Swiss-Prot;Acc:Q9NW13]	GO:0006397 mRNA processing,GO:0008380 RNA splicing,GO:0006265 DNA topological change	GO:0003677 DNA binding,GO:0000166 nucleotide binding,GO:0005524 ATP binding,GO:0003676 nucleic acid binding,GO:0003723 RNA binding,GO:0003918 DNA topoisomerase (ATP-hydrolyzing) activity	GO:0005634 nucleus,GO:0005694 chromosome,GO:0005681 spliceosome	184.756	719.288	161.398	641.508	161.398	334.721	2.07389	1.05234	*		OK	OK
AHsV10001135	AHsV10001135	-	NM_006366.2	10486	CAP2	Adenylyl cyclase-associated protein 2 (CAP 2) [Source:UniProtKB/Swiss-Prot;Acc:P40123]	GO:0007010 cytoskeleton organization,GO:0007163 establishment or maintenance of cell polarity,GO:0007165 signal transduction,GO:0007190 activation of adenylate cyclase activity,GO:0055114 oxidation reduction	GO:0003779 actin binding,GO:0005488 binding,GO:0016491 oxidoreductase activity,GO:0046872 metal ion binding	GO:0005886 plasma membrane	163.185	633.458	139.827	555.679	139.827	289.938	2.07355	1.0521	*		OK	OK
AHsV10000981	AHsV10000981	-	NM_002754.3	5603	MAPK13	Mitogen-activated protein kinase 13 (EC 2.7.11.24)(Stress-activated protein kinase 4)(Mitogen-activated protein kinase p38 delta)(MAP kinase p38 delta) [Source:UniProtKB/Swiss-Prot;Acc:O15264]	GO:0006468 protein amino acid phosphorylation,GO:0006950 response to stress,GO:0007049 cell cycle,GO:0007243 protein kinase cascade,GO:0007265 Ras protein signal transduction	GO:0000166 nucleotide binding,GO:0004672 protein kinase activity,GO:0004674 protein serine/threonine kinase activity,GO:0004707 MAP kinase activity,GO:0004713 protein tyrosine kinase activity,GO:0005515 protein binding,GO:0005524 ATP binding,GO:0008339 MP	-	320.341	1257.53	296.983	1179.75	296.983	615.561	2.07272	1.05152	*		OK	OK
H300022221	H300022221	ENSG00000148634	NM_022079;NM_022079	26091	HERC4	Probable E3 ubiquitin-protein ligase HERC4 (EC 6.3.2.-)(HECT domain and RCC1-like domain-containing protein 4) [Source:UniProtKB/Swiss-Prot;Acc:Q5GLZ8]	GO:0006511 ubiquitin-dependent protein catabolic process,GO:0006464 protein modification process	GO:0016874 ligase activity,GO:0016881 acid-amino acid ligase activity	GO:0005622 intracellular,GO:0005737 cytoplasm	181.505	706.004	158.146	628.225	158.146	327.79	2.07271	1.05152	*		OK	OK
AHsV10002504	AHsV10002504	-	NM_021188.1	57862	ZNF410	Zinc finger protein 410 (Zinc finger protein APA-1)(Another partner for ARF 1) [Source:UniProtKB/Swiss-Prot;Acc:Q86VK4]	GO:0006350 transcription,GO:0006355 regulation of transcription, DNA-dependent	GO:0003677 DNA binding,GO:0008270 zinc ion binding,GO:0046872 metal ion binding	GO:0005622 intracellular,GO:0005634 nucleus	152.244	589.768	128.885	511.989	128.885	267.141	2.07271	1.05152	*		OK	OK
AHsV10000007	AHsV10000007	-	NM_030759.3	29982	NRBF2	Nuclear receptor-binding factor 2 (NRBF-2)(Comodulator of PPAR and RXR) [Source:UniProtKB/Swiss-Prot;Acc:Q96F24]	GO:0006350 transcription,GO:0006355 regulation of transcription, DNA-dependent	GO:0003700 transcription factor activity,GO:0043565 sequence-specific DNA binding	GO:0005634 nucleus,GO:0005737 cytoplasm	181.563	706.149	158.204	628.37	158.204	327.866	2.07242	1.05132	*		OK	OK
H300000999	H300000999	ENSG00000104695	NM_004156;NM_004156;NM_004156	5516	PPP2CB	Serine/threonine-protein phosphatase 2A catalytic subunit beta isoform (PP2A-beta)(EC 3.1.3.16) [Source:UniProtKB/Swiss-Prot;Acc:P62714]	GO:0006470 protein amino acid dephosphorylation,GO:0046677 response to antibiotic,GO:0042542 response to hydrogen peroxide,GO:0043066 negative regulation of apoptosis,GO:0043161 proteasomal ubiquitin-dependent protein catabolic process,GO:0010468 regulation of gene expression	GO:0005515 protein binding,GO:0016787 hydrolase activity,GO:0046872 metal ion binding,GO:0030145 manganese ion binding,GO:0005506 iron ion binding,GO:0004722 protein serine/threonine phosphatase activity	GO:0005737 cytoplasm,GO:0000159 protein phosphatase type 2A complex	756.146	2986.23	732.788	2908.45	732.788	1517.55	2.07093	1.05028	*		OK	OK
H300019636	H300019636	ENSG00000066427	NM_004993;NM_004993;NM_004993;NM_004993	-	ATXN3	ataxin 3 isoform 1 [Source:RefSeq peptide;Acc:NP_004984]	-	-	-	209.703	817.106	186.344	739.327	186.344	385.76	2.07015	1.04973	*		OK	OK
H200017509	H200017509	ENSG00000198961	NM_014819;NM_014819	9867	PJA2	E3 ubiquitin-protein ligase Praja2 (Praja-2)(EC 6.3.2.-)(RING finger protein 131) [Source:UniProtKB/Swiss-Prot;Acc:O43164]	GO:0006511 ubiquitin-dependent protein catabolic process,GO:0032259 methylation	GO:0005515 protein binding,GO:0008270 zinc ion binding,GO:0008168 methyltransferase activity,GO:0046872 metal ion binding,GO:0016874 ligase activity,GO:0003676 nucleic acid binding	GO:0005886 plasma membrane,GO:0005737 cytoplasm,GO:0005794 Golgi apparatus,GO:0000139 Golgi membrane,GO:0030054 cell junction,GO:0005783 endoplasmic reticulum,GO:0005789 endoplasmic reticulum membrane,GO:0045202 synapse,GO:0045211 postsynaptic membrane	268.288	1049.47	244.929	971.692	244.929	507.001	2.06999	1.04962	*		OK	OK
H200015556	H200015556	ENSG00000125503	NM_017607	54776	PPP1R12C	Protein phosphatase 1 regulatory subunit 12C (Protein phosphatase 1 myosin-binding subunit of 85 kDa)(Protein phosphatase 1 myosin-binding subunit p85) [Source:UniProtKB/Swiss-Prot;Acc:Q9BZL4]	-	-	GO:0005737 cytoplasm	143.23	553.293	119.871	475.514	119.871	248.11	2.0698	1.04949	*		OK	OK
H200006058	H200006058	ENSG00000106105	NM_002047	2617	GARS	Glycyl-tRNA synthetase (EC 6.1.1.14)(Glycine--tRNA ligase)(GlyRS) [Source:UniProtKB/Swiss-Prot;Acc:P41250]	GO:0006412 translation,GO:0006433 prolyl-tRNA aminoacylation,GO:0045055 regulated secretory pathway,GO:0006418 tRNA aminoacylation for protein translation,GO:0006426 glycyl-tRNA aminoacylation	GO:0005515 protein binding,GO:0000166 nucleotide binding,GO:0005524 ATP binding,GO:0016874 ligase activity,GO:0004827 proline-tRNA ligase activity,GO:0004812 aminoacyl-tRNA ligase activity,GO:0004820 glycine-tRNA ligase activity	GO:0005737 cytoplasm,GO:0005625 soluble fraction,GO:0030141 secretory granule	1944	7678.45	1920.64	7600.67	1920.64	3965.81	2.06484	1.04603	*		OK	OK
H200019173	H200019173	ENSG00000115904	NM_005633	6654	SOS1	Son of sevenless homolog 1 (SOS-1) [Source:UniProtKB/Swiss-Prot;Acc:Q07889]	GO:0007165 signal transduction,GO:0051056 regulation of small GTPase mediated signal transduction,GO:0007264 small GTPase mediated signal transduction,GO:0035023 regulation of Rho protein signal transduction,GO:0007265 Ras protein signal transduction,GO:0006334 nucleosome assembly,GO:0045742 positive regulation of epidermal growth factor receptor signaling pathway,GO:0048011 nerve growth factor r…	GO:0003677 DNA binding,GO:0005515 protein binding,GO:0005085 guanyl-nucleotide exchange factor activity,GO:0017124 SH3 domain binding,GO:0005089 Rho guanyl-nucleotide exchange factor activity,GO:0005100 Rho GTPase activator activity,GO:0005515 protein binding,GO:0017124 SH3 domain binding	GO:0005886 plasma membrane,GO:0005634 nucleus,GO:0005622 intracellular,GO:0005829 cytosol,GO:0000786 nucleosome,GO:0014069 postsynaptic density,GO:0043025 cell soma,GO:0005886 plasma membrane,GO:0014069 postsynaptic density,GO:0043025 cell soma	140.811	541.036	117.452	463.257	117.452	241.714	2.05798	1.04123	*		OK	OK
H200012025	H200012025	ENSG00000103671	NM_016213	9325	TRIP4	Activating signal cointegrator 1 (ASC-1)(Thyroid receptor-interacting protein 4)(TRIP-4) [Source:UniProtKB/Swiss-Prot;Acc:Q15650]	GO:0006366 transcription from RNA polymerase II promoter,GO:0006355 regulation of transcription, DNA-dependent,GO:0045449 regulation of transcription	GO:0008270 zinc ion binding,GO:0046872 metal ion binding,GO:0030528 transcription regulator activity,GO:0003713 transcription coactivator activity,GO:0016922 ligand-dependent nuclear receptor binding	GO:0005634 nucleus,GO:0005737 cytoplasm	180.297	696.757	156.938	618.978	156.938	322.965	2.05791	1.04118	*		OK	OK
CHsGV10001397	CHsGV10001397	-	NM_001042601.2;NM_133462.3	151613	TTC14	Tetratricopeptide repeat protein 14 (TPR repeat protein 14) [Source:UniProtKB/Swiss-Prot;Acc:Q96N46]	-	GO:0003723 RNA binding,GO:0005488 binding	-	352.745	1376.33	329.386	1298.55	329.386	677.546	2.057	1.04054	*		OK	OK
CHsGV10000932	CHsGV10000932	-	NM_002306.2;NR_003225.1	3958	LGALS3	Galectin-3 (Galactose-specific lectin 3)(Mac-2 antigen)(IgE-binding protein)(35 kDa lectin)(Carbohydrate-binding protein 35)(CBP 35)(Laminin-binding protein)(Lectin L-29)(L-31)(Galactoside-binding protein)(GALBP) [Source:UniProtKB/Swiss-Prot;Acc:P17931]	GO:0007186 G-protein coupled receptor protein signaling pathway,GO:0001501 skeletal system development,GO:0030154 cell differentiation,GO:0030198 extracellular matrix organization,GO:0001501 skeletal system development,GO:0030198 extracellular matrix organization	GO:0005515 protein binding,GO:0005529 sugar binding,GO:0019863 IgE binding,GO:0005515 protein binding	GO:0005737 cytoplasm,GO:0005634 nucleus,GO:0016021 integral to membrane,GO:0005886 plasma membrane,GO:0005578 proteinaceous extracellular matrix,GO:0005634 nucleus,GO:0005737 cytoplasm,GO:0005578 proteinaceous extracellular matrix	628.866	2464.6	605.508	2386.83	605.508	1245.38	2.05675	1.04037	*		OK	OK
H200006497	H200006497	ENSG00000163608	NM_015412;NM_015412	25871	C3orf17	Uncharacterized protein C3orf17 [Source:UniProtKB/Swiss-Prot;Acc:Q6NW34]	-	-	-	161.426	621.676	138.068	543.897	138.068	283.79	2.05544	1.03945	*		OK	OK
AHsV10000576	AHsV10000576	-	NM_031453.2	83641	FAM107B	Protein FAM107B [Source:UniProtKB/Swiss-Prot;Acc:Q9H098]	-	-	-	211.403	818.507	188.044	740.728	188.044	386.491	2.05532	1.03936	*		OK	OK
AHsV10002672	AHsV10002672	-	NM_003938.5	8943	AP3D1	AP-3 complex subunit delta-1 (Adapter-related protein complex 3 subunit delta-1)(AP-3 complex subunit delta)(Delta-adaptin) [Source:UniProtKB/Swiss-Prot;Acc:O14617]	GO:0006726 eye pigment biosynthetic process,GO:0006886 intracellular protein transport,GO:0015031 protein transport,GO:0016192 vesicle-mediated transport	GO:0005215 transporter activity,GO:0005488 binding,GO:0005515 protein binding,GO:0008565 protein transporter activity	GO:0000139 Golgi membrane,GO:0005794 Golgi apparatus,GO:0016020 membrane,GO:0030117 membrane coat	1310.21	5146.7	1286.85	5068.92	1286.85	2644.82	2.05526	1.03932	*		OK	OK
H300006103	H300006103	ENSG00000178381	NM_182491;NM_182491	90637	ZFAND2A	AN1-type zinc finger protein 2A [Source:UniProtKB/Swiss-Prot;Acc:Q8N6M9]	-	GO:0008270 zinc ion binding,GO:0046872 metal ion binding	GO:0005634 nucleus,GO:0005737 cytoplasm	826.844	3241.96	803.486	3164.18	803.486	1650.98	2.05477	1.03898	*		OK	OK
H200019025	H200019025	ENSG00000177576	NM_001035005;NM_001035005	497661	C18orf32	Uncharacterized protein C18orf32 (Putative NF-kappa-B-activating protein 200) [Source:UniProtKB/Swiss-Prot;Acc:Q8TCD1]	GO:0043123 positive regulation of I-kappaB kinase/NF-kappaB cascade	GO:0004871 signal transducer activity	-	350.691	1366.69	327.333	1288.91	327.333	672.517	2.05454	1.03881	*		OK	OK
H200009478	H200009478	ENSG00000141452	NM_013326	29919	C18orf8	Uncharacterized protein C18orf8 (Colon cancer-associated protein Mic1)(Mic-1) [Source:UniProtKB/Swiss-Prot;Acc:Q96DM3]	-	-	-	171.646	661.511	148.288	583.731	148.288	304.575	2.05394	1.03839	*		OK	OK
H200008517	H200008517	ENSG00000128272	NM_001675;NM_001675;NM_001675	643159	ATF4	Cyclic AMP-dependent transcription factor ATF-4 (Activating transcription factor 4)(DNA-binding protein TAXREB67)(Cyclic AMP response element-binding protein 2)(CREB2) [Source:UniProtKB/Swiss-Prot;Acc:P18848]	GO:0006950 response to stress,GO:0006350 transcription,GO:0006355 regulation of transcription, DNA-dependent,GO:0007186 G-protein coupled receptor protein signaling pathway,GO:0045944 positive regulation of transcription from RNA polymerase II promoter,GO:0006520 amino acid metabolic process,GO:0006094 gluconeogenesis	GO:0003704 specific RNA polymerase II transcription factor activity,GO:0003700 transcription factor activity,GO:0008022 protein C-terminus binding,GO:0043565 sequence-specific DNA binding,GO:0046983 protein dimerization activity,GO:0016563 transcription activator activity,GO:0050811 GABA receptor binding,GO:0004952 dopamine receptor activity	GO:0005886 plasma membrane,GO:0016021 integral to membrane,GO:0005634 nucleus,GO:0005737 cytoplasm	4367.6	17136	4344.24	17058.2	4344.24	8900.5	2.04881	1.03478	*		OK	OK
opHsV0400005423	opHsV0400005423	ENSG00000180228	NM_003690	8575	PRKRA	Interferon-inducible double stranded RNA-dependent protein kinase activator A (Protein kinase, interferon-inducible double stranded RNA-dependent activator)(Protein activator of the interferon-induced protein kinase)(PKR-associated protein X)(PKR-associating protein X) [Source:UniProtKB/Swiss-Prot;Acc:O75569]	GO:0006950 response to stress,GO:0008285 negative regulation of cell proliferation,GO:0006468 protein amino acid phosphorylation,GO:0006955 immune response,GO:0006917 induction of apoptosis,GO:0042474 middle ear morphogenesis,GO:0009615 response to virus,GO:0042473 outer ear morphogenesis,GO:0048705 skeletal morphogenesis	GO:0005515 protein binding,GO:0008047 enzyme activator activity,GO:0003725 double-stranded RNA binding	GO:0005622 intracellular,GO:0005737 cytoplasm	345.905	1344.13	322.547	1266.35	322.547	660.743	2.04852	1.03458	*		OK	OK
CHsGV10003266	CHsGV10003266	-	NM_032310.3	84270	C9orf89	Bcl10-interacting CARD protein (BinCARD) [Source:UniProtKB/Swiss-Prot;Acc:Q96LW7]	-	GO:0005515 protein binding	-	266.925	1033.49	243.567	955.713	243.567	498.664	2.04734	1.03375	*		OK	OK
AHsV10000285	AHsV10000285	-	NM_016617.2	51569	UFM1	Ubiquitin-fold modifier 1 Precursor [Source:UniProtKB/Swiss-Prot;Acc:P61960]	GO:0019941 modification-dependent protein catabolic process	GO:0005515 protein binding	GO:0005634 nucleus,GO:0005737 cytoplasm	735.42	2871.2	712.061	2793.42	712.061	1457.53	2.04691	1.03345	*		OK	OK
H300020204	H300020204	ENSG00000142687	NM_024874;NM_024874;NM_182686;NM_182686	-	KIAA0319L	Uncharacterized protein KIAA0319-like [Source:UniProtKB/Swiss-Prot;Acc:Q8IZA0]	-	-	-	298.501	1157.03	275.143	1079.25	275.143	563.124	2.04666	1.03327	*		OK	OK
H300011527	H300011527	ENSG00000146872	-	11011	TLK2	Serine/threonine-protein kinase tousled-like 2 (EC 2.7.11.1)(Tousled-like kinase 2)(PKU-alpha) [Source:UniProtKB/Swiss-Prot;Acc:Q86UE8]	GO:0006468 protein amino acid phosphorylation	GO:0005524 ATP binding,GO:0004674 protein serine/threonine kinase activity,GO:0004713 protein tyrosine kinase activity,GO:0004672 protein kinase activity	-	140.598	537.114	117.24	459.335	117.24	239.668	2.04425	1.03157	*		OK	OK
H300018616	H300018616	ENSG00000099622	NM_001280	1153	CIRBP	Cold-inducible RNA-binding protein (Glycine-rich RNA-binding protein CIRP)(A18 hnRNP) [Source:UniProtKB/Swiss-Prot;Acc:Q14011]	GO:0009409 response to cold,GO:0009409 response to cold	GO:0005515 protein binding,GO:0000166 nucleotide binding,GO:0003676 nucleic acid binding,GO:0003723 RNA binding	GO:0005634 nucleus	1093.32	4266.66	1069.97	4188.88	1069.97	2185.64	2.04272	1.03049	*		OK	OK
H200009211	H200009211	ENSG00000109929	NM_001024956;NM_006918	6309	SC5DL	Lathosterol oxidase (EC 1.14.21.6)(Lathosterol 5-desaturase)(Delta(7)-sterol 5-desaturase)(C-5 sterol desaturase)(Sterol-C5-desaturase) [Source:UniProtKB/Swiss-Prot;Acc:O75845]	GO:0055114 oxidation reduction,GO:0006633 fatty acid biosynthetic process,GO:0016126 sterol biosynthetic process	GO:0005506 iron ion binding,GO:0016491 oxidoreductase activity,GO:0000248 C-5 sterol desaturase activity,GO:0050046 lathosterol oxidase activity	GO:0016021 integral to membrane,GO:0016020 membrane,GO:0005783 endoplasmic reticulum,GO:0005789 endoplasmic reticulum membrane	458.65	1779.88	435.292	1702.1	435.292	888.107	2.04026	1.02875	*		OK	OK
H300019594	H300019594	ENSG00000111450	NM_194356;NM_194356;NM_194356	2054	STX2	Syntaxin-2 (Epimorphin) [Source:UniProtKB/Swiss-Prot;Acc:P32856]	GO:0007165 signal transduction,GO:0007340 acrosome reaction,GO:0009887 organ morphogenesis,GO:0006886 intracellular protein transport,GO:0016192 vesicle-mediated transport,GO:0000910 cytokinesis,GO:0007398 ectoderm development,GO:0048547 gut morphogenesis,GO:0030855 epithelial cell differentiation,GO:0030033 microvillus biogenesis,GO:0045026 plasma membrane fusion,GO:0000920 cell separation durin…	GO:0005515 protein binding,GO:0005484 SNAP receptor activity,GO:0048306 calcium-dependent protein binding,GO:0000149 SNARE binding	GO:0005886 plasma membrane,GO:0016021 integral to membrane,GO:0016020 membrane,GO:0005624 membrane fraction,GO:0005792 microsome,GO:0005768 endosome,GO:0016324 apical plasma membrane,GO:0030496 midbody,GO:0005625 soluble fraction,GO:0016323 basolateral plasma membrane	128.856	490.052	105.497	412.273	105.497	215.112	2.03903	1.02788	*		OK	OK
H300022000	H300022000	ENSG00000101004	NM_025176	22981	KIAA0980	Ninein-like protein [Source:UniProtKB/Swiss-Prot;Acc:Q9Y2I6]	-	GO:0005509 calcium ion binding	GO:0005634 nucleus,GO:0005874 microtubule,GO:0005737 cytoplasm,GO:0005813 centrosome	698.427	2714.78	675.069	2637	675.069	1375.91	2.03818	1.02728	*		OK	OK
H200007037	H200007037	ENSG00000082641	NM_003204;NM_003204;NM_003204	-	NFE2L1	Nuclear factor erythroid 2-related factor 1 (NF-E2-related factor 1)(NFE2-related factor 1)(Nuclear factor, erythroid derived 2, like 1)(Transcription factor 11)(Transcription factor HBZ17)(Transcription factor LCR-F1)(Locus control region-factor 1) [Source:UniProtKB/Swiss-Prot;Acc:Q14494]	GO:0006355 regulation of transcription, DNA-dependent,GO:0045449 regulation of transcription	GO:0003677 DNA binding,GO:0003700 transcription factor activity,GO:0043565 sequence-specific DNA binding,GO:0046983 protein dimerization activity	GO:0005634 nucleus	372.271	1440.62	348.913	1362.84	348.913	711.092	2.03803	1.02717	*		OK	OK
H200008122	H200008122	ENSG00000170340	NM_006577	10678	B3GNT1	UDP-GlcNAc:betaGal beta-1,3-N-acetylglucosaminyltransferase 2 (EC 2.4.1.-)(Beta3Gn-T1)(BGnT-1)(Beta-1,3-galactosyltransferase 7)(Beta-1,3-GalTase 7)(Beta3Gal-T7)(b3Gal-T7)(Beta-3-Gx-T7)(UDP-galactose:beta-N-acetylglucosamine beta-1,3-galactosyltransferase 7)(UDP-Gal:beta-GlcNAc beta-1,3-galactosyltransferase 7) [Source:UniProtKB/Swiss-Prot;Acc:Q9NY97]	GO:0008150 biological_process,GO:0006486 protein amino acid glycosylation	GO:0016757 transferase activity, transferring glycosyl groups,GO:0030145 manganese ion binding,GO:0008378 galactosyltransferase activity,GO:0008499 UDP-galactose:beta-N-acetylglucosamine beta-1,3-galactosyltransferase activity	GO:0016021 integral to membrane,GO:0016020 membrane,GO:0005794 Golgi apparatus,GO:0000139 Golgi membrane	370.317	1432.98	346.959	1355.2	346.959	707.103	2.038	1.02716	*		OK	OK
H300005603	H300005603	ENSG00000174681	-	-	AL590080.25	-	-	-	-	590.39	2291.23	567.031	2213.45	567.031	1154.92	2.03678	1.02629	*		OK	OK
AHsV10003359	AHsV10003359	-	NM_139312.1	10730	YME1L1	ATP-dependent metalloprotease YME1L1 (EC 3.4.24.-)(YME1-like protein 1)(ATP-dependent metalloprotease FtsH1)(Meg-4)(Presenilin-associated metalloprotease)(PAMP) [Source:UniProtKB/Swiss-Prot;Acc:Q96TA2]	GO:0006508 proteolysis,GO:0030163 protein catabolic process	GO:0000166 nucleotide binding,GO:0004222 metalloendopeptidase activity,GO:0005524 ATP binding,GO:0008233 peptidase activity,GO:0008270 zinc ion binding,GO:0017111 nucleoside-triphosphatase activity,GO:0046872 metal ion binding	GO:0005739 mitochondrion,GO:0016020 membrane	706.897	2745.67	683.539	2667.89	683.539	1392.03	2.03651	1.0261	*		OK	OK
H200015776	H200015776	ENSG00000066455	NM_005113;NM_005113	-	GOLGA5	Golgin subfamily A member 5 (Golgin-84)(RET-fused gene 5 protein)(Ret-II protein) [Source:UniProtKB/Swiss-Prot;Acc:Q8TBA6]	-	-	-	259.995	1001.37	236.637	923.588	236.637	481.902	2.03646	1.02607	*		OK	OK
AHsV10002692	AHsV10002692	-	NM_014282.2	22927	HABP4	Intracellular hyaluronan-binding protein 4 (IHABP4)(Ki-1/57 intracellular antigen) [Source:UniProtKB/Swiss-Prot;Acc:Q5JVS0]	GO:0006350 transcription,GO:0006355 regulation of transcription, DNA-dependent	-	GO:0005634 nucleus,GO:0005737 cytoplasm	149.381	569.531	126.022	491.752	126.022	256.582	2.03601	1.02574	*		OK	OK
H200002633	H200002633	ENSG00000068097	NM_022070;NM_022070	63897	HEATR6	HEAT repeat-containing protein 6 (Amplified in breast cancer protein 1) [Source:UniProtKB/Swiss-Prot;Acc:Q6AI08]	-	GO:0005488 binding	-	127.462	483.733	104.104	405.954	104.104	211.815	2.03466	1.02478	*		OK	OK
CHsGV10001218	CHsGV10001218	-	NM_001143998.1;NM_001144001.1;NM_001143999.1;NM_001039573.2;NR_026952.1;NM_003003.3	6397	SEC14L1	SEC14-like protein 1 [Source:UniProtKB/Swiss-Prot;Acc:Q92503]	GO:0006810 transport	GO:0005215 transporter activity,GO:0005488 binding	GO:0005622 intracellular,GO:0016020 membrane,GO:0005794 Golgi apparatus	240.974	925.806	217.615	848.027	217.615	442.476	2.0333	1.02382	*		OK	OK
H200002840	H200002840	ENSG00000047249	NM_213619;NM_213619	51606	ATP6V1H	V-type proton ATPase subunit H (V-ATPase subunit H)(Vacuolar proton pump subunit H)(V-ATPase 50/57 kDa subunits)(Vacuolar proton pump subunit SFD)(VMA13)(Nef-binding protein 1)(NBP1) [Source:UniProtKB/Swiss-Prot;Acc:Q9UI12]	GO:0006811 ion transport,GO:0044419 interspecies interaction between organisms,GO:0006897 endocytosis,GO:0015992 proton transport,GO:0015986 ATP synthesis coupled proton transport,GO:0015991 ATP hydrolysis coupled proton transport,GO:0050690 regulation of defense response to virus by virus,GO:0007035 vacuolar acidification	GO:0005515 protein binding,GO:0005488 binding,GO:0016887 ATPase activity,GO:0016820 hydrolase activity, acting on acid anhydrides, catalyzing transmembrane movement of substances,GO:0046961 hydrogen ion transporting ATPase activity, rotational mechanism,GO:0030234 enzyme regulator activity	GO:0005886 plasma membrane,GO:0005829 cytosol,GO:0000221 vacuolar proton-transporting V-type ATPase, V1 domain	175.205	667.809	151.846	590.03	151.846	307.861	2.02745	1.01967	*		OK	OK
H200011090	H200011090	ENSG00000138138	NM_032810;NM_032810	84896	AFDC1	ATPase family AAA domain-containing protein 1 [Source:UniProtKB/Swiss-Prot;Acc:Q8NBU5]	GO:0006139 nucleobase, nucleoside, nucleotide and nucleic acid metabolic process	GO:0000166 nucleotide binding,GO:0005524 ATP binding,GO:0017111 nucleoside-triphosphatase activity,GO:0019205 nucleobase, nucleoside, nucleotide kinase activity	-	339.585	1305.46	316.227	1227.68	316.227	640.571	2.02567	1.0184	*		OK	OK
H300019960	H300019960	ENSG00000091527	NM_017548	55573	CDV3	Protein CDV3 homolog [Source:UniProtKB/Swiss-Prot;Acc:Q9UKY7]	GO:0007186 G-protein coupled receptor protein signaling pathway,GO:0008283 cell proliferation	GO:0003674 molecular_function,GO:0001619 lysosphingolipid and lysophosphatidic acid receptor activity,GO:0004974 leukotriene receptor activity	GO:0016021 integral to membrane,GO:0005737 cytoplasm,GO:0005575 cellular_component	291.855	1120.14	268.496	1042.36	268.496	543.874	2.02563	1.01837	*		OK	OK
H200004928	H200004928	ENSG00000100883	NM_003136	650638	SRP54	Signal recognition particle 54 kDa protein (SRP54) [Source:UniProtKB/Swiss-Prot;Acc:P61011]	GO:0006614 SRP-dependent cotranslational protein targeting to membrane	GO:0005515 protein binding,GO:0000166 nucleotide binding,GO:0005524 ATP binding,GO:0005525 GTP binding,GO:0017111 nucleoside-triphosphatase activity,GO:0043021 ribonucleoprotein binding,GO:0008312 7S RNA binding	GO:0005634 nucleus,GO:0005737 cytoplasm,GO:0016607 nuclear speck,GO:0005730 nucleolus,GO:0005786 signal recognition particle, endoplasmic reticulum targeting,GO:0048500 signal recognition particle	606.986	2339.48	583.628	2261.7	583.628	1180.09	2.02199	1.01578	*		OK	OK
H300018576	H300018576	ENSG00000089048	NM_016649	51575	C20orf6	ESF1 homolog (ABT1-associated protein) [Source:UniProtKB/Swiss-Prot;Acc:Q9H501]	GO:0006350 transcription,GO:0006355 regulation of transcription, DNA-dependent	-	GO:0005634 nucleus	489.115	1882.67	465.756	1804.89	465.756	941.74	2.02196	1.01575	*		OK	OK
CHsGV10001698	CHsGV10001698	-	NM_021731.2;NM_001042680.1;NM_174983.3	126321	C19orf28	Uncharacterized MFS-type transporter C19orf28 [Source:UniProtKB/Swiss-Prot;Acc:Q6NUT3]	-	-	-	230.179	879.067	206.82	801.287	206.82	418.089	2.02151	1.01543	*		OK	OK
AHsV10001672	AHsV10001672	-	NM_001130965.1	23353	UNC84A	Protein unc-84 homolog A (Sad1/unc-84 protein-like 1) [Source:UniProtKB/Swiss-Prot;Acc:O94901]	-	-	-	225.959	862.6	202.601	784.821	202.601	409.497	2.0212	1.01521	*		OK	OK
H200009225	H200009225	ENSG00000187742	NM_024077	-	SECISBP2	SECIS-binding protein 2 (Selenocysteine insertion sequence-binding protein 2) [Source:UniProtKB/Swiss-Prot;Acc:Q96T21]	-	-	-	171.568	651.811	148.21	574.032	148.21	299.514	2.02088	1.01498	*		OK	OK
CHsGV10001815	CHsGV10001815	-	NM_001430.3	2034	EPAS1	Endothelial PAS domain-containing protein 1 (EPAS-1)(Member of PAS protein 2)(Basic-helix-loop-helix-PAS protein MOP2)(Hypoxia-inducible factor 2 alpha)(HIF-2 alpha)(HIF2 alpha)(HIF-1 alpha-like factor)(HLF) [Source:UniProtKB/Swiss-Prot;Acc:Q99814]	GO:0006979 response to oxidative stress,GO:0001525 angiogenesis,GO:0030324 lung development,GO:0007275 multicellular organismal development,GO:0045944 positive regulation of transcription from RNA polymerase II promoter,GO:0001666 response to hypoxia,GO:0007005 mitochondrion organization,GO:0002027 regulation of heart rate,GO:0030097 hemopoiesis,GO:0007601 visual perception,GO:0001892 embryonic p…	GO:0046982 protein heterodimerization activity,GO:0043565 sequence-specific DNA binding,GO:0003700 transcription factor activity,GO:0008134 transcription factor binding,GO:0003713 transcription coactivator activity,GO:0030528 transcription regulator activity,GO:0004871 signal transducer activity,GO:0035035 histone acetyltransferase binding,GO:0003700 transcription factor activity,GO:0003677 DNA b…	GO:0005737 cytoplasm,GO:0005634 nucleus,GO:0005667 transcription factor complex,GO:0005634 nucleus,GO:0005737 cytoplasm,GO:0005667 transcription factor complex	143.41	542.598	120.051	464.819	120.051	242.529	2.02021	1.01451	*		OK	OK
H300001316	H300001316	ENSG00000218215	-	-	RP11-543B16.1	-	-	-	-	879.582	3389.61	856.224	3311.83	856.224	1728.02	2.01819	1.01306	*		OK	OK
H300019638	H300019638	ENSG00000108846	NM_003786	8714	ABCC3	Canalicular multispecific organic anion transporter 2 (ATP-binding cassette sub-family C member 3)(Multidrug resistance-associated protein 3)(Multi-specific organic anion transporter D)(MOAT-D) [Source:UniProtKB/Swiss-Prot;Acc:O15438]	GO:0006810 transport,GO:0015722 canalicular bile acid transport,GO:0015722 canalicular bile acid transport	GO:0000166 nucleotide binding,GO:0005524 ATP binding,GO:0005215 transporter activity,GO:0017111 nucleoside-triphosphatase activity,GO:0016887 ATPase activity,GO:0008514 organic anion transmembrane transporter activity,GO:0042626 ATPase activity, coupled to transmembrane movement of substances,GO:0042626 ATPase activity, coupled to transmembrane movement of substances	GO:0016021 integral to membrane,GO:0016020 membrane,GO:0005624 membrane fraction,GO:0005887 integral to plasma membrane	191.923	729.643	168.564	651.864	168.564	340.124	2.01777	1.01276	*		OK	OK
H300005593	H300005593	ENSG00000220588	-	-	AC016489.1	-	-	-	-	945.01	3640.25	921.652	3562.47	921.652	1858.8	2.01681	1.01207	*		OK	OK
AHsV10003200	AHsV10003200	-	NM_002078.3	2803	GOLGA4	Golgin subfamily A member 4 (Trans-Golgi p230)(256 kDa golgin)(Golgin-245)(Protein 72.1) [Source:UniProtKB/Swiss-Prot;Acc:Q13439]	GO:0016192 vesicle-mediated transport	GO:0000166 nucleotide binding,GO:0031177 phosphopantetheine binding	GO:0000139 Golgi membrane,GO:0005737 cytoplasm,GO:0005794 Golgi apparatus,GO:0005802 trans-Golgi network,GO:0016020 membrane	626.127	2407.43	602.769	2329.65	602.769	1215.54	2.0166	1.01193	*		OK	OK
H300016484	H300016484	ENSG00000118217	NM_007348	22926	ATF6	Cyclic AMP-dependent transcription factor ATF-6 alpha (Activating transcription factor 6 alpha)(ATF6-alpha) [Contains Processed cyclic AMP-dependent transcription factor ATF-6 alpha] [Source:UniProtKB/Swiss-Prot;Acc:P18850]	GO:0007165 signal transduction,GO:0006350 transcription,GO:0006355 regulation of transcription, DNA-dependent,GO:0006357 regulation of transcription from RNA polymerase II promoter,GO:0006457 protein folding,GO:0006986 response to unfolded protein,GO:0006990 positive regulation of gene-specific transcription involved in unfolded protein response	GO:0003700 transcription factor activity,GO:0043565 sequence-specific DNA binding,GO:0046983 protein dimerization activity,GO:0003702 RNA polymerase II transcription factor activity,GO:0003713 transcription coactivator activity	GO:0016021 integral to membrane,GO:0016020 membrane,GO:0005634 nucleus,GO:0005783 endoplasmic reticulum,GO:0005789 endoplasmic reticulum membrane,GO:0005654 nucleoplasm,GO:0005635 nuclear envelope	226.551	862.867	203.193	785.088	203.193	409.637	2.016	1.0115	*		OK	OK
H200002216	H200002216	ENSG00000100262	NM_014570	26286	ARFGAP3	ADP-ribosylation factor GTPase-activating protein 3 (ARF GAP 3) [Source:UniProtKB/Swiss-Prot;Acc:Q9NP61]	GO:0006355 regulation of transcription, DNA-dependent,GO:0006886 intracellular protein transport,GO:0016192 vesicle-mediated transport,GO:0009306 protein secretion,GO:0032312 regulation of ARF GTPase activity	GO:0008270 zinc ion binding,GO:0046872 metal ion binding,GO:0003700 transcription factor activity,GO:0043565 sequence-specific DNA binding,GO:0008565 protein transporter activity,GO:0008060 ARF GTPase activator activity	GO:0016020 membrane,GO:0005634 nucleus,GO:0005737 cytoplasm,GO:0005794 Golgi apparatus,GO:0000139 Golgi membrane,GO:0005829 cytosol	381.441	1458.71	358.082	1380.93	358.082	720.532	2.0122	1.00877	*		OK	OK
AHsV10003475	AHsV10003475	-	NM_000282.2	5095	PCCA	Propionyl-CoA carboxylase alpha chain, mitochondrial Precursor (PCCase subunit alpha)(EC 6.4.1.3)(Propanoyl-CoA:carbon dioxide ligase subunit alpha) [Source:UniProtKB/Swiss-Prot;Acc:P05165]	GO:0006633 fatty acid biosynthetic process,GO:0006807 nitrogen compound metabolic process,GO:0008152 metabolic process	GO:0000166 nucleotide binding,GO:0003824 catalytic activity,GO:0003989 acetyl-CoA carboxylase activity,GO:0004658 propionyl-CoA carboxylase activity,GO:0005524 ATP binding,GO:0009374 biotin binding,GO:0016874 ligase activity,GO:0004086 carbamoyl-phosphate	GO:0005739 mitochondrion,GO:0005759 mitochondrial matrix,GO:0009317 acetyl-CoA carboxylase complex	215.275	817.484	191.917	739.705	191.917	385.957	2.01106	1.00796	*		OK	OK
AHsV10001250	AHsV10001250	-	NM_001378.1	1781	DYNC1I2	Cytoplasmic dynein 1 intermediate chain 2 (Cytoplasmic dynein intermediate chain 2)(Dynein intermediate chain 2, cytosolic)(DH IC-2) [Source:UniProtKB/Swiss-Prot;Acc:Q13409]	GO:0007018 microtubule-based movement	GO:0003777 microtubule motor activity,GO:0005515 protein binding	GO:0005737 cytoplasm,GO:0005874 microtubule,GO:0030286 dynein complex,GO:0005868 cytoplasmic dynein complex,GO:0005869 dynactin complex	322.361	1229.1	299.002	1151.33	299.002	600.729	2.00911	1.00656	*		OK	OK
H200004406	H200004406	ENSG00000033030	-	55596	ZCCHC8	Zinc finger CCHC domain-containing protein 8 [Source:UniProtKB/Swiss-Prot;Acc:Q6NZY4]	GO:0006397 mRNA processing,GO:0008380 RNA splicing	GO:0005515 protein binding,GO:0008270 zinc ion binding,GO:0046872 metal ion binding,GO:0003676 nucleic acid binding	GO:0005681 spliceosome	213.328	808.364	189.969	730.585	189.969	381.198	2.00663	1.00478	*		OK	OK
opHsV0400001524	opHsV0400001524	ENSG00000182457	-	-	AC004542.1	cDNA FLJ20618 fis, clone KAT05049cDNA FLJ31918 fis, clone NT2RP7004946HCG41307, isoform CRA_a ;; [Source:UniProtKB/TrEMBL;Acc:Q9NWT5]	-	-	-	1072.41	4108.07	1049.05	4030.29	1049.05	2102.89	2.00457	1.00329	*		OK	OK
AHsV10003212	AHsV10003212	-	NM_018368.2	55788	LMBRD1	Probable lysosomal cobalamin transporter (LMBR1 domain-containing protein 1)(Nuclear export signal-interacting protein)(HDAg-L-interacting protein NESI) [Source:UniProtKB/Swiss-Prot;Acc:Q9NUN5]	GO:0006810 transport,GO:0044419 interspecies interaction between organisms	GO:0031419 cobalamin binding,GO:0050897 cobalt ion binding	GO:0005765 lysosomal membrane,GO:0016020 membrane,GO:0016021 integral to membrane	289.58	1100.52	266.221	1022.74	266.221	533.638	2.00449	1.00324	*		OK	OK
H300019888	H300019888	ENSG00000082258	NM_001241;NM_001241	905	CCNT2	Cyclin-T2 (CycT2) [Source:UniProtKB/Swiss-Prot;Acc:O60583]	GO:0006366 transcription from RNA polymerase II promoter,GO:0006350 transcription,GO:0006355 regulation of transcription, DNA-dependent,GO:0007049 cell cycle,GO:0051301 cell division,GO:0044419 interspecies interaction between organisms,GO:0000079 regulation of cyclin-dependent protein kinase activity	GO:0005515 protein binding	GO:0005634 nucleus,GO:0005737 cytoplasm,GO:0005654 nucleoplasm	163.447	615.479	140.089	537.7	140.089	280.556	2.0027	1.00195	*		OK	OK
H200001253	H200001253	ENSG00000137936	NM_003567	8412	BCAR3	Breast cancer anti-estrogen resistance protein 3 (SH2 domain-containing protein 3B)(Novel SH2-containing protein 2) [Source:UniProtKB/Swiss-Prot;Acc:O75815]	GO:0007165 signal transduction,GO:0007264 small GTPase mediated signal transduction,GO:0042493 response to drug	GO:0005515 protein binding,GO:0005085 guanyl-nucleotide exchange factor activity	GO:0005622 intracellular	136.48	511.753	113.121	433.974	113.121	226.435	2.00171	1.00123	*		OK	OK
AHsV10002548	AHsV10002548	-	NM_015133.3	23162	ATXN2L	Ataxin-2-like protein (Ataxin-2 domain protein)(Ataxin-2-related protein) [Source:UniProtKB/Swiss-Prot;Acc:Q8WWM7]	-	-	-	342.525	1302.05	319.167	1224.27	319.167	638.789	2.00143	1.00103	*		OK	OK
opHsV0400004637	opHsV0400004637	ENSG00000182534	NM_001008529	439921	MXRA7	Matrix-remodeling-associated protein 7 (Transmembrane anchor protein 1) [Source:UniProtKB/Swiss-Prot;Acc:P84157]	-	-	GO:0016021 integral to membrane,GO:0016020 membrane	147.139	552.524	123.78	474.745	123.78	247.709	2.00119	1.00086	*		OK	OK
H200004282	H200004282	ENSG00000196072	NM_173809;NM_001001342;NM_001001342;NM_001001342	-	BLOC1S2	Biogenesis of lysosome-related organelles complex 1 subunit 2 (BLOC subunit 2)(Centrosome-associated protein) [Source:UniProtKB/Swiss-Prot;Acc:Q6QNY1]	-	-	-	736.991	2812.46	713.632	2734.68	713.632	1426.88	1.99946	0.99961			OK	OK
H200007679	H200007679	ENSG00000101577	NM_014646	9663	LPIN2	Lipin-2 [Source:UniProtKB/Swiss-Prot;Acc:Q92539]	-	GO:0008195 phosphatidate phosphatase activity	GO:0005634 nucleus	226.126	854.623	202.767	776.844	202.767	405.335	1.99902	0.99929			OK	OK
CHsGV10003233	CHsGV10003233	-	NM_004415.2;NM_001008844.1	1832	DSP	Desmoplakin (DP)(250/210 kDa paraneoplastic pemphigus antigen) [Source:UniProtKB/Swiss-Prot;Acc:P15924]	GO:0018149 peptide cross-linking,GO:0030216 keratinocyte differentiation,GO:0008544 epidermis development,GO:0042060 wound healing	GO:0005200 structural constituent of cytoskeleton	GO:0005737 cytoplasm,GO:0005739 mitochondrion,GO:0016323 basolateral plasma membrane,GO:0030054 cell junction,GO:0001533 cornified envelope,GO:0030057 desmosome,GO:0005916 fascia adherens	187.609	706.941	164.25	629.162	164.25	328.279	1.99865	0.999026			OK	OK
H200013444	H200013444	ENSG00000109065	NM_015654	26151	NAT9	N-acetyltransferase 9 (EC 2.3.1.-)(Embryo brain-specific protein) [Source:UniProtKB/Swiss-Prot;Acc:Q9BTE0]	GO:0008152 metabolic process	GO:0008415 acyltransferase activity,GO:0016740 transferase activity,GO:0008080 N-acetyltransferase activity	GO:0043234 protein complex	338.149	1281.52	314.791	1203.74	314.791	628.079	1.99523	0.996553			OK	OK
H300017497	H300017497	ENSG00000142657	NM_002631;NM_002631	5226	PGD	6-phosphogluconate dehydrogenase, decarboxylating (EC 1.1.1.44) [Source:UniProtKB/Swiss-Prot;Acc:P52209]	GO:0008152 metabolic process,GO:0055114 oxidation reduction,GO:0019322 pentose biosynthetic process,GO:0006098 pentose-phosphate shunt,GO:0009051 pentose-phosphate shunt, oxidative branch	GO:0005515 protein binding,GO:0005488 binding,GO:0003824 catalytic activity,GO:0016491 oxidoreductase activity,GO:0050661 NADP binding,GO:0004616 phosphogluconate dehydrogenase (decarboxylating) activity	-	4405.97	16816.5	4382.61	16738.7	4382.61	8733.77	1.99282	0.994814			OK	OK
H200006892	H200006892	ENSG00000091136	NM_002291;NM_002291	3912	LAMB1	Laminin subunit beta-1 Precursor (Laminin B1 chain) [Source:UniProtKB/Swiss-Prot;Acc:P07942]	GO:0007165 signal transduction,GO:0007155 cell adhesion,GO:0050679 positive regulation of epithelial cell proliferation,GO:0006935 chemotaxis,GO:0042476 odontogenesis,GO:0031175 neurite development,GO:0030335 positive regulation of cell migration	GO:0005509 calcium ion binding,GO:0005515 protein binding,GO:0004871 signal transducer activity,GO:0005201 extracellular matrix structural constituent	GO:0016020 membrane,GO:0005856 cytoskeleton,GO:0005576 extracellular region,GO:0005737 cytoplasm,GO:0005578 proteinaceous extracellular matrix,GO:0048471 perinuclear region of cytoplasm,GO:0005604 basement membrane,GO:0005606 laminin-1 complex,GO:0043259 laminin-10 complex,GO:0005607 laminin-2 complex,GO:0043257 laminin-8 complex	663.777	2520.29	640.418	2442.51	640.418	1274.43	1.99	0.992768			OK	OK
H200002579	H200002579	ENSG00000125875	NM_144628	-	TBC1D20	TBC1 domain family member 20 [Source:UniProtKB/Swiss-Prot;Acc:Q96BZ9]	GO:0032313 regulation of Rab GTPase activity	GO:0005097 Rab GTPase activator activity	GO:0005622 intracellular	195.987	735.213	172.629	657.434	172.629	343.03	1.9871	0.990665			OK	OK
opHsV0400000055	opHsV0400000055	ENSG00000102471	NM_019080	54602	NDFIP2	NEDD4 family-interacting protein 2 (NEDD4 WW domain-binding protein 5A)(Putative MAPK-activating protein PM04/PM05/PM06/PM07)(Putative NF-kappa-B-activating protein 413) [Source:UniProtKB/Swiss-Prot;Acc:Q9NV92]	GO:0043123 positive regulation of I-kappaB kinase/NF-kappaB cascade,GO:0042309 homoiothermy,GO:0050826 response to freezing	GO:0004871 signal transducer activity,GO:0050699 WW domain binding,GO:0050825 ice binding	GO:0016021 integral to membrane,GO:0016020 membrane,GO:0005737 cytoplasm,GO:0005768 endosome,GO:0005794 Golgi apparatus,GO:0000139 Golgi membrane,GO:0005783 endoplasmic reticulum,GO:0005739 mitochondrion,GO:0010008 endosome membrane	438.316	1655.15	414.958	1577.37	414.958	823.029	1.98341	0.987979			OK	OK
opHsV0400000218	opHsV0400000218	ENSG00000131871	-	55829	AC023024.6	Selenoprotein S (SelS)(VCP-interacting membrane protein) [Source:UniProtKB/Swiss-Prot;Acc:Q9BQE4]	GO:0006954 inflammatory response,GO:0045454 cell redox homeostasis,GO:0009749 response to glucose stimulus,GO:0030968 endoplasmic reticulum unfolded protein response,GO:0006886 intracellular protein transport,GO:0006916 anti-apoptosis,GO:0030433 ER-associated protein catabolic process,GO:0006980 redox signal response,GO:0045184 establishment of protein localization,GO:0006983 ER overload response…	GO:0004872 receptor activity,GO:0019899 enzyme binding,GO:0008430 selenium binding,GO:0016209 antioxidant activity	GO:0016021 integral to membrane,GO:0016020 membrane,GO:0005783 endoplasmic reticulum,GO:0005789 endoplasmic reticulum membrane,GO:0034361 very-low-density lipoprotein particle,GO:0030176 integral to endoplasmic reticulum membrane,GO:0034362 low-density lipoprotein particle	1276.63	4841.72	1253.27	4763.95	1253.27	2485.69	1.98336	0.987946			OK	OK
opHsV0400002326	opHsV0400002326	ENSG00000177246	-	-	AL008627.1	-	-	-	-	405.133	1528.55	381.775	1450.77	381.775	756.973	1.98277	0.98752			OK	OK
H200012865	H200012865	ENSG00000173530	NM_003840	8793	TNFRSF10D	Tumor necrosis factor receptor superfamily member 10D Precursor (Decoy receptor 2)(DcR2)(TNF-related apoptosis-inducing ligand receptor 4)(TRAIL receptor 4)(TRAIL-R4)(TRAIL receptor with a truncated death domain)(CD264 antigen) [Source:UniProtKB/Swiss-Prot;Acc:Q9UBN6]	GO:0007165 signal transduction,GO:0006955 immune response,GO:0006915 apoptosis,GO:0006916 anti-apoptosis	GO:0005515 protein binding,GO:0004872 receptor activity,GO:0004888 transmembrane receptor activity	GO:0016021 integral to membrane,GO:0016020 membrane	130.93	486.502	107.572	408.723	107.572	213.26	1.98249	0.987316			OK	OK
H300020165	H300020165	ENSG00000141425	NM_018170;NM_018170;NM_018170	-	RPRD1A	Regulation of nuclear pre-mRNA domain-containing protein 1A (Cyclin-dependent kinase inhibitor 2B-related protein)(p15INK4B-related protein) [Source:UniProtKB/Swiss-Prot;Acc:Q96P16]	-	-	-	260.854	980.075	237.495	902.296	237.495	470.792	1.98232	0.987194			OK	OK
H200002306	H200002306	ENSG00000164615	NM_001745	819	CAMLG	Calcium signal-modulating cyclophilin ligand (CAML) [Source:UniProtKB/Swiss-Prot;Acc:P49069]	GO:0007173 epidermal growth factor receptor signaling pathway,GO:0006952 defense response,GO:0001881 receptor recycling	GO:0005515 protein binding	GO:0016021 integral to membrane,GO:0016020 membrane,GO:0005783 endoplasmic reticulum	847.523	3207.64	824.165	3129.86	824.165	1633.07	1.98149	0.986584			OK	OK
AHsV10001352	AHsV10001352	-	NM_006598.2	10723	SLC12A7	Solute carrier family 12 member 7 (Electroneutral potassium-chloride cotransporter 4)(K-Cl cotransporter 4) [Source:UniProtKB/Swiss-Prot;Acc:Q9Y666]	GO:0006810 transport,GO:0006811 ion transport,GO:0006813 potassium ion transport,GO:0006814 sodium ion transport,GO:0006821 chloride transport,GO:0006884 cell volume homeostasis	GO:0005215 transporter activity,GO:0015293 symporter activity,GO:0015379 potassium:chloride symporter activity,GO:0030955 potassium ion binding,GO:0015377 cation:chloride symporter activity	GO:0005887 integral to plasma membrane,GO:0016020 membrane,GO:0016021 integral to membrane	156.77	584.387	133.412	506.608	133.412	264.333	1.98133	0.986471			OK	OK
H200007476	H200007476	ENSG00000110619	NM_001014438;NM_001014438;NM_001014438;NM_001014438;NM_001014438	833	CARS	Cysteinyl-tRNA synthetase, cytoplasmic (EC 6.1.1.16)(Cysteine--tRNA ligase)(CysRS) [Source:UniProtKB/Swiss-Prot;Acc:P49589]	GO:0006412 translation,GO:0006423 cysteinyl-tRNA aminoacylation,GO:0006418 tRNA aminoacylation for protein translation	GO:0000166 nucleotide binding,GO:0005524 ATP binding,GO:0004817 cysteine-tRNA ligase activity,GO:0004812 aminoacyl-tRNA ligase activity	GO:0005737 cytoplasm	418.093	1575.16	394.735	1497.38	394.735	781.29	1.97928	0.984975			OK	OK
H300001243	H300001243	ENSG00000140743	NM_001802	1039	CDR2	Cerebellar degeneration-related protein 2 (Paraneoplastic cerebellar degeneration-associated antigen)(Major Yo paraneoplastic antigen) [Source:UniProtKB/Swiss-Prot;Acc:Q01850]	-	GO:0005515 protein binding,GO:0003674 molecular_function	GO:0005634 nucleus,GO:0005737 cytoplasm	282.352	1060.06	258.994	982.283	258.994	512.527	1.97892	0.984711			OK	OK
H200000798	H200000798	ENSG00000106460	NM_018374	54664	TMEM106B	Transmembrane protein 106B [Source:UniProtKB/Swiss-Prot;Acc:Q9NUM4]	-	-	GO:0016021 integral to membrane,GO:0016020 membrane	162.772	606.324	139.413	528.545	139.413	275.78	1.97814	0.984147			OK	OK
H300018969	H300018969	ENSG00000109689	NM_020860;NM_020860	-	STIM2	Stromal interaction molecule 2 Precursor [Source:UniProtKB/Swiss-Prot;Acc:Q9P246]	-	-	-	145.952	542.307	122.594	464.528	122.594	242.378	1.97708	0.983369			OK	OK
AHsV10002979	AHsV10002979	-	NM_020726.3	57486	NLN	Neurolysin, mitochondrial Precursor (EC 3.4.24.16)(Neurotensin endopeptidase)(Mitochondrial oligopeptidase M)(Microsomal endopeptidase)(MEP)(Angiotensin-binding protein) [Source:UniProtKB/Swiss-Prot;Acc:Q9BYT8]	GO:0006508 proteolysis	GO:0004222 metalloendopeptidase activity,GO:0008237 metallopeptidase activity,GO:0008270 zinc ion binding	-	124.351	460.407	100.992	382.628	100.992	199.644	1.97683	0.983188			OK	OK
DHsGV10002234	DHsGV10002234	-	-	100294203	LOC100294203	-	-	-	-	220.547	824.549	197.188	746.77	197.188	389.643	1.976	0.982581			OK	OK
H200010654	H200010654	ENSG00000066777	NM_006421	10565	ARFGEF1	Brefeldin A-inhibited guanine nucleotide-exchange protein 1 (Brefeldin A-inhibited GEP 1)(p200 ARF-GEP1)(p200 ARF guanine nucleotide exchange factor) [Source:UniProtKB/Swiss-Prot;Acc:Q9Y6D6]	GO:0006887 exocytosis,GO:0032012 regulation of ARF protein signal transduction	GO:0005488 binding,GO:0017022 myosin binding,GO:0005086 ARF guanyl-nucleotide exchange factor activity	GO:0005622 intracellular	140.192	520.032	116.833	442.253	116.833	230.755	1.97508	0.98191			OK	OK
CHsGV10000880	CHsGV10000880	-	NM_018210.2	55739	CARKD	carbohydrate kinase domain containing [Source:RefSeq peptide;Acc:NP_060680]	GO:0009228 thiamin biosynthetic process	GO:0004417 hydroxyethylthiazole kinase activity	-	251.406	940.768	228.048	862.989	228.048	450.283	1.97451	0.981496			OK	OK
CHsGV10000083	CHsGV10000083	-	NM_020156.2	56913	C1GALT1	Glycoprotein-N-acetylgalactosamine 3-beta-galactosyltransferase 1 (EC 2.4.1.122)(Core 1 beta1,3-galactosyltransferase 1)(Core 1 beta3-Gal-T)(C1GalT1)(Core1 UDP-galactose:N-acetylgalactosamine-alpha-R beta 1,3-galactosyltransferase 1)(Beta 1,3-galactosyltransferase)(Core 1 O-glycan T-synthase)(B3Gal-T8) [Source:UniProtKB/Swiss-Prot;Acc:Q9NS00]	GO:0001525 angiogenesis,GO:0007275 multicellular organismal development,GO:0001822 kidney development,GO:0030154 cell differentiation	GO:0000287 magnesium ion binding,GO:0016263 glycoprotein-N-acetylgalactosamine 3-beta-galactosyltransferase activity	GO:0016021 integral to membrane,GO:0016020 membrane	245.576	917.306	222.218	839.527	222.218	438.041	1.97123	0.979093			OK	OK
H200000848	H200000848	ENSG00000143013	NM_006769	8543	LMO4	LIM domain transcription factor LMO4 (LIM domain only protein 4)(LMO-4)(Breast tumor autoantigen) [Source:UniProtKB/Swiss-Prot;Acc:P61968]	GO:0006366 transcription from RNA polymerase II promoter,GO:0006350 transcription,GO:0006355 regulation of transcription, DNA-dependent,GO:0001843 neural tube closure	GO:0008270 zinc ion binding,GO:0046872 metal ion binding,GO:0003700 transcription factor activity,GO:0008134 transcription factor binding	GO:0005667 transcription factor complex	314.107	1176.18	290.748	1098.4	290.748	573.113	1.97117	0.979049			OK	OK
AHsV10001663	AHsV10001663	-	NM_172364.4	93589	CACNA2D4	Voltage-dependent calcium channel subunit alpha-2/delta-4 Precursor (Voltage-gated calcium channel subunit alpha-2/delta-4) [Contains Voltage-dependent calcium channel subunit alpha-2-4;Voltage-dependent calcium channel subunit delta-4] [Source:UniProtKB/	GO:0006811 ion transport,GO:0006816 calcium ion transport,GO:0007601 visual perception,GO:0050896 response to stimulus	GO:0005244 voltage-gated ion channel activity,GO:0005262 calcium channel activity,GO:0005509 calcium ion binding	GO:0016020 membrane,GO:0016021 integral to membrane	206.625	769.433	183.266	691.654	183.266	360.885	1.96918	0.977597			OK	OK
opHsV0400006251	opHsV0400006251	ENSG00000185022	NM_012323	23764	MAFF	Transcription factor MafF (V-maf musculoaponeurotic fibrosarcoma oncogene homolog F)(U-Maf) [Source:UniProtKB/Swiss-Prot;Acc:Q9ULX9]	GO:0006950 response to stress,GO:0006366 transcription from RNA polymerase II promoter,GO:0001701 in utero embryonic development,GO:0006355 regulation of transcription, DNA-dependent,GO:0045449 regulation of transcription,GO:0007567 parturition,GO:0045604 regulation of epidermal cell differentiation	GO:0003677 DNA binding,GO:0003700 transcription factor activity,GO:0043565 sequence-specific DNA binding,GO:0046983 protein dimerization activity	GO:0005634 nucleus	140.326	519.114	116.967	441.335	116.967	230.276	1.96873	0.977262			OK	OK
opHsV0400010727	opHsV0400010727	ENSG00000139514	NM_003045	6541	SLC7A1	High affinity cationic amino acid transporter 1 (CAT-1)(CAT1)(System Y+ basic amino acid transporter)(Solute carrier family 7 member 1)(Ecotropic retroviral leukemia receptor homolog)(Ecotropic retrovirus receptor homolog)(ERR) [Source:UniProtKB/Swiss-Prot;Acc:P30825]	GO:0006810 transport,GO:0006814 sodium ion transport,GO:0006865 amino acid transport,GO:0015809 arginine transport	GO:0004872 receptor activity,GO:0015171 amino acid transmembrane transporter activity,GO:0015181 arginine transmembrane transporter activity,GO:0005283 sodium:amino acid symporter activity	GO:0016021 integral to membrane,GO:0016020 membrane,GO:0005887 integral to plasma membrane	369.246	1382.63	345.887	1304.85	345.887	680.833	1.96837	0.976999			OK	OK
H200009901	H200009901	ENSG00000107651	NM_007190	11196	SEC23IP	SEC23-interacting protein (p125) [Source:UniProtKB/Swiss-Prot;Acc:Q9Y6Y8]	GO:0006886 intracellular protein transport,GO:0007030 Golgi organization	GO:0005515 protein binding,GO:0046872 metal ion binding	GO:0016020 membrane,GO:0005737 cytoplasm,GO:0005783 endoplasmic reticulum,GO:0031410 cytoplasmic vesicle,GO:0005793 ER-Golgi intermediate compartment	269.252	1003.96	245.893	926.178	245.893	483.253	1.9653	0.974747			OK	OK
H200001774	H200001774	ENSG00000174953	NM_020865	170506	DHX36	Probable ATP-dependent RNA helicase DHX36 (EC 3.6.1.-)(DEAH box protein 36)(MLE-like protein 1)(RNA helicase associated with AU-rich element ARE) [Source:UniProtKB/Swiss-Prot;Acc:Q9H2U1]	-	GO:0000166 nucleotide binding,GO:0005524 ATP binding,GO:0003676 nucleic acid binding,GO:0017111 nucleoside-triphosphatase activity,GO:0004386 helicase activity,GO:0008026 ATP-dependent helicase activity	-	194.865	723.573	171.506	645.794	171.506	336.957	1.96469	0.974303			OK	OK
H200007745	H200007745	ENSG00000049449	NM_002901	5954	RCN1	Reticulocalbin-1 Precursor [Source:UniProtKB/Swiss-Prot;Acc:Q15293]	-	GO:0005509 calcium ion binding	GO:0005783 endoplasmic reticulum,GO:0005788 endoplasmic reticulum lumen	825.532	3098.25	802.173	3020.48	802.173	1576	1.96466	0.97428			OK	OK
H200017254	H200017254	ENSG00000169660	NM_173620	-	HEXDC	Hexosaminidase domain-containing protein (EC 3.2.1.-) [Source:UniProtKB/Swiss-Prot;Acc:Q8WVB3]	GO:0005975 carbohydrate metabolic process,GO:0008152 metabolic process	GO:0043169 cation binding,GO:0016798 hydrolase activity, acting on glycosyl bonds	-	272.107	1013.41	248.748	935.631	248.748	488.185	1.96257	0.972743			OK	OK
H300006273	H300006273	ENSG00000170095	-	-	AC107059.6	-	-	-	-	222.317	825.683	198.959	747.904	198.959	390.235	1.96138	0.971872			OK	OK
H300018808	H300018808	ENSG00000108588	NM_020198	57003	CCDC47	Coiled-coil domain-containing protein 47 Precursor [Source:UniProtKB/Swiss-Prot;Acc:Q96A33]	GO:0008150 biological_process	GO:0005515 protein binding	GO:0016021 integral to membrane,GO:0016020 membrane,GO:0005575 cellular_component	1157.57	4341.08	1134.22	4263.3	1134.22	2224.47	1.96124	0.971766			OK	OK
H300002995	H300002995	ENSG00000176231	NM_001004465	126541	OR10H4	Olfactory receptor 10H4 (Olfactory receptor OR19-28) [Source:UniProtKB/Swiss-Prot;Acc:Q8NGA5]	GO:0007165 signal transduction,GO:0007186 G-protein coupled receptor protein signaling pathway,GO:0050896 response to stimulus,GO:0007608 sensory perception of smell	GO:0004872 receptor activity,GO:0004984 olfactory receptor activity,GO:0004949 cannabinoid receptor activity,GO:0004977 melanocortin receptor activity,GO:0004932 mating-type factor pheromone receptor activity	GO:0005886 plasma membrane,GO:0016021 integral to membrane,GO:0016020 membrane	682.104	2553.26	658.745	2475.48	658.745	1291.63	1.96075	0.971404			OK	OK
H300000880	H300000880	ENSG00000198040	NM_003428;NM_003428	7637	ZNF84	Zinc finger protein 84 (Zinc finger protein HPF2) [Source:UniProtKB/Swiss-Prot;Acc:P51523]	GO:0006350 transcription,GO:0006355 regulation of transcription, DNA-dependent	GO:0003677 DNA binding,GO:0008270 zinc ion binding,GO:0046872 metal ion binding,GO:0003676 nucleic acid binding	GO:0005634 nucleus,GO:0005622 intracellular	308.031	1146.54	284.672	1068.77	284.672	557.652	1.95892	0.970061			OK	OK
H200000958	H200000958	ENSG00000090615	NM_005895	2802	GOLGA3	Golgin subfamily A member 3 (Golgin-160)(Golgi complex-associated protein of 170 kDa)(GCP170) [Source:UniProtKB/Swiss-Prot;Acc:Q08378]	GO:0045449 regulation of transcription,GO:0006891 intra-Golgi vesicle-mediated transport	GO:0005515 protein binding,GO:0005215 transporter activity,GO:0030528 transcription regulator activity	GO:0016020 membrane,GO:0005634 nucleus,GO:0005737 cytoplasm,GO:0005794 Golgi apparatus,GO:0000139 Golgi membrane,GO:0005793 ER-Golgi intermediate compartment,GO:0017119 Golgi transport complex	336.647	1253.78	313.288	1176	313.288	613.604	1.95859	0.969817			OK	OK
H300021092	H300021092	ENSG00000166971	NM_001012398;NM_022476	64400	FTS	AKT-interacting protein (Fused toes protein homolog)(Ft1) [Source:UniProtKB/Swiss-Prot;Acc:Q9H8T0]	GO:0001934 positive regulation of protein amino acid phosphorylation,GO:0043687 post-translational protein modification,GO:0051246 regulation of protein metabolic process,GO:0032092 positive regulation of protein binding	GO:0005515 protein binding,GO:0019787 small conjugating protein ligase activity	GO:0005886 plasma membrane	291.025	1082.4	267.667	1004.62	267.667	524.185	1.95835	0.969636			OK	OK
H200000018	H200000018	ENSG00000127947	NM_002835;NM_002835	5782	PTPN12	Tyrosine-protein phosphatase non-receptor type 12 (EC 3.1.3.48)(Protein-tyrosine phosphatase G1)(PTPG1)(PTP-PEST) [Source:UniProtKB/Swiss-Prot;Acc:Q05209]	GO:0006470 protein amino acid dephosphorylation,GO:0016311 dephosphorylation	GO:0005515 protein binding,GO:0016787 hydrolase activity,GO:0004872 receptor activity,GO:0017124 SH3 domain binding,GO:0004725 protein tyrosine phosphatase activity,GO:0016791 phosphatase activity,GO:0004726 non-membrane spanning protein tyrosine phosphatase activity	GO:0005737 cytoplasm,GO:0005829 cytosol,GO:0005625 soluble fraction	957.185	3579.3	933.827	3501.52	933.827	1827	1.95646	0.968247			OK	OK
H200012872	H200012872	ENSG00000179943	NM_032836	84922	FIZ1	Flt3-interacting zinc finger protein 1 (Zinc finger protein 798) [Source:UniProtKB/Swiss-Prot;Acc:Q96SL8]	GO:0006350 transcription,GO:0006355 regulation of transcription, DNA-dependent	GO:0008270 zinc ion binding,GO:0046872 metal ion binding,GO:0003676 nucleic acid binding,GO:0019901 protein kinase binding,GO:0009055 electron carrier activity,GO:0005102 receptor binding	GO:0005634 nucleus,GO:0005622 intracellular,GO:0005737 cytoplasm	136.345	501.274	112.986	423.495	112.986	220.967	1.9557	0.967687			OK	OK
opHsV0400012987	opHsV0400012987	ENSG00000003989	NM_003046;NM_003046	6542	SLC7A2	Low affinity cationic amino acid transporter 2 (CAT-2)(CAT2)(Solute carrier family 7 member 2) [Source:UniProtKB/Swiss-Prot;Acc:P52569]	GO:0006810 transport,GO:0006865 amino acid transport,GO:0006520 amino acid metabolic process	GO:0015171 amino acid transmembrane transporter activity,GO:0015174 basic amino acid transmembrane transporter activity	GO:0016021 integral to membrane,GO:0016020 membrane,GO:0005624 membrane fraction,GO:0005737 cytoplasm,GO:0005887 integral to plasma membrane	493.077	1837.8	469.719	1760.02	469.719	918.328	1.95506	0.967213			OK	OK
H300019618	H300019618	ENSG00000013561	NM_004290;NM_004290;NM_183398;NM_183398;NM_183398	9604	RNF14	E3 ubiquitin-protein ligase RNF14 (EC 6.3.2.-)(RING finger protein 14)(Androgen receptor-associated protein 54)(Triad2 protein)(HFB30) [Source:UniProtKB/Swiss-Prot;Acc:Q9UBS8]	GO:0007165 signal transduction,GO:0006350 transcription,GO:0006511 ubiquitin-dependent protein catabolic process,GO:0016567 protein ubiquitination,GO:0006357 regulation of transcription from RNA polymerase II promoter,GO:0045893 positive regulation of transcription, DNA-dependent,GO:0030521 androgen receptor signaling pathway,GO:0032355 response to estradiol stimulus	GO:0005515 protein binding,GO:0008270 zinc ion binding,GO:0046872 metal ion binding,GO:0016874 ligase activity,GO:0009055 electron carrier activity,GO:0003713 transcription coactivator activity,GO:0016881 acid-amino acid ligase activity,GO:0019787 small conjugating protein ligase activity,GO:0050681 androgen receptor binding	GO:0005634 nucleus,GO:0005737 cytoplasm	207.714	768.415	184.355	690.636	184.355	360.354	1.95467	0.966929			OK	OK
H300019533	H300019533	ENSG00000111371	NM_001077484	-	SLC38A1	Sodium-coupled neutral amino acid transporter 1 (Amino acid transporter A1)(System A amino acid transporter 1)(System N amino acid transporter 1)(N-system amino acid transporter 2)(Solute carrier family 38 member 1) [Source:UniProtKB/Swiss-Prot;Acc:Q9H2H9]	-	-	-	816.755	3047.64	793.396	2969.86	793.396	1549.59	1.95311	0.965772			OK	OK
AHsV10001599	AHsV10001599	-	NM_001001132.1	6453	ITSN1	Intersectin-1 (SH3 domain-containing protein 1A)(SH3P17) [Source:UniProtKB/Swiss-Prot;Acc:Q15811]	-	GO:0005509 calcium ion binding	-	230.742	853.987	207.383	776.208	207.383	405.003	1.95292	0.965633			OK	OK
AHsV10002268	AHsV10002268	-	NM_080875.1	142678	MIB2	E3 ubiquitin-protein ligase MIB2 (EC 6.3.2.-)(Mind bomb homolog 2)(Zinc finger ZZ type with ankyrin repeat domain protein 1)(Skeletrophin)(Novel zinc finger protein)(Novelzin)(Putative NF-kappa-B-activating protein 002N) [Source:UniProtKB/Swiss-Prot;Acc:Q	GO:0007219 Notch signaling pathway,GO:0016567 protein ubiquitination,GO:0019941 modification-dependent protein catabolic process,GO:0043123 positive regulation of I-kappaB kinase/NF-kappaB cascade	GO:0003779 actin binding,GO:0004842 ubiquitin-protein ligase activity,GO:0004871 signal transducer activity,GO:0005515 protein binding,GO:0008270 zinc ion binding,GO:0016874 ligase activity,GO:0046872 metal ion binding	GO:0005737 cytoplasm,GO:0005768 endosome	124.974	458.025	101.615	380.246	101.615	198.402	1.95247	0.965304			OK	OK
H200013833	H200013833	ENSG00000138592	NM_005154;NM_005154	9101	USP8	Ubiquitin carboxyl-terminal hydrolase 8 (EC 3.1.2.15)(Ubiquitin thioesterase 8)(Ubiquitin-specific-processing protease 8)(Deubiquitinating enzyme 8)(hUBPy) [Source:UniProtKB/Swiss-Prot;Acc:P40818]	GO:0006511 ubiquitin-dependent protein catabolic process,GO:0008283 cell proliferation,GO:0006265 DNA topological change	GO:0005515 protein binding,GO:0008233 peptidase activity,GO:0004221 ubiquitin thiolesterase activity,GO:0004197 cysteine-type endopeptidase activity,GO:0017124 SH3 domain binding,GO:0003690 double-stranded DNA binding,GO:0004843 ubiquitin-specific protease activity	GO:0005634 nucleus	213.042	787.048	189.683	709.269	189.683	370.076	1.95102	0.964232			OK	OK
opHsV0400003043	opHsV0400003043	ENSG00000179820	NM_138373;NM_138373;NM_138373	91663	MYADM	Myeloid-associated differentiation marker (SB135) [Source:UniProtKB/Swiss-Prot;Acc:Q96S97]	-	-	GO:0016021 integral to membrane,GO:0016020 membrane	513.975	1911.49	490.617	1833.71	490.617	956.776	1.95015	0.963585			OK	OK
opHsV0400000297	opHsV0400000297	ENSG00000104763	NM_004315;NM_004315	427	ASAH1	Acid ceramidase Precursor (AC)(EC 3.5.1.23)(Acylsphingosine deacylase)(N-acylsphingosine amidohydrolase)(Putative 32 kDa heart protein)(PHP32) [Contains Acid ceramidase subunit alpha;Acid ceramidase subunit beta] [Source:UniProtKB/Swiss-Prot;Acc:Q13510]	GO:0006629 lipid metabolic process,GO:0030324 lung development,GO:0010033 response to organic substance	-	GO:0005764 lysosome	672.423	2500.2	649.064	2422.42	649.064	1263.95	1.94734	0.961506			OK	OK
H200008225	H200008225	ENSG00000158158	NM_020184	26504	CNNM4	Metal transporter CNNM4 (Cyclin-M4)(Ancient conserved domain-containing protein 4) [Source:UniProtKB/Swiss-Prot;Acc:Q6P4Q7]	GO:0006811 ion transport	-	GO:0005886 plasma membrane,GO:0016021 integral to membrane	129.262	472.695	105.903	394.916	105.903	206.056	1.9457	0.96029			OK	OK
H200002807	H200002807	ENSG00000182208	-	-	AC091196.6	Mps one binder kinase activator-like 2 (Mob2 homolog)(HCCA2) [Source:UniProtKB/Swiss-Prot;Acc:Q70IA6]	-	GO:0005515 protein binding	-	154.983	568.587	131.625	490.808	131.625	256.09	1.94561	0.96022			OK	OK
AHsV10001283	AHsV10001283	-	NM_080667.5	112942	CCDC104	Coiled-coil domain-containing protein 104 [Source:UniProtKB/Swiss-Prot;Acc:Q96G28]	-	-	-	365.317	1352.63	341.959	1274.85	341.959	665.181	1.94521	0.959924			OK	OK
DHsTV10000045	DHsTV10000045	-	-	284701	-	-	-	-	-	161.974	594.341	138.616	516.562	138.616	269.527	1.94442	0.959339			OK	OK
H200015567	H200015567	ENSG00000084733	NM_016131	10890	RAB10	Ras-related protein Rab-10 [Source:UniProtKB/Swiss-Prot;Acc:P61026]	GO:0007165 signal transduction,GO:0006355 regulation of transcription, DNA-dependent,GO:0015031 protein transport,GO:0007264 small GTPase mediated signal transduction,GO:0006886 intracellular protein transport,GO:0006913 nucleocytoplasmic transport	GO:0005515 protein binding,GO:0000166 nucleotide binding,GO:0005524 ATP binding,GO:0005525 GTP binding,GO:0003924 GTPase activity,GO:0008134 transcription factor binding	GO:0005886 plasma membrane,GO:0005622 intracellular,GO:0005794 Golgi apparatus	553.829	2052.04	530.471	1974.26	530.471	1030.11	1.94188	0.957456			OK	OK
AHsV10002901	AHsV10002901	-	NM_152392.2	130872	AHSA2	Activator of 90 kDa heat shock protein ATPase homolog 2 [Source:UniProtKB/Swiss-Prot;Acc:Q719I0]	-	-	-	195.541	718.543	172.183	640.764	172.183	334.332	1.94173	0.957344			OK	OK
H200001725	H200001725	ENSG00000108840	NM_001015053;NM_001015053;NM_001015053	-	HDAC5	Histone deacetylase 5 (HD5)(EC 3.5.1.98)(Antigen NY-CO-9) [Source:UniProtKB/Swiss-Prot;Acc:Q9UQL6]	GO:0006412 translation,GO:0016568 chromatin modification,GO:0006422 aspartyl-tRNA aminoacylation	GO:0000166 nucleotide binding,GO:0005524 ATP binding,GO:0004815 aspartate-tRNA ligase activity,GO:0004407 histone deacetylase activity	GO:0005737 cytoplasm,GO:0000118 histone deacetylase complex	265.834	980.073	242.475	902.294	242.475	470.791	1.9416	0.957249			OK	OK
H200012823	H200012823	ENSG00000072401	NM_003338	-	UBE2D1	Ubiquitin-conjugating enzyme E2 D1 (EC 6.3.2.19)(Ubiquitin-protein ligase D1)(Ubiquitin carrier protein D1)(UbcH5)(Ubiquitin-conjugating enzyme E2-17 kDa 1)(E2(17)KB 1)(UBC4/5 homolog)(Stimulator of Fe transport)(SFT) [Source:UniProtKB/Swiss-Prot;Acc:P51668]	GO:0043687 post-translational protein modification,GO:0051246 regulation of protein metabolic process	GO:0019787 small conjugating protein ligase activity	-	249.769	920.191	226.41	842.412	226.41	439.547	1.94137	0.957077			OK	OK
H200012023	H200012023	ENSG00000214367	NM_024511	79441	C4orf15	Uncharacterized protein C4orf15 [Source:UniProtKB/Swiss-Prot;Acc:Q68CZ6]	-	-	-	136.907	500.146	113.548	422.367	113.548	220.379	1.94084	0.956683			OK	OK
H200017453	H200017453	ENSG00000153113	NM_173060;NM_173060;NM_173060;NM_173060;NM_173061;NM_173061;NM_173061;NM_173061;NM_173061;NM_173061	-	CAST	Calpastatin (Calpain inhibitor)(Sperm BS-17 component) [Source:UniProtKB/Swiss-Prot;Acc:P20810]	-	GO:0030161 calpain inhibitor activity	-	355.279	1312.3	331.92	1234.52	331.92	644.135	1.94063	0.956527			OK	OK
H300004646	H300004646	ENSG00000163320	NM_001008390	8545	CGGBP1	CGG triplet repeat-binding protein 1 (CGG-binding protein 1)(p20-CGGBP DNA-binding protein)(20 kDa CGG-binding protein) [Source:UniProtKB/Swiss-Prot;Acc:Q9UFW8]	GO:0006350 transcription,GO:0006355 regulation of transcription, DNA-dependent	GO:0003677 DNA binding,GO:0008270 zinc ion binding,GO:0003676 nucleic acid binding,GO:0003690 double-stranded DNA binding	GO:0005634 nucleus	297.411	1096.64	274.052	1018.86	274.052	531.613	1.93982	0.955926			OK	OK
CHsGV10002699	CHsGV10002699	-	NM_004703.4;NM_001083585.1	9135	RABEP1	Rab GTPase-binding effector protein 1 (Rabaptin-5)(Rabaptin-5alpha)(Rabaptin-4)(Renal carcinoma antigen NY-REN-17) [Source:UniProtKB/Swiss-Prot;Acc:Q15276]	GO:0009405 pathogenesis	GO:0008083 growth factor activity,GO:0005096 GTPase activator activity,GO:0016791 phosphatase activity	-	148.558	543.012	125.2	465.233	125.2	242.745	1.93886	0.955212			OK	OK
CHsGV10000278	CHsGV10000278	-	NM_003861.2	8816	DCAF5	WD repeat-containing protein 22 (Breakpoint cluster region protein 2)(BCRP2) [Source:UniProtKB/Swiss-Prot;Acc:Q96JK2]	-	-	-	203.899	748.589	180.541	670.81	180.541	350.009	1.93867	0.955069			OK	OK
H300020350	H300020350	ENSG00000186591	NM_003344	7328	UBE2H	Ubiquitin-conjugating enzyme E2 H (EC 6.3.2.19)(Ubiquitin-protein ligase H)(Ubiquitin carrier protein H)(UbcH2)(E2-20K) [Source:UniProtKB/Swiss-Prot;Acc:P62256]	GO:0016567 protein ubiquitination,GO:0043687 post-translational protein modification,GO:0051246 regulation of protein metabolic process	GO:0004842 ubiquitin-protein ligase activity,GO:0019787 small conjugating protein ligase activity	-	241.33	887.249	217.972	809.469	217.972	422.358	1.93768	0.954327			OK	OK
H300019549	H300019549	ENSG00000083520	NM_014953	22894	DIS3	Exosome complex exonuclease RRP44 (EC 3.1.13.-)(Ribosomal RNA-processing protein 44)(Protein DIS3 homolog) [Source:UniProtKB/Swiss-Prot;Acc:Q9Y2L1]	GO:0006364 rRNA processing	GO:0005515 protein binding,GO:0016787 hydrolase activity,GO:0003723 RNA binding,GO:0004527 exonuclease activity,GO:0004540 ribonuclease activity,GO:0016219 GDP-dissociation stimulator activity	GO:0005634 nucleus,GO:0005737 cytoplasm,GO:0000178 exosome (RNase complex)	149.504	545.716	126.146	467.937	126.146	244.156	1.93551	0.952712			OK	OK
H200004795	H200004795	ENSG00000196449	NM_024640	79693	YRDC	YrdC domain-containing protein, mitochondrial Precursor (Ischemia/reperfusion-inducible protein homolog)(hIRIP)(Dopamine receptor-interacting protein 3) [Source:UniProtKB/Swiss-Prot;Acc:Q86U90]	-	-	GO:0016020 membrane,GO:0005739 mitochondrion	199.977	732.822	176.618	655.043	176.618	341.783	1.93515	0.952447			OK	OK
H300022213	H300022213	ENSG00000078674	-	-	PCM1	Pericentriolar material 1 protein (PCM-1)(hPCM-1) [Source:UniProtKB/Swiss-Prot;Acc:Q15154]	-	-	-	400.037	1474.32	376.679	1396.54	376.679	728.676	1.93447	0.951942			OK	OK
H200007838	H200007838	ENSG00000143093	NM_033088;NM_033088	85369	FAM40A	Protein FAM40A [Source:UniProtKB/Swiss-Prot;Acc:Q5VSL9]	GO:0008150 biological_process	GO:0003674 molecular_function	GO:0005634 nucleus	204.802	750.187	181.443	672.408	181.443	350.843	1.93363	0.951309			OK	OK
opHsV0400000263	opHsV0400000263	ENSG00000136802	NM_019594;NM_019594	56262	LRRC8A	Leucine-rich repeat-containing protein 8A [Source:UniProtKB/Swiss-Prot;Acc:Q8IWT6]	-	GO:0005515 protein binding	GO:0016021 integral to membrane,GO:0016020 membrane	183.226	670.168	159.868	592.389	159.868	309.092	1.93342	0.951157			OK	OK
H300019458	H300019458	ENSG00000136758	NM_014263;NM_014263	-	YME1L1	ATP-dependent metalloprotease YME1L1 (EC 3.4.24.-)(YME1-like protein 1)(ATP-dependent metalloprotease FtsH1)(Meg-4)(Presenilin-associated metalloprotease)(PAMP) [Source:UniProtKB/Swiss-Prot;Acc:Q96TA2]	-	-	-	803.688	2969.23	780.33	2891.45	780.33	1508.68	1.93338	0.951127			OK	OK
H300020698	H300020698	ENSG00000147454	-	51312	SLC25A37	Mitoferrin-1 (Mitochondrial iron transporter 1)(Solute carrier family 25 member 37)(Mitochondrial solute carrier protein) [Source:UniProtKB/Swiss-Prot;Acc:Q9NYZ2]	GO:0006811 ion transport,GO:0006810 transport,GO:0048250 mitochondrial iron ion transport	GO:0005488 binding,GO:0005506 iron ion binding,GO:0005215 transporter activity,GO:0005381 iron ion transmembrane transporter activity	GO:0016021 integral to membrane,GO:0016020 membrane,GO:0005739 mitochondrion,GO:0005743 mitochondrial inner membrane	174.821	638.887	151.462	561.108	151.462	292.77	1.93296	0.950813			OK	OK
H200003165	H200003165	ENSG00000018510	NM_003659	-	AGPS	Alkyldihydroxyacetonephosphate synthase, peroxisomal Precursor (Alkyl-DHAP synthase)(EC 2.5.1.26)(Alkylglycerone-phosphate synthase)(Aging-associated gene 5 protein) [Source:UniProtKB/Swiss-Prot;Acc:O00116]	GO:0042221 response to chemical stimulus	GO:0003824 catalytic activity,GO:0050660 FAD binding	GO:0005739 mitochondrion,GO:0005777 peroxisome	561.94	2070.69	538.582	1992.91	538.582	1039.84	1.93071	0.949128			OK	OK
AHsV10003551	AHsV10003551	-	NM_024881.4	79939	SLC35E1	Solute carrier family 35 member E1 [Source:UniProtKB/Swiss-Prot;Acc:Q96K37]	-	-	-	125.717	456.352	102.359	378.573	102.359	197.529	1.92977	0.948427			OK	OK
H300019967	H300019967	ENSG00000056097	NM_016107	-	ZFR	Zinc finger RNA-binding protein (hZFR)(M-phase phosphoprotein homolog) [Source:UniProtKB/Swiss-Prot;Acc:Q96KR1]	GO:0006412 translation,GO:0006355 regulation of transcription, DNA-dependent,GO:0042309 homoiothermy,GO:0050826 response to freezing	GO:0003677 DNA binding,GO:0003735 structural constituent of ribosome,GO:0008270 zinc ion binding,GO:0003676 nucleic acid binding,GO:0004879 ligand-dependent nuclear receptor activity,GO:0050825 ice binding	GO:0005634 nucleus,GO:0005622 intracellular,GO:0005840 ribosome	428.296	1575.29	404.938	1497.51	404.938	781.361	1.92958	0.948288			OK	OK
AHsV10002515	AHsV10002515	-	NM_005072.3	6560	SLC12A4	Solute carrier family 12 member 4 (Electroneutral potassium-chloride cotransporter 1)(Erythroid K-Cl cotransporter 1)(hKCC1) [Source:UniProtKB/Swiss-Prot;Acc:Q9UP95]	GO:0006810 transport,GO:0006811 ion transport,GO:0006813 potassium ion transport,GO:0006814 sodium ion transport,GO:0006821 chloride transport,GO:0006884 cell volume homeostasis	GO:0005215 transporter activity,GO:0015293 symporter activity,GO:0015379 potassium:chloride symporter activity,GO:0030955 potassium ion binding,GO:0015377 cation:chloride symporter activity	GO:0005624 membrane fraction,GO:0005887 integral to plasma membrane,GO:0016020 membrane,GO:0016021 integral to membrane	297.61	1090.69	274.251	1012.91	274.251	528.51	1.9271	0.946432			OK	OK
AHsV10003599	AHsV10003599	-	NM_004180.2	10010	TANK	TRAF family member-associated NF-kappa-B activator (TRAF-interacting protein)(I-TRAF) [Source:UniProtKB/Swiss-Prot;Acc:Q92844]	GO:0007165 signal transduction	GO:0005515 protein binding,GO:0008270 zinc ion binding,GO:0046872 metal ion binding	GO:0005737 cytoplasm	458.688	1685.29	435.33	1607.51	435.33	838.754	1.92671	0.946139			OK	OK
H200001977	H200001977	ENSG00000116285	NM_018948	54206	ERRFI1	ERBB receptor feedback inhibitor 1 (Mitogen-inducible gene 6 protein)(Mig-6) [Source:UniProtKB/Swiss-Prot;Acc:Q9UJM3]	GO:0006950 response to stress	GO:0005515 protein binding,GO:0005100 Rho GTPase activator activity	GO:0005737 cytoplasm	653.324	2401.18	629.966	2323.4	629.966	1212.28	1.92436	0.944382			OK	OK
H300004810	H300004810	ENSG00000147974	-	-	AL356489.14	-	-	-	-	154.179	560.095	130.82	482.316	130.82	251.659	1.9237	0.943885			OK	OK
H200019688	H200019688	ENSG00000100664	NM_001969;NM_001969	1983	EIF5	Eukaryotic translation initiation factor 5 (eIF-5) [Source:UniProtKB/Swiss-Prot;Acc:P55010]	GO:0006413 translational initiation,GO:0006446 regulation of translational initiation	GO:0005488 binding,GO:0000166 nucleotide binding,GO:0005525 GTP binding,GO:0003924 GTPase activity,GO:0003743 translation initiation factor activity	GO:0005737 cytoplasm,GO:0005829 cytosol	791.022	2903.67	767.664	2825.89	767.664	1474.47	1.92073	0.941651			OK	OK
opHsV0400000622	opHsV0400000622	ENSG00000164181	NM_024930	79993	ELOVL7	Elongation of very long chain fatty acids protein 7 [Source:UniProtKB/Swiss-Prot;Acc:A1L3X0]	GO:0006633 fatty acid biosynthetic process	-	GO:0016021 integral to membrane,GO:0016020 membrane,GO:0005783 endoplasmic reticulum,GO:0005789 endoplasmic reticulum membrane	124.074	448.155	100.716	370.376	100.716	193.252	1.91878	0.940191			OK	OK
H300021158	H300021158	ENSG00000168003	NM_002394;NM_002394;NM_002394;NM_001013251;NM_001013251	6520	SLC3A2	4F2 cell-surface antigen heavy chain (4F2hc)(Lymphocyte activation antigen 4F2 large subunit)(4F2 heavy chain antigen)(CD98 antigen) [Source:UniProtKB/Swiss-Prot;Acc:P08195]	GO:0005975 carbohydrate metabolic process,GO:0006810 transport,GO:0006865 amino acid transport,GO:0006816 calcium ion transport,GO:0016049 cell growth,GO:0015833 peptide transport,GO:0015827 tryptophan transport	GO:0005515 protein binding,GO:0005524 ATP binding,GO:0003824 catalytic activity,GO:0043169 cation binding,GO:0015197 peptide transporter activity,GO:0005432 calcium:sodium antiporter activity	GO:0005886 plasma membrane,GO:0016021 integral to membrane,GO:0016020 membrane,GO:0016324 apical plasma membrane,GO:0009986 cell surface,GO:0042470 melanosome	2051.59	7536.46	2028.24	7458.68	2028.24	3891.73	1.91877	0.940184			OK	OK
H200007570	H200007570	ENSG00000081087	NM_014028	28962	OSTM1	Osteopetrosis-associated transmembrane protein 1 Precursor [Source:UniProtKB/Swiss-Prot;Acc:Q86WC4]	GO:0030316 osteoclast differentiation	GO:0005515 protein binding	GO:0016021 integral to membrane,GO:0016020 membrane,GO:0005829 cytosol	305.704	1115.89	282.346	1038.11	282.346	541.657	1.91841	0.939915			OK	OK
H200000649	H200000649	ENSG00000121552	NM_005213	1475	CSTA	Cystatin-A (Cystatin-AS)(Stefin-A) [Source:UniProtKB/Swiss-Prot;Acc:P01040]	GO:0030216 keratinocyte differentiation,GO:0018149 peptide cross-linking,GO:0010466 negative regulation of peptidase activity	GO:0005198 structural molecule activity,GO:0004866 endopeptidase inhibitor activity,GO:0002020 protease binding,GO:0030674 protein binding, bridging,GO:0004869 cysteine protease inhibitor activity	GO:0005634 nucleus,GO:0005622 intracellular,GO:0005737 cytoplasm,GO:0001533 cornified envelope	293.562	1071.24	270.204	993.465	270.204	518.362	1.91841	0.93991			OK	OK
H200003143	H200003143	ENSG00000129472	NM_032846	84932	RAB2B	Ras-related protein Rab-2B [Source:UniProtKB/Swiss-Prot;Acc:Q8WUD1]	GO:0007165 signal transduction,GO:0006355 regulation of transcription, DNA-dependent,GO:0015031 protein transport,GO:0007264 small GTPase mediated signal transduction,GO:0006886 intracellular protein transport,GO:0016192 vesicle-mediated transport,GO:0006913 nucleocytoplasmic transport	GO:0005515 protein binding,GO:0000166 nucleotide binding,GO:0005524 ATP binding,GO:0005525 GTP binding,GO:0003924 GTPase activity,GO:0008134 transcription factor binding	GO:0005886 plasma membrane,GO:0005622 intracellular,GO:0005794 Golgi apparatus,GO:0000139 Golgi membrane,GO:0005783 endoplasmic reticulum,GO:0005789 endoplasmic reticulum membrane	159.754	578.921	136.396	501.142	136.396	261.481	1.91708	0.938908			OK	OK
opHsV0400001509	opHsV0400001509	ENSG00000182831	NM_014117	29035	C16orf72	UPF0472 protein C16orf72 [Source:UniProtKB/Swiss-Prot;Acc:Q14CZ0]	-	-	-	147.285	532.59	123.927	454.811	123.927	237.307	1.9149	0.937271			OK	OK
AHsV10002269	AHsV10002269	-	NM_032374.3	84334	C14orf153	Kinesin light chain 1 (KLC 1) [Source:UniProtKB/Swiss-Prot;Acc:Q07866]	GO:0008629 induction of apoptosis by intracellular signals	-	GO:0005739 mitochondrion	255.587	929.87	232.229	852.091	232.229	444.597	1.91448	0.936952			OK	OK
DHsGV10002211	DHsGV10002211	-	-	100288082	-	-	-	-	-	1276.08	4672.22	1252.73	4594.44	1252.73	2397.25	1.91362	0.936307			OK	OK
opHsV0400003973	opHsV0400003973	ENSG00000113580	NM_000176;NM_000176	2908	NR3C1	Glucocorticoid receptor (GR)(Nuclear receptor subfamily 3 group C member 1) [Source:UniProtKB/Swiss-Prot;Acc:P04150]	GO:0006355 regulation of transcription, DNA-dependent	GO:0003677 DNA binding,GO:0008270 zinc ion binding,GO:0003700 transcription factor activity,GO:0043565 sequence-specific DNA binding,GO:0005496 steroid binding,GO:0003707 steroid hormone receptor activity,GO:0004879 ligand-dependent nuclear receptor activity,GO:0004883 glucocorticoid receptor activity	GO:0005634 nucleus	166.687	602.542	143.328	524.763	143.328	273.806	1.91035	0.933835			OK	OK
H200001327	H200001327	ENSG00000082996	NM_007282	11342	RNF13	RING finger protein 13 [Source:UniProtKB/Swiss-Prot;Acc:O43567]	-	GO:0005515 protein binding,GO:0008270 zinc ion binding,GO:0046872 metal ion binding	GO:0005634 nucleus,GO:0005737 cytoplasm	159.599	576.473	136.24	498.694	136.24	260.204	1.90989	0.933491			OK	OK
AHsV10000971	AHsV10000971	-	NM_152906.4	128989	C22orf25	Uncharacterized protein C22orf25 [Source:UniProtKB/Swiss-Prot;Acc:Q6ICL3]	-	-	-	153.136	552.592	129.777	474.813	129.777	247.744	1.909	0.932814			OK	OK
opHsV0400002679	opHsV0400002679	ENSG00000184897	NM_006026	8971	H1FX	Histone H1x [Source:UniProtKB/Swiss-Prot;Acc:Q92522]	GO:0006334 nucleosome assembly	GO:0003677 DNA binding	GO:0005634 nucleus,GO:0005694 chromosome,GO:0000786 nucleosome	323.304	1174.34	299.946	1096.56	299.946	572.156	1.90753	0.931707			OK	OK
CHsGV10002070	CHsGV10002070	-	NM_182553.1	254263	CNIH2	Protein cornichon homolog 2 (Cornichon-like protein) [Source:UniProtKB/Swiss-Prot;Acc:Q6PI25]	GO:0008150 biological_process,GO:0007242 intracellular signaling cascade,GO:0006810 transport	GO:0003674 molecular_function	GO:0016021 integral to membrane,GO:0005783 endoplasmic reticulum,GO:0016020 membrane	4230.42	15454.1	4207.06	15376.3	4207.06	8022.92	1.90701	0.931315			OK	OK
AHsV10000509	AHsV10000509	-	NM_152994.3	129285	KLRAQ1	KLRAQ motif-containing protein 1 (Coiled-coil domain-containing protein 128) [Source:UniProtKB/Swiss-Prot;Acc:Q6ZMI0]	-	GO:0005096 GTPase activator activity,GO:0008083 growth factor activity	-	162.554	586.019	139.195	508.24	139.195	265.185	1.90513	0.929889			OK	OK
CHsGV10003213	CHsGV10003213	-	NM_014035.2	28966	SNX24	Sorting nexin-24 [Source:UniProtKB/Swiss-Prot;Acc:Q9Y343]	GO:0007154 cell communication,GO:0015031 protein transport	GO:0005515 protein binding,GO:0035091 phosphoinositide binding	-	203.914	736.914	180.556	659.135	180.556	343.918	1.90477	0.929618			OK	OK
H200003435	H200003435	ENSG00000110048	NM_002556;NM_002556	5007	OSBP	Oxysterol-binding protein 1 [Source:UniProtKB/Swiss-Prot;Acc:P22059]	GO:0006869 lipid transport,GO:0008202 steroid metabolic process	GO:0005179 hormone activity,GO:0008142 oxysterol binding	GO:0016020 membrane,GO:0005576 extracellular region,GO:0005737 cytoplasm,GO:0005794 Golgi apparatus,GO:0000139 Golgi membrane	206.857	747.399	183.498	669.619	183.498	349.388	1.90404	0.929065			OK	OK
H300021648	H300021648	ENSG00000008869	NM_019024;NM_019024	54497	HEATR5B	HEAT repeat-containing protein 5B [Source:UniProtKB/Swiss-Prot;Acc:Q9P2D3]	-	GO:0005488 binding	-	145.799	524.452	122.441	446.673	122.441	233.061	1.90346	0.928626			OK	OK
H300011475	H300011475	ENSG00000114416	NM_001013439;NM_001013439;NM_001013439	8087	FXR1	Fragile X mental retardation syndrome-related protein 1 (hFXR1p) [Source:UniProtKB/Swiss-Prot;Acc:P51114]	GO:0007275 multicellular organismal development,GO:0030154 cell differentiation,GO:0006915 apoptosis,GO:0007519 skeletal muscle development	GO:0003723 RNA binding	GO:0005737 cytoplasm,GO:0005730 nucleolus,GO:0005844 polysome	236.944	856.607	213.585	778.828	213.585	406.37	1.90261	0.927984			OK	OK
H200013266	H200013266	ENSG00000143155	NM_152902;NM_152902	261726	TIPRL	TIP41-like protein (Putative MAPK-activating protein PM10) [Source:UniProtKB/Swiss-Prot;Acc:O75663]	-	GO:0005515 protein binding	-	333.531	1207.9	310.173	1130.12	310.173	589.665	1.90108	0.926823			OK	OK
H200006219	H200006219	ENSG00000141646	NM_005359;NM_005359	4089	SMAD4	Mothers against decapentaplegic homolog 4 (Mothers against DPP homolog 4)(SMAD 4)(hSMAD4)(Deletion target in pancreatic carcinoma 4) [Source:UniProtKB/Swiss-Prot;Acc:Q13485]	GO:0008285 negative regulation of cell proliferation,GO:0006350 transcription,GO:0006355 regulation of transcription, DNA-dependent,GO:0030308 negative regulation of cell growth,GO:0045892 negative regulation of transcription, DNA-dependent,GO:0045944 positive regulation of transcription from RNA polymerase II promoter,GO:0009952 anterior/posterior pattern formation,GO:0007179 transforming growth…	GO:0005515 protein binding,GO:0003700 transcription factor activity,GO:0043565 sequence-specific DNA binding,GO:0042803 protein homodimerization activity,GO:0016563 transcription activator activity,GO:0046332 SMAD binding	GO:0005634 nucleus,GO:0005622 intracellular,GO:0005737 cytoplasm,GO:0005829 cytosol,GO:0005667 transcription factor complex,GO:0005654 nucleoplasm	235.904	851.939	212.546	774.16	212.546	403.934	1.90046	0.926349			OK	OK
H300007882	H300007882	ENSG00000172007	NM_031296	83452	RAB33B	Ras-related protein Rab-33B [Source:UniProtKB/Swiss-Prot;Acc:Q9H082]	GO:0007165 signal transduction,GO:0015031 protein transport,GO:0007264 small GTPase mediated signal transduction,GO:0006886 intracellular protein transport,GO:0006913 nucleocytoplasmic transport	GO:0005515 protein binding,GO:0000166 nucleotide binding,GO:0005525 GTP binding,GO:0003924 GTPase activity	GO:0016020 membrane,GO:0005622 intracellular,GO:0005794 Golgi apparatus,GO:0000139 Golgi membrane	140.326	503.727	116.967	425.947	116.967	222.247	1.90009	0.926064			OK	OK
H200003989	H200003989	ENSG00000166200	NM_004236	9318	COPS2	COP9 signalosome complex subunit 2 (Signalosome subunit 2)(SGN2)(JAB1-containing signalosome subunit 2)(Thyroid receptor-interacting protein 15)(TRIP-15)(Alien homolog) [Source:UniProtKB/Swiss-Prot;Acc:P61201]	GO:0006366 transcription from RNA polymerase II promoter,GO:0007165 signal transduction	GO:0005515 protein binding,GO:0004871 signal transducer activity	GO:0005634 nucleus,GO:0005737 cytoplasm,GO:0008180 signalosome	651.932	2365.43	628.574	2287.65	628.574	1193.63	1.89895	0.925203			OK	OK
H200008675	H200008675	ENSG00000105281	NM_005628	6510	SLC1A5	Neutral amino acid transporter B(0) (ATB(0))(Sodium-dependent neutral amino acid transporter type 2)(RD114/simian type D retrovirus receptor)(Baboon M7 virus receptor)(Solute carrier family 1 member 5) [Source:UniProtKB/Swiss-Prot;Acc:Q15758]	GO:0006810 transport,GO:0006835 dicarboxylic acid transport,GO:0015804 neutral amino acid transport,GO:0006860 extracellular amino acid transport,GO:0006860 extracellular amino acid transport	GO:0005515 protein binding,GO:0004872 receptor activity,GO:0015293 symporter activity,GO:0015175 neutral amino acid transmembrane transporter activity,GO:0017153 sodium:dicarboxylate symporter activity,GO:0015171 amino acid transmembrane transporter activity	GO:0016020 membrane,GO:0005624 membrane fraction,GO:0005887 integral to plasma membrane,GO:0042470 melanosome	1667.06	6059.29	1643.71	5981.51	1643.71	3120.98	1.89875	0.925048			OK	OK
H200003705	H200003705	ENSG00000068028	NM_170714;NM_170714;NM_170714;NM_170714;NM_007182;NM_007182;NM_007182;NM_007182	11186	RASSF1	Ras association domain-containing protein 1 [Source:UniProtKB/Swiss-Prot;Acc:Q9NS23]	GO:0007165 signal transduction	GO:0005515 protein binding	-	140.116	502.572	116.757	424.793	116.757	221.645	1.89834	0.924738			OK	OK
H200004608	H200004608	ENSG00000153339	NM_014939	22878	KIAA1012	Protein TRS85 homolog [Source:UniProtKB/Swiss-Prot;Acc:Q9Y2L5]	GO:0016192 vesicle-mediated transport,GO:0006888 ER to Golgi vesicle-mediated transport	-	GO:0005794 Golgi apparatus,GO:0005801 cis-Golgi network	148.253	532.097	124.894	454.318	124.894	237.05	1.89801	0.924489			OK	OK
H200007609	H200007609	ENSG00000161904	NM_181336;NM_181336	-	LEMD2	LEM domain-containing protein 2 (hLEM2) [Source:UniProtKB/Swiss-Prot;Acc:Q8NC56]	-	-	GO:0005635 nuclear envelope	133.278	477.557	109.919	399.778	109.919	208.593	1.89769	0.924245			OK	OK
AHsV10001510	AHsV10001510	-	NM_002740.5	5584	RP3-514P16.1	protein kinase C, iota (PRKCI), mRNA [Source:RefSeq DNA;Acc:NM_002740]	-	-	-	171.8	617.653	148.442	539.874	148.442	281.691	1.89765	0.924216			OK	OK
AHsV10003460	AHsV10003460	-	NM_005415.3	6574	SLC20A1	Sodium-dependent phosphate transporter 1 (Solute carrier family 20 member 1)(Phosphate transporter 1)(PiT-1)(Gibbon ape leukemia virus receptor 1)(GLVR-1)(Leukemia virus receptor 1 homolog) [Source:UniProtKB/Swiss-Prot;Acc:Q8WUM9]	GO:0006796 phosphate metabolic process,GO:0006810 transport,GO:0006817 phosphate transport,GO:0043123 positive regulation of I-kappaB kinase/NF-kappaB cascade	GO:0004872 receptor activity,GO:0005315 inorganic phosphate transmembrane transporter activity,GO:0005436 sodium:phosphate symporter activity,GO:0015293 symporter activity	GO:0005887 integral to plasma membrane,GO:0016020 membrane	2276.87	8267.03	2253.52	8189.25	2253.52	4272.92	1.89611	0.923044			OK	OK
H300002879	H300002879	ENSG00000170852	NM_015483	25948	KBTBD2	Kelch repeat and BTB domain-containing protein 2 (BTB and kelch domain-containing protein 1) [Source:UniProtKB/Swiss-Prot;Acc:Q8IY47]	-	GO:0005515 protein binding	-	138.522	496.243	115.163	418.464	115.163	218.343	1.89594	0.92291			OK	OK
H200009400	H200009400	ENSG00000119242	NM_025140	80212	CCDC92	Coiled-coil domain-containing protein 92 (Limkain beta-2) [Source:UniProtKB/Swiss-Prot;Acc:Q53HC0]	-	-	-	289.786	1044.98	266.428	967.196	266.428	504.655	1.89416	0.921555			OK	OK
H200001057	H200001057	ENSG00000106052	NM_006024;NM_006024	8887	TAX1BP1	Tax1-binding protein 1 (TRAF6-binding protein) [Source:UniProtKB/Swiss-Prot;Acc:Q86VP1]	GO:0006915 apoptosis,GO:0006916 anti-apoptosis,GO:0006916 anti-apoptosis	GO:0008270 zinc ion binding,GO:0042802 identical protein binding,GO:0005515 protein binding	GO:0005622 intracellular	1851.68	6712.44	1828.32	6634.66	1828.32	3461.78	1.89342	0.920995			OK	OK
CHsGV10001260	CHsGV10001260	-	NM_152407.3	134266	GRPEL2	GrpE protein homolog 2, mitochondrial Precursor (Mt-GrpE#2) [Source:UniProtKB/Swiss-Prot;Acc:Q8TAA5]	GO:0006457 protein folding,GO:0030150 protein import into mitochondrial matrix	GO:0005515 protein binding,GO:0042803 protein homodimerization activity,GO:0051087 chaperone binding,GO:0051082 unfolded protein binding,GO:0000774 adenyl-nucleotide exchange factor activity,GO:0051082 unfolded protein binding	GO:0005739 mitochondrion,GO:0005759 mitochondrial matrix,GO:0005743 mitochondrial inner membrane,GO:0005739 mitochondrion,GO:0005743 mitochondrial inner membrane	152.793	547.234	129.435	469.455	129.435	244.948	1.89244	0.920249			OK	OK
AHsV10001169	AHsV10001169	-	NM_181701.3	169714	QSOX2	Sulfhydryl oxidase 2 Precursor (EC 1.8.3.2)(Quiescin Q6-like protein 1)(Neuroblastoma-derived sulfhydryl oxidase) [Source:UniProtKB/Swiss-Prot;Acc:Q6ZRP7]	GO:0045454 cell redox homeostasis,GO:0055114 oxidation reduction	GO:0016491 oxidoreductase activity,GO:0016972 thiol oxidase activity	GO:0005576 extracellular region,GO:0005634 nucleus,GO:0005886 plasma membrane,GO:0016021 integral to membrane,GO:0031965 nuclear membrane	211.449	759.824	188.091	682.045	188.091	355.872	1.89202	0.919927			OK	OK
H300019777	H300019777	ENSG00000119979	NM_207009	404636	FAM45A	Protein FAM45A [Source:UniProtKB/Swiss-Prot;Acc:Q8TCE6]	-	-	-	557.672	2015.22	534.314	1937.44	534.314	1010.9	1.89196	0.919881			OK	OK
opHsV0400000459	opHsV0400000459	ENSG00000171109	NM_033540	-	MFN1	Mitofusin-1 (EC 3.6.5.-)(Transmembrane GTPase MFN1)(Fzo homolog) [Source:UniProtKB/Swiss-Prot;Acc:Q8IWA4]	GO:0008053 mitochondrial fusion	GO:0005525 GTP binding,GO:0003924 GTPase activity	GO:0016021 integral to membrane,GO:0005741 mitochondrial outer membrane	173.196	621.006	149.838	543.227	149.838	283.441	1.89165	0.919644			OK	OK
AHsV10002560	AHsV10002560	-	NM_000147.3	2517	FUCA1	Tissue alpha-L-fucosidase Precursor (EC 3.2.1.51)(Alpha-L-fucoside fucohydrolase)(Alpha-L-fucosidase I)(Alpha-L-fucosidase 1) [Source:UniProtKB/Swiss-Prot;Acc:P04066]	GO:0005975 carbohydrate metabolic process,GO:0006004 fucose metabolic process,GO:0006027 glycosaminoglycan catabolic process,GO:0008152 metabolic process	GO:0004560 alpha-L-fucosidase activity,GO:0016798 hydrolase activity, acting on glycosyl bonds	GO:0005737 cytoplasm,GO:0005764 lysosome	347.879	1253.72	324.521	1175.94	324.521	613.572	1.8907	0.918921			OK	OK
opHsV0400000542	opHsV0400000542	ENSG00000158669	NM_178819	137964	AGPAT6	1-acyl-sn-glycerol-3-phosphate acyltransferase zeta Precursor (EC 2.3.1.51)(1-AGP acyltransferase 6)(1-AGPAT 6)(Lysophosphatidic acid acyltransferase zeta)(LPAAT-zeta) [Source:UniProtKB/Swiss-Prot;Acc:Q86UL3]	GO:0008152 metabolic process,GO:0006631 fatty acid metabolic process,GO:0008610 lipid biosynthetic process,GO:0002071 glandular epithelial cell maturation,GO:0007595 lactation,GO:0019432 triacylglycerol biosynthetic process,GO:0030879 mammary gland development,GO:0040014 regulation of multicellular organism growth,GO:0046339 diacylglycerol metabolic process	GO:0008415 acyltransferase activity,GO:0016740 transferase activity,GO:0003841 1-acylglycerol-3-phosphate O-acyltransferase activity	GO:0016021 integral to membrane,GO:0016020 membrane,GO:0005783 endoplasmic reticulum	362.199	1304.82	338.84	1227.04	338.84	640.234	1.88949	0.917994			OK	OK
AHsV10000749	AHsV10000749	-	NM_001098511.1	3796	KIF2A	Kinesin-like protein KIF2A (Kinesin-2)(HK2) [Source:UniProtKB/Swiss-Prot;Acc:O00139]	GO:0007018 microtubule-based movement	GO:0003777 microtubule motor activity,GO:0005524 ATP binding	GO:0005875 microtubule associated complex	333.375	1200.23	310.016	1122.45	310.016	585.662	1.88913	0.917724			OK	OK
AHsV10001121	AHsV10001121	-	NM_000874.3	3455	IFNAR2	Interferon-alpha/beta receptor beta chain Precursor (Interferon alpha/beta receptor 2)(IFN-alpha-REC)(Type I interferon receptor)(IFN-R) [Source:UniProtKB/Swiss-Prot;Acc:P48551]	-	-	-	203.094	728.412	179.736	650.633	179.736	339.482	1.88878	0.917455			OK	OK
H200002047	H200002047	ENSG00000131910	NM_021969	8431	NR0B2	Nuclear receptor subfamily 0 group B member 2 (Orphan nuclear receptor SHP)(Small heterodimer partner) [Source:UniProtKB/Swiss-Prot;Acc:Q15466]	GO:0006350 transcription,GO:0006355 regulation of transcription, DNA-dependent,GO:0000122 negative regulation of transcription from RNA polymerase II promoter,GO:0008203 cholesterol metabolic process	GO:0003677 DNA binding,GO:0003700 transcription factor activity,GO:0019904 protein domain specific binding,GO:0003714 transcription corepressor activity,GO:0042803 protein homodimerization activity,GO:0003707 steroid hormone receptor activity,GO:0004879 ligand-dependent nuclear receptor activity	GO:0005634 nucleus	1981	7161.93	1957.64	7084.15	1957.64	3696.31	1.88815	0.916972			OK	OK
H200004121	H200004121	ENSG00000170634	NM_138448	98	ACYP2	Acylphosphatase-2 (EC 3.6.1.7)(Acylphosphate phosphohydrolase 2)(Acylphosphatase, muscle type isozyme) [Source:UniProtKB/Swiss-Prot;Acc:P14621]	GO:0006796 phosphate metabolic process	GO:0016787 hydrolase activity,GO:0003998 acylphosphatase activity	-	214.36	768.72	191.002	690.941	191.002	360.514	1.88749	0.916469			OK	OK
H200002675	H200002675	ENSG00000173821	NM_020914	57674	RNF213	RING finger protein 213 [Source:UniProtKB/Swiss-Prot;Acc:Q63HN8]	-	GO:0005515 protein binding,GO:0008270 zinc ion binding,GO:0000166 nucleotide binding,GO:0046872 metal ion binding,GO:0017111 nucleoside-triphosphatase activity	-	139.542	498.036	116.183	420.257	116.183	219.278	1.88735	0.916361			OK	OK
H300022039	H300022039	ENSG00000115548	NM_018433;NM_018433	55818	JMJD1A	JmjC domain-containing histone demethylation protein 2A (EC 1.14.11.-)(Jumonji domain-containing protein 1A) [Source:UniProtKB/Swiss-Prot;Acc:Q9Y4C1]	GO:0006355 regulation of transcription, DNA-dependent,GO:0016568 chromatin modification,GO:0055114 oxidation reduction,GO:0007242 intracellular signaling cascade,GO:0045941 positive regulation of transcription,GO:0009755 hormone-mediated signaling,GO:0030521 androgen receptor signaling pathway,GO:0033169 histone H3-K9 demethylation,GO:0046293 formaldehyde biosynthetic process	GO:0008270 zinc ion binding,GO:0046872 metal ion binding,GO:0005506 iron ion binding,GO:0016491 oxidoreductase activity,GO:0016702 oxidoreductase activity, acting on single donors with incorporation of molecular oxygen, incorporation of two atoms of oxygen,GO:0050681 androgen receptor binding	GO:0005634 nucleus	553.519	1992.6	530.16	1914.83	530.16	999.101	1.88453	0.914202			OK	OK
H200012075	H200012075	ENSG00000126214	NM_182923;NM_182923;NM_182923;NM_182923;NM_182923;NM_182923	3831	KLC1	Kinesin light chain 1 (KLC 1) [Source:UniProtKB/Swiss-Prot;Acc:Q07866]	-	GO:0003777 microtubule motor activity	GO:0005871 kinesin complex	308.351	1107.01	284.992	1029.23	284.992	537.025	1.88435	0.914065			OK	OK
AHsV10000767	AHsV10000767	-	NM_018061.2	55119	PRPF38B	Pre-mRNA-splicing factor 38B (Sarcoma antigen NY-SAR-27) [Source:UniProtKB/Swiss-Prot;Acc:Q5VTL8]	GO:0006397 mRNA processing,GO:0008380 RNA splicing	-	GO:0005634 nucleus,GO:0005681 spliceosome	303.956	1090.98	280.598	1013.2	280.598	528.66	1.88405	0.913835			OK	OK
CHsGV10000039	CHsGV10000039	-	NM_001024947.2;NM_030799.7	81555	YIPF5	Protein YIPF5 (YIP1 family member 5)(YPT-interacting protein 1 A)(Five-pass transmembrane protein localizing in the Golgi apparatus and the endoplasmic reticulum 5)(Smooth muscle cell-associated protein 5)(SMAP-5) [Source:UniProtKB/Swiss-Prot;Acc:Q969M3]	GO:0015031 protein transport,GO:0016192 vesicle-mediated transport	-	GO:0016021 integral to membrane,GO:0031410 cytoplasmic vesicle,GO:0005783 endoplasmic reticulum,GO:0016020 membrane,GO:0005794 Golgi apparatus,GO:0030134 ER to Golgi transport vesicle	1385.79	4997.09	1362.43	4919.31	1362.43	2566.76	1.88395	0.913763			OK	OK
AHsV10000753	AHsV10000753	-	NM_006755.1	6888	TALDO1	Transaldolase (EC 2.2.1.2) [Source:UniProtKB/Swiss-Prot;Acc:P37837]	GO:0005975 carbohydrate metabolic process,GO:0006098 pentose-phosphate shunt,GO:0008152 metabolic process	GO:0004801 transaldolase activity,GO:0005515 protein binding,GO:0016740 transferase activity	GO:0005737 cytoplasm,GO:0005829 cytosol	2190.77	7899.17	2167.41	7821.39	2167.41	4080.98	1.88288	0.912942			OK	OK
H300019593	H300019593	ENSG00000011295	NM_017775	54902	TTC19	Tetratricopeptide repeat protein 19 (TPR repeat protein 19) [Source:UniProtKB/Swiss-Prot;Acc:Q6DKK2]	-	GO:0005515 protein binding	-	187.61	670.151	164.252	592.371	164.252	309.083	1.88176	0.912082			OK	OK
H200005402	H200005402	ENSG00000134265	-	8774	NAPG	Gamma-soluble NSF attachment protein (SNAP-gamma)(N-ethylmaleimide-sensitive factor attachment protein gamma) [Source:UniProtKB/Swiss-Prot;Acc:Q99747]	GO:0006461 protein complex assembly,GO:0006886 intracellular protein transport,GO:0016192 vesicle-mediated transport,GO:0006944 membrane fusion,GO:0050821 protein stabilization,GO:0006891 intra-Golgi vesicle-mediated transport	GO:0005515 protein binding,GO:0005488 binding	GO:0016020 membrane,GO:0005624 membrane fraction,GO:0005794 Golgi apparatus,GO:0005783 endoplasmic reticulum,GO:0005739 mitochondrion	188.026	671.525	164.667	593.746	164.667	309.8	1.88137	0.911784			OK	OK
CHsGV10002770	CHsGV10002770	-	NM_020307.2	57018	CCNL1	Cyclin-L1 (Cyclin-L) [Source:UniProtKB/Swiss-Prot;Acc:Q9UK58]	GO:0045449 regulation of transcription,GO:0006352 transcription initiation	GO:0030528 transcription regulator activity,GO:0008270 zinc ion binding	GO:0005634 nucleus,GO:0005667 transcription factor complex,GO:0016607 nuclear speck	331.392	1188.2	308.033	1110.42	308.033	579.385	1.88092	0.911438			OK	OK
H300019928	H300019928	ENSG00000109762	NM_031953;NM_031953	-	SNX25	Sorting nexin-25 [Source:UniProtKB/Swiss-Prot;Acc:Q9H3E2]	GO:0007154 cell communication	GO:0005515 protein binding,GO:0035091 phosphoinositide binding	-	165.348	589.613	141.99	511.833	141.99	267.06	1.88084	0.911377			OK	OK
AHsV10002024	AHsV10002024	-	NM_002828.2	5771	PTPN2	Tyrosine-protein phosphatase non-receptor type 2 (EC 3.1.3.48)(T-cell protein-tyrosine phosphatase)(TCPTP) [Source:UniProtKB/Swiss-Prot;Acc:P17706]	GO:0006470 protein amino acid dephosphorylation,GO:0016311 dephosphorylation	GO:0004725 protein tyrosine phosphatase activity,GO:0005515 protein binding,GO:0016787 hydrolase activity,GO:0016791 phosphatase activity,GO:0004726 non-membrane spanning protein tyrosine phosphatase activity	GO:0005737 cytoplasm	352.116	1262.82	328.757	1185.04	328.757	618.322	1.88079	0.911336			OK	OK
AHsV10002883	AHsV10002883	-	NM_175609.1	55738	ARF1GAP	ADP-ribosylation factor GTPase-activating protein 1 (ADP-ribosylation factor 1 GTPase-activating protein)(ARF1 GAP)(ARF1-directed GTPase-activating protein)(GAP protein) [Source:UniProtKB/Swiss-Prot;Acc:Q8N6T3]	GO:0032312 regulation of ARF GTPase activity	GO:0008060 ARF GTPase activator activity,GO:0008270 zinc ion binding	-	136.951	487.129	113.592	409.35	113.592	213.587	1.8803	0.910962			OK	OK
H200006567	H200006567	ENSG00000213792	-	-	AC097359.2	-	-	-	-	1645.25	5918.56	1621.89	5840.78	1621.89	3047.55	1.87901	0.909971			OK	OK
H300019972	H300019972	ENSG00000072803	NM_012300;NM_012300;NM_012300	23291	FBXW11	F-box/WD repeat-containing protein 11 (F-box/WD repeat-containing protein 1B)(F-box and WD repeats protein beta-TrCP2)(Homologous to Slimb protein)(HOS) [Source:UniProtKB/Swiss-Prot;Acc:Q9UKB1]	GO:0006511 ubiquitin-dependent protein catabolic process,GO:0016567 protein ubiquitination,GO:0016055 Wnt receptor signaling pathway	GO:0005515 protein binding,GO:0004842 ubiquitin-protein ligase activity	GO:0005737 cytoplasm,GO:0000151 ubiquitin ligase complex	145.288	516.708	121.93	438.929	121.93	229.02	1.8783	0.909426			OK	OK
H200005353	H200005353	ENSG00000100532	NM_006568	10668	CGRRF1	Cell growth regulator with RING finger domain protein 1 (Cell growth regulatory gene 19 protein)(RING finger protein 197) [Source:UniProtKB/Swiss-Prot;Acc:Q99675]	GO:0006950 response to stress,GO:0008285 negative regulation of cell proliferation,GO:0007049 cell cycle,GO:0030308 negative regulation of cell growth,GO:0007050 cell cycle arrest,GO:0030308 negative regulation of cell growth	GO:0005515 protein binding,GO:0008270 zinc ion binding,GO:0046872 metal ion binding	GO:0005634 nucleus	220.973	789.128	197.615	711.349	197.615	371.162	1.87821	0.909358			OK	OK
AHsV10001004	AHsV10001004	-	NM_001145412.1	4780	NFE2L2	Nuclear factor erythroid 2-related factor 2 (NF-E2-related factor 2)(NFE2-related factor 2)(Nuclear factor, erythroid derived 2, like 2)(HEBP1) [Source:UniProtKB/Swiss-Prot;Acc:Q16236]	GO:0006355 regulation of transcription, DNA-dependent,GO:0045449 regulation of transcription	GO:0003677 DNA binding,GO:0003700 transcription factor activity,GO:0004867 serine-type endopeptidase inhibitor activity,GO:0043565 sequence-specific DNA binding,GO:0046983 protein dimerization activity	GO:0005634 nucleus	1145.57	4115.87	1122.21	4038.09	1122.21	2106.96	1.8775	0.908814			OK	OK
opHsV0400000607	opHsV0400000607	ENSG00000163597	-	-	ALS2CR16	Amyotrophic lateral sclerosis 2 chromosomal region candidate gene 16 protein [Source:UniProtKB/Swiss-Prot;Acc:Q6ZP36]	-	GO:0005488 binding	-	159.199	566.419	135.841	488.64	135.841	254.959	1.87689	0.908346			OK	OK
opHsV0400000994	opHsV0400000994	ENSG00000220565	-	-	RP11-7G12.1	-	-	-	-	2553.24	9174.55	2529.88	9096.77	2529.88	4746.44	1.87615	0.907777			OK	OK
H300018401	H300018401	ENSG00000005893	NM_002294;NM_013995;NM_013995	3920	LAMP2	Lysosome-associated membrane glycoprotein 2 Precursor (LAMP-2)(CD107 antigen-like family member B)(CD107b antigen) [Source:UniProtKB/Swiss-Prot;Acc:P13473]	-	-	GO:0016020 membrane	812.628	2914.27	789.27	2836.49	789.27	1480	1.87515	0.907006			OK	OK
H200006294	H200006294	ENSG00000197081	NM_000876;NM_000876	3482	IGF2R	Cation-independent mannose-6-phosphate receptor Precursor (CI Man-6-P receptor)(CI-MPR)(M6PR)(Insulin-like growth factor 2 receptor)(Insulin-like growth factor II receptor)(IGF-II receptor)(M6P/IGF2 receptor)(M6P/IGF2R)(300 kDa mannose 6-phosphate receptor)(MPR 300)(CD222 antigen) [Source:UniProtKB/Swiss-Prot;Acc:P11717]	GO:0007165 signal transduction,GO:0006810 transport,GO:0006898 receptor-mediated endocytosis	GO:0005515 protein binding,GO:0004872 receptor activity,GO:0005215 transporter activity,GO:0005520 insulin-like growth factor binding,GO:0005537 mannose binding,GO:0001948 glycoprotein binding,GO:0005010 insulin-like growth factor receptor activity	GO:0016021 integral to membrane,GO:0016020 membrane,GO:0005634 nucleus,GO:0005624 membrane fraction,GO:0005641 nuclear envelope lumen,GO:0005737 cytoplasm,GO:0005768 endosome,GO:0005887 integral to plasma membrane,GO:0005765 lysosomal membrane,GO:0030140 trans-Golgi network transport vesicle	878.813	3149.98	855.455	3072.2	855.455	1602.99	1.87384	0.905998			OK	OK
H300015297	H300015297	ENSG00000125149	NM_025187;NM_025187	-	C16orf70	UPF0183 protein C16orf70 [Source:UniProtKB/Swiss-Prot;Acc:Q9BSU1]	-	-	-	329.608	1175.62	306.249	1097.84	306.249	572.821	1.87044	0.903378			OK	OK
H300018988	H300018988	ENSG00000119537	NM_002035;NM_002035	2531	FVT1	3-ketodihydrosphingosine reductase Precursor (KDS reductase)(EC 1.1.1.102)(3-dehydrosphinganine reductase)(Follicular variant translocation protein 1)(FVT-1) [Source:UniProtKB/Swiss-Prot;Acc:Q06136]	GO:0008152 metabolic process,GO:0055114 oxidation reduction,GO:0009239 enterobactin biosynthetic process	GO:0005488 binding,GO:0003824 catalytic activity,GO:0016491 oxidoreductase activity,GO:0047560 3-dehydrosphinganine reductase activity,GO:0008667 2,3-dihydro-2,3-dihydroxybenzoate dehydrogenase activity	GO:0016021 integral to membrane,GO:0016020 membrane,GO:0005783 endoplasmic reticulum,GO:0005789 endoplasmic reticulum membrane,GO:0005615 extracellular space	249.566	888.411	226.207	810.632	226.207	422.965	1.86981	0.902892			OK	OK
H200016614	H200016614	ENSG00000092439	NM_017672	54822	TRPM7	Transient receptor potential cation channel subfamily M member 7 (EC 2.7.11.1)(Long transient receptor potential channel 7)(LTrpC7)(Channel-kinase 1) [Source:UniProtKB/Swiss-Prot;Acc:Q96QT4]	GO:0006811 ion transport,GO:0006468 protein amino acid phosphorylation,GO:0046777 protein amino acid autophosphorylation,GO:0006816 calcium ion transport,GO:0016340 calcium-dependent cell-matrix adhesion,GO:0031032 actomyosin structure organization	GO:0016740 transferase activity,GO:0005509 calcium ion binding,GO:0005515 protein binding,GO:0003779 actin binding,GO:0008270 zinc ion binding,GO:0000166 nucleotide binding,GO:0005524 ATP binding,GO:0016301 kinase activity,GO:0004674 protein serine/threonine kinase activity,GO:0005216 ion channel activity,GO:0017022 myosin binding,GO:0005262 calcium channel activity	GO:0005886 plasma membrane,GO:0016021 integral to membrane,GO:0016020 membrane,GO:0001726 ruffle	165.983	588.559	142.625	510.78	142.625	266.511	1.86861	0.901969			OK	OK
H200006539	H200006539	ENSG00000138279	NM_001156;NM_001156	310	ANXA7	Annexin A7 (Annexin-7)(Annexin VII)(Synexin) [Source:UniProtKB/Swiss-Prot;Acc:P20073]	GO:0007186 G-protein coupled receptor protein signaling pathway,GO:0008283 cell proliferation,GO:0008360 regulation of cell shape,GO:0009651 response to salt stress,GO:0006874 cellular calcium ion homeostasis,GO:0007599 hemostasis,GO:0009992 cellular water homeostasis	GO:0005509 calcium ion binding,GO:0005515 protein binding,GO:0005544 calcium-dependent phospholipid binding	GO:0005886 plasma membrane,GO:0016021 integral to membrane,GO:0005634 nucleus,GO:0005829 cytosol,GO:0005625 soluble fraction,GO:0005635 nuclear envelope,GO:0031982 vesicle,GO:0005626 insoluble fraction	912.31	3260.55	888.951	3182.77	888.951	1660.68	1.86814	0.901599			OK	OK
H200017528	H200017528	ENSG00000010017	NM_005493	10048	RANBP9	Ran-binding protein 9 (RanBP9)(RanBP7)(Ran-binding protein M)(RanBPM)(BPM90)(BPM-L) [Source:UniProtKB/Swiss-Prot;Acc:Q96S59]	GO:0007155 cell adhesion,GO:0006461 protein complex assembly,GO:0007020 microtubule nucleation	GO:0005515 protein binding,GO:0008536 Ran GTPase binding,GO:0005198 structural molecule activity,GO:0005179 hormone activity	GO:0005634 nucleus,GO:0005576 extracellular region,GO:0005737 cytoplasm,GO:0015629 actin cytoskeleton,GO:0005875 microtubule associated complex	272.214	968.632	248.856	890.853	248.856	464.822	1.86784	0.901369			OK	OK
opHsV0400002352	opHsV0400002352	ENSG00000058673	-	9877	ZC3H11A	Zinc finger CCCH domain-containing protein 11A [Source:UniProtKB/Swiss-Prot;Acc:O75152]	-	GO:0008270 zinc ion binding,GO:0046872 metal ion binding,GO:0003676 nucleic acid binding	-	547.323	1952.02	523.964	1874.24	523.964	977.928	1.8664	0.90026			OK	OK
H200002477	H200002477	ENSG00000151779	NM_015909	51594	NAG	Neuroblastoma-amplified gene protein [Source:UniProtKB/Swiss-Prot;Acc:A2RRP1]	GO:0006412 translation	GO:0003735 structural constituent of ribosome	GO:0005622 intracellular,GO:0005840 ribosome	226.195	803.2	202.837	725.421	202.837	378.504	1.86605	0.899991			OK	OK
H200011296	H200011296	ENSG00000134108	NM_018184	55207	ARL8B	ADP-ribosylation factor-like protein 8B (ADP-ribosylation factor-like protein 10C)(Novel small G protein indispensable for equal chromosome segregation 1) [Source:UniProtKB/Swiss-Prot;Acc:Q9NVJ2]	GO:0015031 protein transport,GO:0007186 G-protein coupled receptor protein signaling pathway,GO:0007059 chromosome segregation,GO:0007264 small GTPase mediated signal transduction,GO:0006886 intracellular protein transport	GO:0000166 nucleotide binding,GO:0005525 GTP binding,GO:0003924 GTPase activity,GO:0004871 signal transducer activity,GO:0019003 GDP binding,GO:0043014 alpha-tubulin binding,GO:0048487 beta-tubulin binding,GO:0019001 guanyl nucleotide binding	GO:0016020 membrane,GO:0005622 intracellular,GO:0005737 cytoplasm,GO:0005768 endosome,GO:0030496 midbody,GO:0005765 lysosomal membrane,GO:0031902 late endosome membrane,GO:0051233 spindle midzone	458.307	1632.77	434.949	1554.99	434.949	811.347	1.86539	0.899475			OK	OK
AHsV10003388	AHsV10003388	-	NM_001039717.1	80167	C4orf29	Uncharacterized protein C4orf29 Precursor [Source:UniProtKB/Swiss-Prot;Acc:Q0P651]	-	-	GO:0005576 extracellular region	227.084	805.957	203.726	728.178	203.726	379.943	1.86497	0.899155			OK	OK
H200004931	H200004931	ENSG00000092020	NM_017917	55012	C14orf10	Serine/threonine-protein phosphatase 2A regulatory subunit B'' subunit gamma (Protein phosphatase subunit G5PR)(Rhabdomyosarcoma antigen MU-RMS-40.6A)(Rhabdomyosarcoma antigen Mu-RMS-40.6C) [Source:UniProtKB/Swiss-Prot;Acc:Q969Q6]	-	GO:0005509 calcium ion binding	GO:0005634 nucleus,GO:0005737 cytoplasm	125.135	441.418	101.777	363.639	101.777	189.737	1.86424	0.898591			OK	OK
H300016001	H300016001	ENSG00000109971	NM_006597	3312	HSPA8	Heat shock cognate 71 kDa protein (Heat shock 70 kDa protein 8) [Source:UniProtKB/Swiss-Prot;Acc:P11142]	GO:0006950 response to stress,GO:0006457 protein folding,GO:0006986 response to unfolded protein	GO:0005515 protein binding,GO:0000166 nucleotide binding,GO:0005524 ATP binding,GO:0042623 ATPase activity, coupled	GO:0005622 intracellular,GO:0005737 cytoplasm,GO:0009986 cell surface,GO:0042470 melanosome	9523.69	34016	9500.33	33938.2	9500.33	17708	1.86393	0.898352			OK	OK
H300021097	H300021097	ENSG00000197217	NM_004901;NM_004901	-	ENTPD4	Ectonucleoside triphosphate diphosphohydrolase 4 (NTPDase 4)(EC 3.6.1.6)(Uridine-diphosphatase)(UDPase)(Lysosomal apyrase-like protein of 70 kDa) [Source:UniProtKB/Swiss-Prot;Acc:Q9Y227]	-	GO:0016787 hydrolase activity	-	150.457	531.546	127.098	453.767	127.098	236.763	1.86284	0.897501			OK	OK
AHsV10002538	AHsV10002538	-	NM_053005.3	81532	AC091196.6	Mps one binder kinase activator-like 2 (Mob2 homolog)(HCCA2) [Source:UniProtKB/Swiss-Prot;Acc:Q70IA6]	-	GO:0005515 protein binding	-	144.95	511.775	121.591	433.996	121.591	226.447	1.86236	0.897133			OK	OK
H300013772	H300013772	ENSG00000198064	-	100132247	AC106788.3	NPIP-like protein KIAA0220 (Protein pps22-1) [Source:UniProtKB/Swiss-Prot;Acc:Q92617]	GO:0008150 biological_process	GO:0003674 molecular_function	GO:0016021 integral to membrane,GO:0016020 membrane,GO:0005575 cellular_component	1523.6	5431.32	1500.24	5353.54	1500.24	2793.32	1.86192	0.89679			OK	OK
CHsGV10003128	CHsGV10003128	-	NM_001144868.1;NM_001039577.2;NM_030937.4;NM_001144867.1	81669	CCNL2	Cyclin-L2 (Paneth cell-enhanced expression protein) [Source:UniProtKB/Swiss-Prot;Acc:Q96S94]	GO:0045449 regulation of transcription,GO:0006352 transcription initiation,GO:0042309 homoiothermy,GO:0050826 response to freezing	GO:0003677 DNA binding,GO:0030528 transcription regulator activity,GO:0008270 zinc ion binding,GO:0050825 ice binding	GO:0005634 nucleus,GO:0000785 chromatin,GO:0005667 transcription factor complex,GO:0016607 nuclear speck	623.34	2217.52	599.981	2139.74	599.981	1116.46	1.86082	0.895937			OK	OK
AHsV10000586	AHsV10000586	-	NM_017872.3	54974	THG1L	Probable tRNA(His) guanylyltransferase (EC 2.7.7.-)(tRNA-histidine guanylyltransferase)(Interphase cytoplasmic foci protein 45) [Source:UniProtKB/Swiss-Prot;Acc:Q9NWX6]	GO:0006400 tRNA modification	GO:0003677 DNA binding,GO:0008193 tRNA guanylyltransferase activity,GO:0016740 transferase activity,GO:0016779 nucleotidyltransferase activity	GO:0005737 cytoplasm,GO:0005739 mitochondrion	453.08	1609.89	429.721	1532.11	429.721	799.413	1.86031	0.89554			OK	OK
H200007519	H200007519	ENSG00000059145	NM_001037125;NM_001037125;NM_001037125;NM_001037125;NM_001037125;NM_001037125	64718	C16orf28	RING finger protein unkempt-like [Source:UniProtKB/Swiss-Prot;Acc:Q9H9P5]	-	GO:0005515 protein binding,GO:0008270 zinc ion binding,GO:0046872 metal ion binding	-	255.197	904.254	231.839	826.475	231.839	431.231	1.86005	0.89534			OK	OK
H200004185	H200004185	ENSG00000168564	NM_017632	55602	CDKN2AIP	CDKN2A-interacting protein (Collaborator of ARF) [Source:UniProtKB/Swiss-Prot;Acc:Q9NXV6]	-	GO:0003725 double-stranded RNA binding	GO:0005634 nucleus,GO:0005622 intracellular	141.613	499.216	118.255	421.437	118.255	219.894	1.85949	0.89491			OK	OK
opHsV0400000084	opHsV0400000084	ENSG00000107290	NM_015046;NM_015046	-	SETX	Probable helicase senataxin (EC 3.6.1.-)(SEN1 homolog)(Amyotrophic lateral sclerosis 4 protein) [Source:UniProtKB/Swiss-Prot;Acc:Q7Z333]	-	GO:0000166 nucleotide binding,GO:0017111 nucleoside-triphosphatase activity,GO:0004386 helicase activity	-	140.511	495.042	117.152	417.263	117.152	217.716	1.85841	0.894065			OK	OK
H200001348	H200001348	ENSG00000124357	NM_017567	55577	NAGK	N-acetyl-D-glucosamine kinase (N-acetylglucosamine kinase)(EC 2.7.1.59)(GlcNAc kinase) [Source:UniProtKB/Swiss-Prot;Acc:Q9UJ70]	GO:0006044 N-acetylglucosamine metabolic process,GO:0006051 N-acetylmannosamine metabolic process	GO:0016740 transferase activity,GO:0005515 protein binding,GO:0000166 nucleotide binding,GO:0005524 ATP binding,GO:0016301 kinase activity,GO:0045127 N-acetylglucosamine kinase activity	-	379.995	1347.36	356.636	1269.58	356.636	662.431	1.85744	0.893318			OK	OK
H200014224	H200014224	ENSG00000060339	NM_018237	55749	CCAR1	Cell division cycle and apoptosis regulator protein 1 (Cell cycle and apoptosis regulatory protein 1)(CARP-1)(Death inducer with SAP domain) [Source:UniProtKB/Swiss-Prot;Acc:Q8IX12]	GO:0007049 cell cycle,GO:0006915 apoptosis,GO:0000398 nuclear mRNA splicing, via spliceosome,GO:0042309 homoiothermy,GO:0050826 response to freezing	GO:0003676 nucleic acid binding,GO:0050825 ice binding	GO:0005634 nucleus,GO:0005737 cytoplasm,GO:0005794 Golgi apparatus	175.577	619.576	152.218	541.797	152.218	282.694	1.85716	0.8931			OK	OK
H300022358	H300022358	ENSG00000142794	NM_032264;NM_032264	100133459	NBPF3	Neuroblastoma breakpoint family member 3 (Protein AE2)(Protein SHIIIa4) [Source:UniProtKB/Swiss-Prot;Acc:Q9H094]	-	-	-	271.687	960.7	248.329	882.921	248.329	460.683	1.85513	0.891523			OK	OK
H300015049	H300015049	ENSG00000132823	NM_016470	51526	C20orf111	Uncharacterized protein C20orf111 [Source:UniProtKB/Swiss-Prot;Acc:Q9NX31]	-	-	-	511.497	1813.02	488.139	1735.24	488.139	905.399	1.8548	0.891263			OK	OK
opHsV0400000088	opHsV0400000088	ENSG00000108443	NM_003161	6198	RPS6KB1	Ribosomal protein S6 kinase beta-1 (EC 2.7.11.1)(Ribosomal protein S6 kinase I)(S6K1)(S6K)(70 kDa ribosomal protein S6 kinase 1)(p70 S6 kinase alpha)(p70(S6K)-alpha)(p70-S6K)(P70S6K)(p70-alpha) [Source:UniProtKB/Swiss-Prot;Acc:P23443]	GO:0007165 signal transduction,GO:0006468 protein amino acid phosphorylation	GO:0016740 transferase activity,GO:0000166 nucleotide binding,GO:0005524 ATP binding,GO:0004674 protein serine/threonine kinase activity,GO:0004713 protein tyrosine kinase activity,GO:0004672 protein kinase activity	GO:0005840 ribosome,GO:0005737 cytoplasm,GO:0005829 cytosol,GO:0030054 cell junction,GO:0045202 synapse,GO:0019717 synaptosome	184.309	649.426	160.951	571.647	160.951	298.269	1.85317	0.889994			OK	OK
AHsV10001880	AHsV10001880	-	NM_012212.2	22949	PTGR1	Prostaglandin reductase 1 (PRG-1)(EC 1.3.1.-)(NADP-dependent leukotriene B4 12-hydroxydehydrogenase)(EC 1.3.1.74)(15-oxoprostaglandin 13-reductase)(EC 1.3.1.48) [Source:UniProtKB/Swiss-Prot;Acc:Q14914]	GO:0006691 leukotriene metabolic process,GO:0008152 metabolic process,GO:0055114 oxidation reduction	GO:0003824 catalytic activity,GO:0004022 alcohol dehydrogenase activity,GO:0005488 binding,GO:0008270 zinc ion binding,GO:0016491 oxidoreductase activity,GO:0032440 2-alkenal reductase activity,GO:0047522 15-oxoprostaglandin 13-oxidase activity	GO:0005737 cytoplasm	407.304	1441.12	383.945	1363.34	383.945	711.353	1.85275	0.889665			OK	OK
H200001946	H200001946	ENSG00000141504	NM_133491;NM_133491;NM_133491	-	SAT2	Diamine acetyltransferase 2 (EC 2.3.1.57)(Spermidine/spermine N(1)-acetyltransferase 2)(Polyamine N-acetyltransferase 2)(Thialysine N-epsilon-acetyltransferase) [Source:UniProtKB/Swiss-Prot;Acc:Q96F10]	GO:0008152 metabolic process	GO:0008080 N-acetyltransferase activity	-	1147.85	4068.18	1124.49	3990.4	1124.49	2082.08	1.85157	0.888748			OK	OK
H300020153	H300020153	ENSG00000141027	NM_006311;NM_006311;NM_006311;NM_006311	-	NCOR1	Nuclear receptor corepressor 1 (N-CoR1)(N-CoR) [Source:UniProtKB/Swiss-Prot;Acc:O75376]	GO:0045892 negative regulation of transcription, DNA-dependent	GO:0003677 DNA binding,GO:0003700 transcription factor activity,GO:0043565 sequence-specific DNA binding,GO:0016564 transcription repressor activity	-	502.501	1775.97	479.143	1698.19	479.143	886.067	1.84928	0.88696			OK	OK
H300004170	H300004170	ENSG00000044090	NM_014780	9820	CUL7	Cullin-7 (CUL-7) [Source:UniProtKB/Swiss-Prot;Acc:Q14999]	GO:0006511 ubiquitin-dependent protein catabolic process,GO:0006508 proteolysis,GO:0001570 vasculogenesis,GO:0030071 regulation of mitotic metaphase/anaphase transition	GO:0005515 protein binding,GO:0005488 binding,GO:0031625 ubiquitin protein ligase binding	GO:0005737 cytoplasm,GO:0031461 cullin-RING ubiquitin ligase complex,GO:0005680 anaphase-promoting complex	202.043	710.404	178.685	632.625	178.685	330.086	1.84731	0.885427			OK	OK
H200011663	H200011663	ENSG00000055208	NM_015093	23118	MAP3K7IP2	Mitogen-activated protein kinase kinase kinase 7-interacting protein 2 (TAK1-binding protein 2) [Source:UniProtKB/Swiss-Prot;Acc:Q9NYJ8]	GO:0043123 positive regulation of I-kappaB kinase/NF-kappaB cascade	GO:0005515 protein binding,GO:0008270 zinc ion binding,GO:0046872 metal ion binding	GO:0016020 membrane,GO:0005622 intracellular,GO:0005737 cytoplasm,GO:0005829 cytosol	303.153	1068.09	279.794	990.309	279.794	516.715	1.84677	0.885003			OK	OK
H300019391	H300019391	ENSG00000135090	NM_016281	-	TAOK3	Serine/threonine-protein kinase TAO3 (EC 2.7.11.1)(Thousand and one amino acid protein 3)(Jun kinase-inhibitory kinase)(JNK/SAPK-inhibitory kinase)(Dendritic cell-derived protein kinase)(Cutaneous T-cell lymphoma tumor antigen HD-CL-09)(CTCL tumor antigen HD-CL-09)(Kinase from chicken homolog A)(hKFC-A) [Source:UniProtKB/Swiss-Prot;Acc:Q9H2K8]	-	-	-	139.231	487.71	115.873	409.931	115.873	213.89	1.84591	0.884331			OK	OK
H200005031	H200005031	ENSG00000120889	NM_147187;NM_147187	8795	TNFRSF10B	Tumor necrosis factor receptor superfamily member 10B Precursor (Death receptor 5)(TNF-related apoptosis-inducing ligand receptor 2)(TRAIL receptor 2)(TRAIL-R2)(CD262 antigen) [Source:UniProtKB/Swiss-Prot;Acc:O14763]	GO:0007165 signal transduction,GO:0006955 immune response,GO:0006915 apoptosis	GO:0005515 protein binding,GO:0004872 receptor activity,GO:0004888 transmembrane receptor activity	GO:0016020 membrane	864.372	3050.37	841.013	2972.59	841.013	1551.01	1.84422	0.883011			OK	OK
H300019500	H300019500	ENSG00000137831	NM_018003;NM_018003;NM_018003	55075	UACA	Uveal autoantigen with coiled-coil domains and ankyrin repeats [Source:UniProtKB/Swiss-Prot;Acc:Q9BZF9]	GO:0016032 viral reproduction	-	-	124.495	435.242	101.137	357.463	101.137	186.514	1.84417	0.882975			OK	OK
DHsGV10005373	DHsGV10005373	-	-	728622	LOC728622	-	-	-	-	164.976	577.855	141.617	500.076	141.617	260.926	1.84247	0.88164			OK	OK
H200001063	H200001063	ENSG00000112983	NM_006696;NM_006696;NM_006696;NM_006696	-	BRD8	Bromodomain-containing protein 8 (p120)(Skeletal muscle abundant protein 2)(Skeletal muscle abundant protein)(Thyroid hormone receptor coactivating protein 120kDa)(TrCP120) [Source:UniProtKB/Swiss-Prot;Acc:Q9H0E9]	-	GO:0016787 hydrolase activity,GO:0046983 protein dimerization activity	-	650.998	2292.94	627.639	2215.16	627.639	1155.81	1.84152	0.880894			OK	OK
H200003180	H200003180	ENSG00000153922	NM_001270	1105	CHD1	Chromodomain-helicase-DNA-binding protein 1 (CHD-1)(EC 3.6.1.-)(ATP-dependent helicase CHD1) [Source:UniProtKB/Swiss-Prot;Acc:O14646]	GO:0006357 regulation of transcription from RNA polymerase II promoter,GO:0006338 chromatin remodeling,GO:0006333 chromatin assembly or disassembly	GO:0003677 DNA binding,GO:0016787 hydrolase activity,GO:0000166 nucleotide binding,GO:0005524 ATP binding,GO:0003676 nucleic acid binding,GO:0004386 helicase activity,GO:0003682 chromatin binding,GO:0004003 ATP-dependent DNA helicase activity	GO:0005634 nucleus,GO:0000785 chromatin	181.615	636.223	158.257	558.444	158.257	291.38	1.84118	0.880634			OK	OK
H300008660	H300008660	ENSG00000180209	NM_013292	29895	AC127457.2	Myosin regulatory light chain 2, skeletal muscle isoform (Fast skeletal myosin light chain 2)(MLC2B) [Source:UniProtKB/Swiss-Prot;Acc:Q96A32]	GO:0007519 skeletal muscle development	GO:0005509 calcium ion binding,GO:0003774 motor activity,GO:0008307 structural constituent of muscle	GO:0016459 myosin complex,GO:0005859 muscle myosin complex	316.449	1111.4	293.09	1033.63	293.09	539.316	1.8401	0.879787			OK	OK
H300002225	H300002225	ENSG00000181852	NM_005785;NM_005785;NM_005785	10193	RNF41	E3 ubiquitin-protein ligase NRDP1 (EC 6.3.2.-)(RING finger protein 41) [Source:UniProtKB/Swiss-Prot;Acc:Q9H4P4]	GO:0006511 ubiquitin-dependent protein catabolic process,GO:0016567 protein ubiquitination	GO:0005515 protein binding,GO:0008270 zinc ion binding,GO:0046872 metal ion binding,GO:0016874 ligase activity,GO:0004842 ubiquitin-protein ligase activity,GO:0016881 acid-amino acid ligase activity,GO:0031386 protein tag	GO:0000151 ubiquitin ligase complex	146.939	513.575	123.58	435.796	123.58	227.386	1.83999	0.879695			OK	OK
AHsV10003098	AHsV10003098	-	NM_003618.2	8491	MAP4K3	Mitogen-activated protein kinase kinase kinase kinase 3 (EC 2.7.11.1)(MAPK/ERK kinase kinase kinase 3)(MEK kinase kinase 3)(MEKKK 3)(Germinal center kinase-related protein kinase)(GLK) [Source:UniProtKB/Swiss-Prot;Acc:Q8IVH8]	GO:0006468 protein amino acid phosphorylation,GO:0006950 response to stress,GO:0007243 protein kinase cascade,GO:0007254 JNK cascade	GO:0000166 nucleotide binding,GO:0004672 protein kinase activity,GO:0004674 protein serine/threonine kinase activity,GO:0004713 protein tyrosine kinase activity,GO:0005083 small GTPase regulator activity,GO:0005515 protein binding,GO:0005524 ATP binding,G	-	216.334	757.9	192.976	680.121	192.976	354.868	1.83892	0.878861			OK	OK
H200018866	H200018866	ENSG00000175309	NM_153373	-	AGXT2L2	Alanine--glyoxylate aminotransferase 2-like 2 (EC 2.6.1.-) [Source:UniProtKB/Swiss-Prot;Acc:Q8IUZ5]	-	GO:0030170 pyridoxal phosphate binding,GO:0008483 transaminase activity	-	173.824	607.319	150.466	529.54	150.466	276.299	1.83629	0.876793			OK	OK
CHsGV10002238	CHsGV10002238	-	NM_005089.3	8233	ZRSR2	U2 small nuclear ribonucleoprotein auxiliary factor 35 kDa subunit-related protein 2 (U2(RNU2) small nuclear RNA auxiliary factor 1-like 2)(CCCH type zinc finger, RNA-binding motif and serine/arginine rich protein 2)(Renal carcinoma antigen NY-REN-20) [Source:UniProtKB/Swiss-Prot;Acc:Q15696]	GO:0008380 RNA splicing	GO:0003723 RNA binding,GO:0008270 zinc ion binding,GO:0000166 nucleotide binding,GO:0003676 nucleic acid binding,GO:0046872 metal ion binding	GO:0005634 nucleus,GO:0030529 ribonucleoprotein complex,GO:0005689 U12-dependent spliceosome	158.188	552.277	134.829	474.498	134.829	247.579	1.83624	0.876758			OK	OK
H300019809	H300019809	ENSG00000011243	-	26993	AKAP8L	A-kinase anchor protein 8-like (AKAP8-like protein)(Neighbor of A-kinase-anchoring protein 95)(Neighbor of AKAP95)(Homologous to AKAP95 protein)(HA95)(Helicase A-binding protein 95)(HAP95) [Source:UniProtKB/Swiss-Prot;Acc:Q9ULX6]	GO:0007155 cell adhesion,GO:0008150 biological_process	GO:0003677 DNA binding,GO:0005515 protein binding,GO:0008270 zinc ion binding,GO:0046872 metal ion binding,GO:0003676 nucleic acid binding,GO:0005198 structural molecule activity,GO:0016301 kinase activity,GO:0017151 DEAD/H-box RNA helicase binding	GO:0005634 nucleus,GO:0005622 intracellular,GO:0005737 cytoplasm,GO:0015629 actin cytoskeleton,GO:0005694 chromosome,GO:0016363 nuclear matrix	143.95	502.118	120.592	424.339	120.592	221.408	1.83602	0.87658			OK	OK
H300011296	H300011296	ENSG00000152926	NM_015852;NM_015852	-	ZNF117	Zinc finger protein 117 (Zinc finger protein HPF9)(Provirus-linked krueppel)(h-PLK) [Source:UniProtKB/Swiss-Prot;Acc:Q03924]	GO:0006350 transcription,GO:0006355 regulation of transcription, DNA-dependent,GO:0008150 biological_process	GO:0008270 zinc ion binding,GO:0046872 metal ion binding,GO:0003700 transcription factor activity,GO:0003676 nucleic acid binding,GO:0003674 molecular_function	GO:0005634 nucleus,GO:0005622 intracellular	596.578	2094.83	573.219	2017.05	573.219	1052.44	1.83601	0.876577			OK	OK
H200012180	H200012180	ENSG00000088854	NM_001009984	25943	C20orf194	Uncharacterized protein C20orf194 [Source:UniProtKB/Swiss-Prot;Acc:Q5TEA3]	-	GO:0008270 zinc ion binding	GO:0005622 intracellular	168.728	589.292	145.37	511.513	145.37	266.893	1.83596	0.876534			OK	OK
H200010662	H200010662	ENSG00000198933	-	-	TBKBP1	TANK-binding kinase 1-binding protein (TBK1-binding protein 1) [Source:UniProtKB/Swiss-Prot;Acc:A7MCY6]	-	-	-	136.389	475.433	113.03	397.654	113.03	207.485	1.83566	0.876296			OK	OK
AHsV10001535	AHsV10001535	-	NM_016265.3	7559	ZNF12	Zinc finger protein 12 (Zinc finger protein KOX3)(Zinc finger protein 325)(Gonadotropin-inducible transcription repressor 3)(GIOT-3) [Source:UniProtKB/Swiss-Prot;Acc:P17014]	GO:0006355 regulation of transcription, DNA-dependent	GO:0003676 nucleic acid binding,GO:0008270 zinc ion binding	GO:0005622 intracellular	182.98	639.244	159.621	561.465	159.621	292.957	1.83532	0.876034			OK	OK
H200013408	H200013408	ENSG00000173905	NM_014498	27333	GOLIM4	Golgi integral membrane protein 4 (Golgi phosphoprotein 4)(Golgi integral membrane protein, cis)(GIMPc)(Golgi-localized phosphoprotein of 130 kDa)(Golgi phosphoprotein of 130 kDa) [Source:UniProtKB/Swiss-Prot;Acc:O00461]	GO:0006810 transport	-	GO:0016021 integral to membrane,GO:0016020 membrane,GO:0005634 nucleus,GO:0005768 endosome,GO:0005794 Golgi apparatus,GO:0005796 Golgi lumen,GO:0010008 endosome membrane,GO:0030139 endocytic vesicle,GO:0005801 cis-Golgi network	156.611	546.146	133.252	468.367	133.252	244.38	1.83397	0.874968			OK	OK
H200003027	H200003027	ENSG00000086544	NM_025194	80271	ITPKC	Inositol-trisphosphate 3-kinase C (EC 2.7.1.127)(Inositol 1,4,5-trisphosphate 3-kinase C)(InsP 3-kinase C)(IP3K-C) [Source:UniProtKB/Swiss-Prot;Acc:Q96DU7]	-	GO:0016740 transferase activity,GO:0000166 nucleotide binding,GO:0005524 ATP binding,GO:0016301 kinase activity,GO:0005516 calmodulin binding,GO:0008440 inositol trisphosphate 3-kinase activity	GO:0005634 nucleus,GO:0005737 cytoplasm	148.696	518.295	125.338	440.516	125.338	229.849	1.83384	0.874865			OK	OK
H200017431	H200017431	ENSG00000075975	NM_014160	23609	MKRN2	Makorin-2 (RING finger protein 62) [Source:UniProtKB/Swiss-Prot;Acc:Q9H000]	GO:0008150 biological_process	GO:0005515 protein binding,GO:0008270 zinc ion binding,GO:0046872 metal ion binding,GO:0003676 nucleic acid binding,GO:0003674 molecular_function	GO:0005622 intracellular	130.287	453.186	106.928	375.407	106.928	195.877	1.83185	0.873303			OK	OK
H300019568	H300019568	ENSG00000109790	NM_015990;NM_015990;NM_015990;NM_015990	-	KLHL5	Kelch-like protein 5 [Source:UniProtKB/Swiss-Prot;Acc:Q96PQ7]	-	GO:0005515 protein binding	-	253.06	884.215	229.702	806.436	229.702	420.776	1.83184	0.87329			OK	OK
CHsGV10002232	CHsGV10002232	-	NM_152523.2;NR_024523.1;NM_001142300.1	151195	CCNYL1	Cyclin-Y-like protein 1 [Source:UniProtKB/Swiss-Prot;Acc:Q8N7R7]	-	-	-	198.893	693.494	175.534	615.715	175.534	321.262	1.8302	0.872001			OK	OK
H200015434	H200015434	ENSG00000132471	NM_012478	23558	WBP2	WW domain-binding protein 2 (WBP-2) [Source:UniProtKB/Swiss-Prot;Acc:Q969T9]	GO:0008150 biological_process	GO:0005515 protein binding,GO:0005515 protein binding	GO:0005575 cellular_component	302.794	1057.91	279.435	980.133	279.435	511.406	1.83014	0.871953			OK	OK
opHsV0400003766	opHsV0400003766	ENSG00000166130	NM_201613;NM_153687	121457	AC013283.23	Inhibitor of nuclear factor kappa-B kinase-interacting protein (I kappa-B kinase interacting protein)(IKK-interacting protein) [Source:UniProtKB/Swiss-Prot;Acc:Q70UQ0]	-	-	GO:0016021 integral to membrane,GO:0016020 membrane,GO:0005783 endoplasmic reticulum,GO:0005789 endoplasmic reticulum membrane	258.796	903.228	235.438	825.449	235.438	430.696	1.82934	0.871323			OK	OK
CHsGV10001485	CHsGV10001485	-	NM_139126.2	85313	PPIL4	Peptidyl-prolyl cis-trans isomerase-like 4 (PPIase)(Rotamase)(EC 5.2.1.8)(Cyclophilin-like protein PPIL4) [Source:UniProtKB/Swiss-Prot;Acc:Q8WUA2]	GO:0006457 protein folding	GO:0003723 RNA binding,GO:0000166 nucleotide binding,GO:0003676 nucleic acid binding,GO:0003755 peptidyl-prolyl cis-trans isomerase activity,GO:0016853 isomerase activity	GO:0005634 nucleus	270.357	942.856	246.999	865.077	246.999	451.373	1.82743	0.869814			OK	OK
AHsV10003331	AHsV10003331	-	NM_004330.2	663	BNIP2	BCL2/adenovirus E1B 19 kDa protein-interacting protein 2 [Source:UniProtKB/Swiss-Prot;Acc:Q12982]	GO:0006915 apoptosis,GO:0006916 anti-apoptosis	GO:0005096 GTPase activator activity,GO:0005509 calcium ion binding,GO:0005515 protein binding	GO:0005635 nuclear envelope,GO:0005737 cytoplasm,GO:0043231 intracellular membrane-bounded organelle	502.87	1757.07	479.512	1679.29	479.512	876.204	1.82729	0.869702			OK	OK
H200019677	H200019677	ENSG00000163322	NM_139076;NM_139076	-	FAM175A	Protein FAM175A (Coiled-coil domain-containing protein 98) [Source:UniProtKB/Swiss-Prot;Acc:Q6UWZ7]	-	-	-	126.176	437.844	102.818	360.065	102.818	187.872	1.82723	0.869656			OK	OK
CHsGV10003235	CHsGV10003235	-	NM_153006.2	162417	NAGS	N-acetylglutamate synthase, mitochondrial Precursor (EC 2.3.1.1)(Amino-acid acetyltransferase) [Contains N-acetylglutamate synthase long form;N-acetylglutamate synthase short form;N-acetylglutamate synthase conserved domain form] [Source:UniProtKB/Swiss-Prot;Acc:Q8N159]	GO:0006536 glutamate metabolic process,GO:0000050 urea cycle,GO:0008152 metabolic process,GO:0006526 arginine biosynthetic process,GO:0008652 cellular amino acid biosynthetic process,GO:0006536 glutamate metabolic process	GO:0008080 N-acetyltransferase activity,GO:0016740 transferase activity,GO:0008415 acyltransferase activity,GO:0003991 acetylglutamate kinase activity,GO:0004042 amino-acid N-acetyltransferase activity,GO:0004042 amino-acid N-acetyltransferase activity	GO:0005739 mitochondrion,GO:0005759 mitochondrial matrix	174.642	607.441	151.284	529.662	151.284	276.363	1.82679	0.869307			OK	OK
AHsV10003303	AHsV10003303	-	NM_014949.2	22889	KIAA0907	UPF0469 protein KIAA0907 [Source:UniProtKB/Swiss-Prot;Acc:Q7Z7F0]	-	-	GO:0005634 nucleus	535.647	1870.8	512.289	1793.02	512.289	935.545	1.82621	0.86885			OK	OK
H300019136	H300019136	ENSG00000127328	NM_022456;NM_175623;NM_175623;NM_175623;NM_175623;NM_175623	117177	RAB3IP	RAB3A-interacting protein (Rabin-3)(SSX2-interacting protein) [Source:UniProtKB/Swiss-Prot;Acc:Q96QF0]	GO:0015031 protein transport	GO:0005515 protein binding,GO:0005085 guanyl-nucleotide exchange factor activity	GO:0005634 nucleus,GO:0005737 cytoplasm,GO:0005829 cytosol	213.02	741.397	189.661	663.618	189.661	346.257	1.82566	0.868419			OK	OK
opHsV0400004402	opHsV0400004402	ENSG00000148572	NM_030759;NM_030759	-	NRBF2	Nuclear receptor-binding factor 2 (NRBF-2)(Comodulator of PPAR and RXR) [Source:UniProtKB/Swiss-Prot;Acc:Q96F24]	GO:0006355 regulation of transcription, DNA-dependent	GO:0003700 transcription factor activity,GO:0043565 sequence-specific DNA binding,GO:0046983 protein dimerization activity	GO:0005634 nucleus	203.123	706.683	179.765	628.904	179.765	328.144	1.82541	0.868221			OK	OK
H300004526	H300004526	ENSG00000151835	NM_014363;NM_014363	26278	SACS	Sacsin [Source:UniProtKB/Swiss-Prot;Acc:Q9NZJ4]	GO:0006457 protein folding,GO:0006464 protein modification process	GO:0005524 ATP binding,GO:0003674 molecular_function,GO:0031072 heat shock protein binding	GO:0005575 cellular_component	123.404	427.372	100.046	349.593	100.046	182.408	1.82324	0.866507			OK	OK
opHsV0400005812	opHsV0400005812	ENSG00000218245	-	-	RP5-924G13.2	-	-	-	-	2592.54	9053.81	2569.18	8976.03	2569.18	4683.44	1.82293	0.866258			OK	OK
H200001089	H200001089	ENSG00000138032	NM_177969	5495	PPM1B	Protein phosphatase 1B (EC 3.1.3.16)(Protein phosphatase 2C isoform beta)(PP2C-beta) [Source:UniProtKB/Swiss-Prot;Acc:O75688]	GO:0006470 protein amino acid dephosphorylation	GO:0000287 magnesium ion binding,GO:0030145 manganese ion binding,GO:0003824 catalytic activity,GO:0004722 protein serine/threonine phosphatase activity,GO:0004721 phosphoprotein phosphatase activity	GO:0008287 protein serine/threonine phosphatase complex	374.703	1304.65	351.345	1226.87	351.345	640.147	1.82199	0.865516			OK	OK
H300002040	H300002040	ENSG00000183055	-	728153	FAM133B	Protein FAM133B [Source:UniProtKB/Swiss-Prot;Acc:Q5BKY9]	-	GO:0003677 DNA binding	GO:0005634 nucleus	259.37	901.632	236.012	823.853	236.012	429.863	1.82136	0.865018			OK	OK
AHsV10002109	AHsV10002109	-	NM_001031689.2	9373	PLAA	Phospholipase A-2-activating protein (PLA2P)(PLAP) [Source:UniProtKB/Swiss-Prot;Acc:Q9Y263]	GO:0006644 phospholipid metabolic process,GO:0006954 inflammatory response,GO:0007165 signal transduction	GO:0005488 binding,GO:0005515 protein binding,GO:0016005 phospholipase A2 activator activity	-	150.81	522.576	127.451	444.797	127.451	232.083	1.82095	0.864692			OK	OK
opHsV0400005871	opHsV0400005871	ENSG00000159479	NM_052877;NM_052877	112950	MED8	Mediator of RNA polymerase II transcription subunit 8 (Mediator complex subunit 8)(Activator-recruited cofactor 32 kDa component)(ARC32) [Source:UniProtKB/Swiss-Prot;Acc:Q96G25]	GO:0006350 transcription,GO:0006355 regulation of transcription, DNA-dependent,GO:0006511 ubiquitin-dependent protein catabolic process	-	GO:0005634 nucleus,GO:0000119 mediator complex	571.504	1989.94	548.146	1912.16	548.146	997.712	1.82016	0.864064			OK	OK
H300021264	H300021264	ENSG00000153317	NM_018482	50807	ASAP1	130 kDa phosphatidylinositol 4,5-biphosphate-dependent ARF1 GTPase-activating protein (PIP2-dependent ARF1 GAP)(ADP-ribosylation factor-directed GTPase-activating protein 1)(ARF GTPase-activating protein 1)(Development and differentiation-enhancing factor 1)(Differentiation-enhancing factor 1)(DEF-1) [Source:UniProtKB/Swiss-Prot;Acc:Q9ULH1]	GO:0032312 regulation of ARF GTPase activity	GO:0005515 protein binding,GO:0008270 zinc ion binding,GO:0046872 metal ion binding,GO:0008060 ARF GTPase activator activity	GO:0016020 membrane,GO:0005737 cytoplasm	139.18	481.8	115.821	404.021	115.821	210.807	1.8201	0.864021			OK	OK
H200006278	H200006278	ENSG00000135404	NM_001780	967	CD63	CD63 antigen (Melanoma-associated antigen ME491)(Ocular melanoma-associated antigen)(OMA81H)(Granulophysin)(Tetraspanin-30)(Tspan-30)(Lysosomal-associated membrane protein 3)(Lamp-3)(CD63 antigen) [Source:UniProtKB/Swiss-Prot;Acc:P08962]	GO:0006810 transport,GO:0045807 positive regulation of endocytosis,GO:0045807 positive regulation of endocytosis	GO:0005215 transporter activity	GO:0005886 plasma membrane,GO:0016021 integral to membrane,GO:0016020 membrane,GO:0005887 integral to plasma membrane,GO:0005764 lysosome,GO:0005765 lysosomal membrane,GO:0031902 late endosome membrane,GO:0005770 late endosome	2825.07	9850.77	2801.71	9772.99	2801.71	5099.27	1.82006	0.863984			OK	OK
H300019663	H300019663	ENSG00000078304	NM_002719;NM_178586;NM_178586;NM_178586	-	PPP2R5C	Serine/threonine-protein phosphatase 2A 56 kDa regulatory subunit gamma isoform (PP2A, B subunit, B' gamma isoform)(PP2A, B subunit, B56 gamma isoform)(PP2A, B subunit, PR61 gamma isoform)(PP2A, B subunit, R5 gamma isoform)(Renal carcinoma antigen NY-REN-29) [Source:UniProtKB/Swiss-Prot;Acc:Q13362]	GO:0007165 signal transduction	GO:0005488 binding,GO:0008601 protein phosphatase type 2A regulator activity	GO:0000159 protein phosphatase type 2A complex	230.357	799.811	206.999	722.032	206.999	376.736	1.81999	0.863928			OK	OK
H200009369	H200009369	ENSG00000156510	NM_025130	80201	HKDC1	Putative hexokinase HKDC1 (EC 2.7.1.1)(Hexokinase domain-containing protein 1) [Source:UniProtKB/Swiss-Prot;Acc:Q2TB90]	GO:0006096 glycolysis	GO:0016740 transferase activity,GO:0000166 nucleotide binding,GO:0005524 ATP binding,GO:0016301 kinase activity,GO:0004396 hexokinase activity	-	444.276	1545	420.917	1467.22	420.917	765.554	1.81878	0.862968			OK	OK
H200009490	H200009490	ENSG00000110330	NM_001166	329	BIRC2	Baculoviral IAP repeat-containing protein 2 (Inhibitor of apoptosis protein 2)(HIAP-2)(HIAP2)(C-IAP1)(TNFR2-TRAF-signaling complex protein 2)(IAP homolog B)(RING finger protein 48) [Source:UniProtKB/Swiss-Prot;Acc:Q13490]	GO:0042981 regulation of apoptosis,GO:0007166 cell surface receptor linked signal transduction,GO:0043123 positive regulation of I-kappaB kinase/NF-kappaB cascade,GO:0001890 placenta development,GO:0001666 response to hypoxia,GO:0001666 response to hypoxia	GO:0005515 protein binding,GO:0008270 zinc ion binding,GO:0046872 metal ion binding	GO:0005622 intracellular,GO:0005737 cytoplasm,GO:0005829 cytosol	792.679	2758.67	769.321	2680.89	769.321	1398.81	1.81825	0.862547			OK	OK
H300005705	H300005705	ENSG00000215086	-	-	AC074051.4	-	-	-	-	208.609	722.651	185.25	644.872	185.25	336.476	1.81633	0.861028			OK	OK
H300001123	H300001123	ENSG00000174567	NM_198447	127845	GOLT1A	Vesicle transport protein GOT1A (Golgi transport 1 homolog A)(hGOT1b) [Source:UniProtKB/Swiss-Prot;Acc:Q6ZVE7]	GO:0015031 protein transport,GO:0006813 potassium ion transport,GO:0016192 vesicle-mediated transport	GO:0005249 voltage-gated potassium channel activity	GO:0016021 integral to membrane,GO:0016020 membrane,GO:0005794 Golgi apparatus,GO:0000139 Golgi membrane,GO:0008076 voltage-gated potassium channel complex	360.751	1251.72	337.393	1173.94	337.393	612.528	1.81547	0.860347			OK	OK
CHsGV10002472	CHsGV10002472	-	NM_144780.1;NM_003676.2	8560	DEGS1	Sphingolipid delta(4)-desaturase DES1 (EC 1.14.-.-)(Degenerative spermatocyte homolog 1)(Membrane lipid desaturase)(Migration-inducing gene 15 protein) [Source:UniProtKB/Swiss-Prot;Acc:O15121]	GO:0006629 lipid metabolic process,GO:0006633 fatty acid biosynthetic process,GO:0055114 oxidation reduction,GO:0006636 unsaturated fatty acid biosynthetic process	GO:0005515 protein binding,GO:0016491 oxidoreductase activity,GO:0009055 electron carrier activity	GO:0016021 integral to membrane,GO:0005887 integral to plasma membrane,GO:0005624 membrane fraction,GO:0005783 endoplasmic reticulum,GO:0016020 membrane	510.923	1773.84	487.564	1696.06	487.564	884.955	1.81505	0.860012			OK	OK
opHsV0400000045	opHsV0400000045	ENSG00000100994	NM_002862	-	PYGB	Glycogen phosphorylase, brain form (EC 2.4.1.1) [Source:UniProtKB/Swiss-Prot;Acc:P11216]	GO:0005975 carbohydrate metabolic process	GO:0004645 phosphorylase activity	-	183.346	634.039	159.988	556.26	159.988	290.241	1.81414	0.859289			OK	OK
H300019435	H300019435	ENSG00000136152	NM_031431	83548	COG3	Conserved oligomeric Golgi complex subunit 3 (COG complex subunit 3)(Component of oligomeric Golgi complex 3)(Vesicle-docking protein SEC34 homolog)(p94) [Source:UniProtKB/Swiss-Prot;Acc:Q96JB2]	GO:0006486 protein amino acid glycosylation,GO:0006886 intracellular protein transport,GO:0050821 protein stabilization,GO:0006888 ER to Golgi vesicle-mediated transport,GO:0006890 retrograde vesicle-mediated transport, Golgi to ER,GO:0006891 intra-Golgi vesicle-mediated transport,GO:0033365 protein localization in organelle	GO:0008565 protein transporter activity	GO:0016020 membrane,GO:0005794 Golgi apparatus,GO:0005801 cis-Golgi network,GO:0017119 Golgi transport complex	252.705	875.113	229.346	797.334	229.346	416.026	1.81396	0.859146			OK	OK
H200020421	H200020421	ENSG00000121716	NM_013440	29990	PILRB	Paired immunoglobulin-like type 2 receptor beta Precursor (Activating receptor PILR-beta)(Cell surface receptor FDFACT) [Source:UniProtKB/Swiss-Prot;Acc:Q9UKJ0]	GO:0007171 activation of transmembrane receptor protein tyrosine kinase activity	GO:0005515 protein binding,GO:0004872 receptor activity	GO:0016020 membrane,GO:0005887 integral to plasma membrane	347.785	1204.87	324.427	1127.09	324.427	588.083	1.81268	0.858125			OK	OK
H300021039	H300021039	ENSG00000166037	NM_014679;NM_014679	9702	CEP57	Centrosomal protein of 57 kDa (Cep57 protein)(Testis-specific protein 57)(Translokin)(FGF2-interacting protein) [Source:UniProtKB/Swiss-Prot;Acc:Q86XR8]	GO:0000060 protein import into nucleus, translocation,GO:0007286 spermatid development,GO:0008543 fibroblast growth factor receptor signaling pathway	GO:0005515 protein binding,GO:0042803 protein homodimerization activity,GO:0017134 fibroblast growth factor binding	GO:0005634 nucleus,GO:0005874 microtubule,GO:0005737 cytoplasm,GO:0005794 Golgi apparatus,GO:0005813 centrosome	231.256	799.342	207.897	721.563	207.897	376.491	1.81095	0.856745			OK	OK
opHsV0400007518	opHsV0400007518	ENSG00000172780	NM_198490	339122	RAB43	Ras-related protein Rab-43 (Ras-related protein Rab-41) [Source:UniProtKB/Swiss-Prot;Acc:Q86YS6]	GO:0007165 signal transduction,GO:0015031 protein transport,GO:0007186 G-protein coupled receptor protein signaling pathway,GO:0007264 small GTPase mediated signal transduction,GO:0006886 intracellular protein transport,GO:0006913 nucleocytoplasmic transport	GO:0005515 protein binding,GO:0000166 nucleotide binding,GO:0005525 GTP binding,GO:0003924 GTPase activity,GO:0004871 signal transducer activity,GO:0019001 guanyl nucleotide binding	GO:0005886 plasma membrane,GO:0005622 intracellular	205.219	708.781	181.861	631.002	181.861	329.239	1.81039	0.856302			OK	OK
H200005011	H200005011	ENSG00000110628	NM_002555;NM_002555;NM_002555	5002	SLC22A18	Solute carrier family 22 member 18 (Organic cation transporter-like protein 2)(ORCTL-2)(Imprinted multi-membrane spanning polyspecific transporter-related protein 1)(Efflux transporter-like protein)(Tumor-suppressing subchromosomal transferable fragment candidate gene 5 protein)(Tumor-suppressing STF cDNA 5 protein)(Beckwith-Wiedemann syndrome chromosomal region 1 candidate gene A protein)(p45-Be…	GO:0006811 ion transport,GO:0006810 transport,GO:0007588 excretion,GO:0046677 response to antibiotic,GO:0015904 tetracycline transport,GO:0042493 response to drug	GO:0005215 transporter activity,GO:0015293 symporter activity,GO:0015520 tetracycline:hydrogen antiporter activity	GO:0005886 plasma membrane,GO:0016021 integral to membrane,GO:0016324 apical plasma membrane	184.09	635.076	160.732	557.297	160.732	290.782	1.80911	0.855282			OK	OK
H200005522	H200005522	ENSG00000081791	NM_014773	9812	KIAA0141	Uncharacterized protein KIAA0141 [Source:UniProtKB/Swiss-Prot;Acc:Q14154]	-	GO:0005488 binding	GO:0005739 mitochondrion	177.231	611.164	153.873	533.385	153.873	278.305	1.80867	0.854928			OK	OK
AHsV10001562	AHsV10001562	-	NM_001288.4	1192	CLIC1	Chloride intracellular channel protein 1 (Nuclear chloride ion channel 27)(NCC27)(Chloride channel ABP)(Regulatory nuclear chloride ion channel protein)(hRNCC) [Source:UniProtKB/Swiss-Prot;Acc:O00299]	GO:0006811 ion transport,GO:0006821 chloride transport,GO:0006952 defense response,GO:0006986 response to unfolded protein,GO:0007165 signal transduction,GO:0007584 response to nutrient	GO:0005244 voltage-gated ion channel activity,GO:0005247 voltage-gated chloride channel activity,GO:0005515 protein binding,GO:0031404 chloride ion binding,GO:0051059 NF-kappaB binding	GO:0005624 membrane fraction,GO:0005625 soluble fraction,GO:0005634 nucleus,GO:0005737 cytoplasm,GO:0005829 cytosol,GO:0005886 plasma membrane,GO:0005903 brush border,GO:0016020 membrane,GO:0016021 integral to membrane,GO:0031965 nuclear membrane,GO:00432	3510.65	12162.1	3487.29	12084.3	3487.29	6305.25	1.80807	0.854447			OK	OK
CHsGV10000402	CHsGV10000402	-	NM_015440.3	25902	MTHFD1L	Monofunctional C1-tetrahydrofolate synthase, mitochondrial Precursor (EC 6.3.4.3)(Formyltetrahydrofolate synthetase) [Source:UniProtKB/Swiss-Prot;Acc:Q6UB35]	GO:0046653 tetrahydrofolate metabolic process,GO:0008152 metabolic process,GO:0006730 one-carbon metabolic process,GO:0009396 folic acid and derivative biosynthetic process,GO:0015942 formate metabolic process	GO:0005515 protein binding,GO:0042803 protein homodimerization activity,GO:0005524 ATP binding,GO:0000166 nucleotide binding,GO:0005488 binding,GO:0003824 catalytic activity,GO:0016874 ligase activity,GO:0004329 formate-tetrahydrofolate ligase activity	GO:0005739 mitochondrion	381.312	1317.92	357.954	1240.14	357.954	647.071	1.8077	0.854151			OK	OK
H300022482	H300022482	ENSG00000140750	NM_018054;NM_018054	55114	ARHGAP17	Rho GTPase-activating protein 17 (Rho-type GTPase-activating protein 17)(RhoGAP interacting with CIP4 homologs protein 1)(RICH-1) [Source:UniProtKB/Swiss-Prot;Acc:Q68EM7]	GO:0006412 translation,GO:0007165 signal transduction,GO:0006418 tRNA aminoacylation for protein translation	GO:0005515 protein binding,GO:0000166 nucleotide binding,GO:0005524 ATP binding,GO:0017124 SH3 domain binding,GO:0005096 GTPase activator activity,GO:0004812 aminoacyl-tRNA ligase activity	GO:0016020 membrane,GO:0005622 intracellular,GO:0005737 cytoplasm,GO:0030054 cell junction,GO:0005923 tight junction	320.735	1107.54	297.377	1029.76	297.377	537.299	1.80679	0.853432			OK	OK
H200019305	H200019305	ENSG00000137776	NM_024755	79811	SLTM	SAFB-like transcription modulator (Modulator of estrogen-induced transcription) [Source:UniProtKB/Swiss-Prot;Acc:Q9NWH9]	GO:0006350 transcription,GO:0006355 regulation of transcription, DNA-dependent,GO:0006915 apoptosis	GO:0000166 nucleotide binding,GO:0003676 nucleic acid binding,GO:0003723 RNA binding	GO:0005634 nucleus	327.752	1130.85	304.394	1053.07	304.394	549.461	1.8051	0.852076			OK	OK
H200001515	H200001515	ENSG00000073921	NM_007166;NM_007166	8301	PICALM	Phosphatidylinositol-binding clathrin assembly protein (Clathrin assembly lymphoid myeloid leukemia protein) [Source:UniProtKB/Swiss-Prot;Acc:Q13492]	GO:0006898 receptor-mediated endocytosis,GO:0048268 clathrin coat assembly	GO:0030276 clathrin binding,GO:0017124 SH3 domain binding,GO:0005545 phosphatidylinositol binding,GO:0005543 phospholipid binding	GO:0005886 plasma membrane,GO:0005794 Golgi apparatus,GO:0031410 cytoplasmic vesicle,GO:0045202 synapse,GO:0005905 coated pit,GO:0030136 clathrin-coated vesicle,GO:0030118 clathrin coat	260.104	896.69	236.745	818.91	236.745	427.284	1.80483	0.851862			OK	OK
H200004939	H200004939	ENSG00000112234	NM_012160;NM_012160	26235	FBXL4	F-box/LRR-repeat protein 4 (F-box and leucine-rich repeat protein 4)(F-box protein FBL4/FBL5) [Source:UniProtKB/Swiss-Prot;Acc:Q9UKA2]	GO:0006511 ubiquitin-dependent protein catabolic process	GO:0005515 protein binding	GO:0005634 nucleus,GO:0005737 cytoplasm,GO:0000151 ubiquitin ligase complex	144.628	497.069	121.27	419.29	121.27	218.774	1.80402	0.851217			OK	OK
H200002388	H200002388	ENSG00000166326	NM_017583	54765	TRIM44	Tripartite motif-containing protein 44 (Protein DIPB) [Source:UniProtKB/Swiss-Prot;Acc:Q96DX7]	-	GO:0008270 zinc ion binding,GO:0046872 metal ion binding	GO:0005622 intracellular	197.739	680.517	174.381	602.738	174.381	314.491	1.80348	0.850781			OK	OK
H300020145	H300020145	ENSG00000058600	NM_018119;NM_018119	55718	POLR3E	DNA-directed RNA polymerase III subunit RPC5 (RNA polymerase III subunit C5)(DNA-directed RNA polymerase III 80 kDa polypeptide) [Source:UniProtKB/Swiss-Prot;Acc:Q9NVU0]	GO:0006350 transcription	GO:0003899 DNA-directed RNA polymerase activity	GO:0005634 nucleus	340.01	1171.25	316.652	1093.47	316.652	570.544	1.8018	0.84944			OK	OK
H200018987	H200018987	ENSG00000135124	NM_002560	5025	P2RX4	P2X purinoceptor 4 (P2X4)(ATP receptor)(Purinergic receptor) [Source:UniProtKB/Swiss-Prot;Acc:Q99571]	GO:0007165 signal transduction,GO:0006811 ion transport,GO:0042981 regulation of apoptosis,GO:0050850 positive regulation of calcium-mediated signaling,GO:0008217 regulation of blood pressure,GO:0045429 positive regulation of nitric oxide biosynthetic process,GO:0051899 membrane depolarization,GO:0010524 positive regulation of calcium ion transport into cytosol,GO:0019233 sensory perception of pa…	GO:0008270 zinc ion binding,GO:0005524 ATP binding,GO:0004872 receptor activity,GO:0005102 receptor binding,GO:0005216 ion channel activity,GO:0005507 copper ion binding,GO:0042803 protein homodimerization activity,GO:0046982 protein heterodimerization activity,GO:0001614 purinergic nucleotide receptor activity,GO:0004931 ATP-gated cation channel activity,GO:0045296 cadherin binding	GO:0005886 plasma membrane,GO:0016020 membrane,GO:0030054 cell junction,GO:0005887 integral to plasma membrane,GO:0048471 perinuclear region of cytoplasm	144.611	496.372	121.252	418.592	121.252	218.41	1.80128	0.849022			OK	OK
H300014451	H300014451	ENSG00000132424	-	25957	SFRS18	Splicing factor, arginine/serine-rich 18 (Splicing factor, arginine/serine-rich 130)(Serine-arginine-rich-splicing regulatory protein 130)(SRrp130)(SR-rich protein)(SR-related protein) [Source:UniProtKB/Swiss-Prot;Acc:Q8TF01]	-	-	GO:0005634 nucleus,GO:0016607 nuclear speck	1106.1	3813.58	1082.74	3735.8	1082.74	1949.23	1.80028	0.848218			OK	OK
H300018434	H300018434	ENSG00000023572	NM_016066;NM_016066	51022	GLRX2	Glutaredoxin-2, mitochondrial Precursor [Source:UniProtKB/Swiss-Prot;Acc:Q9NS18]	GO:0009966 regulation of signal transduction,GO:0006810 transport,GO:0045454 cell redox homeostasis,GO:0030154 cell differentiation,GO:0006915 apoptosis,GO:0022900 electron transport chain,GO:0045449 regulation of transcription,GO:0042542 response to hydrogen peroxide,GO:0006467 protein thiol-disulfide exchange,GO:0006749 glutathione metabolic process,GO:0006980 redox signal response,GO:0009266 r…	GO:0046872 metal ion binding,GO:0005506 iron ion binding,GO:0009055 electron carrier activity,GO:0015035 protein disulfide oxidoreductase activity,GO:0051537 2 iron, 2 sulfur cluster binding,GO:0008794 arsenate reductase (glutaredoxin) activity,GO:0015038 glutathione disulfide oxidoreductase activity	GO:0005634 nucleus,GO:0005739 mitochondrion	306.33	1054.01	282.971	976.227	282.971	509.367	1.80007	0.848052			OK	OK
AHsV10001476	AHsV10001476	-	NM_005730.3	10106	CTDSP2	Carboxy-terminal domain RNA polymerase II polypeptide A small phosphatase 2 (EC 3.1.3.16)(Small CTD phosphatase 2)(SCP2)(Nuclear LIM interactor-interacting factor 2)(NLI-interacting factor 2)(Protein OS-4) [Source:UniProtKB/Swiss-Prot;Acc:O14595]	-	GO:0004721 phosphoprotein phosphatase activity,GO:0016787 hydrolase activity,GO:0016791 phosphatase activity	GO:0005625 soluble fraction,GO:0005634 nucleus	630.396	2171.96	607.037	2094.18	607.037	1092.68	1.80003	0.848018			OK	OK
CHsGV10001494	CHsGV10001494	-	NM_020718.3	57478	USP31	Ubiquitin carboxyl-terminal hydrolase 31 (EC 3.1.2.15)(Ubiquitin thioesterase 31)(Ubiquitin-specific-processing protease 31)(Deubiquitinating enzyme 31) [Source:UniProtKB/Swiss-Prot;Acc:Q70CQ4]	GO:0006511 ubiquitin-dependent protein catabolic process	GO:0004221 ubiquitin thiolesterase activity,GO:0008233 peptidase activity,GO:0008234 cysteine-type peptidase activity	-	151.182	518.658	127.823	440.879	127.823	230.038	1.79966	0.847724			OK	OK
AHsV10001076	AHsV10001076	-	NM_005802.2	10210	TOPORS	E3 ubiquitin-protein ligase Topors (EC 6.3.2.-)(SUMO1-protein E3 ligase Topors)(Topoisomerase I-binding RING finger protein)(Topoisomerase I-binding arginine/serine-rich protein)(Tumor suppressor p53-binding protein 3)(p53-binding protein 3)(p53BP3) [Sour	GO:0006915 apoptosis,GO:0006974 response to DNA damage stimulus,GO:0007601 visual perception,GO:0019941 modification-dependent protein catabolic process,GO:0042127 regulation of cell proliferation,GO:0045941 positive regulation of transcription,GO:0050896	GO:0003677 DNA binding,GO:0003823 antigen binding,GO:0005515 protein binding,GO:0008270 zinc ion binding,GO:0016874 ligase activity,GO:0017033 DNA topoisomerase I binding,GO:0046872 metal ion binding	GO:0005634 nucleus,GO:0016607 nuclear speck	135.87	465.76	112.512	387.981	112.512	202.437	1.79926	0.8474			OK	OK
H300021170	H300021170	ENSG00000168488	NM_007245;NM_007245;NM_007245;NM_007245;NM_148414;NM_148414	11273	ATXN2L	Ataxin-2-like protein (Ataxin-2 domain protein)(Ataxin-2-related protein) [Source:UniProtKB/Swiss-Prot;Acc:Q8WWM7]	-	-	-	146.728	503.184	123.369	425.405	123.369	221.964	1.79919	0.847347			OK	OK
H200000730	H200000730	ENSG00000129083	NM_016451	1315	COPB1	Coatomer subunit beta (Beta-coat protein)(Beta-COP) [Source:UniProtKB/Swiss-Prot;Acc:P53618]	GO:0044419 interspecies interaction between organisms,GO:0006886 intracellular protein transport,GO:0016192 vesicle-mediated transport,GO:0016044 membrane organization,GO:0006890 retrograde vesicle-mediated transport, Golgi to ER,GO:0048205 COPI coating of Golgi vesicle,GO:0006891 intra-Golgi vesicle-mediated transport,GO:0006891 intra-Golgi vesicle-mediated transport	GO:0005515 protein binding,GO:0005488 binding,GO:0005198 structural molecule activity,GO:0005515 protein binding	GO:0016020 membrane,GO:0005737 cytoplasm,GO:0005794 Golgi apparatus,GO:0000139 Golgi membrane,GO:0005829 cytosol,GO:0031410 cytoplasmic vesicle,GO:0030117 membrane coat,GO:0005798 Golgi-associated vesicle,GO:0030126 COPI vesicle coat,GO:0005794 Golgi apparatus,GO:0030126 COPI vesicle coat	1397.27	4812.97	1373.91	4735.19	1373.91	2470.69	1.79829	0.846628			OK	OK
AHsV10000398	AHsV10000398	-	NM_024948.2	80013	C10orf97	Protein CARP (Dermal papilla-derived protein 5)(Protein FAM188A) [Source:UniProtKB/Swiss-Prot;Acc:Q9H8M7]	GO:0006915 apoptosis,GO:0007186 G-protein coupled receptor protein signaling pathway	GO:0005509 calcium ion binding	GO:0005634 nucleus,GO:0016021 integral to membrane	210.128	719.887	186.77	642.108	186.77	335.034	1.79383	0.843046			OK	OK
H300019161	H300019161	ENSG00000128595	NM_001219;NM_001219	813	CALU	Calumenin Precursor (Crocalbin)(IEF SSP 9302) [Source:UniProtKB/Swiss-Prot;Acc:O43852]	-	GO:0005509 calcium ion binding	-	1797.33	6176.02	1773.97	6098.24	1773.97	3181.89	1.79366	0.842903			OK	OK
AHsV10000699	AHsV10000699	-	NM_004568.4	5269	SERPINB6	Serpin B6 (Placental thrombin inhibitor)(Cytoplasmic antiproteinase)(CAP)(Proteinase inhibitor 6)(PI-6) [Source:UniProtKB/Swiss-Prot;Acc:P35237]	-	GO:0004867 serine-type endopeptidase inhibitor activity,GO:0005515 protein binding	GO:0005737 cytoplasm,GO:0005813 centrosome,GO:0005829 cytosol	295.246	1012.26	271.887	934.484	271.887	487.587	1.79334	0.842651			OK	OK
H200009643	H200009643	ENSG00000136381	NM_004136	3658	IREB2	Iron-responsive element-binding protein 2 (IRE-BP 2)(Iron regulatory protein 2)(IRP2) [Source:UniProtKB/Swiss-Prot;Acc:P48200]	GO:0008152 metabolic process,GO:0006417 regulation of translation,GO:0006879 cellular iron ion homeostasis,GO:0009791 post-embryonic development,GO:0050892 intestinal absorption,GO:0010468 regulation of gene expression,GO:0034101 erythrocyte homeostasis,GO:0006782 protoporphyrinogen IX biosynthetic process	GO:0046872 metal ion binding,GO:0005506 iron ion binding,GO:0003723 RNA binding,GO:0051539 4 iron, 4 sulfur cluster binding,GO:0030350 iron-responsive element binding	GO:0005737 cytoplasm,GO:0005829 cytosol	207.311	710.001	183.953	632.222	183.953	329.875	1.79326	0.842585			OK	OK
H200002004	H200002004	ENSG00000083937	NM_014043	25978	CHMP2B	Charged multivesicular body protein 2b (Chromatin-modifying protein 2b)(CHMP2b)(CHMP2.5)(Vacuolar protein-sorting-associated protein 2-2)(Vps2-2)(hVps2-2) [Source:UniProtKB/Swiss-Prot;Acc:Q9UQN3]	GO:0015031 protein transport	GO:0019904 protein domain specific binding	GO:0005622 intracellular,GO:0005737 cytoplasm	147.264	503.496	123.905	425.717	123.905	222.127	1.79272	0.842148			OK	OK
H300006449	H300006449	ENSG00000218185	-	-	RP11-430L17.1	-	-	-	-	221.15	757.282	197.791	679.503	197.791	354.545	1.79252	0.841989			OK	OK
opHsV0400000264	opHsV0400000264	ENSG00000137055	NM_001031689;NM_001031689;NM_001031689	-	PLAA	Phospholipase A-2-activating protein (PLA2P)(PLAP) [Source:UniProtKB/Swiss-Prot;Acc:Q9Y263]	-	GO:0005488 binding	-	162.317	554.95	138.959	477.171	138.959	248.974	1.79171	0.841341			OK	OK
H200003738	H200003738	ENSG00000139517	NM_153371	222484	LNX2	Ligand of Numb protein X 2 (Numb-binding protein 2)(PDZ domain-containing RING finger protein 1) [Source:UniProtKB/Swiss-Prot;Acc:Q8N448]	-	GO:0005515 protein binding,GO:0008270 zinc ion binding,GO:0046872 metal ion binding	-	130.712	446.168	107.353	368.389	107.353	192.215	1.79049	0.840353			OK	OK
H200009533	H200009533	ENSG00000148399	NM_138778	92715	WDR85	WD repeat-containing protein 85 [Source:UniProtKB/Swiss-Prot;Acc:Q9BTV6]	-	-	-	157.921	538.77	134.562	460.991	134.562	240.532	1.78751	0.837954			OK	OK
H300019232	H300019232	ENSG00000062598	NM_182764;NM_182764;NM_022086	-	ELMO2	Engulfment and cell motility protein 2 (CED-12 homolog A)(hCED-12A) [Source:UniProtKB/Swiss-Prot;Acc:Q96JJ3]	GO:0006909 phagocytosis	GO:0005488 binding	GO:0005856 cytoskeleton	141.187	481.417	117.828	403.638	117.828	210.607	1.7874	0.837864			OK	OK
H300003886	H300003886	ENSG00000179387	NM_153702	255520	ELMOD2	ELMO domain-containing protein 2 [Source:UniProtKB/Swiss-Prot;Acc:Q8IZ81]	GO:0006909 phagocytosis	-	GO:0005856 cytoskeleton	149.552	509.65	126.194	431.871	126.194	225.338	1.78565	0.836449			OK	OK
H300008768	H300008768	ENSG00000177731	NM_002018	-	FLII	Protein flightless-1 homolog [Source:UniProtKB/Swiss-Prot;Acc:Q13045]	-	GO:0005515 protein binding,GO:0003779 actin binding	-	728.386	2490.05	705.028	2412.27	705.028	1258.65	1.78526	0.83613			OK	OK
opHsV0400001292	opHsV0400001292	ENSG00000163251	NM_003468	7855	FZD5	Frizzled-5 Precursor (Fz-5)(hFz5)(FzE5) [Source:UniProtKB/Swiss-Prot;Acc:Q13467]	GO:0007186 G-protein coupled receptor protein signaling pathway,GO:0007275 multicellular organismal development,GO:0016055 Wnt receptor signaling pathway,GO:0007166 cell surface receptor linked signal transduction,GO:0048469 cell maturation,GO:0007164 establishment of tissue polarity	GO:0005515 protein binding,GO:0004930 G-protein coupled receptor activity,GO:0004926 non-G-protein coupled 7TM receptor activity	GO:0005886 plasma membrane,GO:0016020 membrane,GO:0005794 Golgi apparatus,GO:0000139 Golgi membrane,GO:0005887 integral to plasma membrane	441.196	1507.05	417.837	1429.27	417.837	745.751	1.78479	0.835754			OK	OK
H300010345	H300010345	ENSG00000133606	NM_013446	23608	MKRN1	Makorin-1 (RING finger protein 61) [Source:UniProtKB/Swiss-Prot;Acc:Q9UHC7]	GO:0008150 biological_process,GO:0042309 homoiothermy,GO:0050826 response to freezing	GO:0005515 protein binding,GO:0008270 zinc ion binding,GO:0046872 metal ion binding,GO:0003676 nucleic acid binding,GO:0003723 RNA binding,GO:0003674 molecular_function,GO:0003682 chromatin binding,GO:0050825 ice binding	GO:0005634 nucleus,GO:0005737 cytoplasm,GO:0005575 cellular_component,GO:0031965 nuclear membrane	348.86	1191.02	325.501	1113.24	325.501	580.857	1.7845	0.83552			OK	OK
AHsV10002193	AHsV10002193	-	NM_021237.3	58515	AC012467.9-1	Selenoprotein K (SelK) [Source:UniProtKB/Swiss-Prot;Acc:Q9Y6D0]	GO:0006979 response to oxidative stress	GO:0008430 selenium binding	GO:0005634 nucleus,GO:0005737 cytoplasm,GO:0005783 endoplasmic reticulum	1025.82	3505.08	1002.46	3427.3	1002.46	1788.27	1.78387	0.835011			OK	OK
AHsV10001645	AHsV10001645	-	NM_002024.4	2332	FMR1	Fragile X mental retardation 1 protein (Protein FMR-1)(FMRP) [Source:UniProtKB/Swiss-Prot;Acc:Q06787]	GO:0006810 transport,GO:0051028 mRNA transport	GO:0003723 RNA binding,GO:0003729 mRNA binding,GO:0005515 protein binding	GO:0005625 soluble fraction,GO:0005634 nucleus,GO:0005654 nucleoplasm,GO:0005730 nucleolus,GO:0005737 cytoplasm,GO:0042788 polysomal ribosome	206.73	704.694	183.371	626.915	183.371	327.106	1.78384	0.83499			OK	OK
H200002791	H200002791	ENSG00000204160	NM_032283	-	ZDHHC18	Palmitoyltransferase ZDHHC18 (EC 2.3.1.-)(Zinc finger DHHC domain-containing protein 18)(DHHC-18) [Source:UniProtKB/Swiss-Prot;Acc:Q9NUE0]	-	GO:0008270 zinc ion binding	-	193.908	660.751	170.55	582.971	170.55	304.178	1.78351	0.834722			OK	OK
H200001679	H200001679	ENSG00000134759	NM_018255	55250	STATIP1	Elongator complex protein 2 (ELP2)(STAT3-interacting protein)(StIP1)(SHINC-2) [Source:UniProtKB/Swiss-Prot;Acc:Q6IA86]	GO:0006350 transcription,GO:0006357 regulation of transcription from RNA polymerase II promoter	GO:0003677 DNA binding,GO:0016944 RNA polymerase II transcription elongation factor activity	GO:0005634 nucleus,GO:0005737 cytoplasm,GO:0005730 nucleolus,GO:0008023 transcription elongation factor complex,GO:0016591 DNA-directed RNA polymerase II, holoenzyme	459.515	1568.52	436.157	1490.74	436.157	777.825	1.78336	0.834599			OK	OK
H200005737	H200005737	ENSG00000062194	NM_022913	65056	GPBP1	Vasculin (GC-rich promoter-binding protein 1)(Vascular wall-linked protein) [Source:UniProtKB/Swiss-Prot;Acc:Q86WP2]	GO:0006350 transcription,GO:0045893 positive regulation of transcription, DNA-dependent	GO:0005515 protein binding,GO:0003700 transcription factor activity	GO:0005634 nucleus,GO:0005737 cytoplasm	496.068	1693.05	472.709	1615.27	472.709	842.801	1.78292	0.834239			OK	OK
opHsV0400001319	opHsV0400001319	ENSG00000155975	NM_152415;NM_152415	137492	VPS37A	Vacuolar protein sorting-associated protein 37A (hVps37A)(Hepatocellular carcinoma-related protein 1) [Source:UniProtKB/Swiss-Prot;Acc:Q8NEZ2]	GO:0015031 protein transport	-	GO:0016020 membrane,GO:0005634 nucleus,GO:0005737 cytoplasm,GO:0005768 endosome,GO:0031902 late endosome membrane	235.993	803.622	212.634	725.843	212.634	378.724	1.7811	0.832773			OK	OK
H200007063	H200007063	ENSG00000039319	NM_014733	9765	ZFYVE16	Zinc finger FYVE domain-containing protein 16 (Endofin)(Endosome-associated FYVE domain protein) [Source:UniProtKB/Swiss-Prot;Acc:Q7Z3T8]	GO:0007165 signal transduction,GO:0016197 endosome transport,GO:0006622 protein targeting to lysosome,GO:0016050 vesicle organization and biogenesis,GO:0030100 regulation of endocytosis,GO:0030509 BMP signaling pathway	GO:0005515 protein binding,GO:0008270 zinc ion binding,GO:0046872 metal ion binding,GO:0008565 protein transporter activity,GO:0005545 phosphatidylinositol binding	GO:0016020 membrane,GO:0005737 cytoplasm,GO:0031901 early endosome membrane	133.011	451.77	109.653	373.99	109.653	195.138	1.7796	0.831552			OK	OK
H200004441	H200004441	ENSG00000120458	NM_024631;NM_024631	79684	C11orf61	Uncharacterized protein C11orf61 [Source:UniProtKB/Swiss-Prot;Acc:Q6P1R3]	GO:0006355 regulation of transcription, DNA-dependent	GO:0003677 DNA binding,GO:0004879 ligand-dependent nuclear receptor activity	GO:0005634 nucleus	141.985	482.168	118.626	404.389	118.626	210.999	1.77868	0.830809			OK	OK
H200006403	H200006403	ENSG00000144224	NM_014607	23190	UBXD2	UBX domain-containing protein 4 (UBX domain-containing protein 2)(Erasin) [Source:UniProtKB/Swiss-Prot;Acc:Q92575]	GO:0006355 regulation of transcription, DNA-dependent,GO:0006986 response to unfolded protein	GO:0003677 DNA binding,GO:0005515 protein binding,GO:0004887 thyroid hormone receptor activity	GO:0016021 integral to membrane,GO:0016020 membrane,GO:0005634 nucleus,GO:0005783 endoplasmic reticulum,GO:0005789 endoplasmic reticulum membrane,GO:0005635 nuclear envelope	698.091	2376.72	674.732	2298.94	674.732	1199.52	1.77777	0.83007			OK	OK
AHsV10001407	AHsV10001407	-	NM_016107.3	51663	ZFR	Zinc finger RNA-binding protein (hZFR)(M-phase phosphoprotein homolog) [Source:UniProtKB/Swiss-Prot;Acc:Q96KR1]	GO:0006355 regulation of transcription, DNA-dependent,GO:0006412 translation,GO:0007275 multicellular organismal development,GO:0042309 homoiothermy,GO:0050826 response to freezing	GO:0003676 nucleic acid binding,GO:0003677 DNA binding,GO:0003723 RNA binding,GO:0003735 structural constituent of ribosome,GO:0004879 ligand-dependent nuclear receptor activity,GO:0008270 zinc ion binding,GO:0050825 ice binding	GO:0005622 intracellular,GO:0005634 nucleus,GO:0005737 cytoplasm,GO:0005840 ribosome	287.982	979.375	264.623	901.596	264.623	470.427	1.77772	0.830032			OK	OK
H300001893	H300001893	ENSG00000137814	NM_018097	55142	CEP27	Centrosomal protein of 27 kDa (Cep27) [Source:UniProtKB/Swiss-Prot;Acc:Q9NVX0]	-	-	GO:0005813 centrosome	169.107	574.303	145.749	496.524	145.749	259.072	1.77753	0.829872			OK	OK
H200019845	H200019845	ENSG00000152413	NM_004272	-	HOMER1	Homer protein homolog 1 [Source:UniProtKB/Swiss-Prot;Acc:Q86YM7]	-	-	-	175.16	594.726	151.802	516.947	151.802	269.728	1.77685	0.829318			OK	OK
H200004138	H200004138	ENSG00000143612	NM_001098616;NM_001098616;NM_001098616	25912	C1orf43	Uncharacterized protein C1orf43 (Hepatitis C virus NS5A-transactivated protein 4)(HCV NS5A-transactivated protein 4)(Protein NICE-3)(S863-3) [Source:UniProtKB/Swiss-Prot;Acc:Q9BWL3]	GO:0009405 pathogenesis	GO:0004308 exo-alpha-sialidase activity	GO:0016021 integral to membrane,GO:0016020 membrane,GO:0005737 cytoplasm,GO:0005739 mitochondrion	1815.94	6179.07	1792.58	6101.29	1792.58	3183.48	1.77592	0.828564			OK	OK
CHsGV10000829	CHsGV10000829	-	NM_018183.2	55206	SBNO1	Protein strawberry notch homolog 1 (Monocyte protein 3)(MOP-3) [Source:UniProtKB/Swiss-Prot;Acc:A3KN83]	-	GO:0003824 catalytic activity	-	761.186	2586.87	737.827	2509.09	737.827	1309.17	1.77436	0.827302			OK	OK
H300004897	H300004897	ENSG00000120555	-	-	RP11-291L22.2	Septin [Source:UniProtKB/TrEMBL;Acc:Q5W161]	GO:0007049 cell cycle	GO:0005525 GTP binding	-	157.482	533.797	134.123	456.018	134.123	237.937	1.77402	0.827019			OK	OK
H300020219	H300020219	ENSG00000143207	NM_022457;NM_022457;NM_022457;NM_022457	-	RFWD2	E3 ubiquitin-protein ligase RFWD2 (EC 6.3.2.-)(RING finger and WD repeat domain protein 2)(Constitutive photomorphogenesis protein 1 homolog)(hCOP1)(RING finger protein 200) [Source:UniProtKB/Swiss-Prot;Acc:Q8NHY2]	-	-	-	214.183	726.39	190.824	648.61	190.824	338.427	1.7735	0.826599			OK	OK
AHsV10003514	AHsV10003514	-	NM_017776.2	55634	ZNF673	Protein ZNF673 [Source:UniProtKB/Swiss-Prot;Acc:Q5JUW0]	GO:0006355 regulation of transcription, DNA-dependent	GO:0003676 nucleic acid binding	GO:0005622 intracellular	125.155	423.769	101.797	345.99	101.797	180.528	1.77341	0.826528			OK	OK
CHsGV10002856	CHsGV10002856	-	NM_173810.3	283237	TTC9C	Tetratricopeptide repeat protein 9C (TPR repeat protein 9C) [Source:UniProtKB/Swiss-Prot;Acc:Q8N5M4]	GO:0006457 protein folding	GO:0005488 binding	-	175.765	595.749	152.407	517.97	152.407	270.262	1.7733	0.826433			OK	OK
CHsGV10000230	CHsGV10000230	-	NM_001145099.1;NM_017585.3	11182	SLC2A6	Solute carrier family 2, facilitated glucose transporter member 6 (Glucose transporter type 6)(GLUT-6)(Glucose transporter type 9)(GLUT-9) [Source:UniProtKB/Swiss-Prot;Acc:Q9UGQ3]	GO:0006810 transport,GO:0008643 carbohydrate transport,GO:0055085 transmembrane transport	GO:0005215 transporter activity,GO:0005355 glucose transmembrane transporter activity,GO:0022891 substrate-specific transmembrane transporter activity	GO:0016021 integral to membrane,GO:0005886 plasma membrane,GO:0016020 membrane	256.533	870.167	233.175	792.388	233.175	413.445	1.77311	0.826285			OK	OK
H300011843	H300011843	ENSG00000189180	NM_006974;NM_006974	7581	ZNF33A	Zinc finger protein 33A (Zinc finger protein 11A)(Zinc finger protein KOX31)(Zinc finger and ZAK-associated protein with KRAB domain)(ZZaPK) [Source:UniProtKB/Swiss-Prot;Acc:Q06730]	GO:0006350 transcription,GO:0006355 regulation of transcription, DNA-dependent	GO:0008270 zinc ion binding,GO:0046872 metal ion binding,GO:0003700 transcription factor activity,GO:0003676 nucleic acid binding,GO:0043565 sequence-specific DNA binding	GO:0005634 nucleus,GO:0005622 intracellular	153.657	520.446	130.299	442.667	130.299	230.971	1.77262	0.825887			OK	OK
CHsGV10000042	CHsGV10000042	-	NM_015348.1	23505	TMEM131	Transmembrane protein 131 (Protein RW1) [Source:UniProtKB/Swiss-Prot;Acc:Q92545]	GO:0008150 biological_process	GO:0003674 molecular_function	GO:0016021 integral to membrane,GO:0005575 cellular_component,GO:0016020 membrane	133.031	450.166	109.673	372.387	109.673	194.301	1.77164	0.825087			OK	OK
CHsGV10000613	CHsGV10000613	-	NM_015292.1	23344	ESYT1	Extended synaptotagmin-1 (E-Syt1)(Membrane-bound C2 domain-containing protein)(Protein FAM62A) [Source:UniProtKB/Swiss-Prot;Acc:Q9BSJ8]	GO:0007186 G-protein coupled receptor protein signaling pathway	-	GO:0016021 integral to membrane,GO:0016020 membrane	127.747	432.192	104.389	354.413	104.389	184.923	1.77148	0.824958			OK	OK
opHsV0400000271	opHsV0400000271	ENSG00000204592	NM_005516;NM_005516	3133	HLA-E	major histocompatibility complex, class I, E precursor [Source:RefSeq peptide;Acc:NP_005507]	GO:0006955 immune response,GO:0019882 antigen processing and presentation	-	GO:0016020 membrane,GO:0042612 MHC class I protein complex	432.828	1467.76	409.47	1389.98	409.47	725.252	1.7712	0.824726			OK	OK
H200019621	H200019621	ENSG00000183718	NM_032765	84851	TRIM52	Tripartite motif-containing protein 52 (RING finger protein 102) [Source:UniProtKB/Swiss-Prot;Acc:Q96A61]	-	GO:0005515 protein binding,GO:0008270 zinc ion binding,GO:0046872 metal ion binding	GO:0005622 intracellular	141.203	477.758	117.845	399.979	117.845	208.698	1.77096	0.824528			OK	OK
H300022234	H300022234	ENSG00000138081	NM_025133;NM_025133;NM_025133	80204	FBXO11	F-box only protein 11 (Vitiligo-associated protein 1)(VIT-1) [Source:UniProtKB/Swiss-Prot;Acc:Q86XK2]	GO:0007155 cell adhesion,GO:0006511 ubiquitin-dependent protein catabolic process,GO:0007186 G-protein coupled receptor protein signaling pathway,GO:0016567 protein ubiquitination,GO:0006464 protein modification process	GO:0005515 protein binding,GO:0008270 zinc ion binding,GO:0046872 metal ion binding,GO:0005198 structural molecule activity,GO:0004842 ubiquitin-protein ligase activity,GO:0008469 histone-arginine N-methyltransferase activity,GO:0035244 peptidyl-arginine C-methyltransferase activity	GO:0016021 integral to membrane,GO:0005634 nucleus,GO:0005622 intracellular,GO:0005737 cytoplasm,GO:0000151 ubiquitin ligase complex,GO:0015629 actin cytoskeleton	310.24	1051.4	286.881	973.625	286.881	508.01	1.7708	0.824402			OK	OK
H300021797	H300021797	ENSG00000100731	NM_014982	22990	PCNX	Pecanex-like protein 1 (Pecanex homolog) [Source:UniProtKB/Swiss-Prot;Acc:Q96RV3]	-	-	GO:0016021 integral to membrane,GO:0016020 membrane	138.8	469.514	115.442	391.734	115.442	204.396	1.77056	0.824202			OK	OK
AHsV10001307	AHsV10001307	-	NM_001003803.1	27109	ATP5S	ATP synthase subunit s, mitochondrial Precursor (ATP synthase-coupling factor B)(Mitochondrial ATP synthase regulatory component factor B) [Source:UniProtKB/Swiss-Prot;Acc:Q99766]	GO:0006754 ATP biosynthetic process,GO:0006811 ion transport,GO:0015992 proton transport	GO:0015078 hydrogen ion transmembrane transporter activity	GO:0005739 mitochondrion,GO:0005743 mitochondrial inner membrane,GO:0016020 membrane,GO:0045263 proton-transporting ATP synthase complex, coupling factor F(o)	361.076	1223.71	337.717	1145.93	337.717	597.913	1.77046	0.824121			OK	OK
H200011743	H200011743	ENSG00000168209	NM_019058	54541	DDIT4	DNA-damage-inducible transcript 4 protein (Protein regulated in development and DNA damage response 1)(REDD-1)(HIF-1 responsive protein RTP801) [Source:UniProtKB/Swiss-Prot;Acc:Q9NX09]	GO:0006915 apoptosis,GO:0009968 negative regulation of signal transduction	-	GO:0005622 intracellular,GO:0005737 cytoplasm	1568.76	5320.8	1545.4	5243.02	1545.4	2735.66	1.77019	0.823903			OK	OK
AHsV10002439	AHsV10002439	-	NM_001080510.2	124512	C17orf95	UPF0563 protein C17orf95 [Source:UniProtKB/Swiss-Prot;Acc:Q86XA0]	-	-	GO:0016020 membrane,GO:0016021 integral to membrane	624.026	2112.99	600.668	2035.21	600.668	1061.92	1.76789	0.822029			OK	OK
H300007748	H300007748	ENSG00000106299	NM_003941	8976	WASL	Neural Wiskott-Aldrich syndrome protein (N-WASP) [Source:UniProtKB/Swiss-Prot;Acc:O00401]	GO:0006350 transcription,GO:0006355 regulation of transcription, DNA-dependent,GO:0007155 cell adhesion,GO:0007186 G-protein coupled receptor protein signaling pathway,GO:0006461 protein complex assembly,GO:0006928 cell motion,GO:0008154 actin polymerization or depolymerization,GO:0009617 response to bacterium	GO:0005515 protein binding,GO:0003779 actin binding,GO:0005198 structural molecule activity,GO:0005179 hormone activity,GO:0005083 small GTPase regulator activity,GO:0005199 structural constituent of cell wall	GO:0016021 integral to membrane,GO:0005634 nucleus,GO:0005576 extracellular region,GO:0005737 cytoplasm,GO:0030027 lamellipodium,GO:0005730 nucleolus,GO:0015629 actin cytoskeleton	369.616	1250.97	346.257	1173.19	346.257	612.139	1.76787	0.822015			OK	OK
H300019422	H300019422	ENSG00000135912	NM_014640	9654	TTLL4	Tubulin polyglutamylase TTLL4 (EC 6.-.-.-)(Tubulin--tyrosine ligase-like protein 4) [Source:UniProtKB/Swiss-Prot;Acc:Q14679]	GO:0006464 protein modification process	GO:0016874 ligase activity,GO:0004835 tubulin-tyrosine ligase activity	GO:0005929 cilium	339.408	1148.41	316.05	1070.63	316.05	558.626	1.76753	0.821731			OK	OK
[truncated: 542 more rows]

## Sheet: Downregulated
Name	ID	ensembl_id	RefSeq_id	Enterz_id	symbol	description	GO_biological_process	GO_molecular_function	GO_cellular_component	rawdata_Cy5	rawdata_Cy3	BG subtraction_Cy5	BG subtraction_Cy3	Normalized_Cy5	Normalized_Cy3	ratio(Cy3/Cy5)	LOG2[ratio(Cy3/Cy5)]	up	down	Flag_Cy5	Flag_Cy3
AHsV10003358	AHsV10003358	-	NM_005143.3	3240	HP	Haptoglobin Precursor [Contains Haptoglobin alpha chain;Haptoglobin beta chain] [Source:UniProtKB/Swiss-Prot;Acc:P00738]	GO:0006508 proteolysis,GO:0006879 cellular iron ion homeostasis,GO:0006952 defense response	GO:0003824 catalytic activity,GO:0004252 serine-type endopeptidase activity,GO:0030492 hemoglobin binding	GO:0005576 extracellular region	1659.82	297.954	1636.46	220.175	1636.46	114.881	0.070201	-3.83236		***	OK	OK
[truncated: 1,283 more rows]
